# Supplementary material
Source: PubMed Central journal article supplement (PMC3262037)

# Martingale residuals—Clinical Predictors

Cohort: **Derivation**

Outcome: **Mortality**

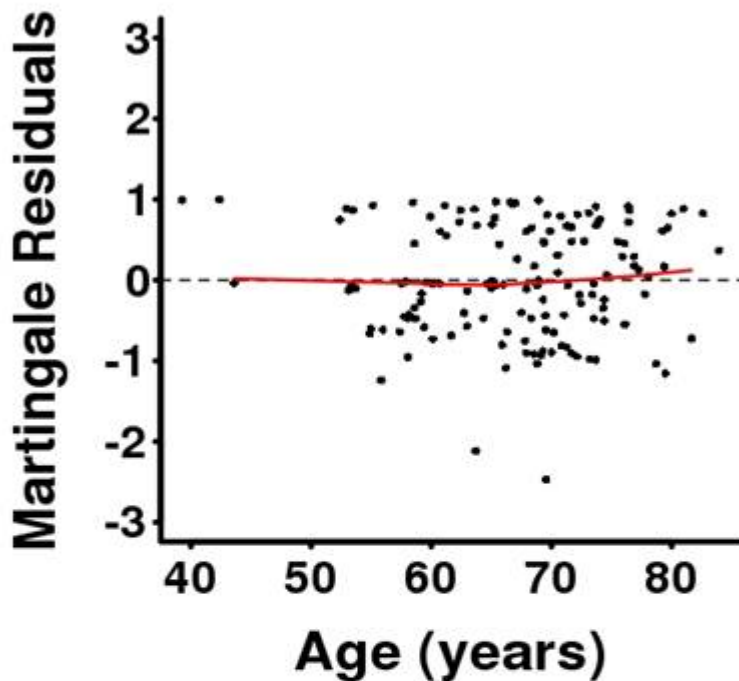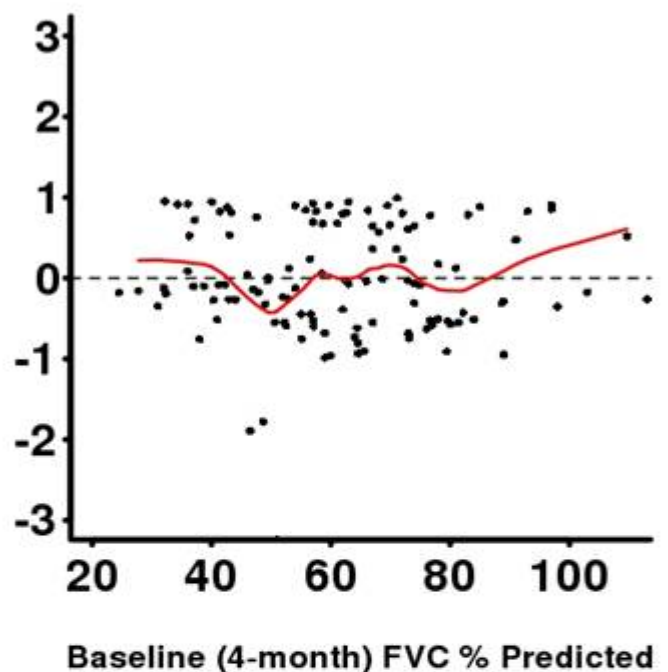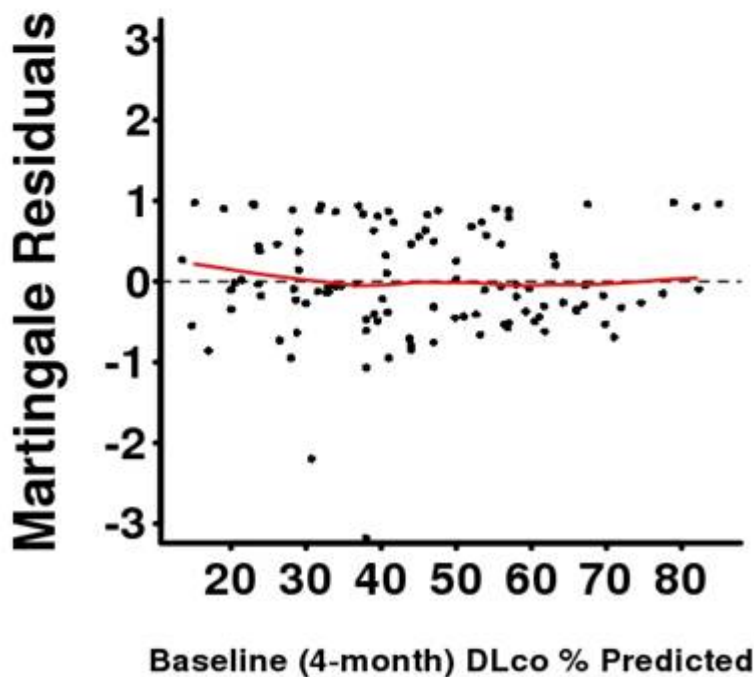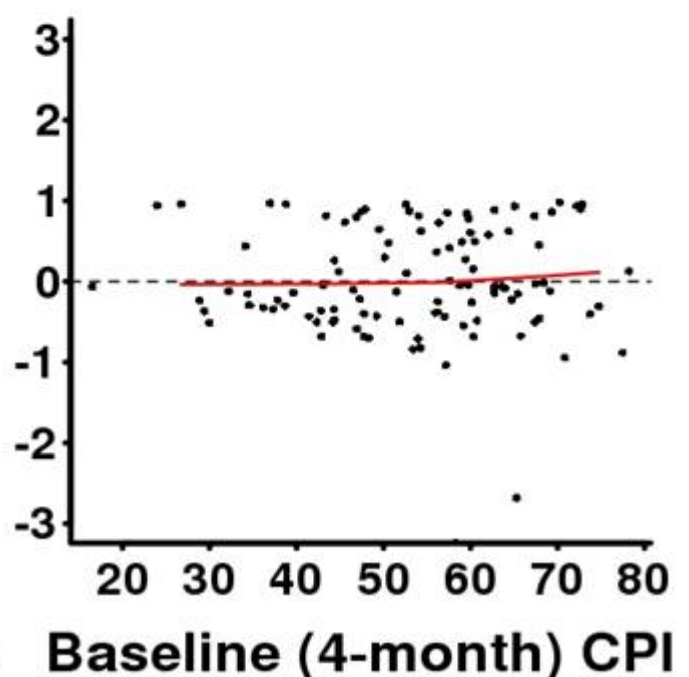

Martingale residuals  
—Biomarkers  
Cohort: **Derivation**  
Outcome: **Mortality**

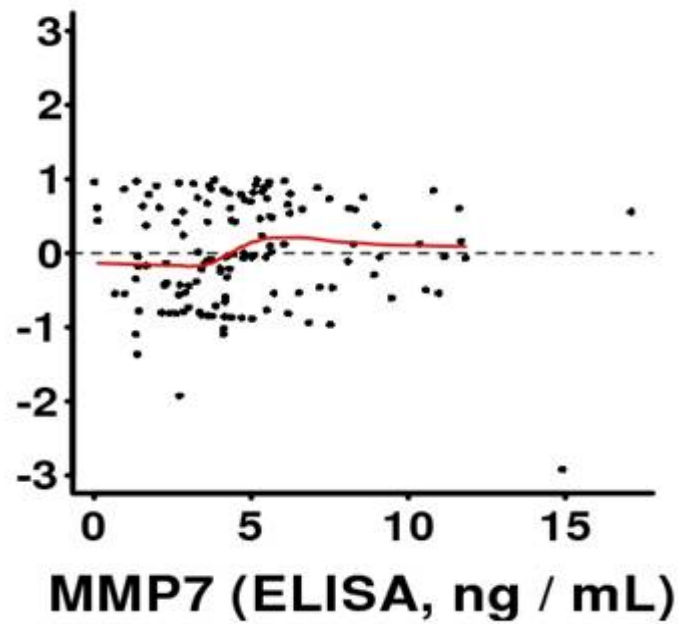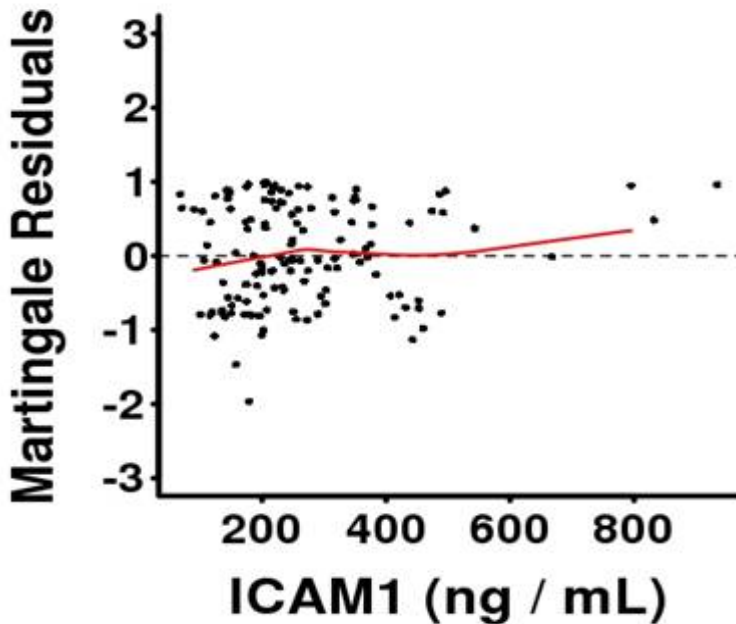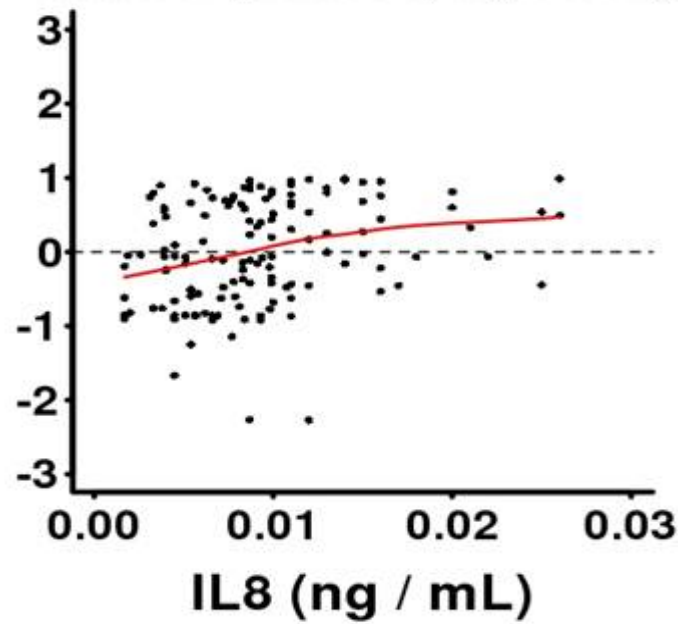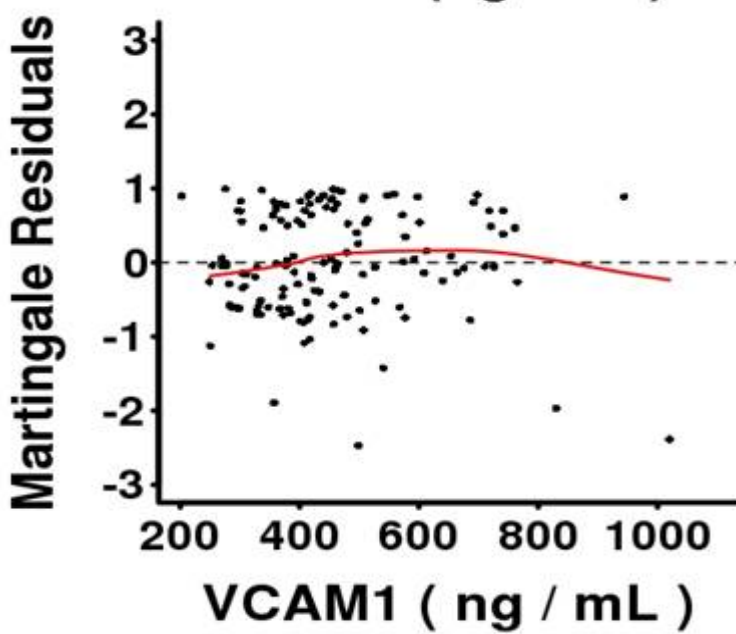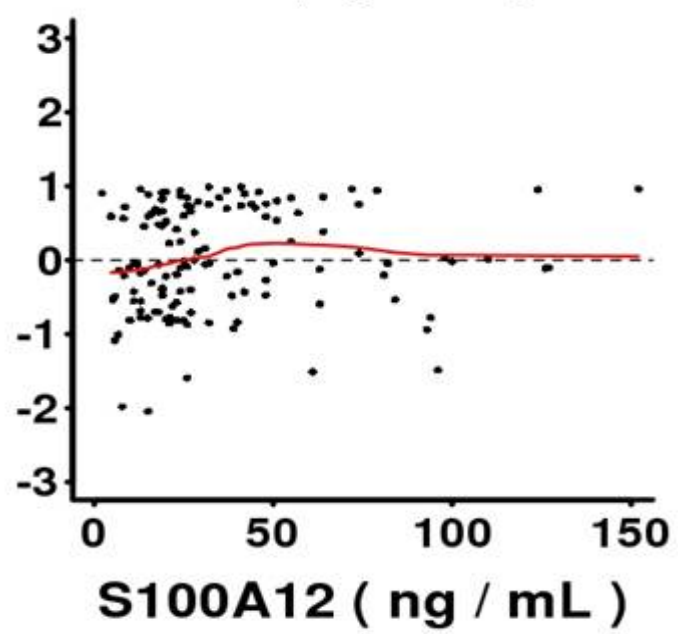

# Martingale residuals—Clinical Predictors

Cohort: **Derivation**

Outcome: **Transplant Free Survival**

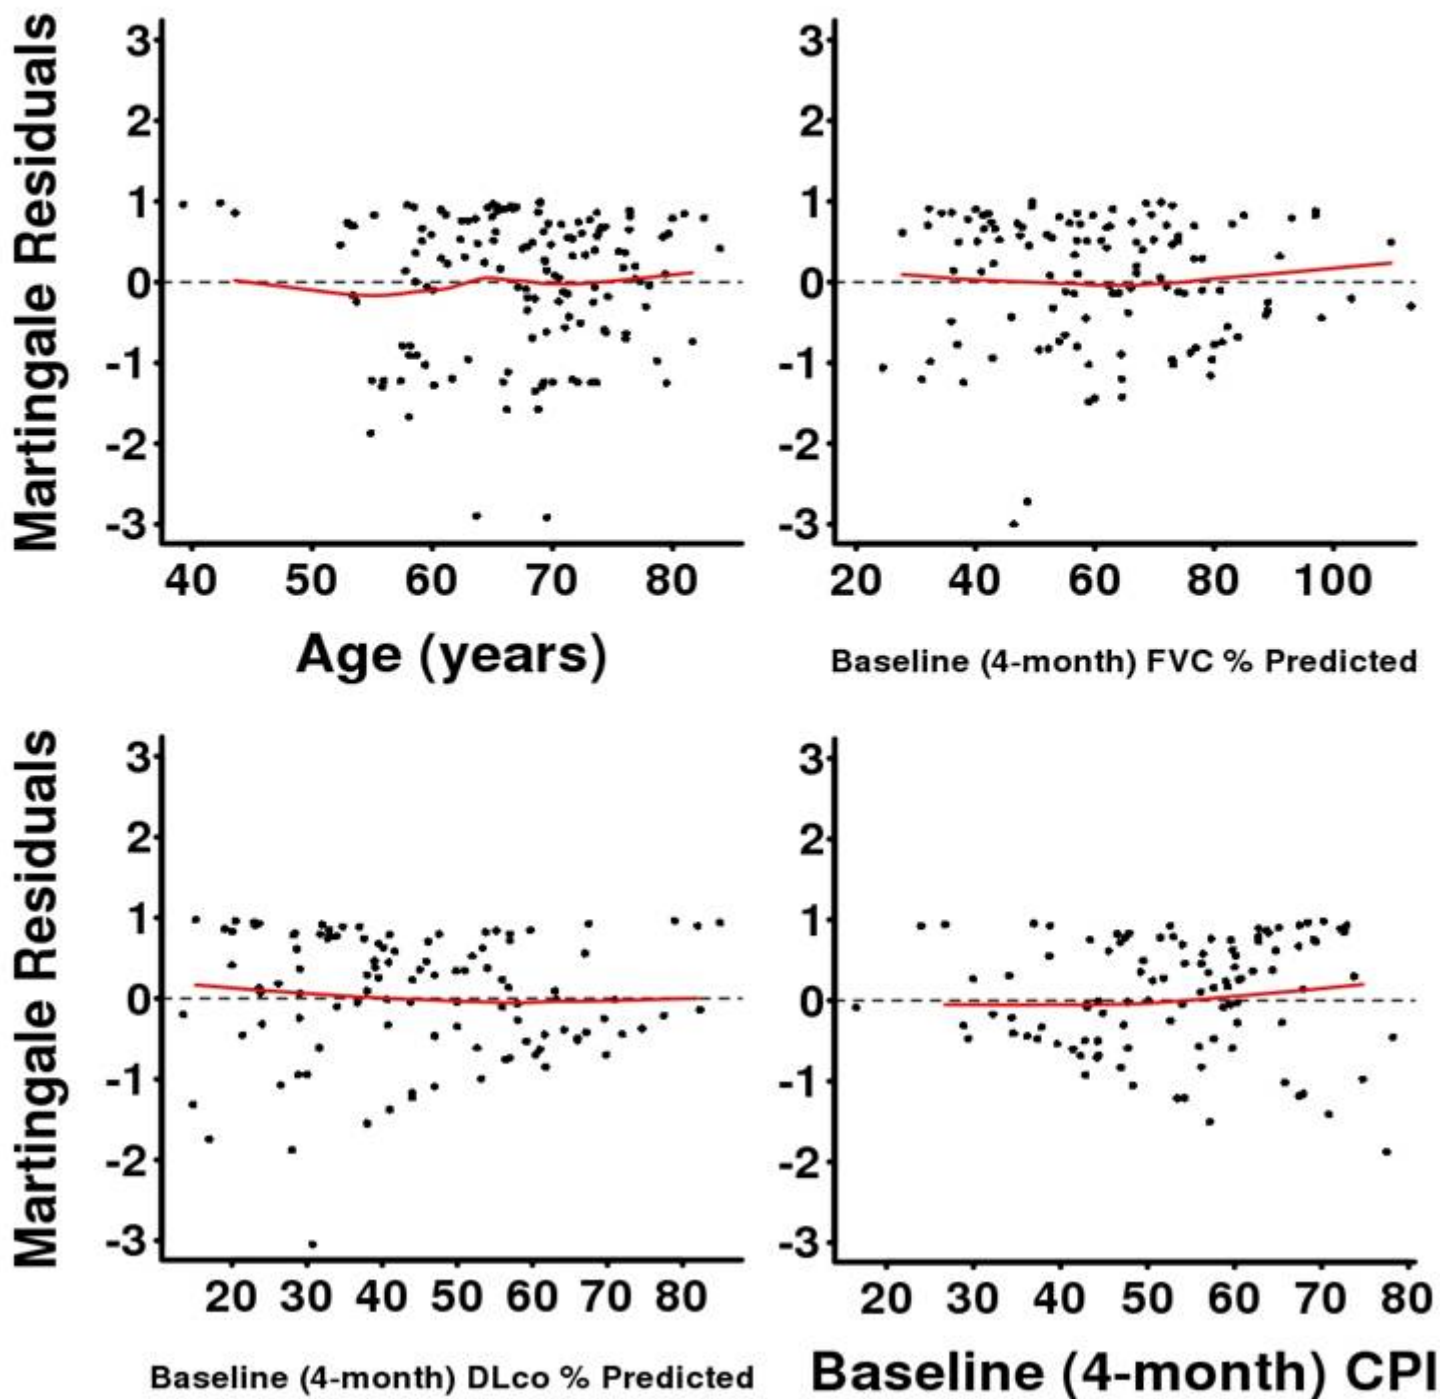

# Martingale residuals

—Biomarkers

Cohort: **Derivation**

Outcome: **Transplant  
Free Survival**

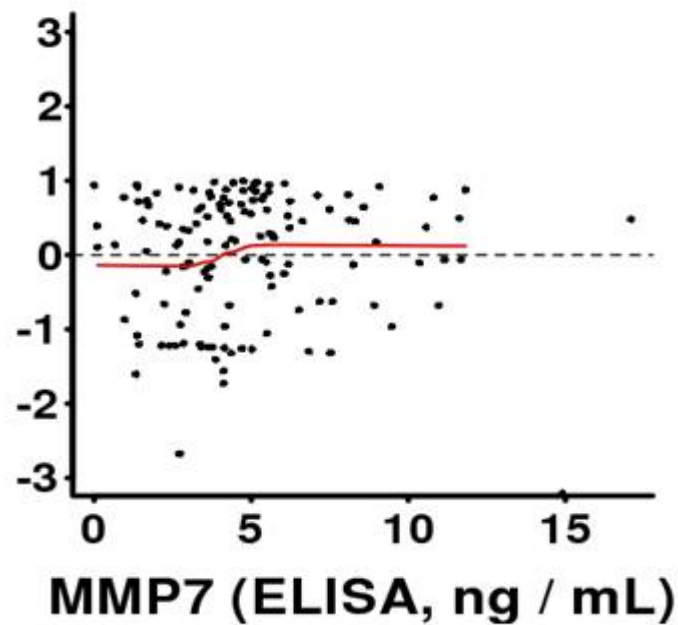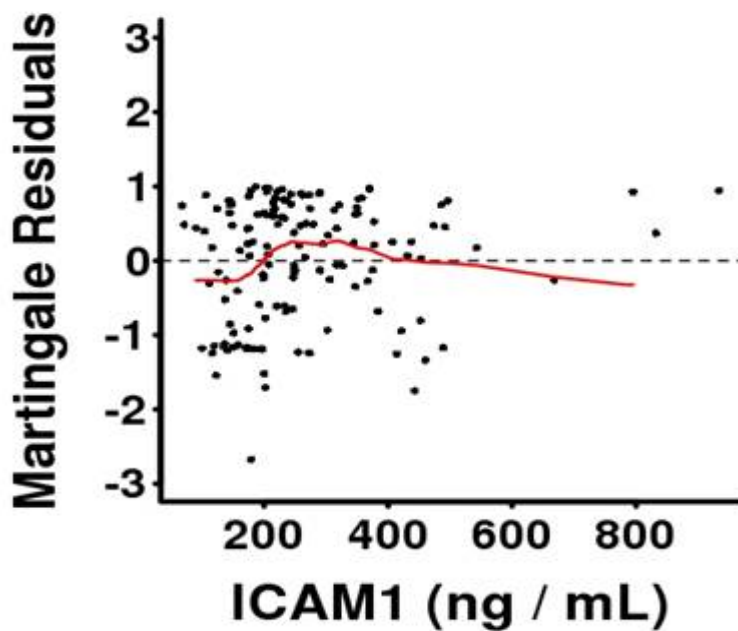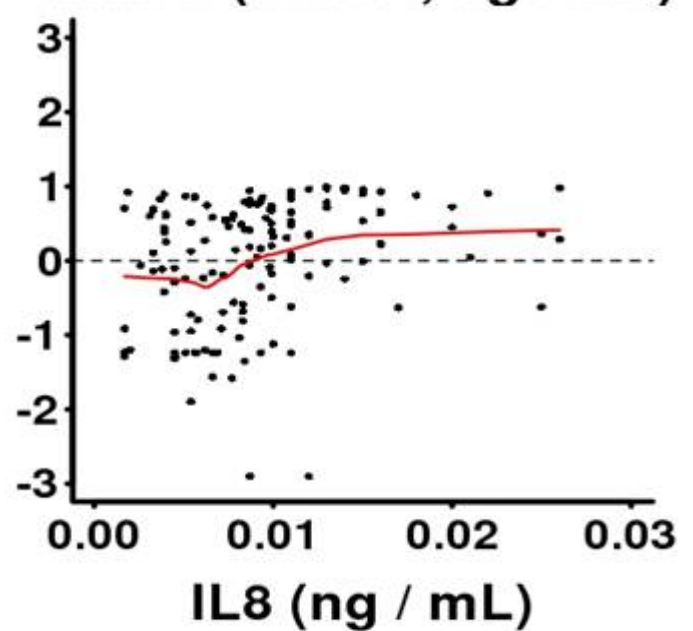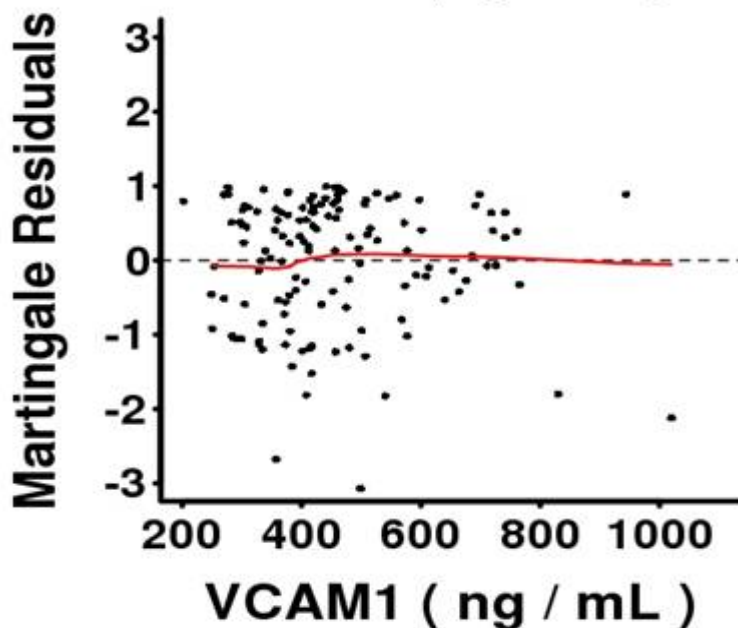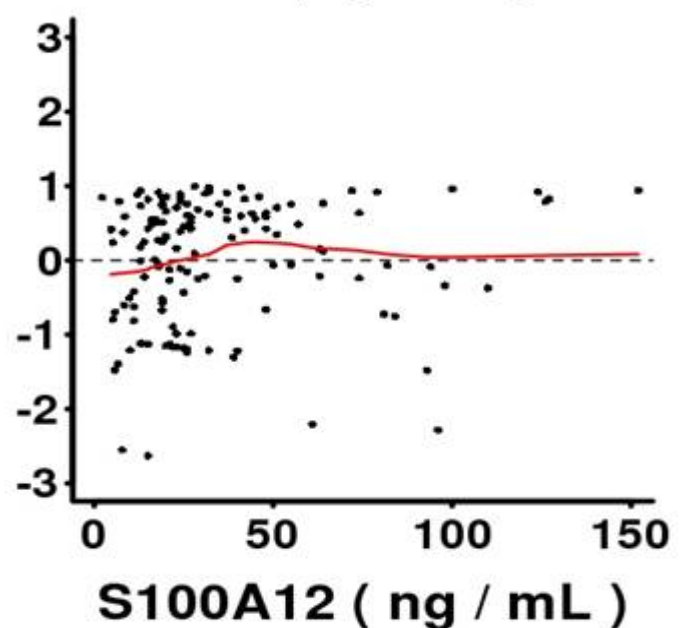

# Martingale residuals—Clinical Predictors

Cohort: **Derivation**

Outcome: **Progression Free Survival by FVC  
(Lung Transplant is Censored)**

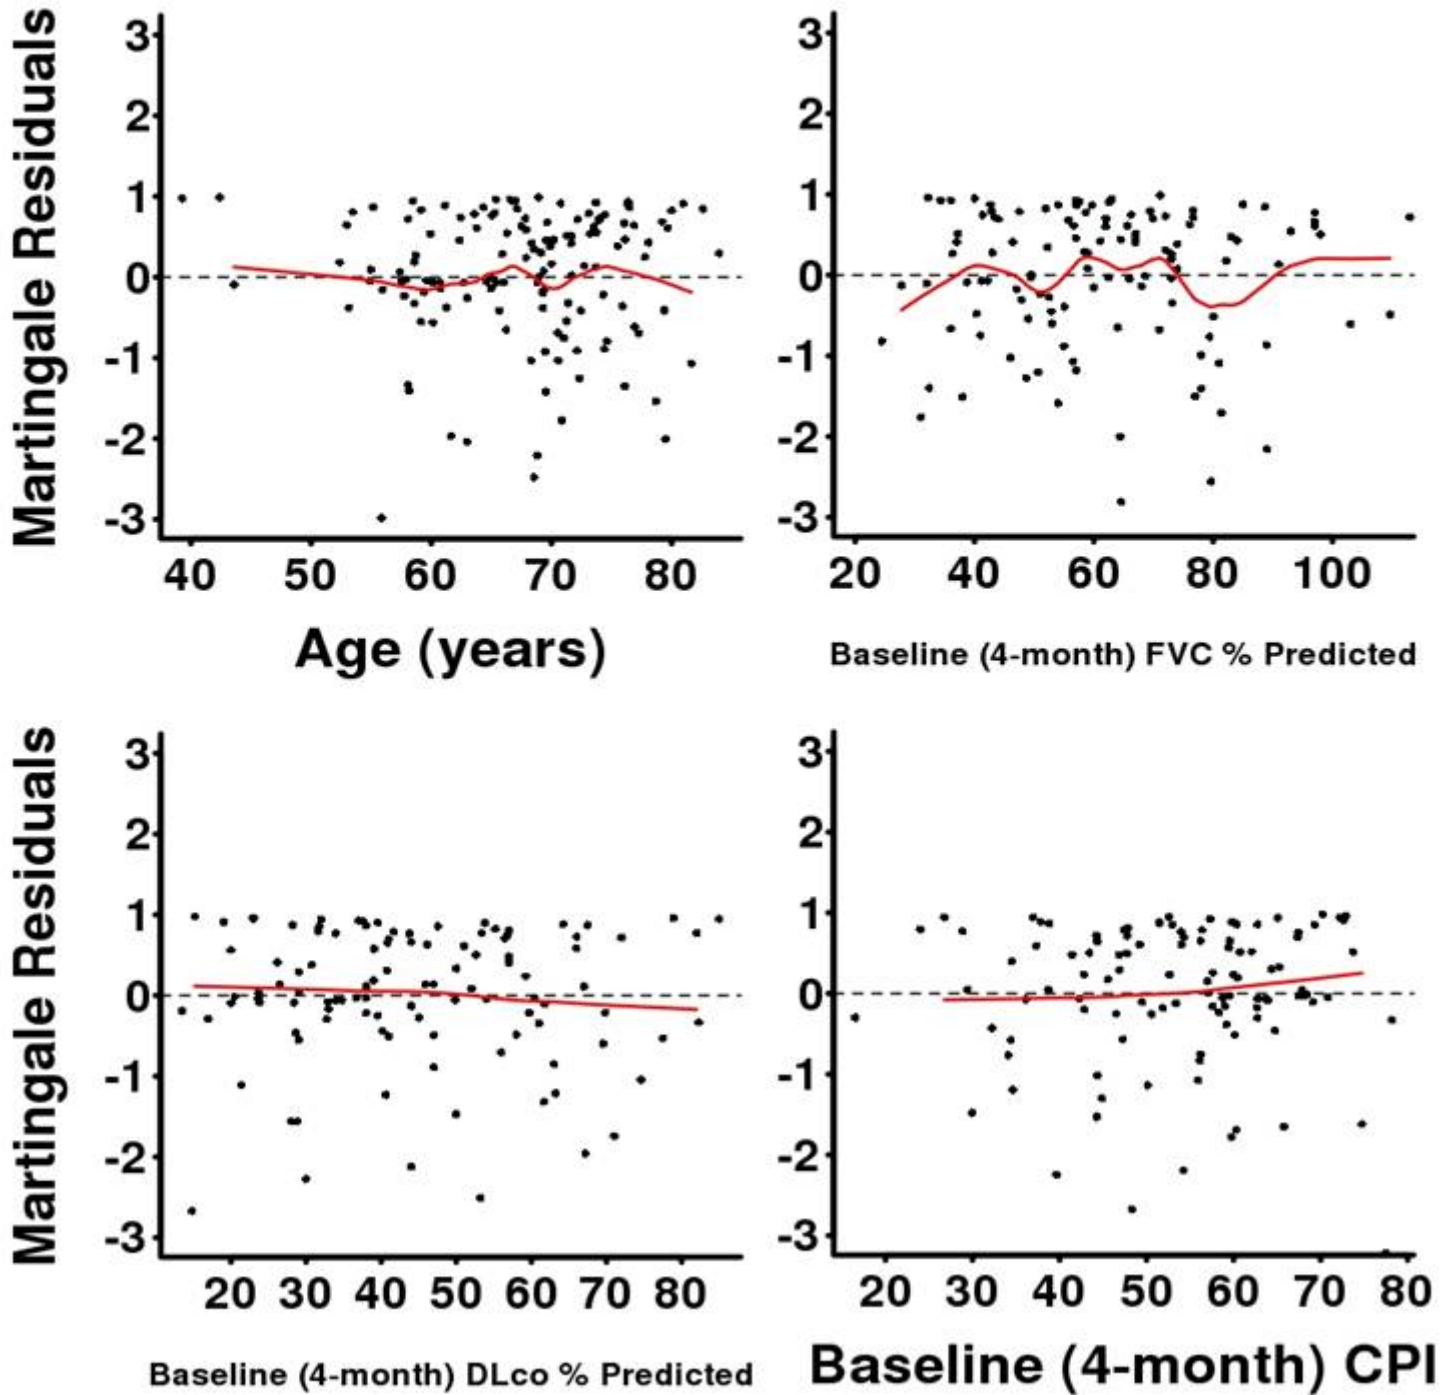

# Martingale residuals

—Biomarkers

Cohort: **Derivation**

Outcome: **Progression**

**Free Survival by FVC  
(Lung Transplant is  
Censored)**

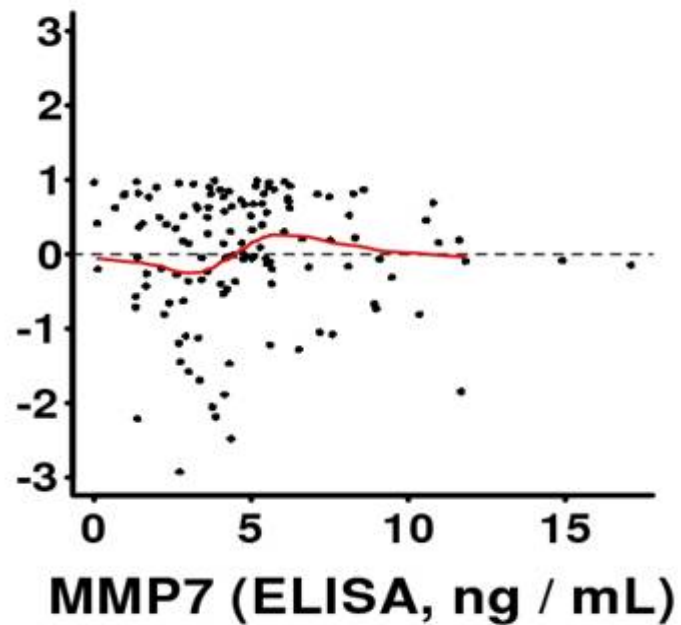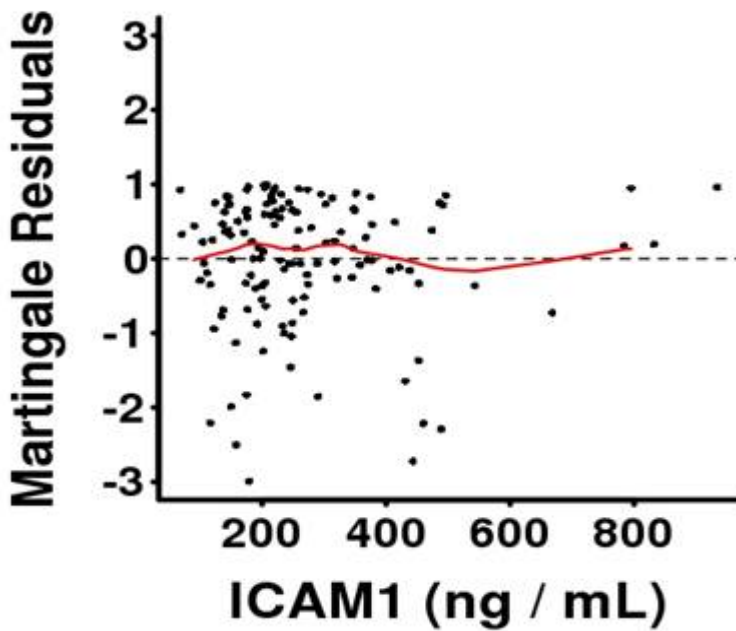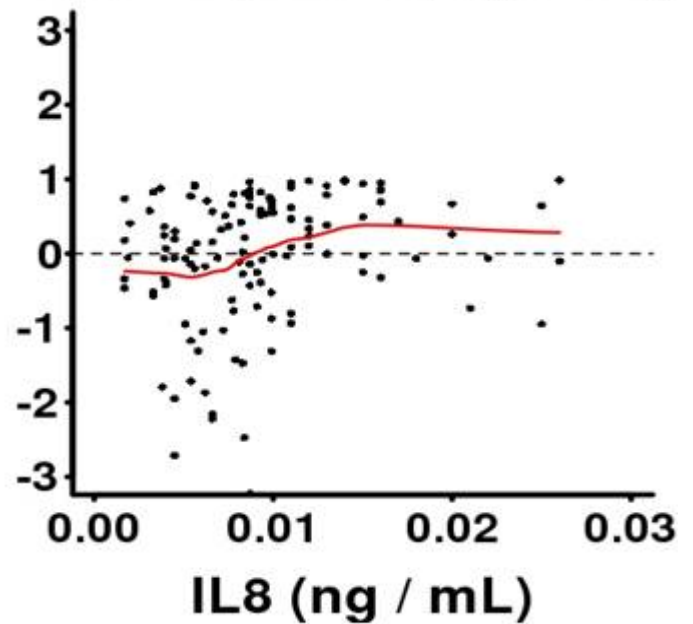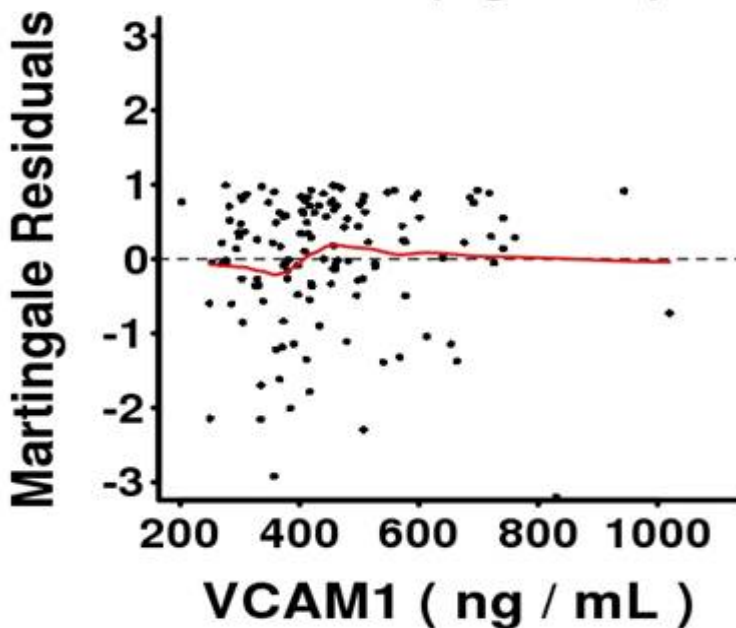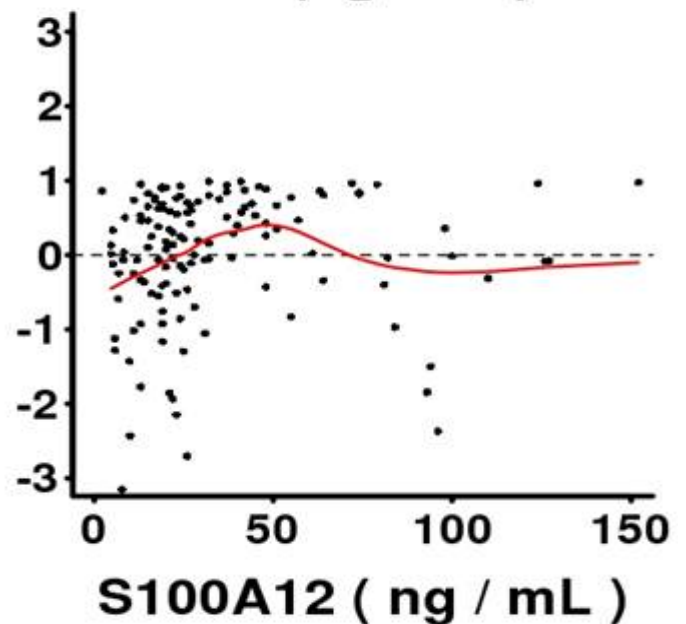

# Martingale residuals—Clinical Predictors

Cohort: **Derivation**

Outcome: **Progression Free Survival by DLCO  
(Lung Transplant is Censored)**

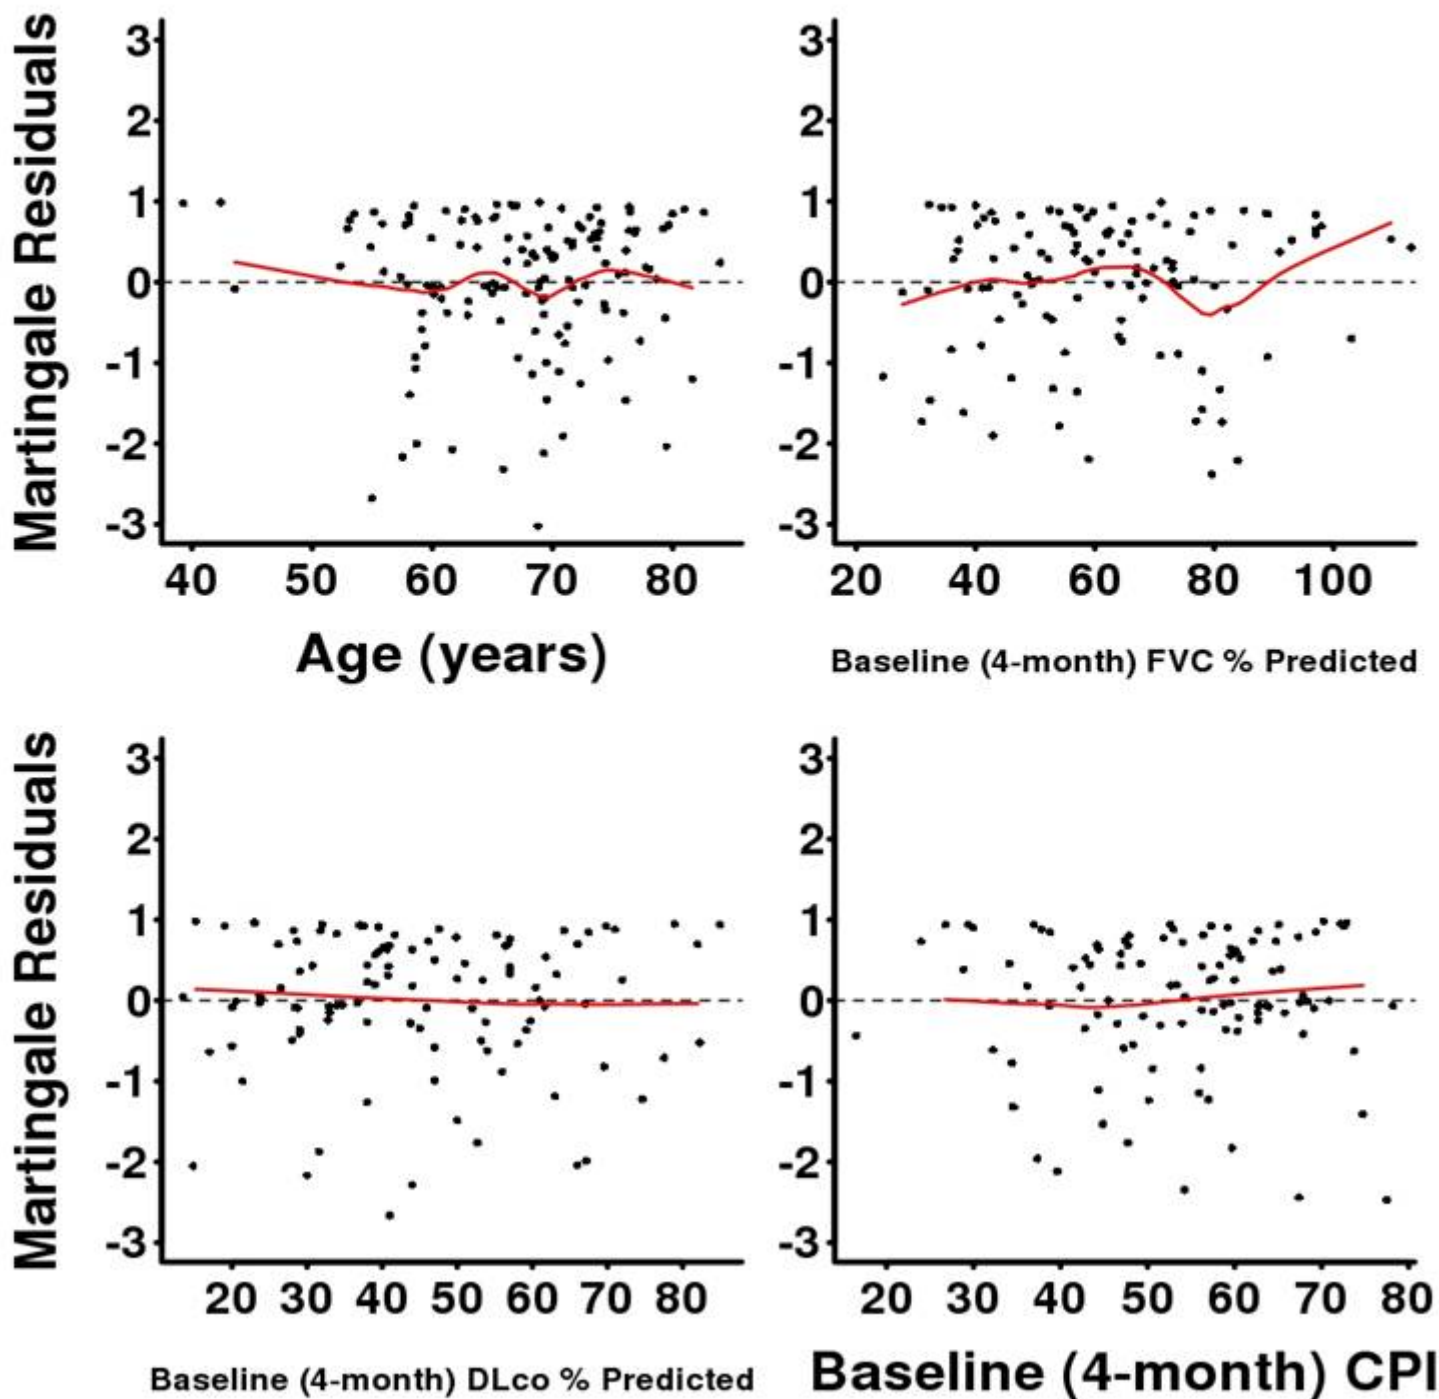

# Martingale residuals

—Biomarkers

Cohort: **Derivation**

Outcome: **Progression**

**Free Survival by DLCO  
(Lung Transplant is  
Censored)**

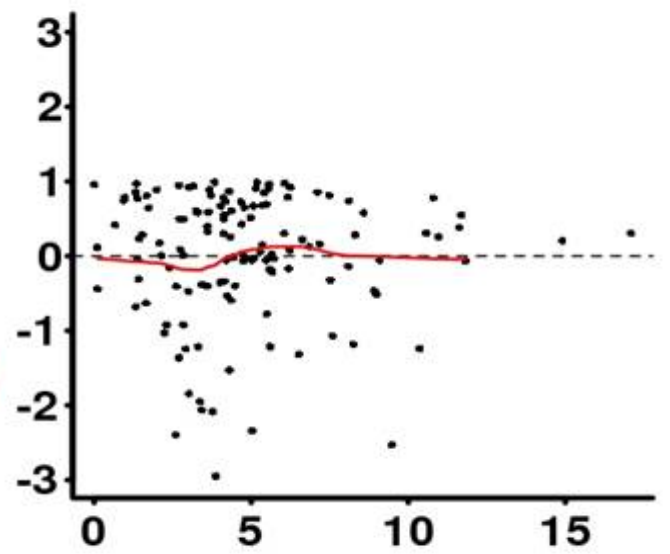

**MMP7 (ELISA, ng / mL)**

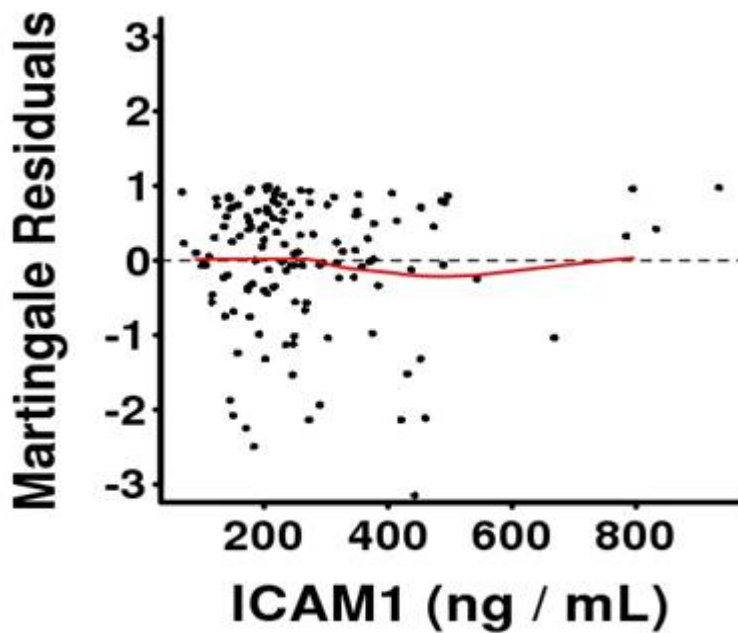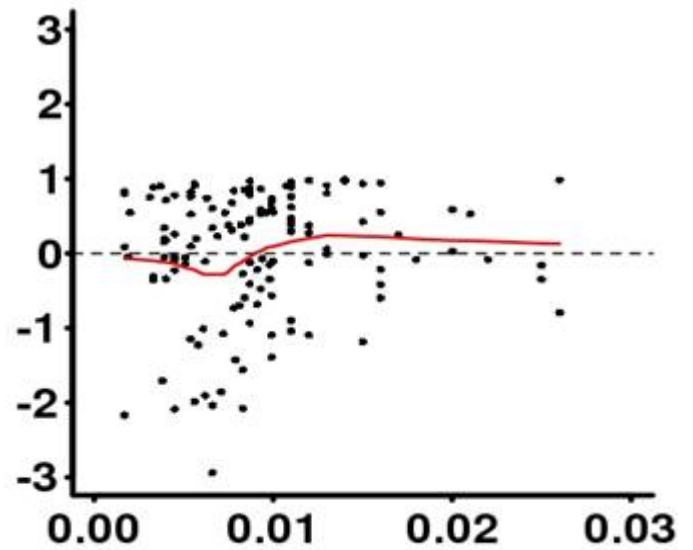

**IL8 (ng / mL)**

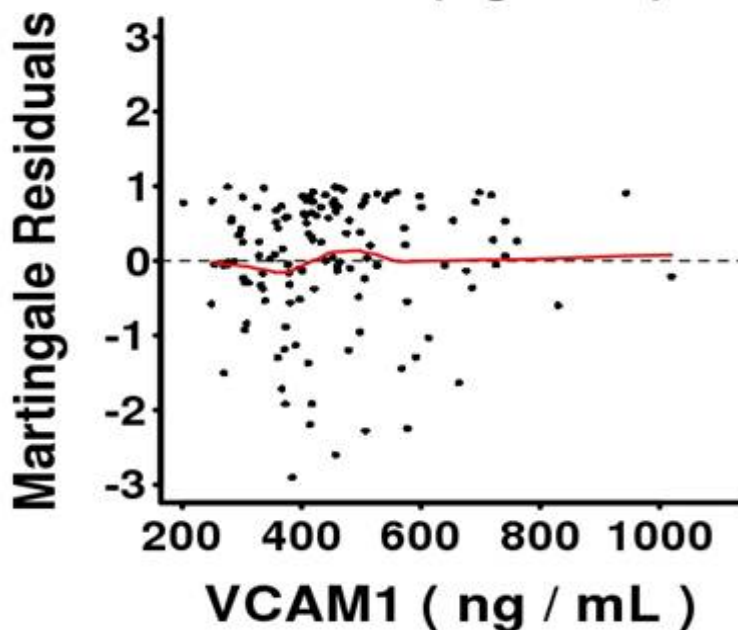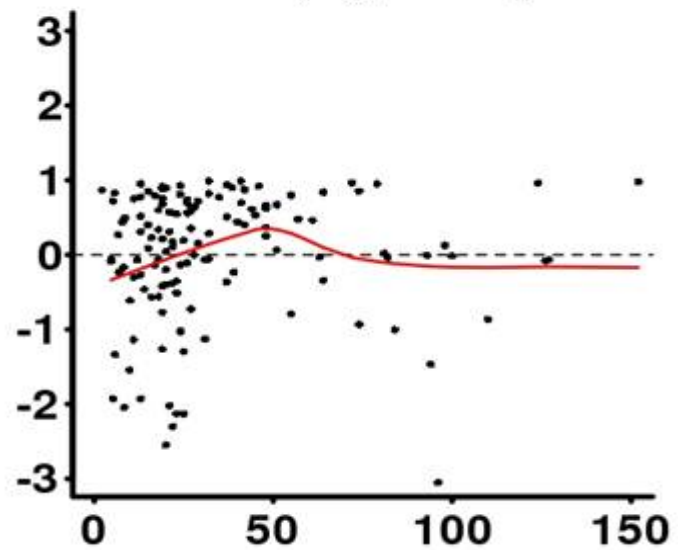

**S100A12 (ng / mL)**



# Martingale residuals—Clinical Predictors

Cohort: **Derivation**

Outcome: **Progression Free Survival by CPI  
(Lung Transplant is Censored)**

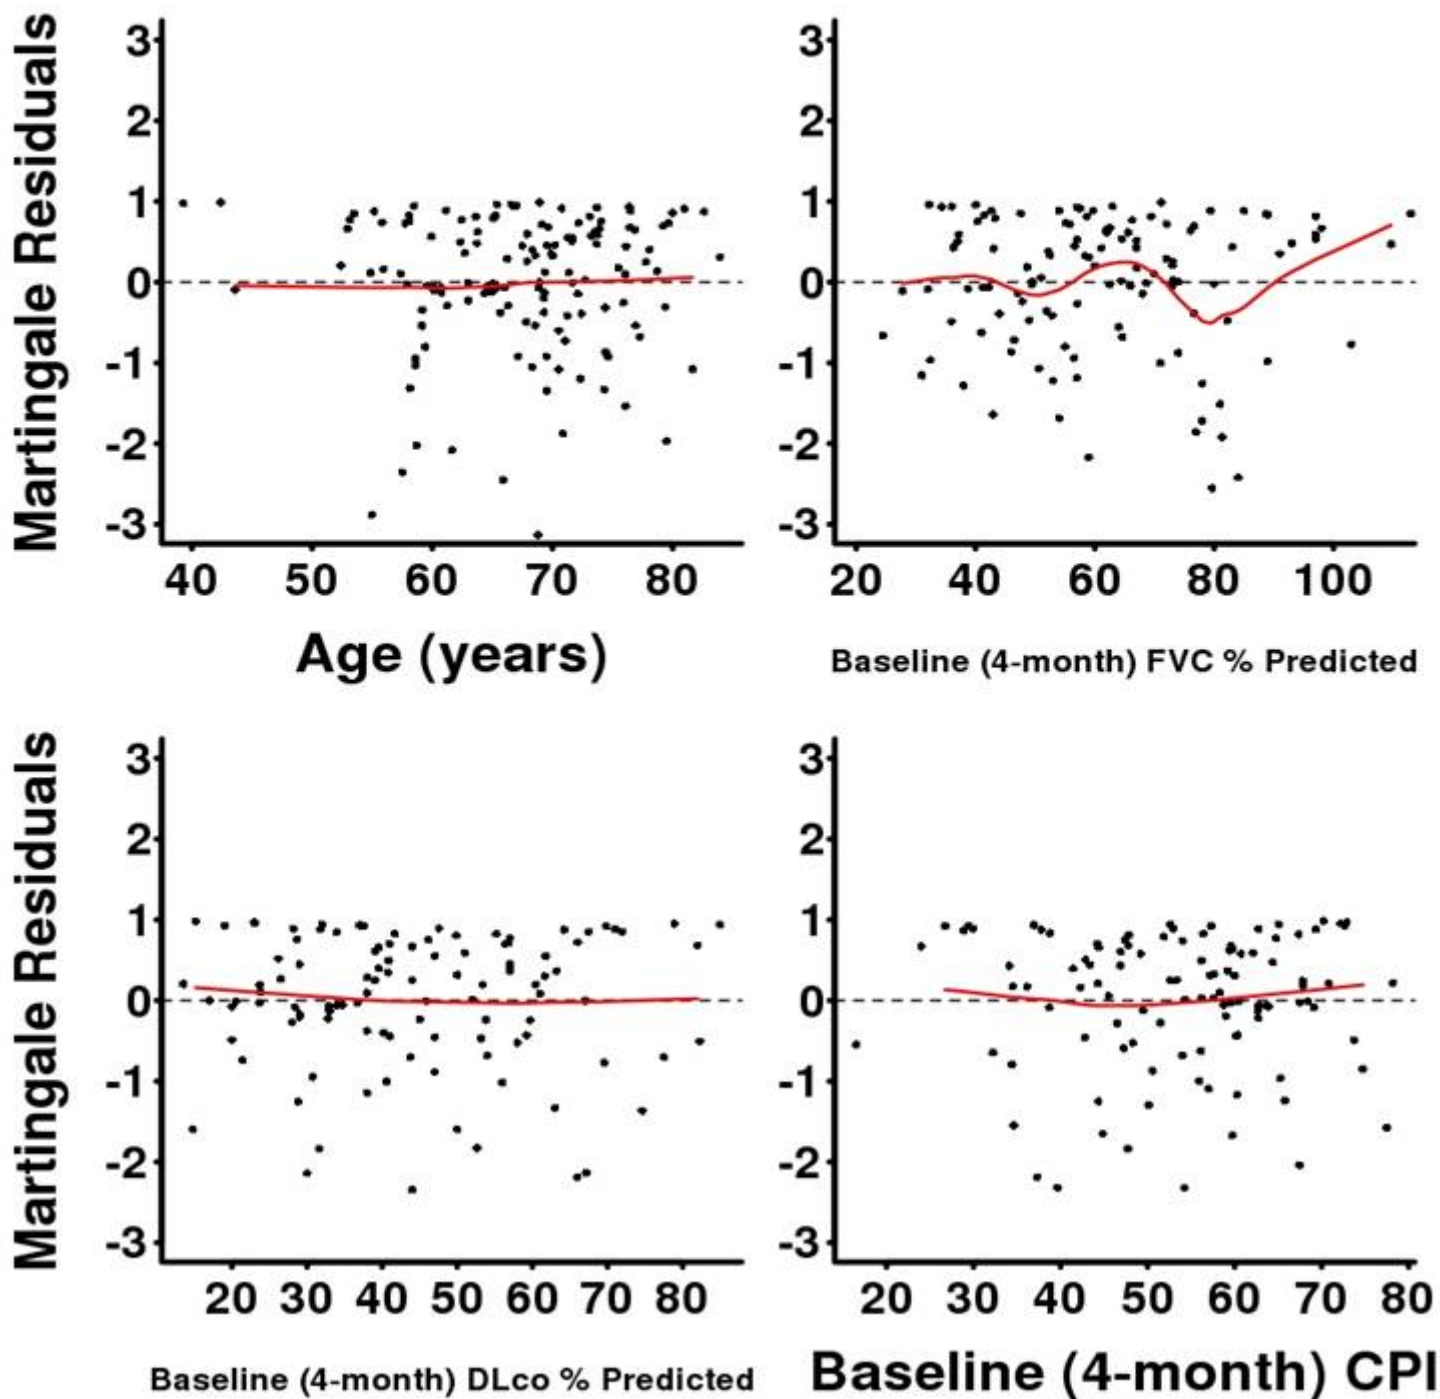

# Martingale residuals

—Biomarkers

Cohort: **Derivation**

Outcome: **Progression**

**Free Survival by CPI  
(Lung Transplant is  
Censored)**

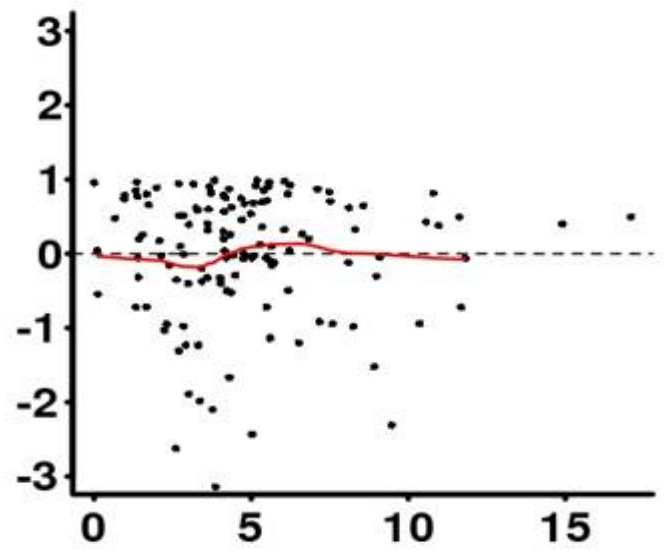

**MMP7 (ELISA, ng / mL)**

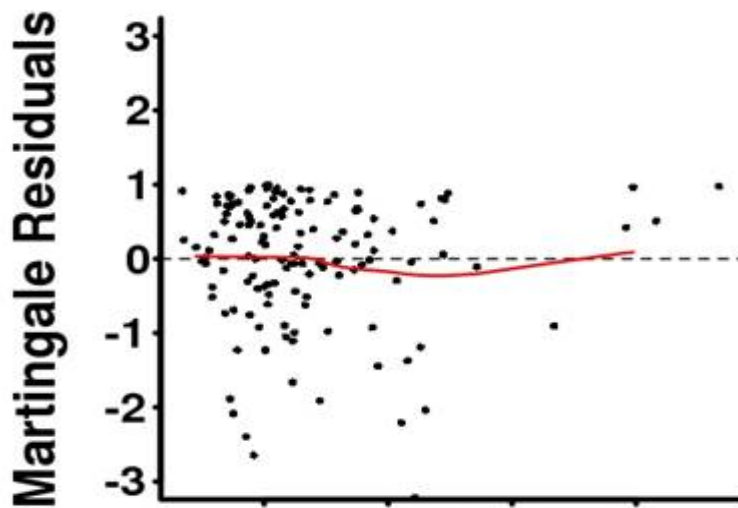

**ICAM1 (ng / mL)**

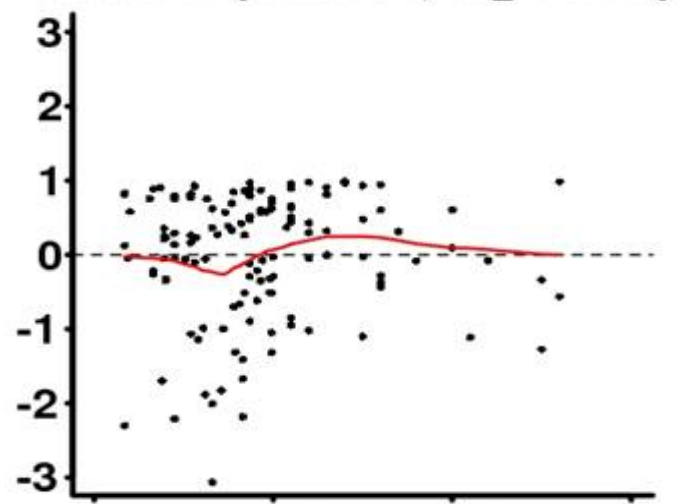

**IL8 (ng / mL)**

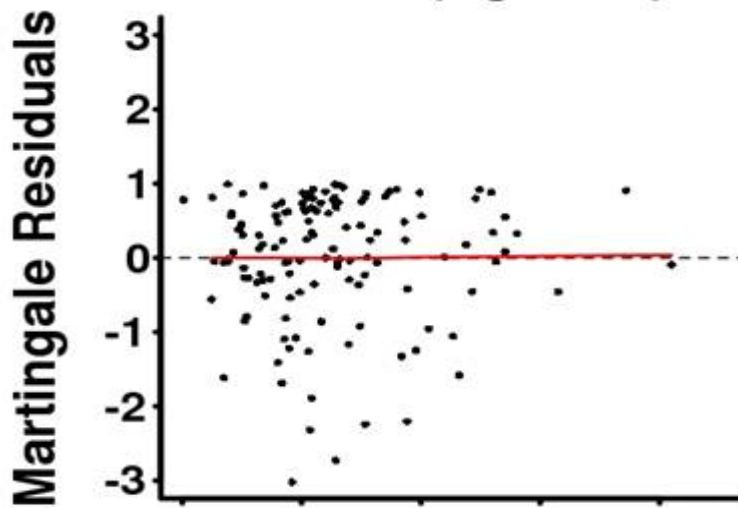

**VCAM1 (ng / mL)**

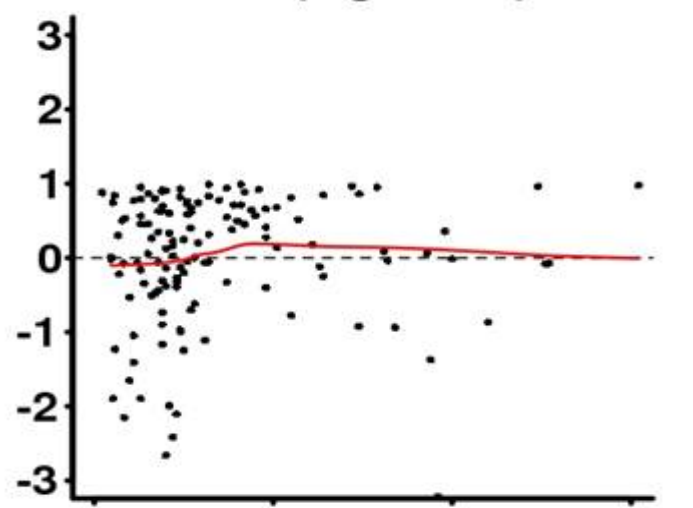

**S100A12 (ng / mL)**

# Martingale residuals—Clinical Predictors

Cohort: **Derivation**

Outcome: **Progression Free Survival by FVC  
(Lung Transplant counts as event)**

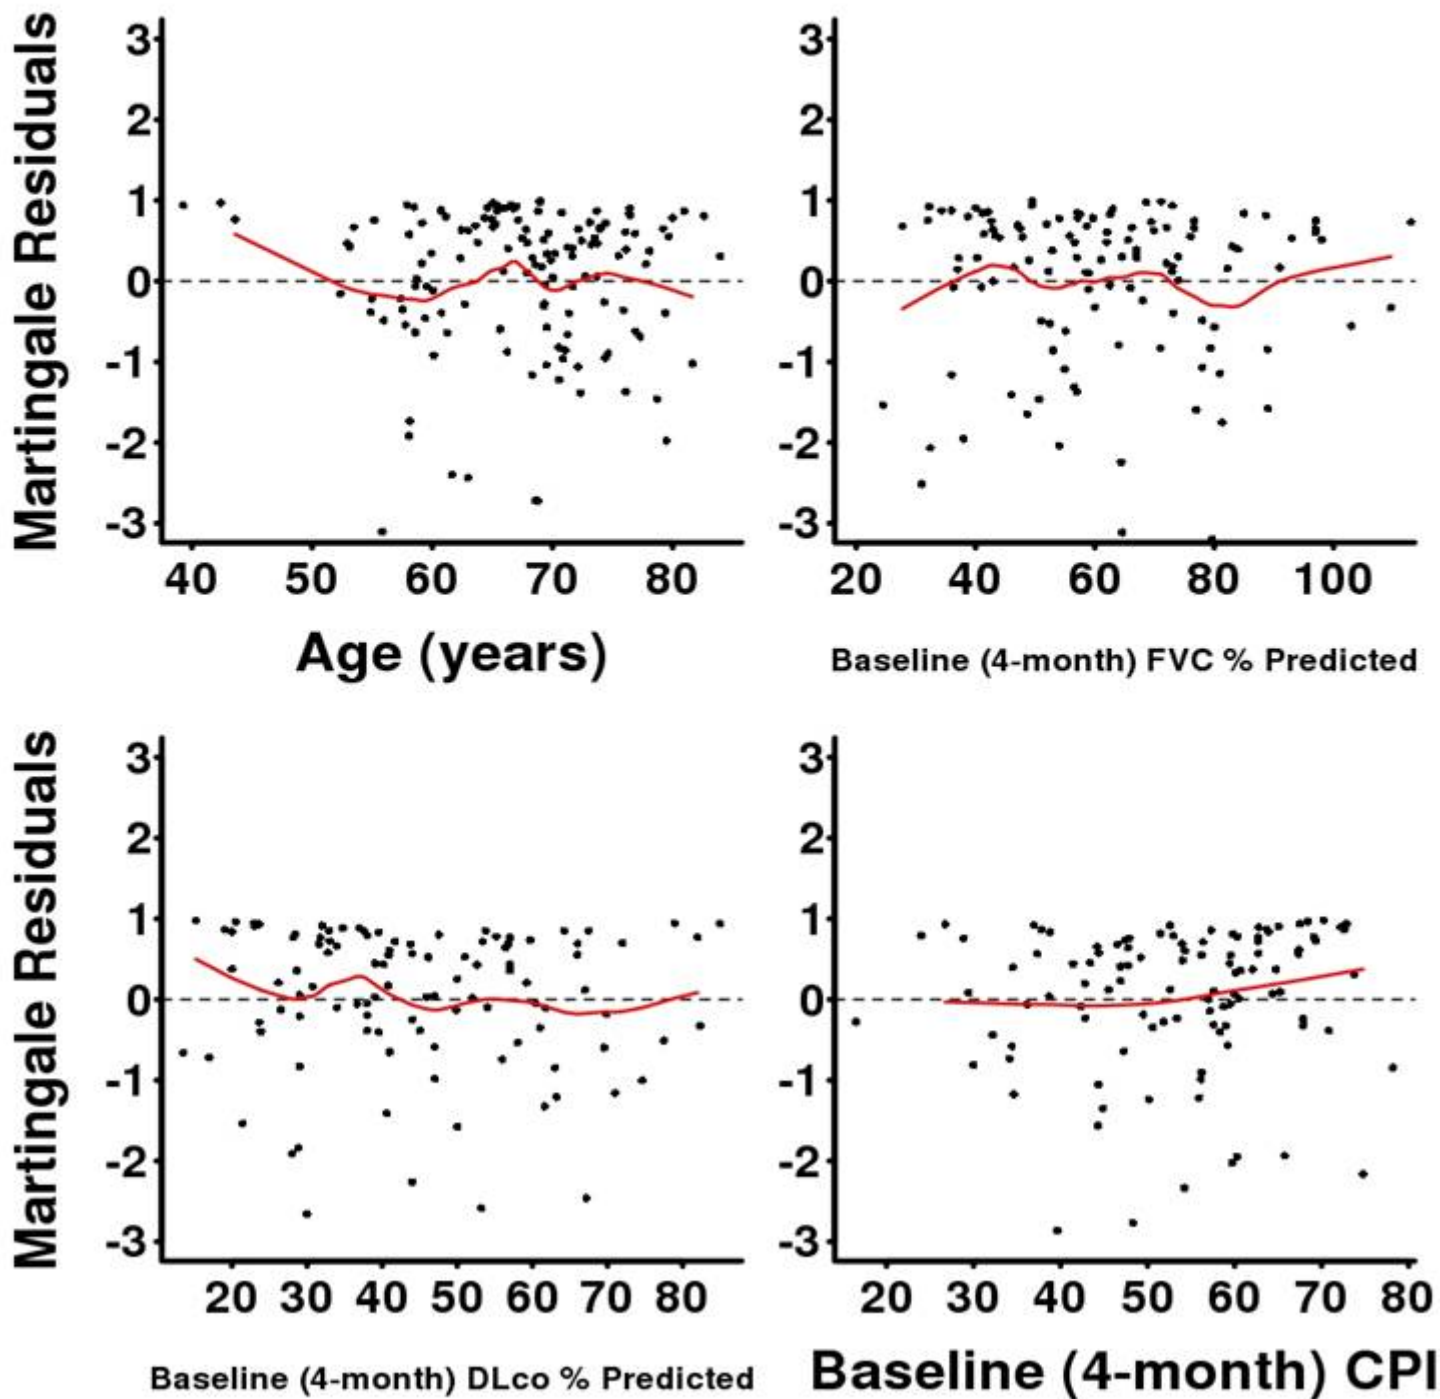

# Martingale residuals

—Biomarkers

Cohort: **Derivation**

Outcome: **Progression**

**Free Survival by FVC  
(Lung Transplant  
counts as event)**

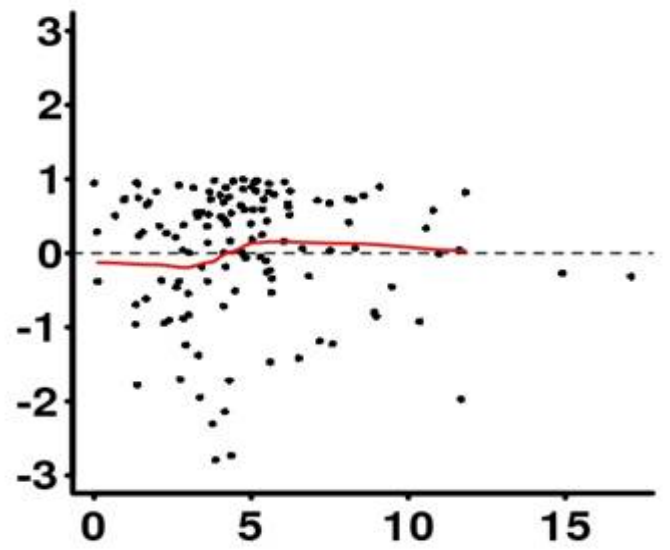

**MMP7 (ELISA, ng / mL)**

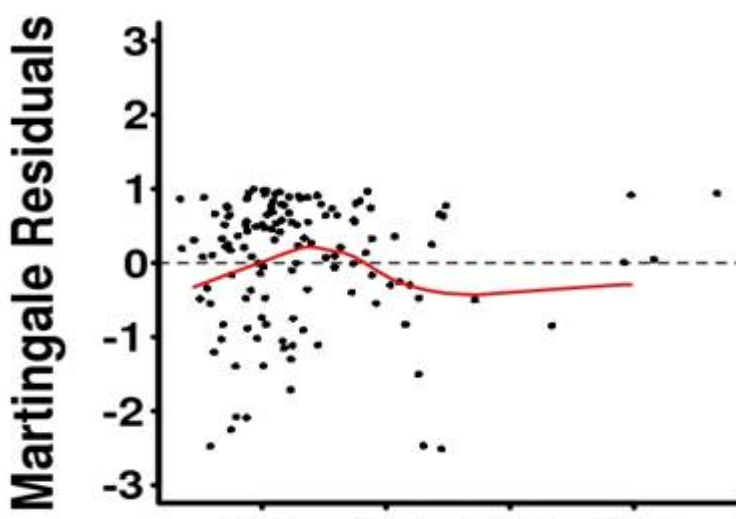

**ICAM1 (ng / mL)**

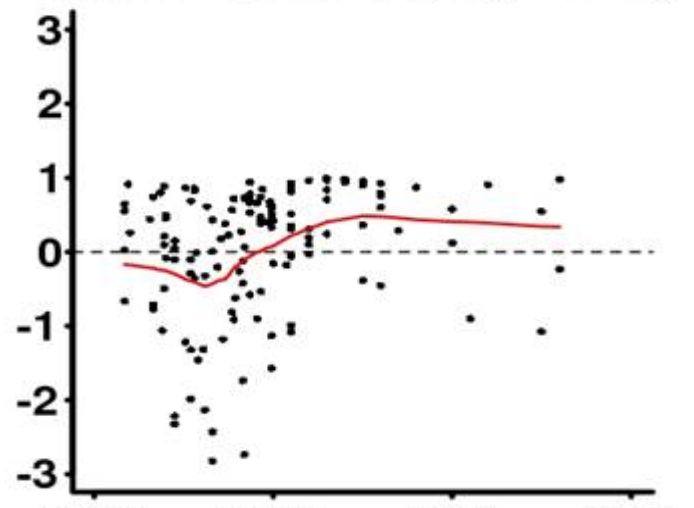

**IL8 (ng / mL)**

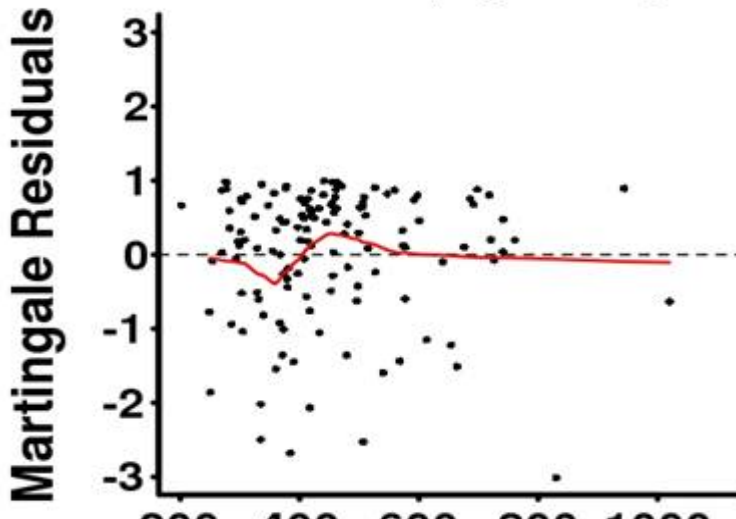

**VCAM1 (ng / mL)**

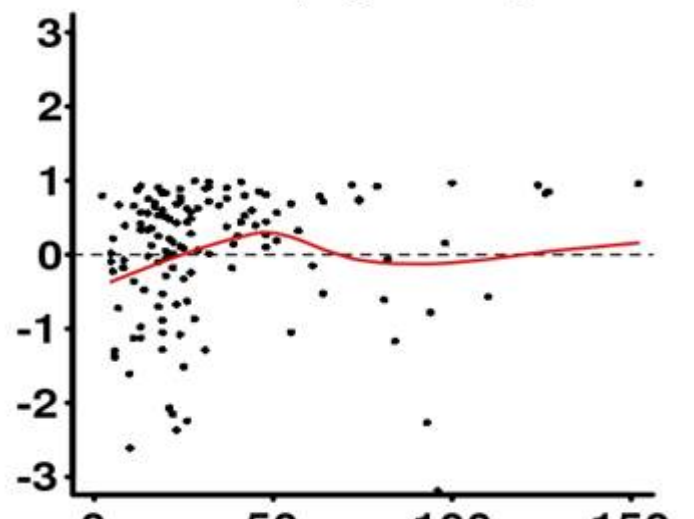

**S100A12 (ng / mL)**

# Martingale residuals—Clinical Predictors

Cohort: **Derivation**

Outcome: **Progression Free Survival by DLCO  
(Lung Transplant counts as event)**

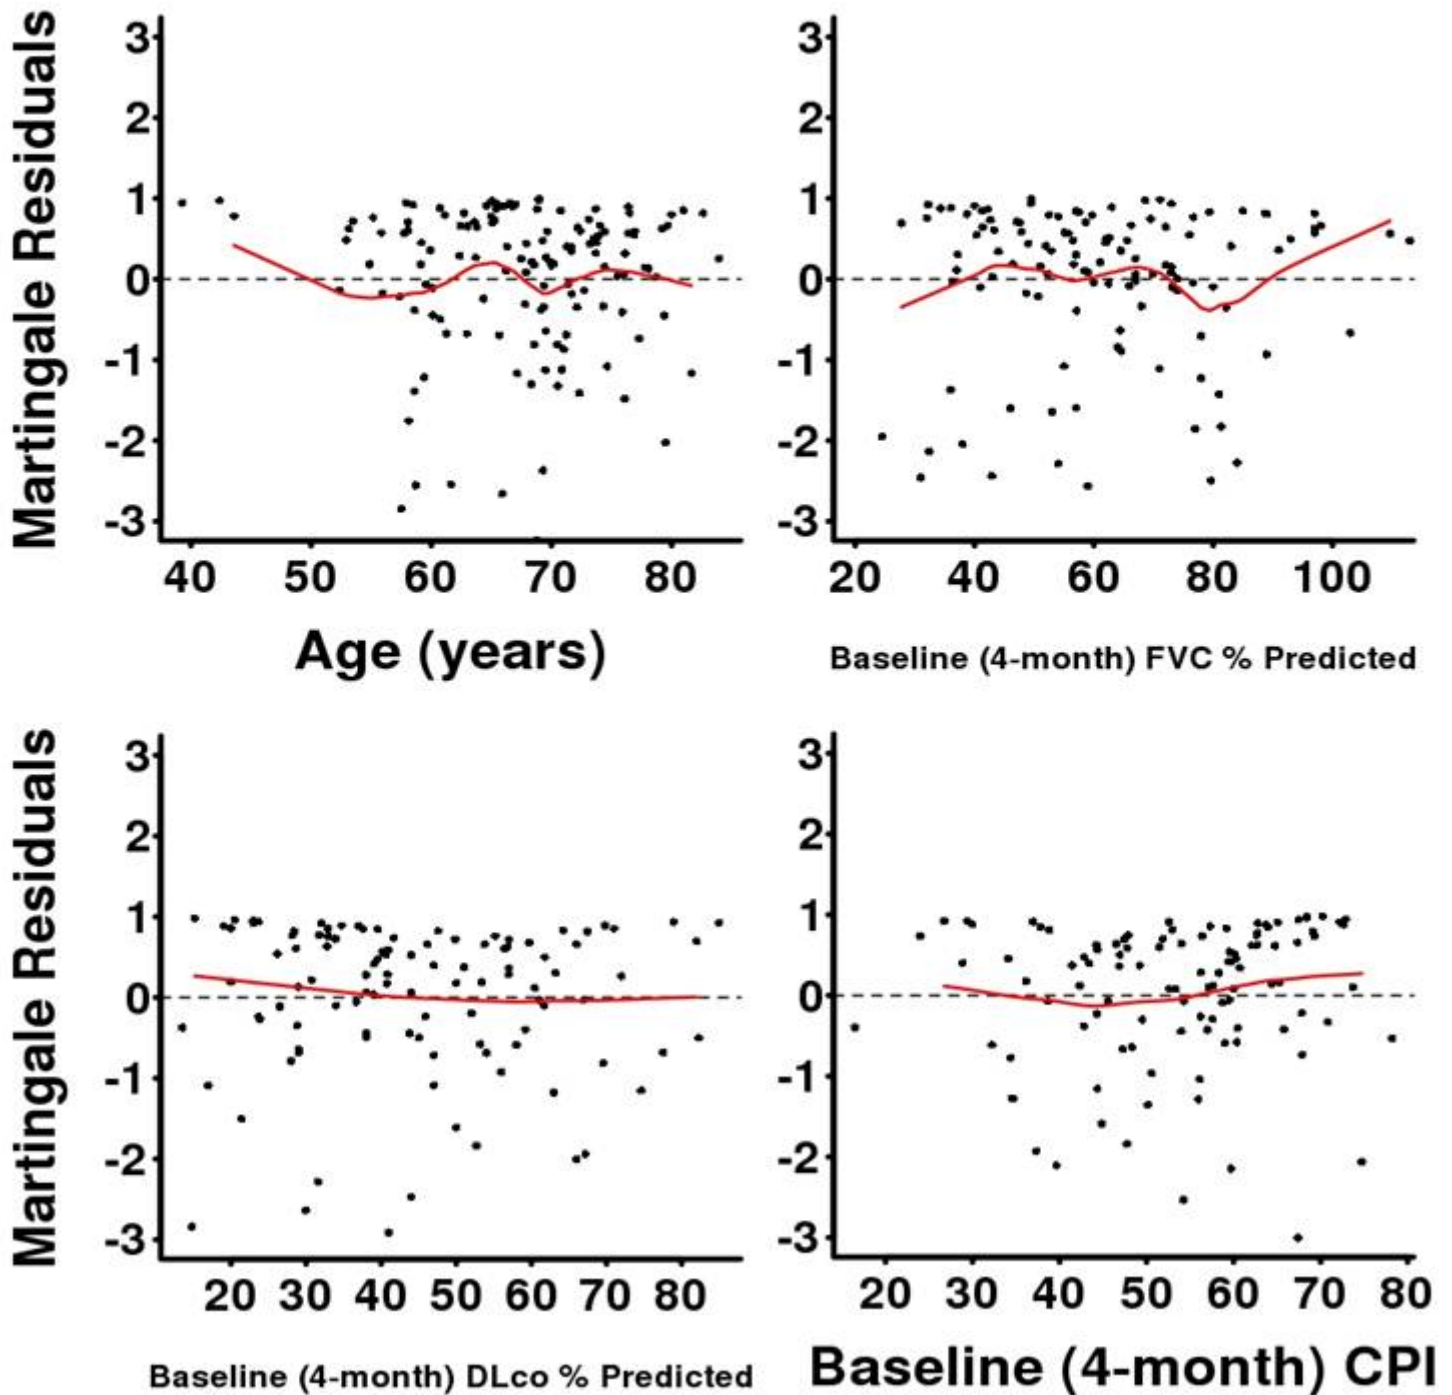

# Martingale residuals

—Biomarkers

Cohort: **Derivation**

Outcome: **Progression**

**Free Survival by DLCO  
(Lung Transplant  
counts as event)**

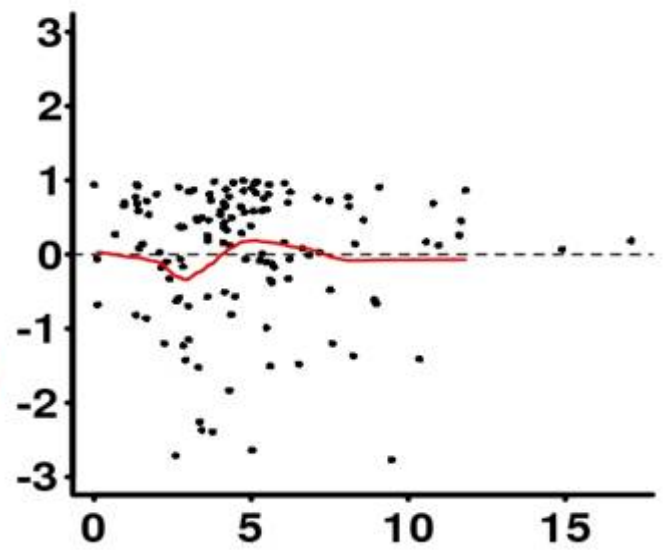

**MMP7 (ELISA, ng / mL)**

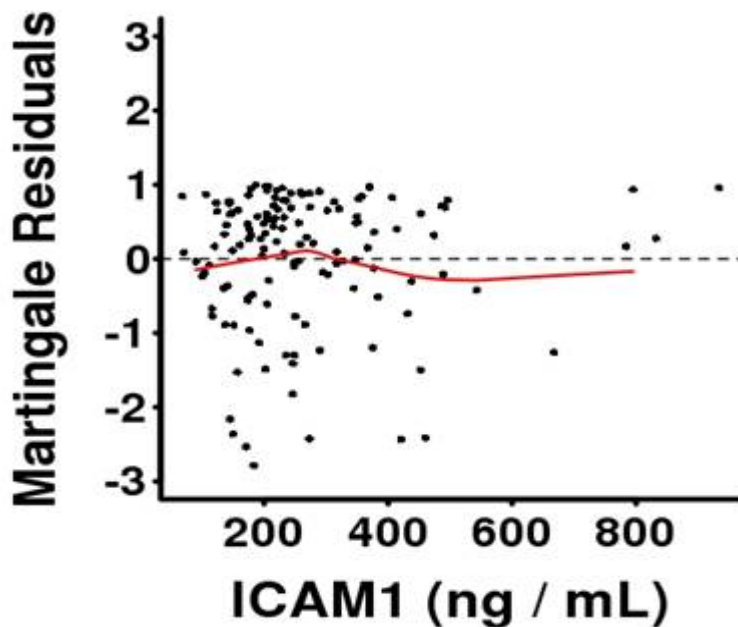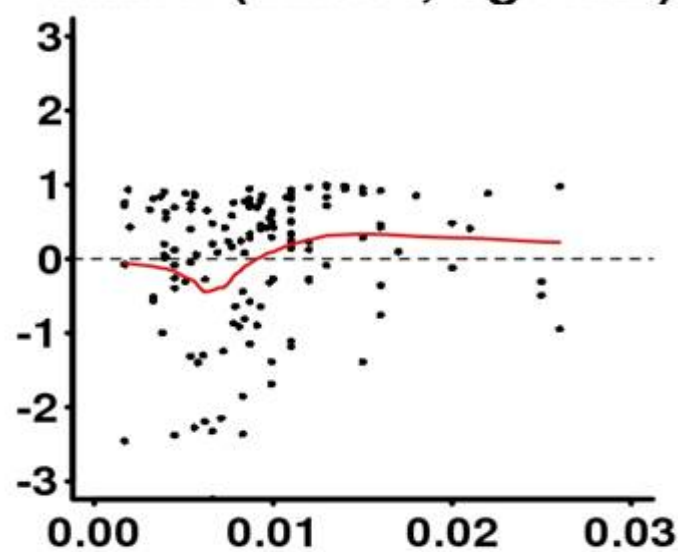

**IL8 (ng / mL)**

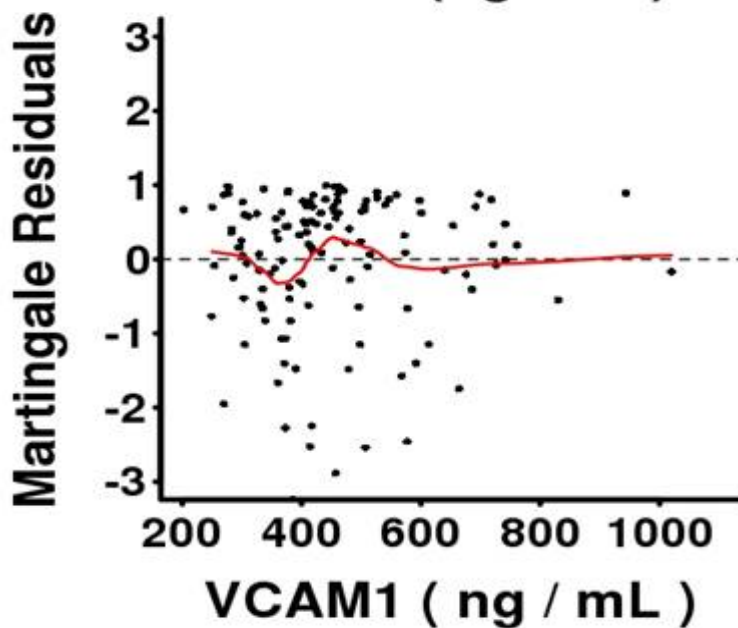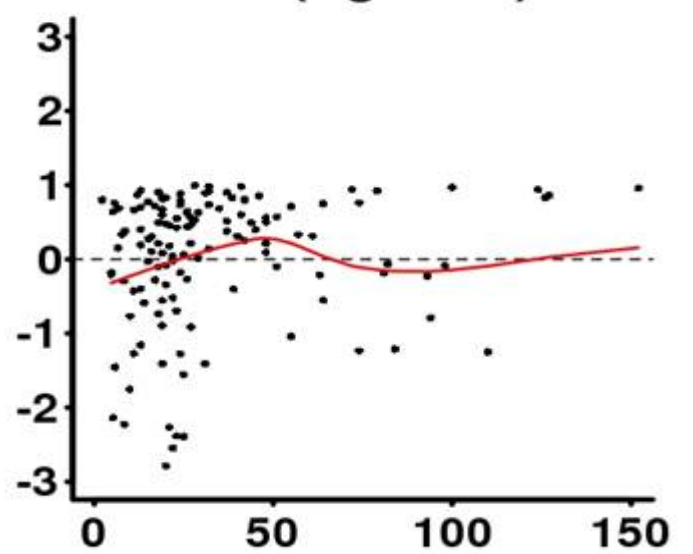

**S100A12 (ng / mL)**

# Martingale residuals—Clinical Predictors

Cohort: **Derivation**

Outcome: **Progression Free Survival by CPI  
(Lung Transplant counts as event)**

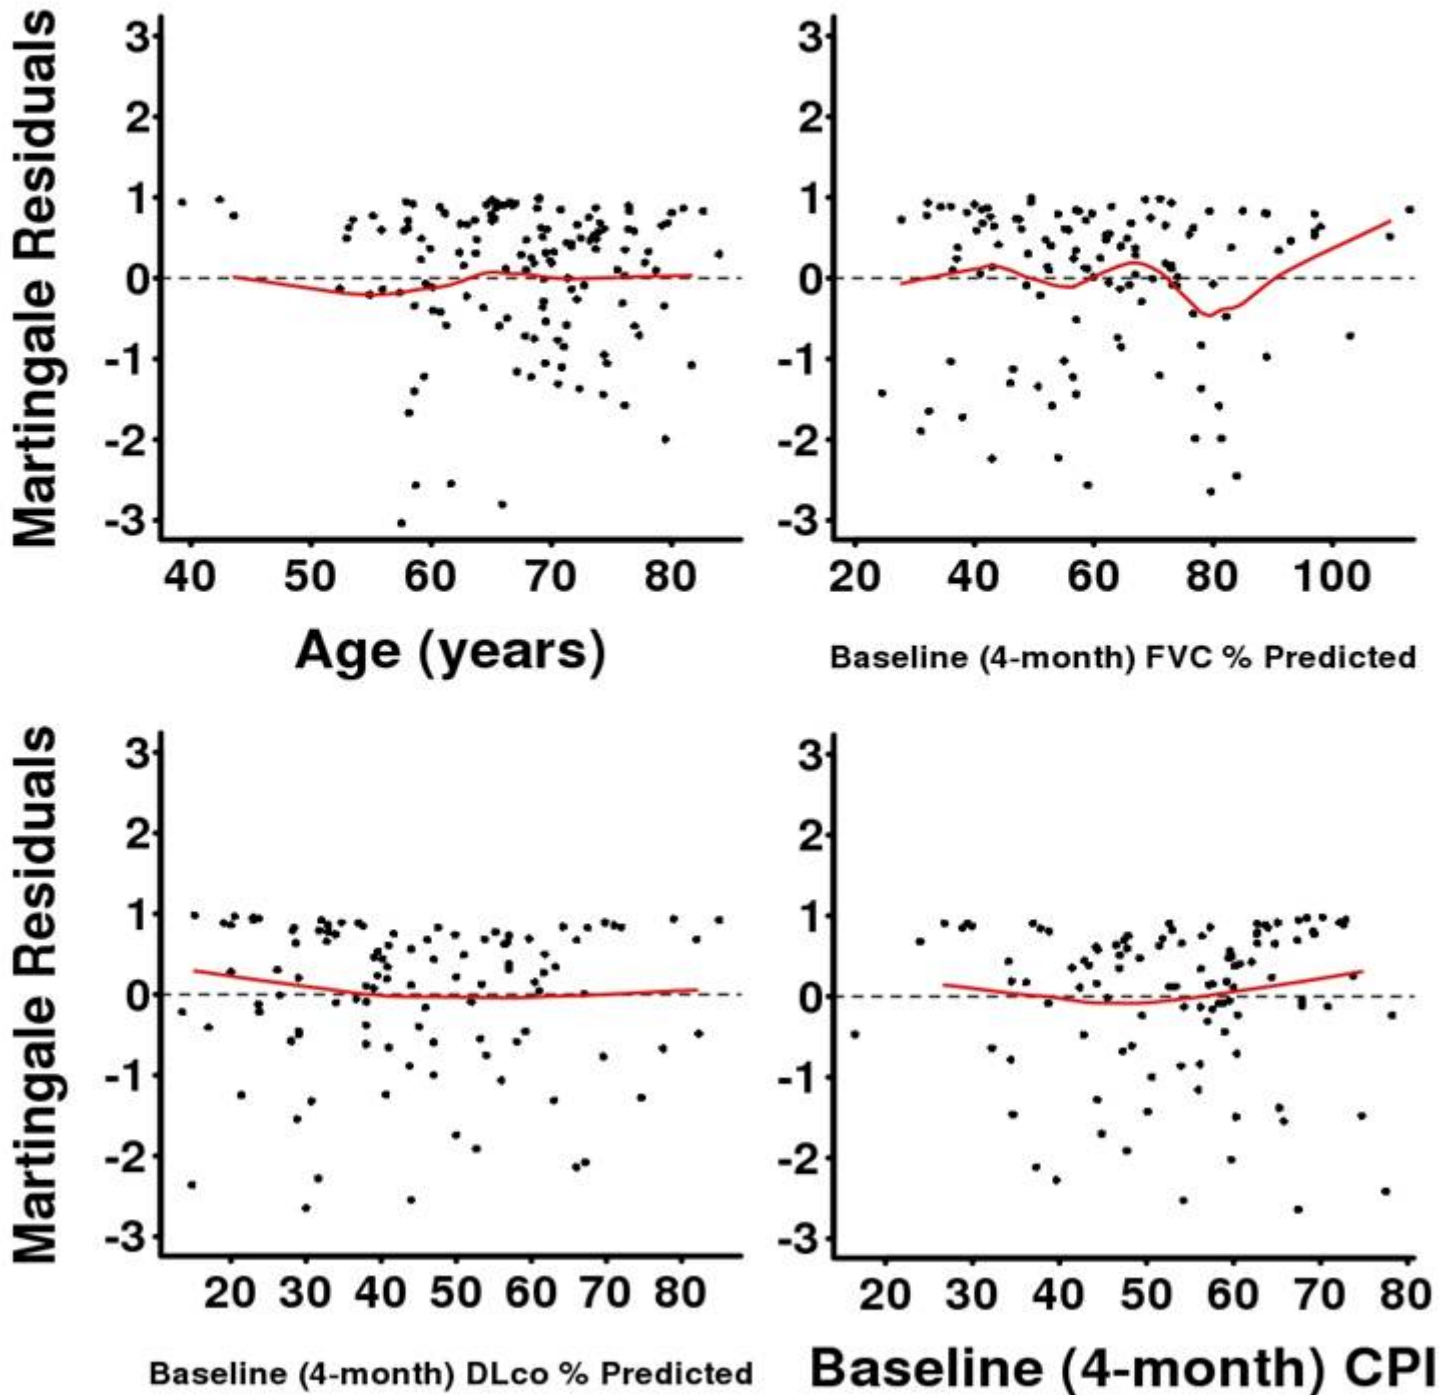

# Martingale residuals

—Biomarkers

Cohort: **Derivation**

Outcome: **Progression**

**Free Survival by CPI  
(Lung Transplant  
counts as event)**

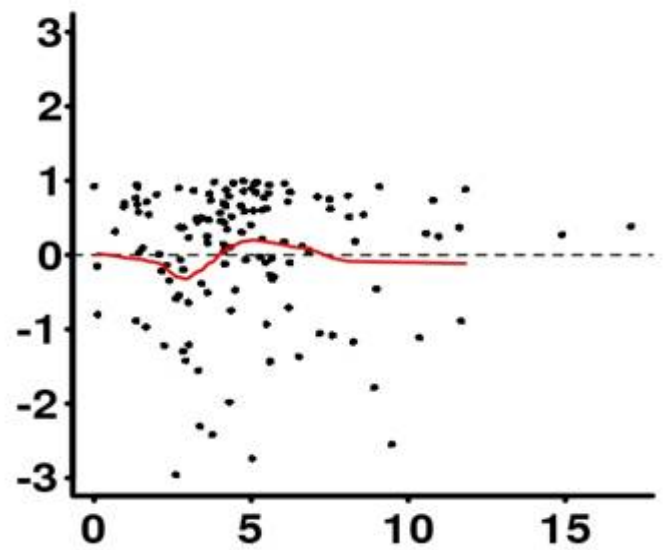

**MMP7 (ELISA, ng / mL)**

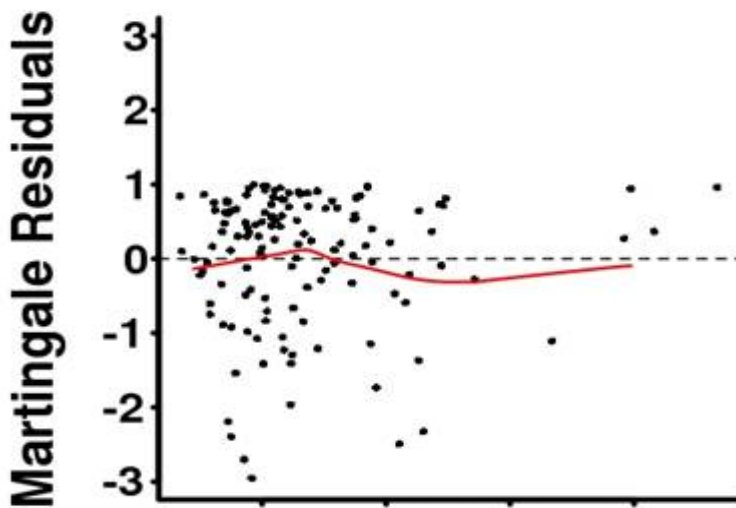

**ICAM1 (ng / mL)**

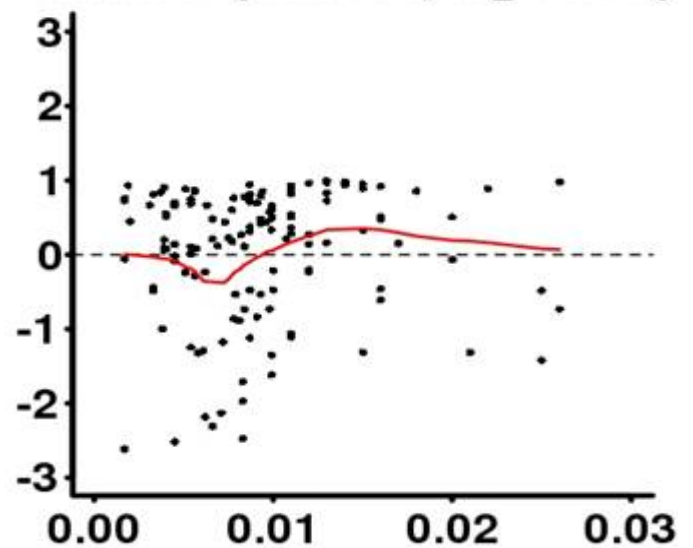

**IL8 (ng / mL)**

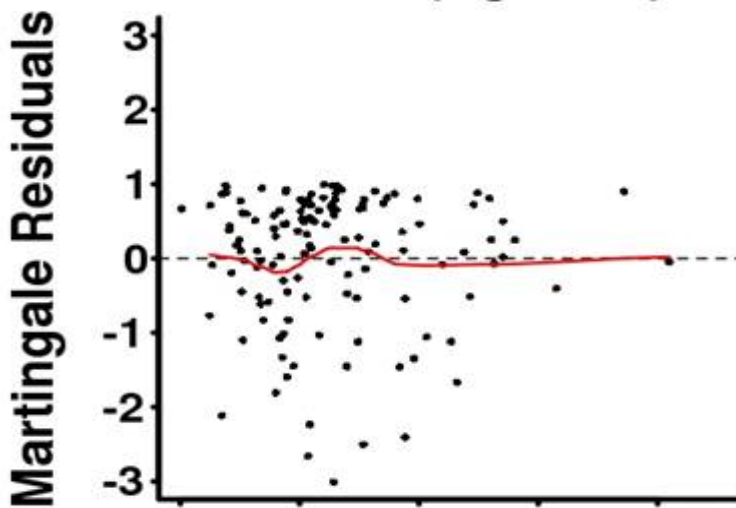

**VCAM1 (ng / mL)**

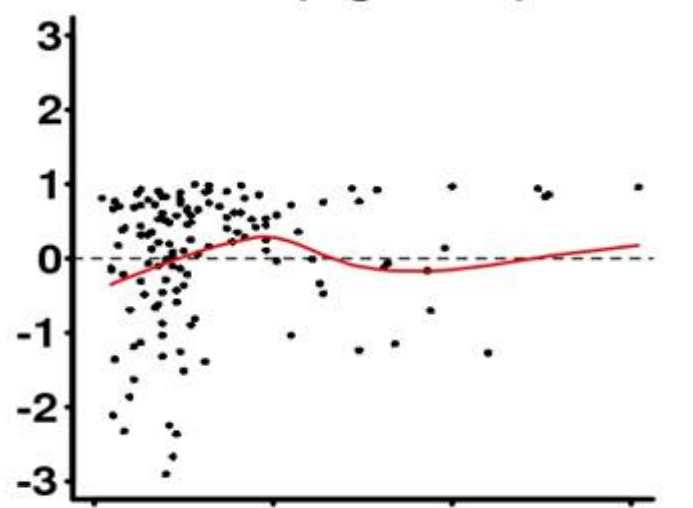

**S100A12 (ng / mL)**



# Martingale residuals—Clinical Predictors

Cohort: **Validation**

Outcome: **Mortality**

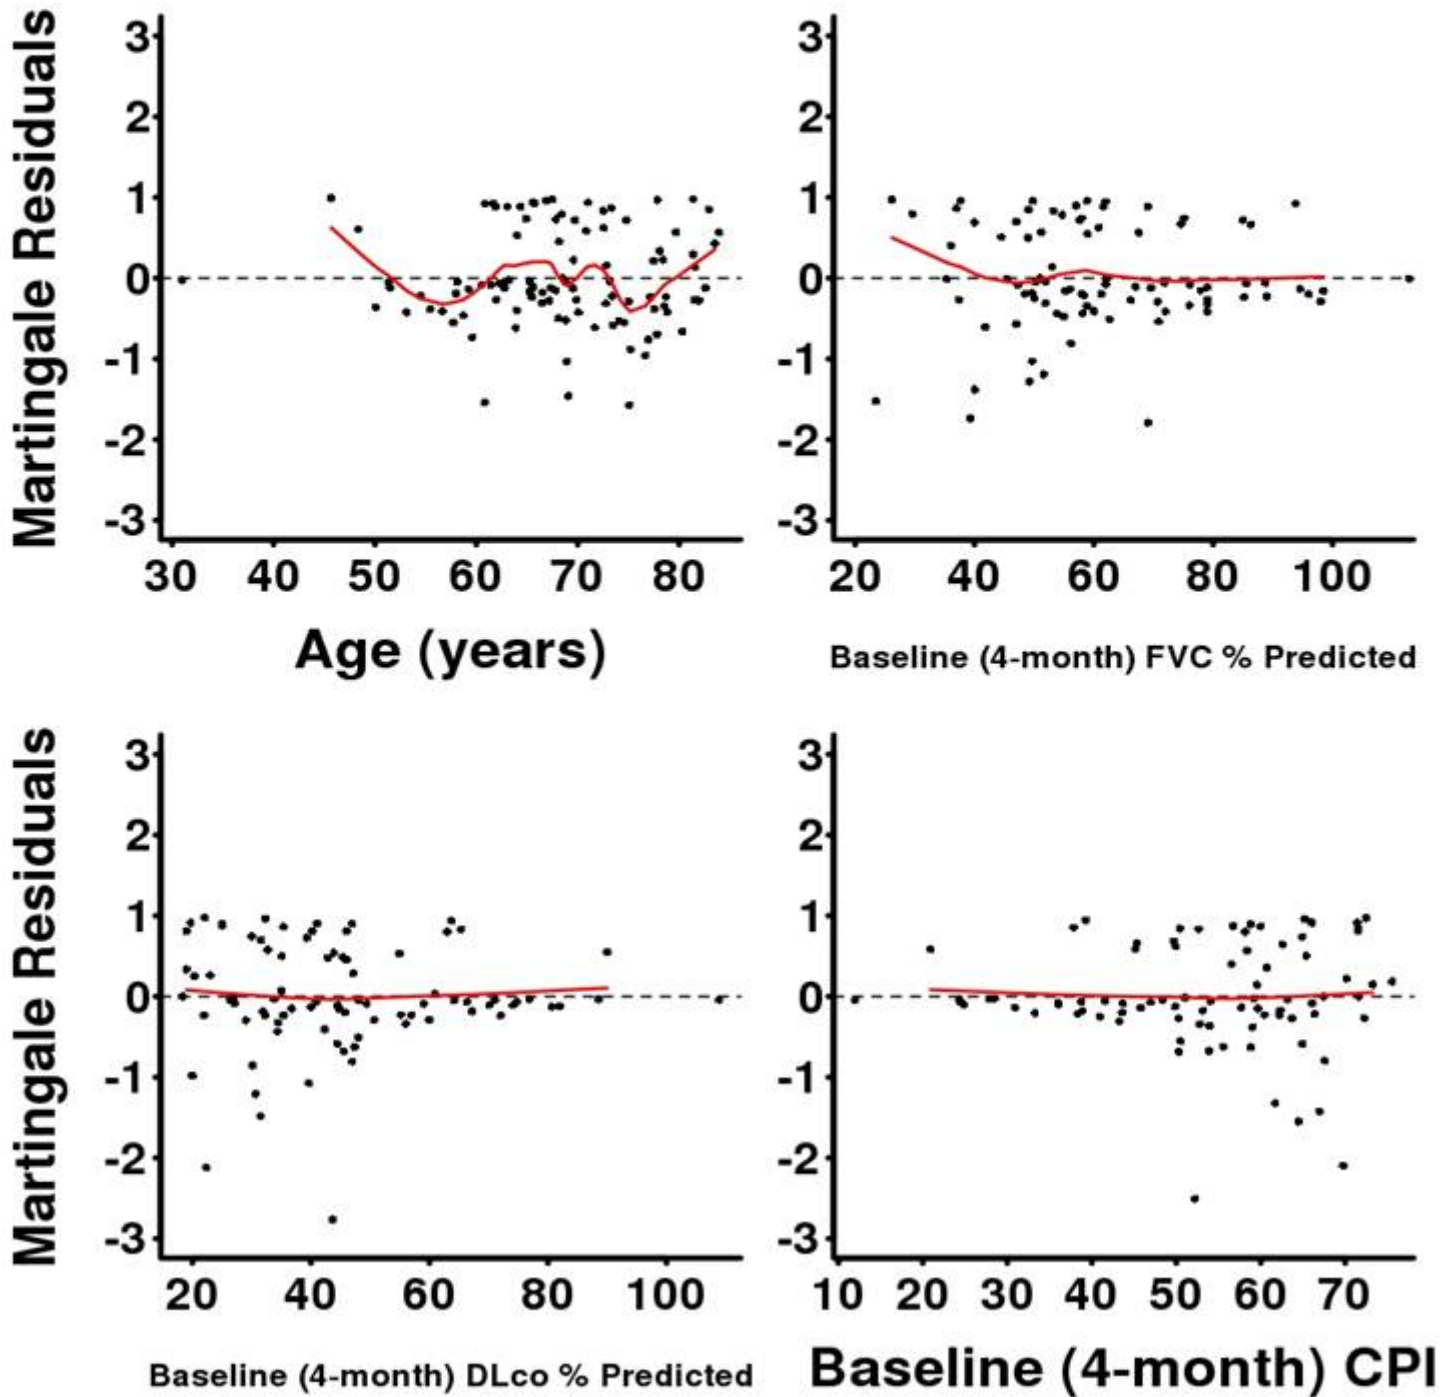

Martingale residuals  
—Biomarkers  
Cohort: **Validation**  
Outcome: **Mortality**

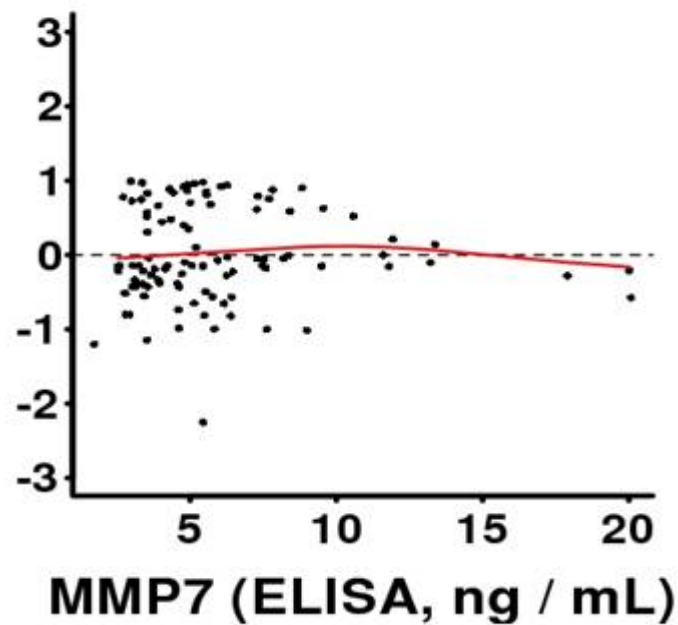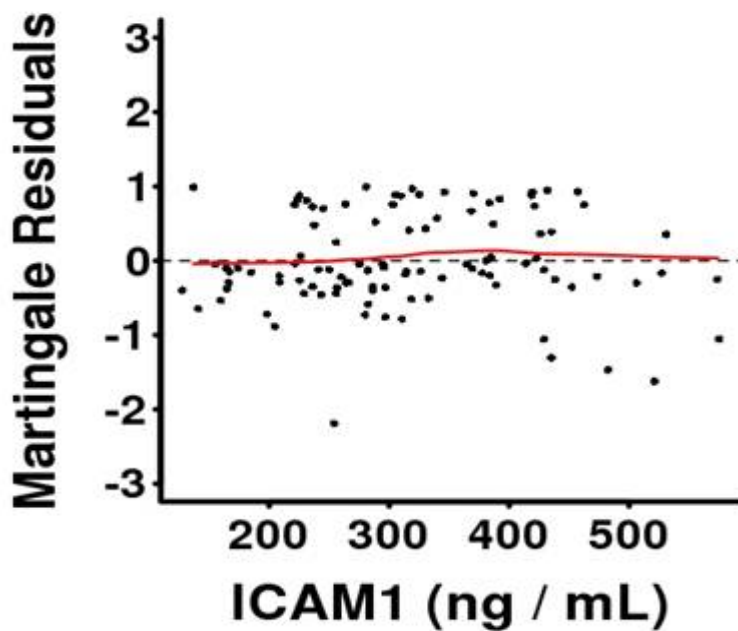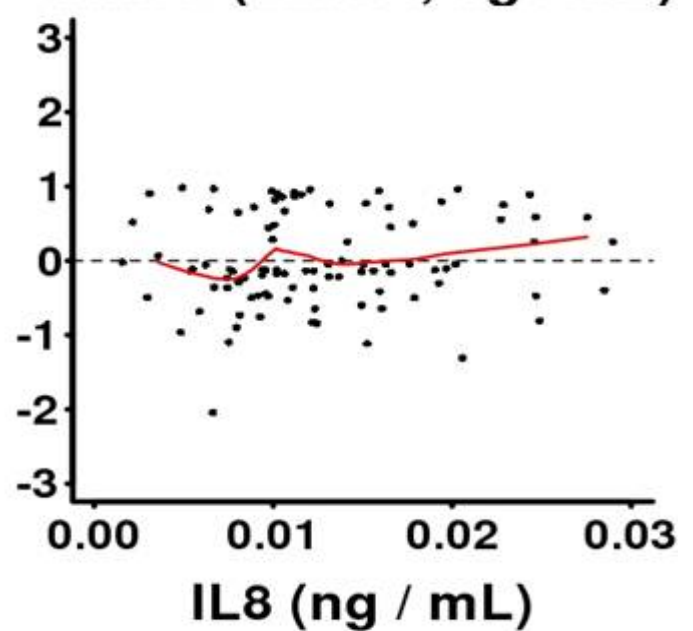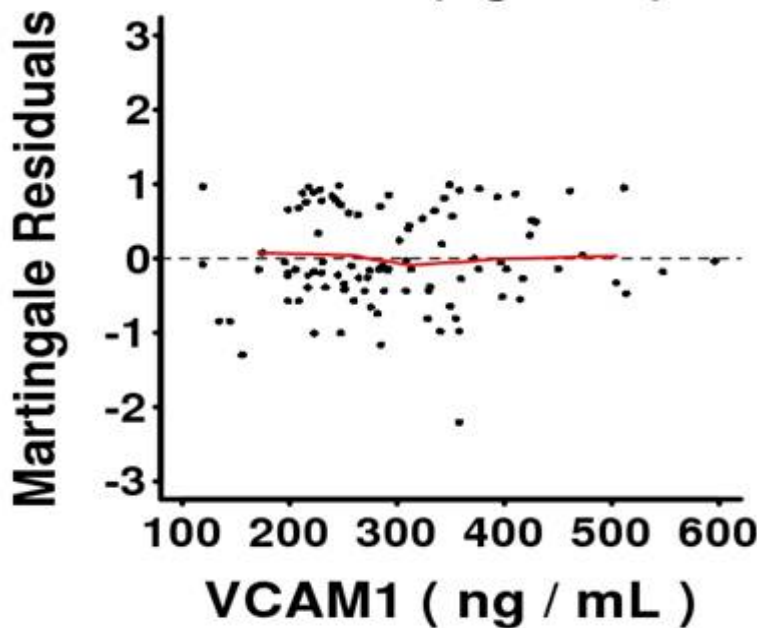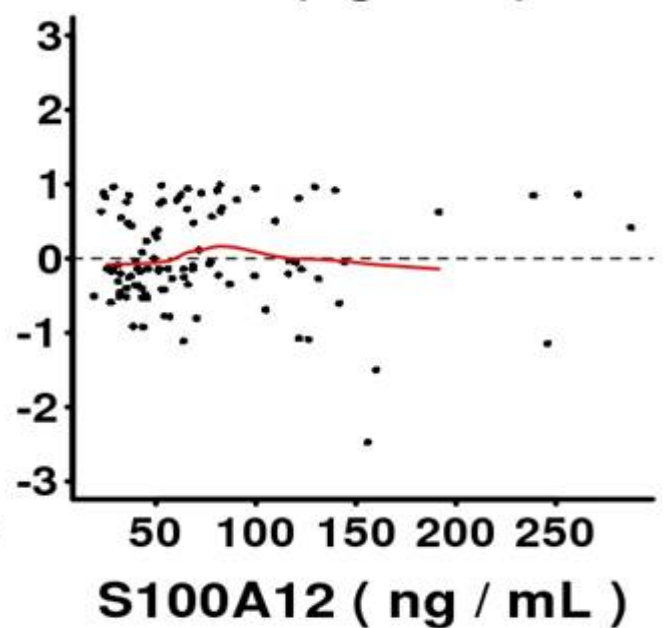

# Martingale residuals—Clinical Predictors

Cohort: **Validation**

Outcome: **Transplant Free Survival**

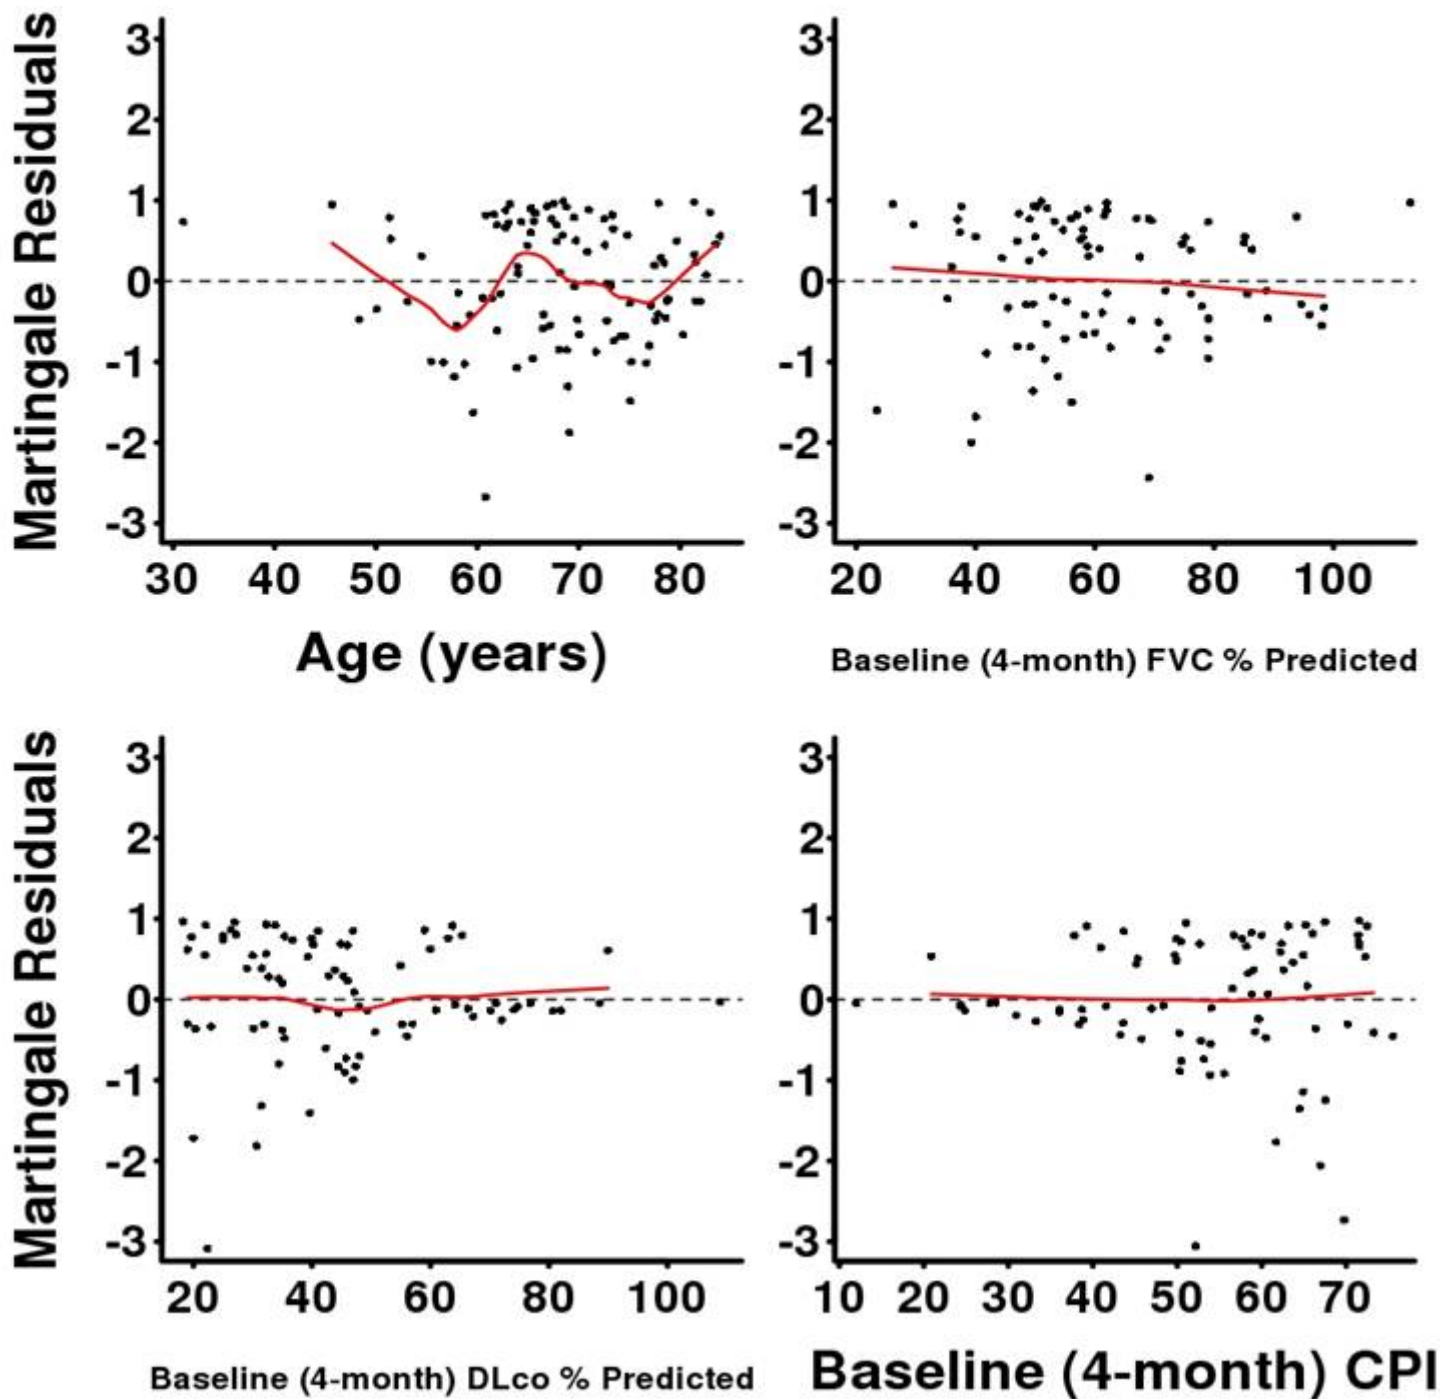

# Martingale residuals

—Biomarkers

Cohort: **Validation**

Outcome: **Transplant  
Free Survival**

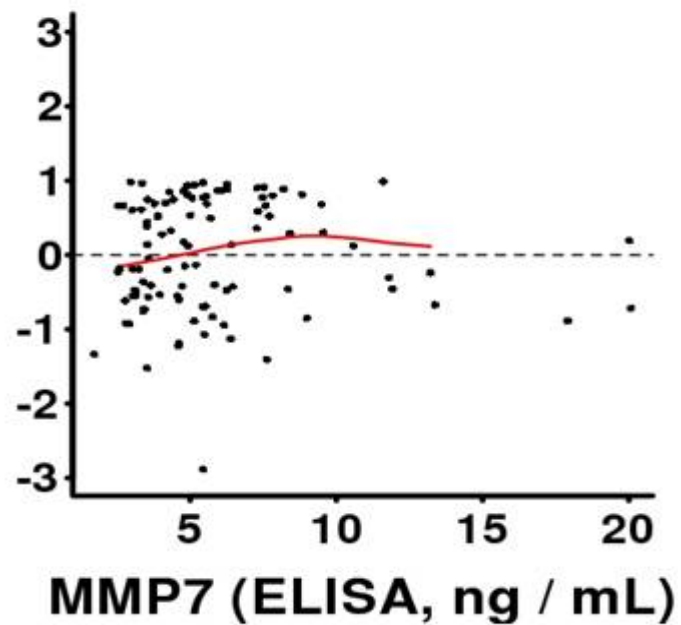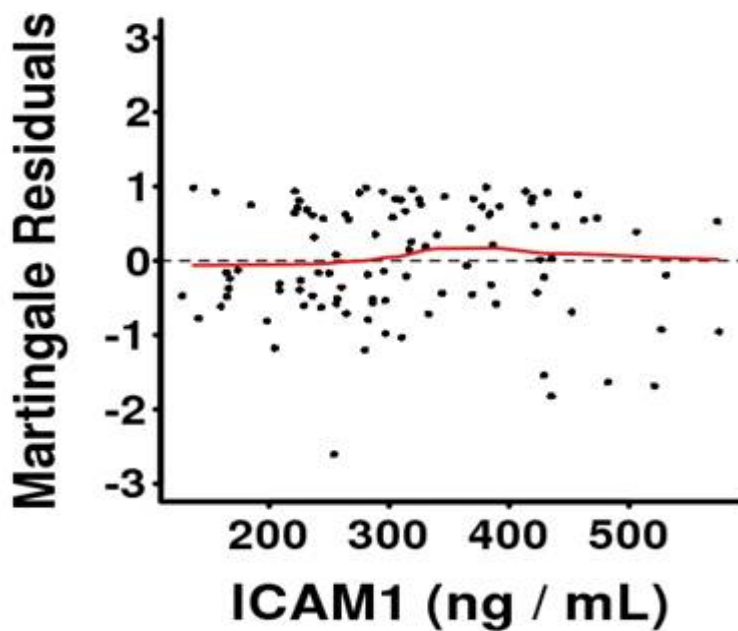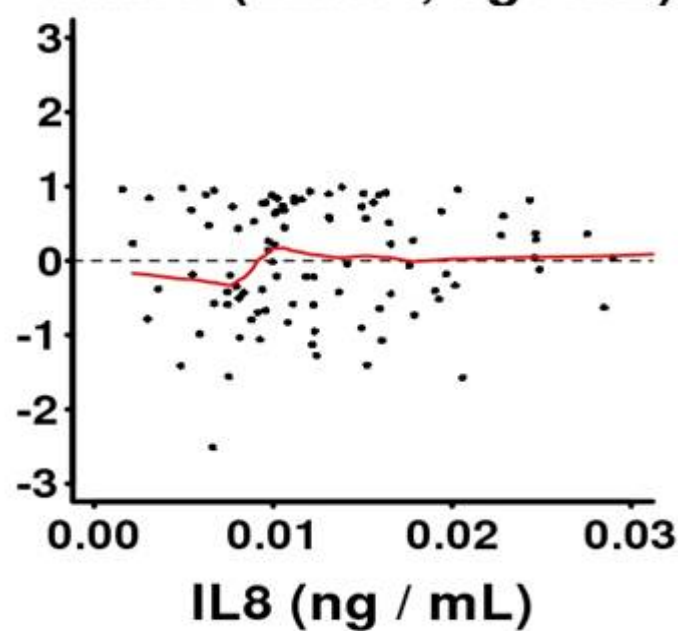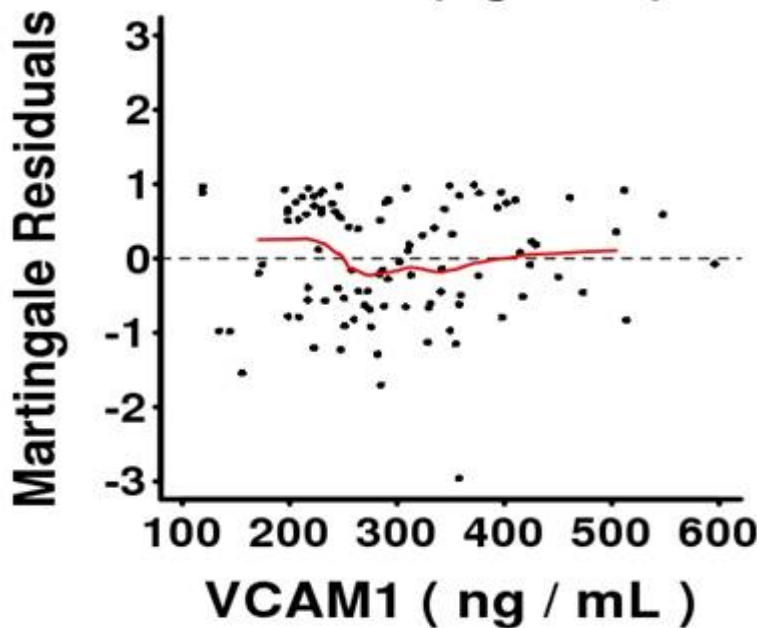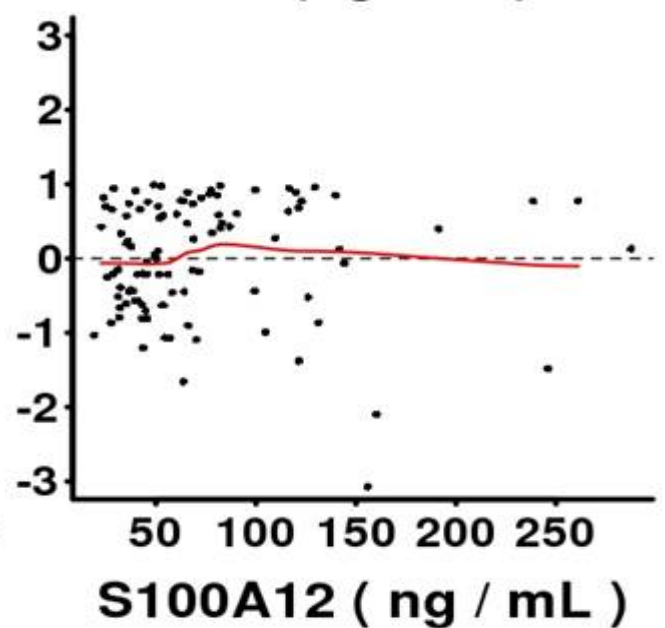

# Martingale residuals—Clinical Predictors

Cohort: **Validation**

Outcome: **Progression Free Survival by FVC  
(Lung Transplant is Censored)**

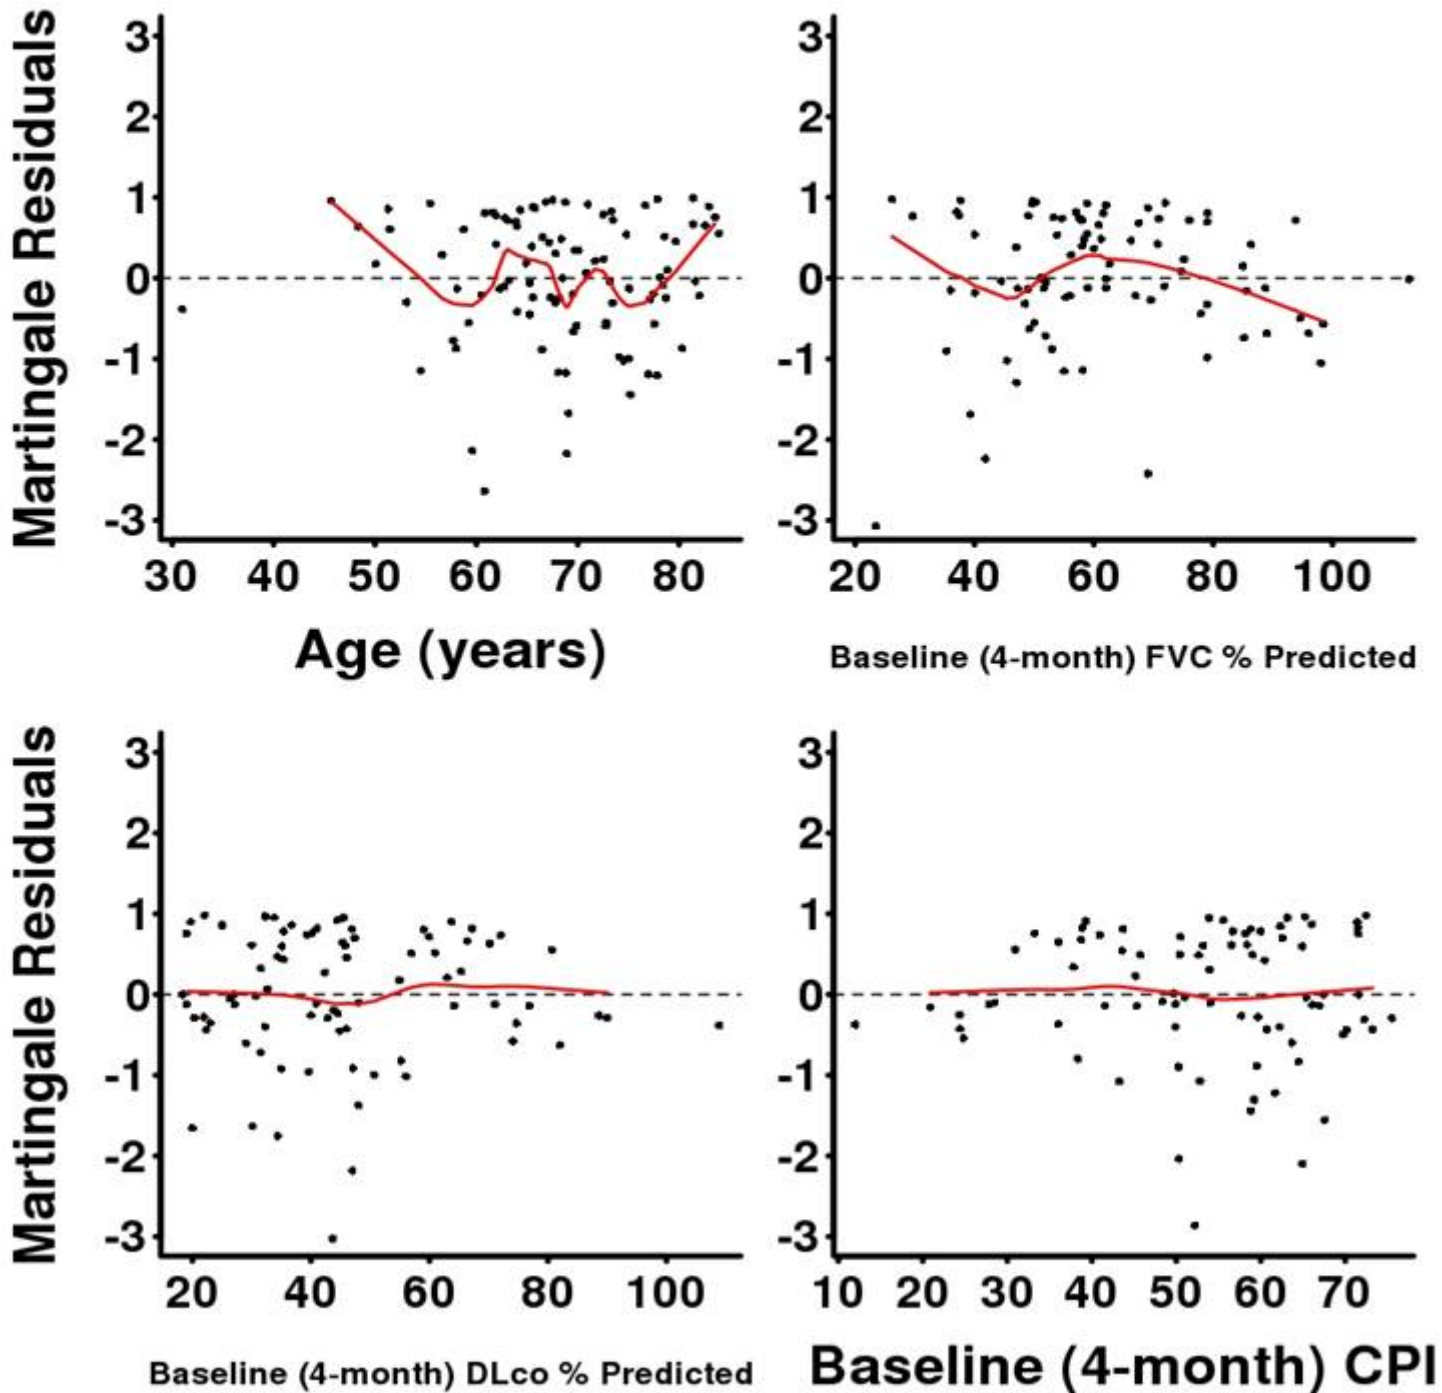

# Martingale residuals

—Biomarkers

Cohort: **Validation**

Outcome: **Progression**

**Free Survival by FVC**

**(Lung Transplant is**

**Censored)**

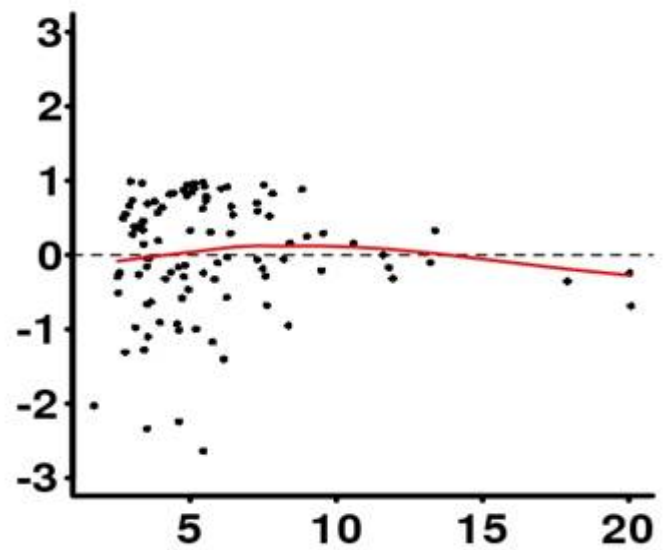

**MMP7 (ELISA, ng / mL)**

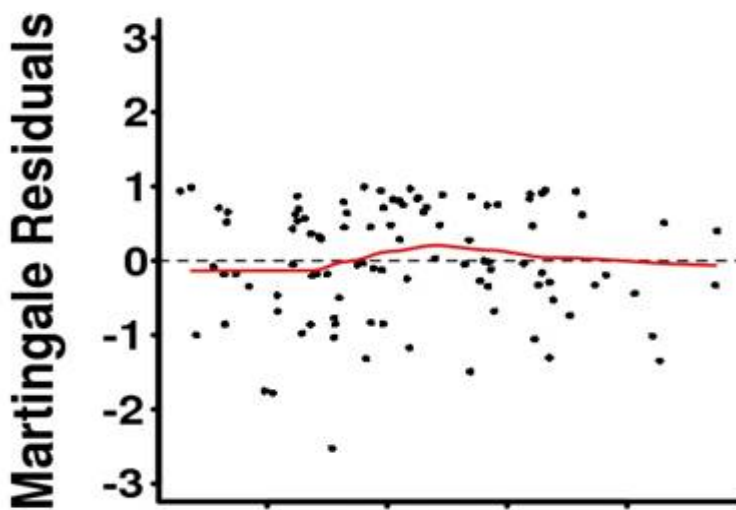

**ICAM1 (ng / mL)**

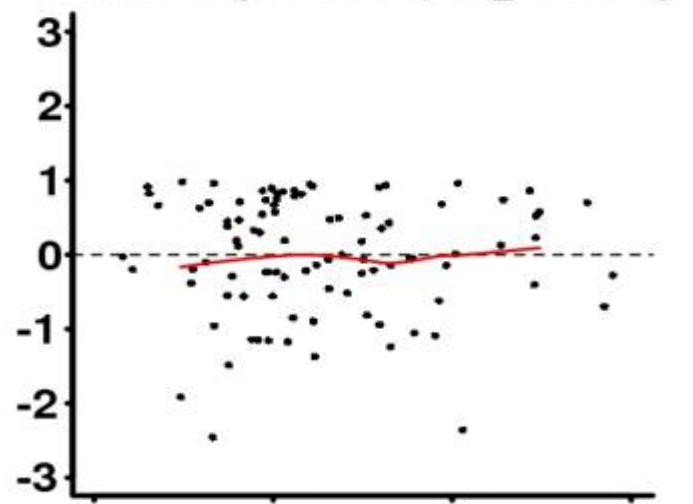

**IL8 (ng / mL)**

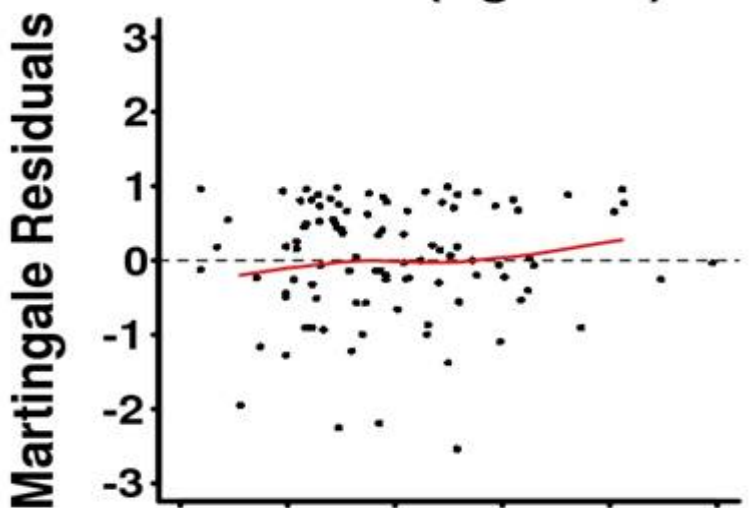

**VCAM1 (ng / mL)**

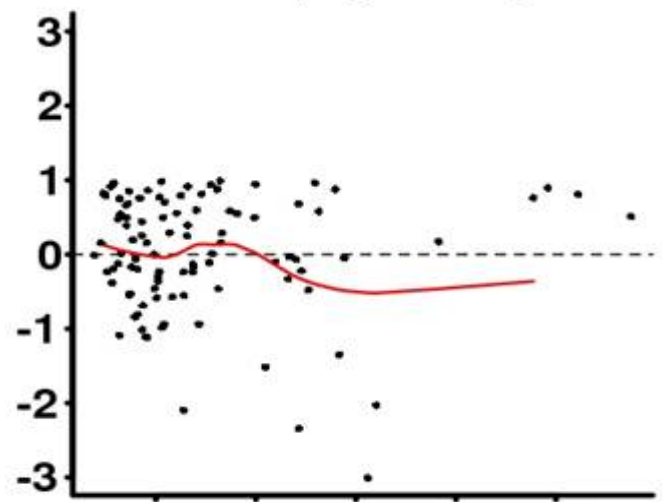

**S100A12 (ng / mL)**

# Martingale residuals—Clinical Predictors

Cohort: **Validation**

Outcome: **Progression Free Survival by DLCO  
(Lung Transplant is Censored)**

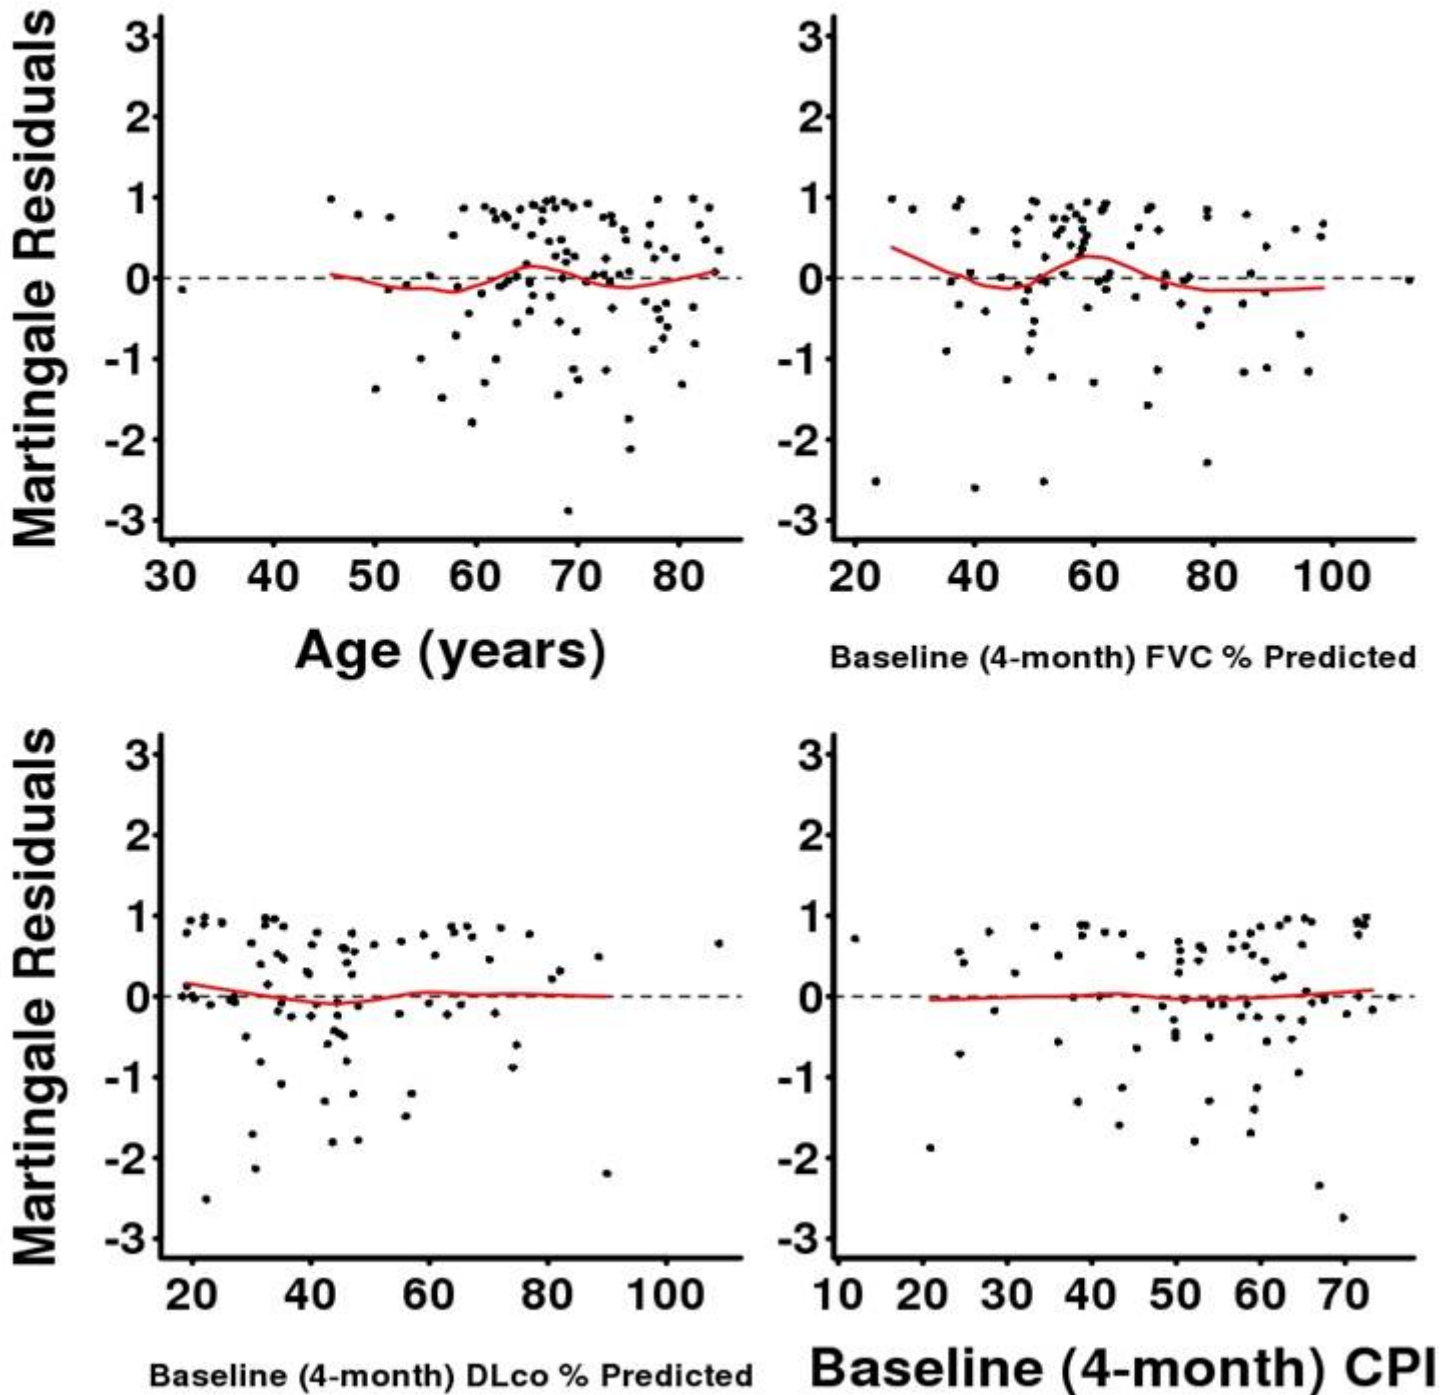

# Martingale residuals

—Biomarkers

Cohort: **Validation**

Outcome: **Progression**

**Free Survival by DLCO  
(Lung Transplant is  
Censored)**

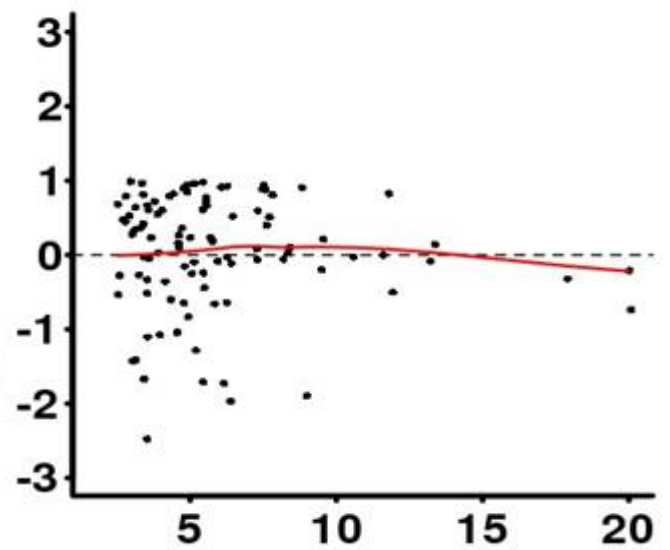

**MMP7 (ELISA, ng / mL)**

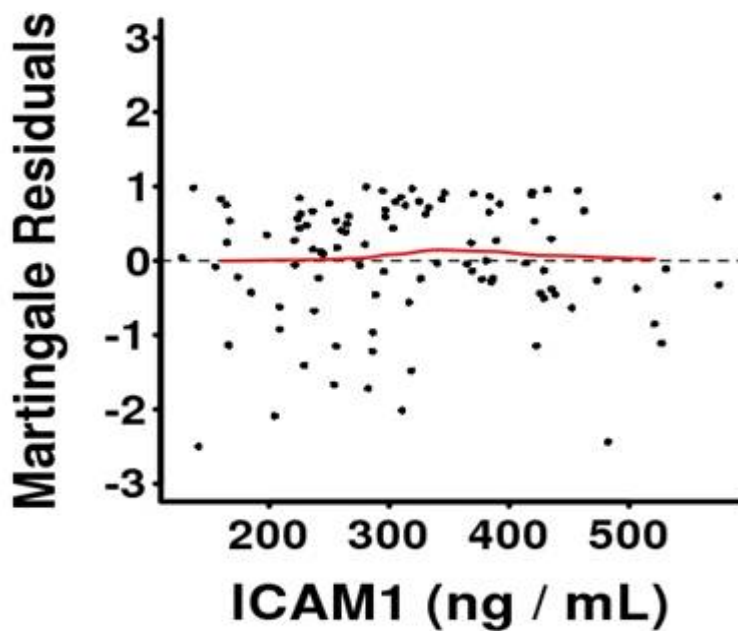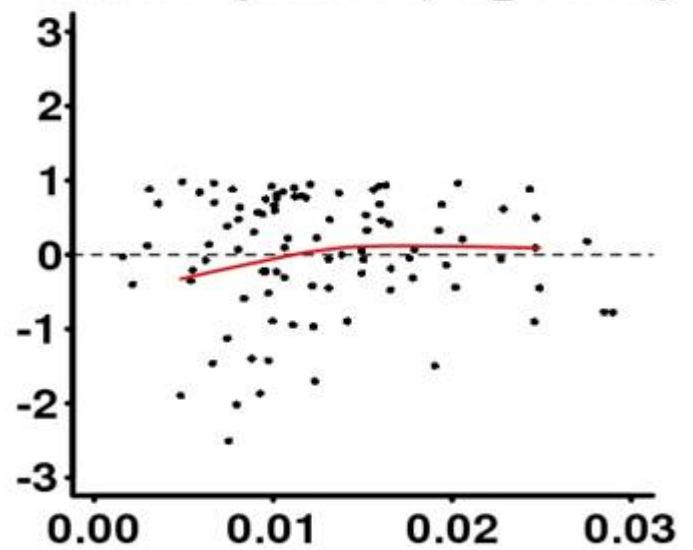

**IL8 (ng / mL)**

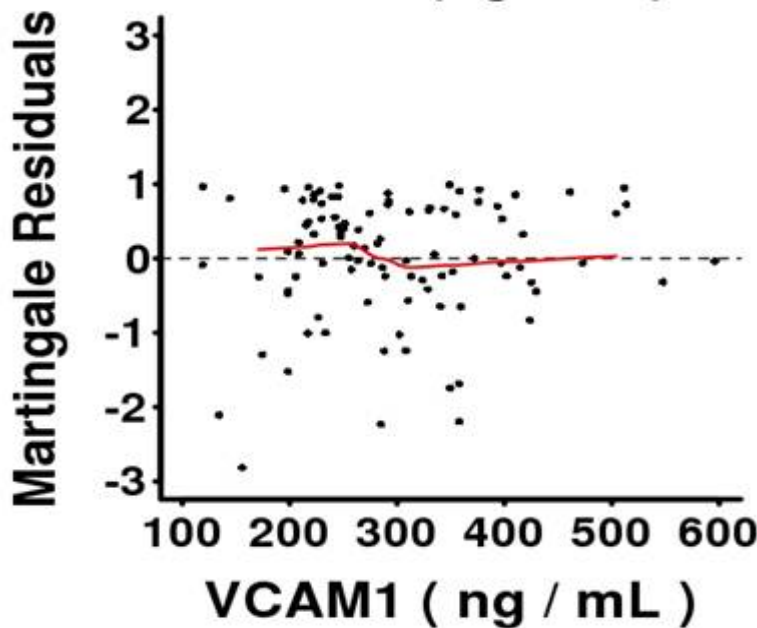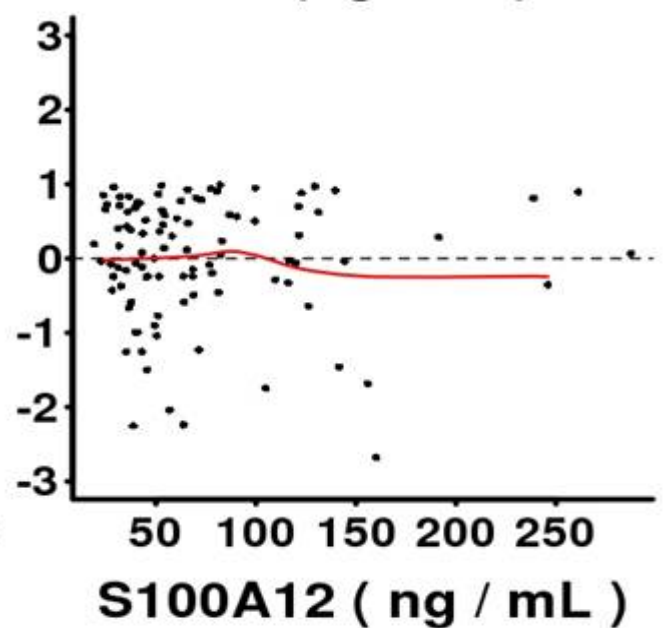

**S100A12 ( ng / mL )**



# Martingale residuals—Clinical Predictors

Cohort: **Validation**

Outcome: **Progression Free Survival by CPI  
(Lung Transplant is Censored)**

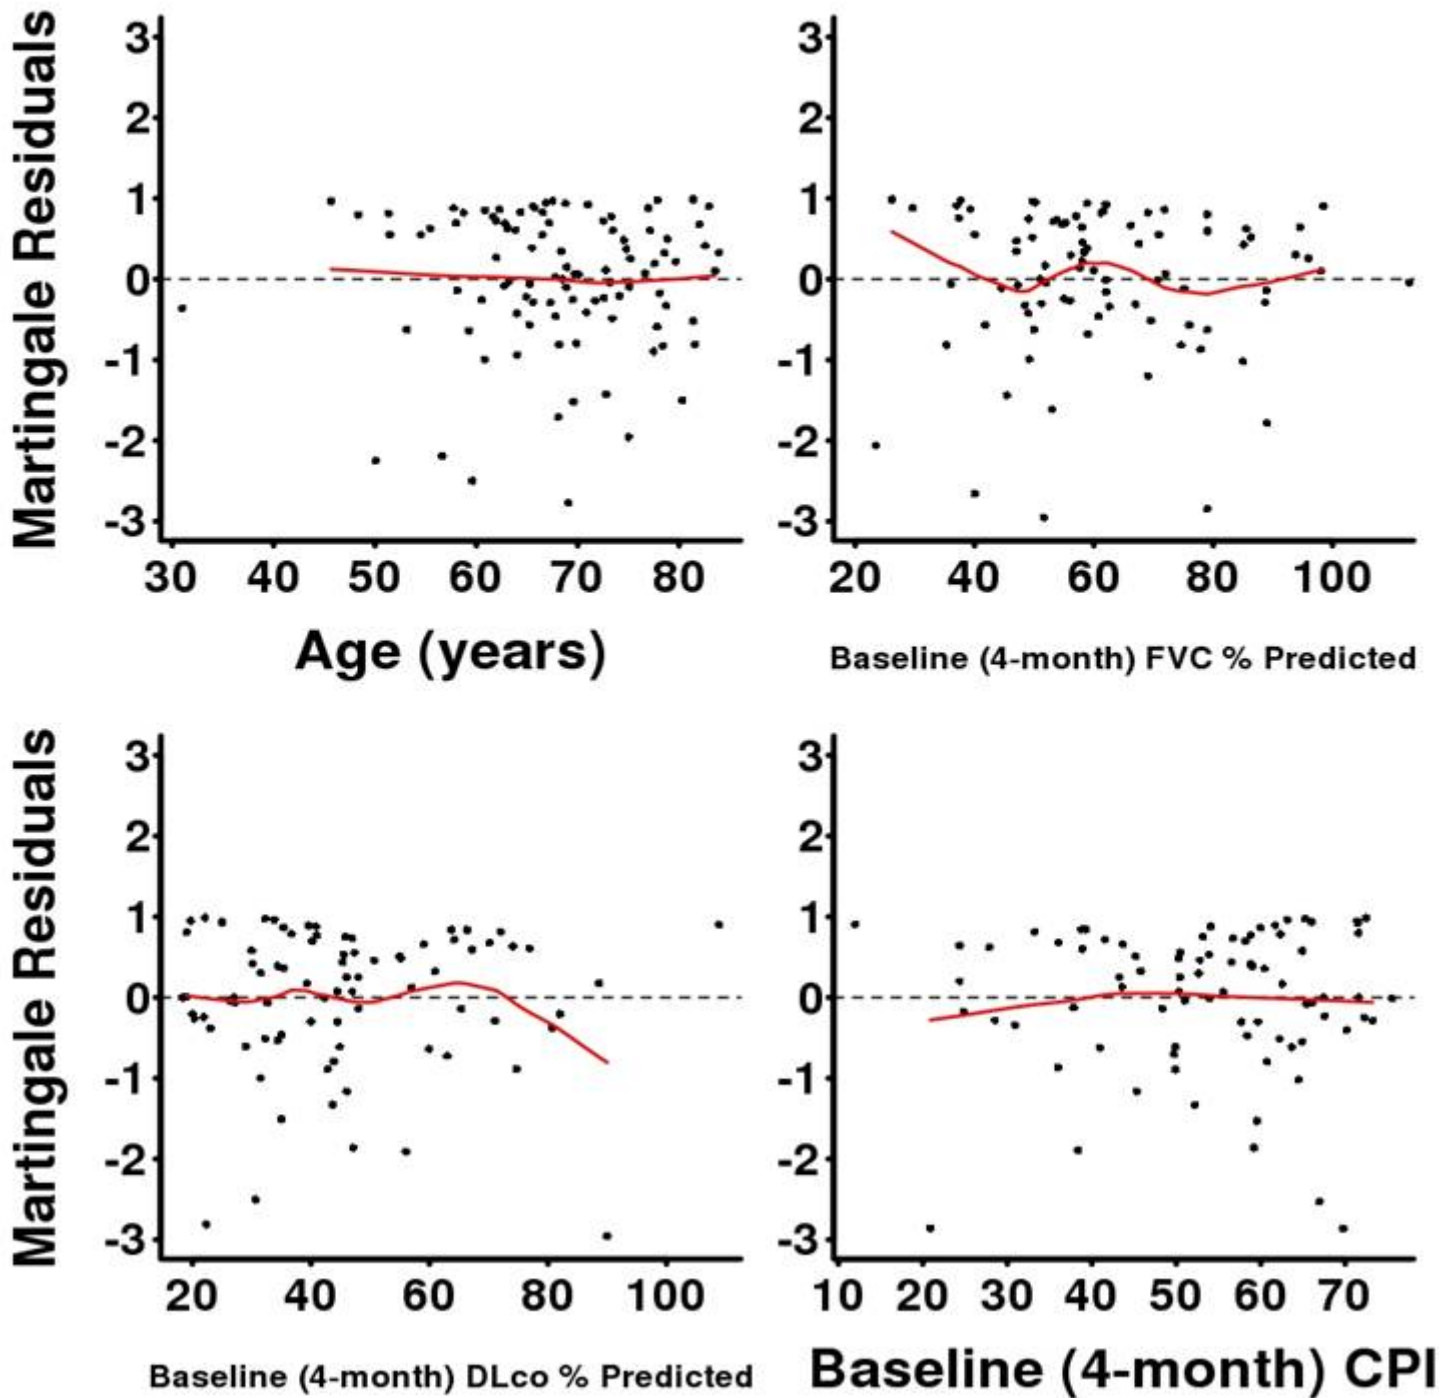

# Martingale residuals

—Biomarkers

Cohort: **Validation**

Outcome: **Progression**

**Free Survival by CPI  
(Lung Transplant is  
Censored)**

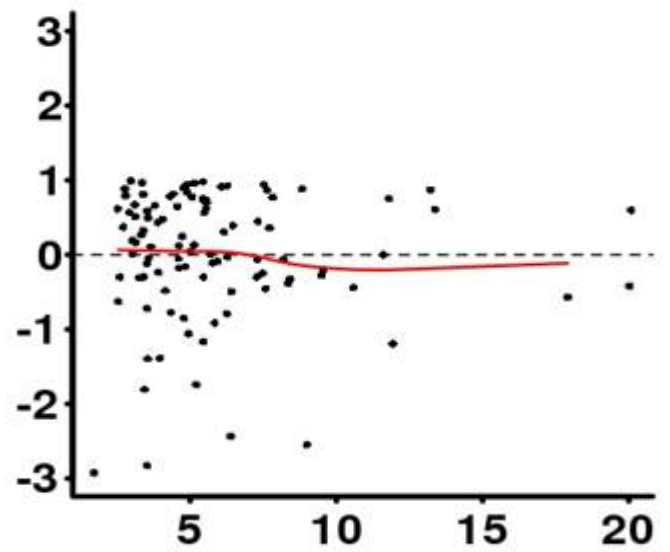

**MMP7 (ELISA, ng / mL)**

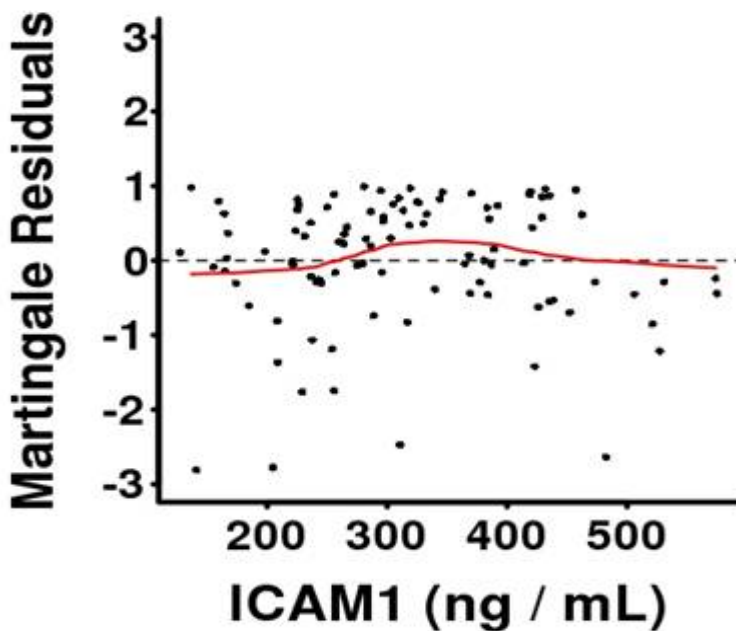

**ICAM1 (ng / mL)**

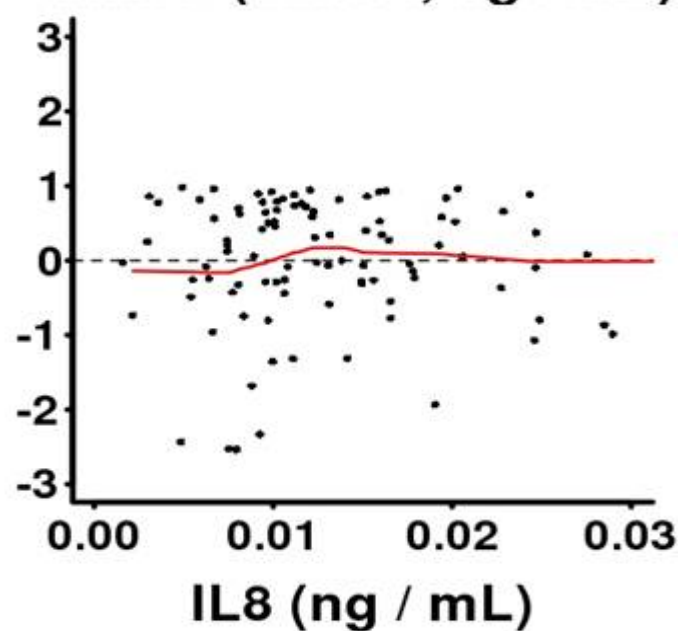

**IL8 (ng / mL)**

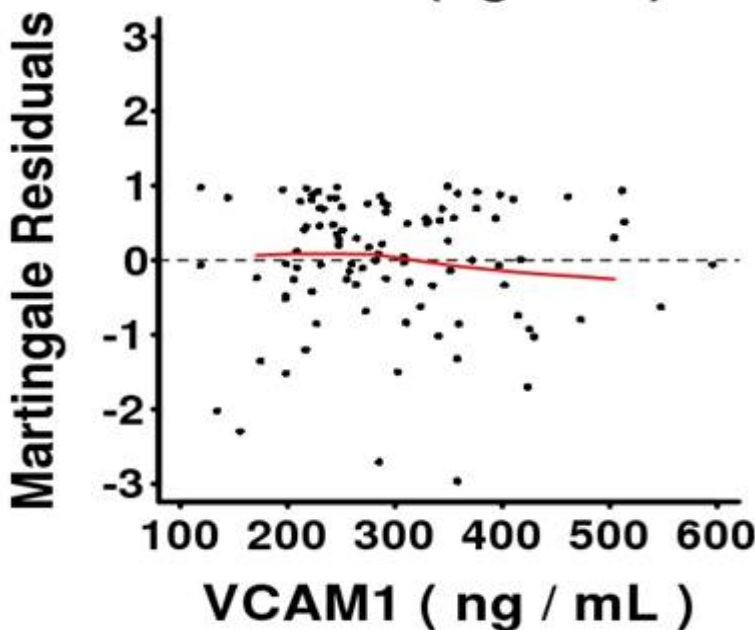

**VCAM1 (ng / mL)**

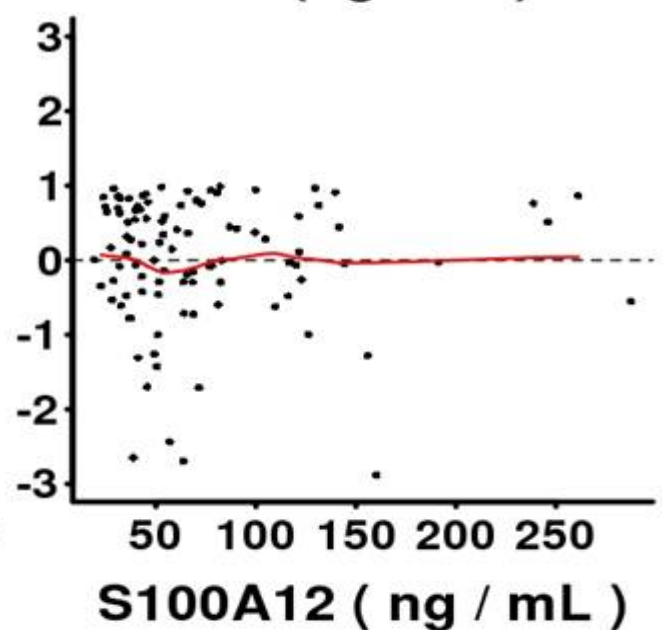

**S100A12 (ng / mL)**

# Martingale residuals—Clinical Predictors

Cohort: **Validation**

Outcome: **Progression Free Survival by FVC  
(Lung Transplant counts as event)**

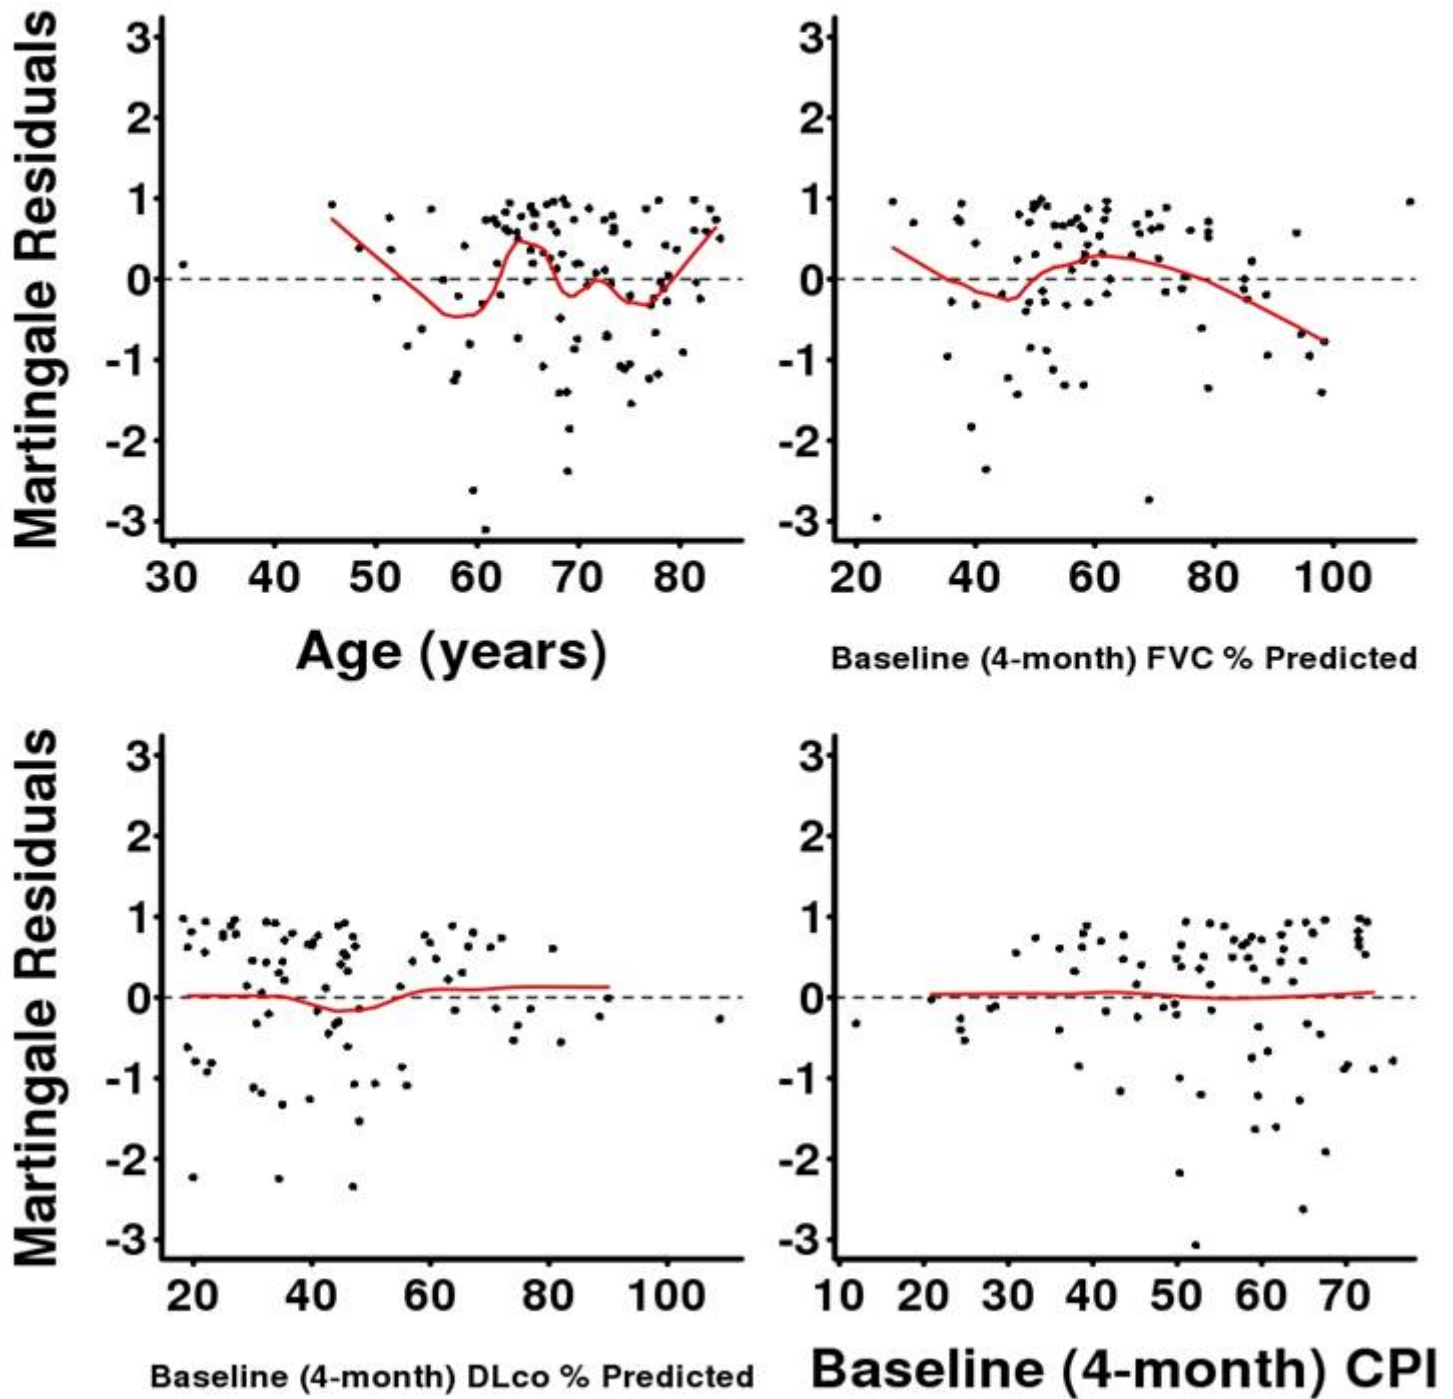

# Martingale residuals

—Biomarkers

Cohort: **Validation**

Outcome: **Progression**

**Free Survival by FVC  
(Lung Transplant  
counts as event)**

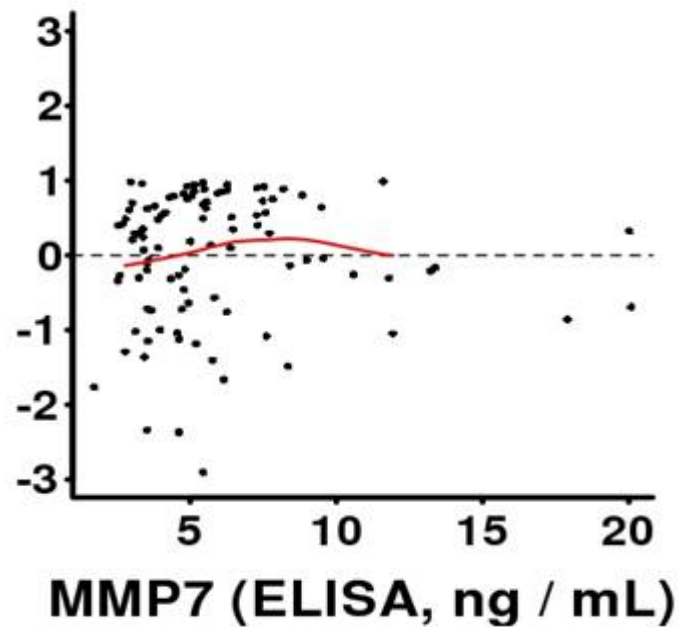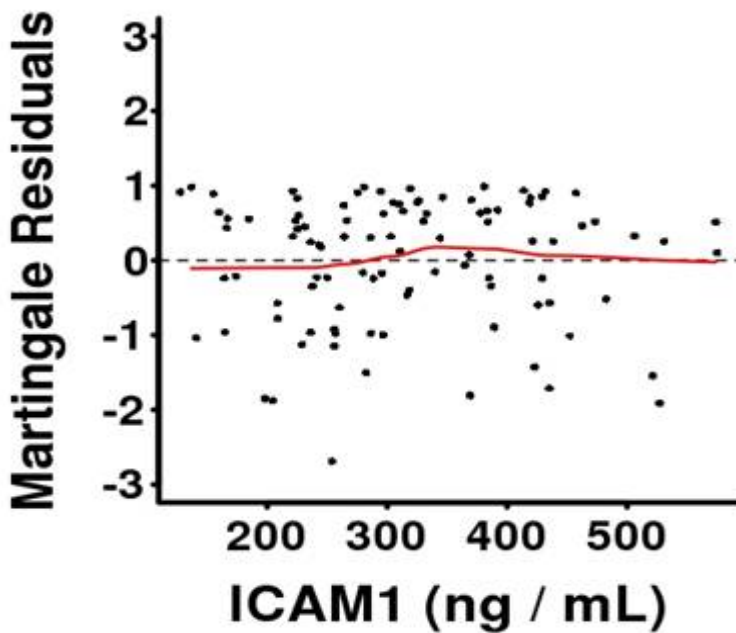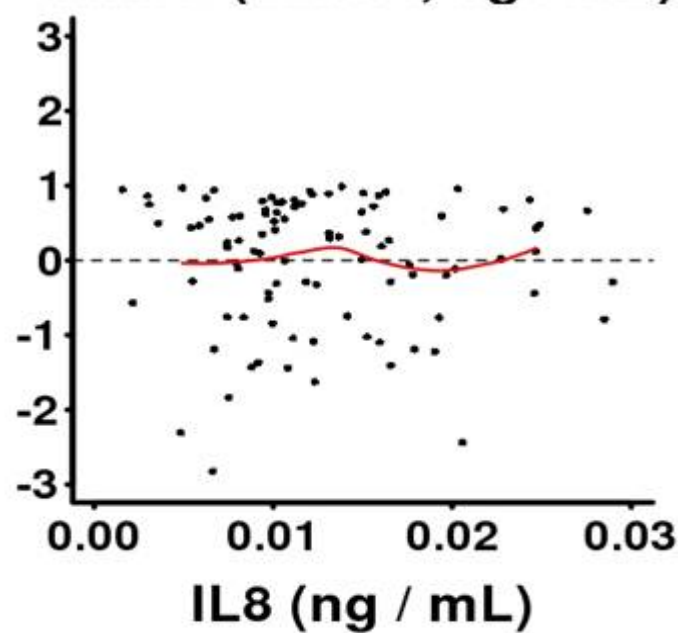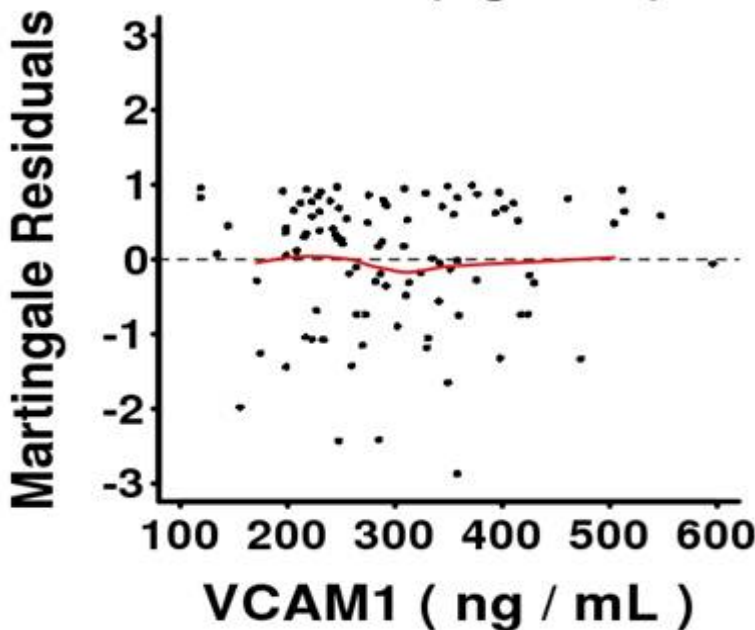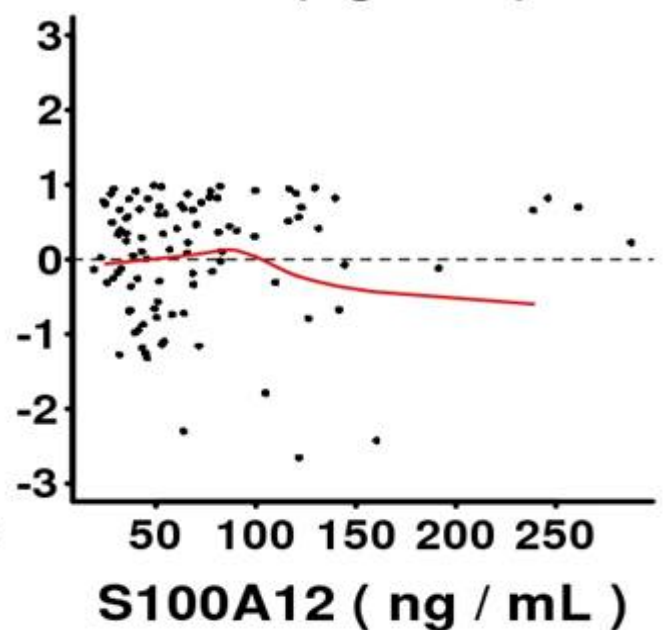

# Martingale residuals—Clinical Predictors

Cohort: **Validation**

Outcome: **Progression Free Survival by DLCO  
(Lung Transplant counts as event)**

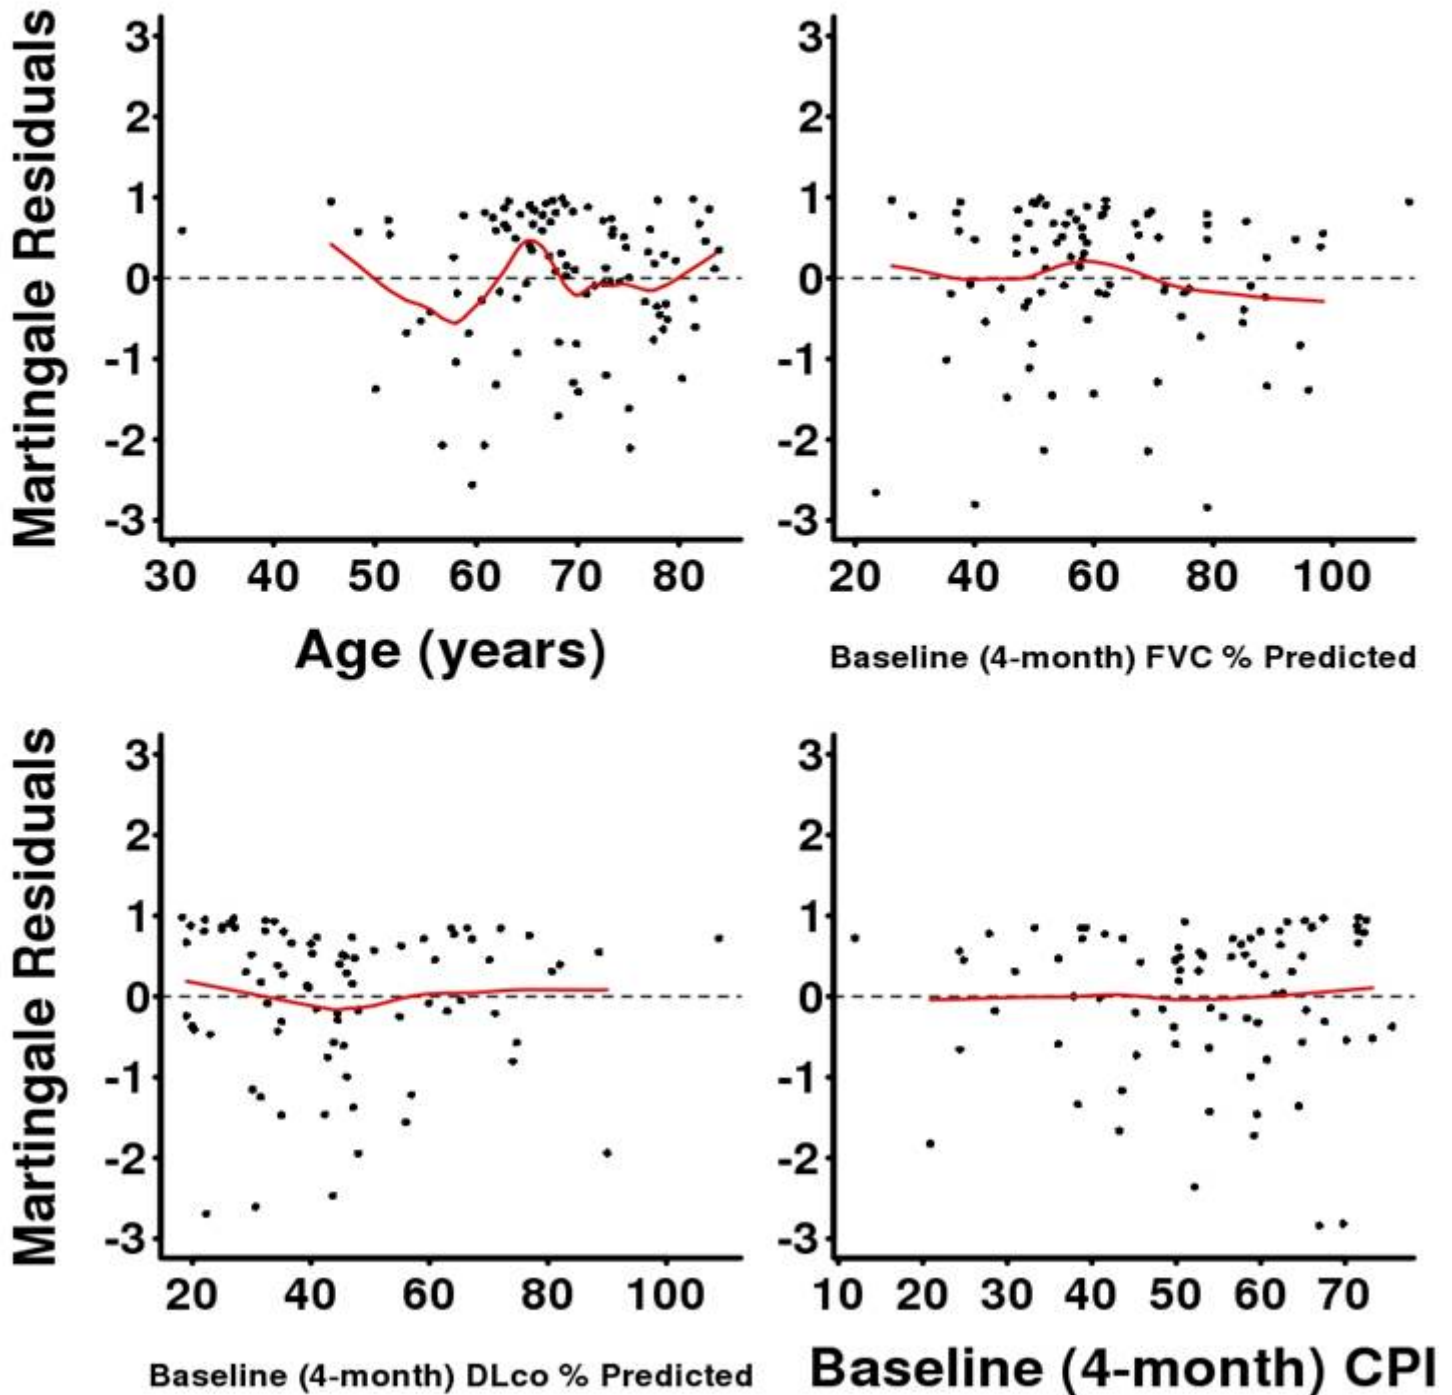

# Martingale residuals

—Biomarkers

Cohort: **Validation**

Outcome: **Progression**

**Free Survival by DLCO  
(Lung Transplant  
counts as event)**

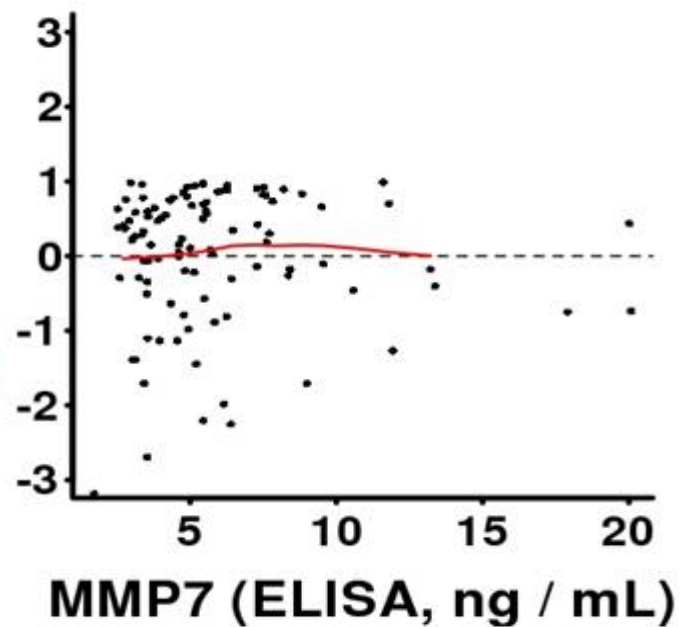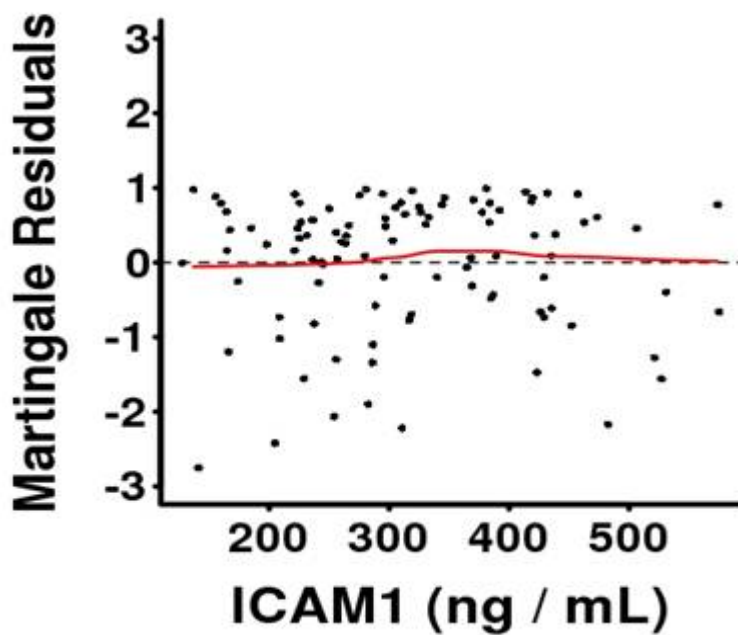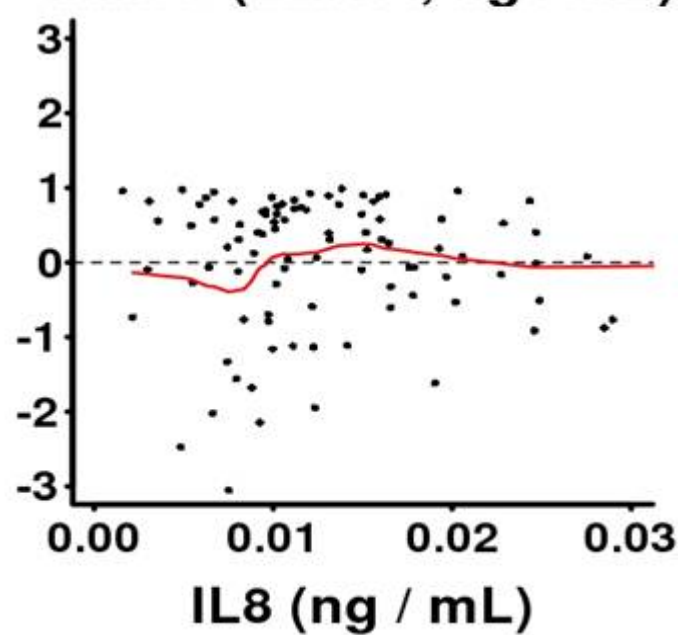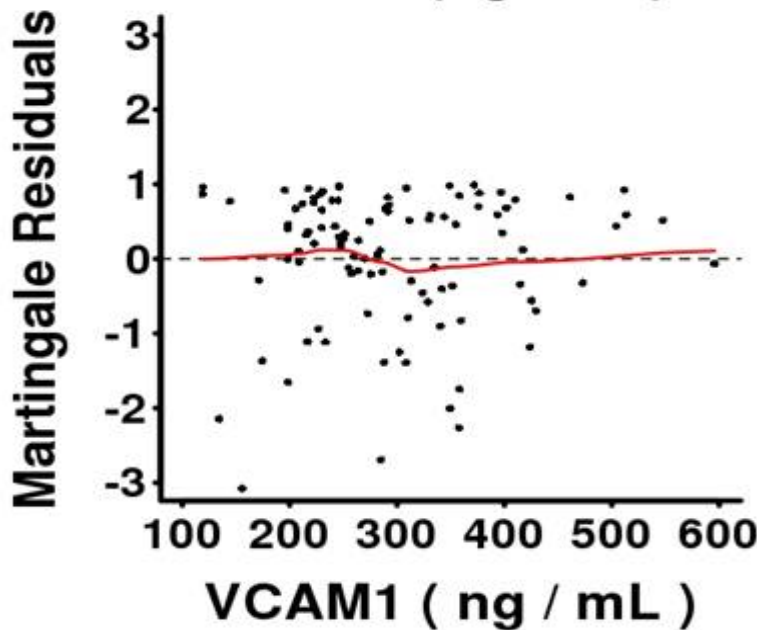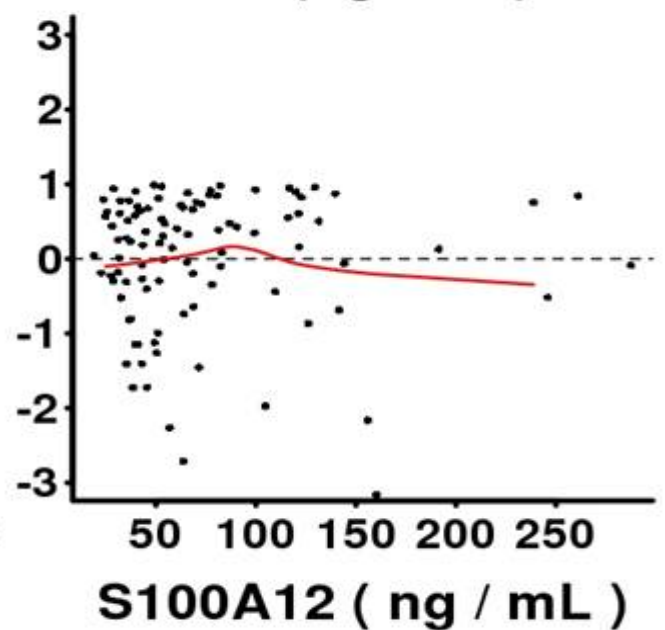

# Martingale residuals—Clinical Predictors

Cohort: **Validation**

Outcome: **Progression Free Survival by CPI**  
**(Lung Transplant counts as event)**

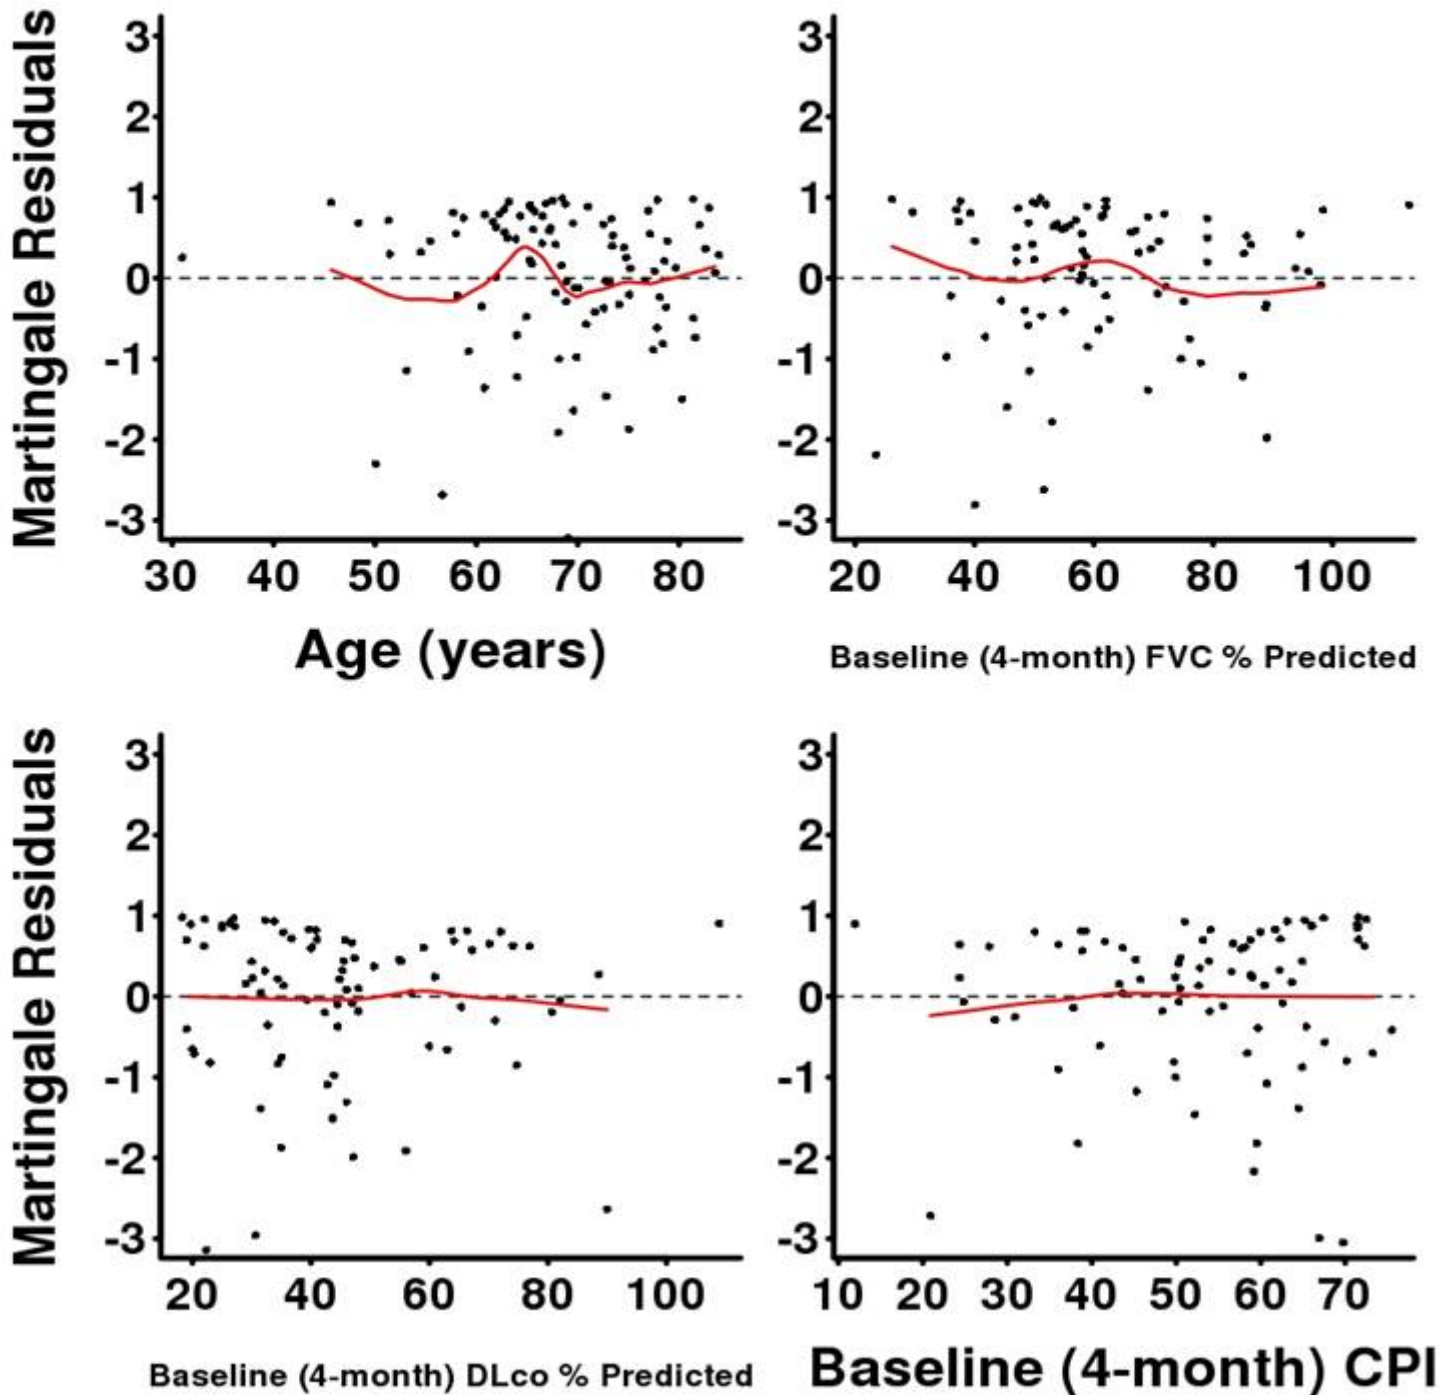

# Martingale residuals

—Biomarkers

Cohort: **Validation**

Outcome: **Progression**

**Free Survival by CPI  
(Lung Transplant  
counts as event)**

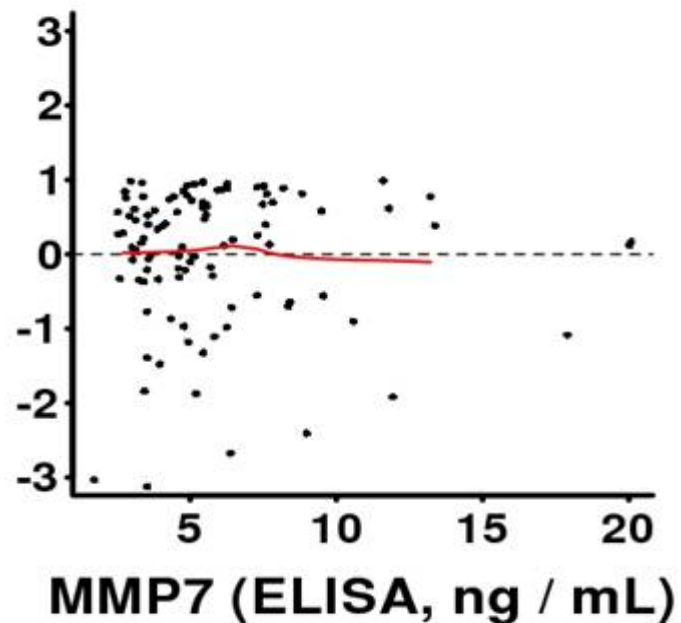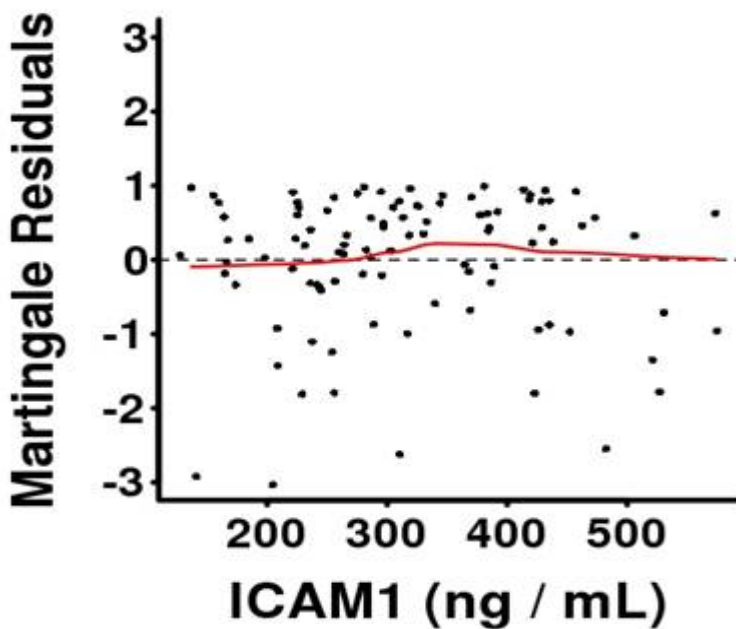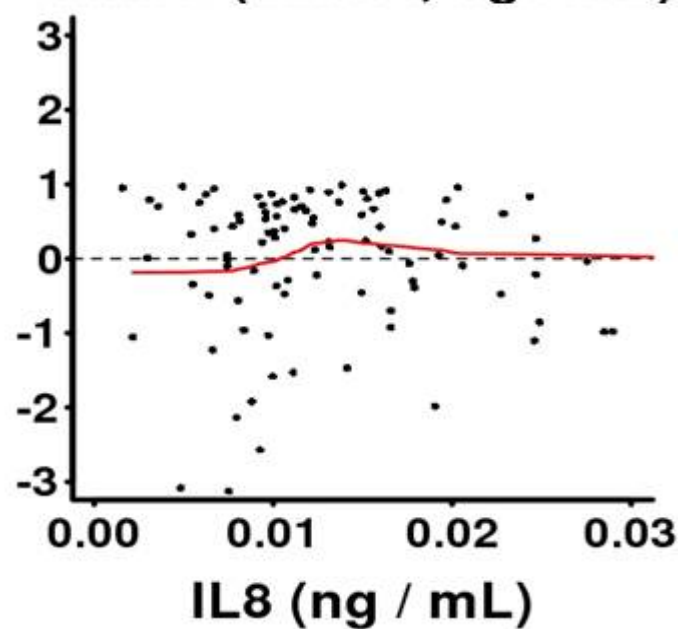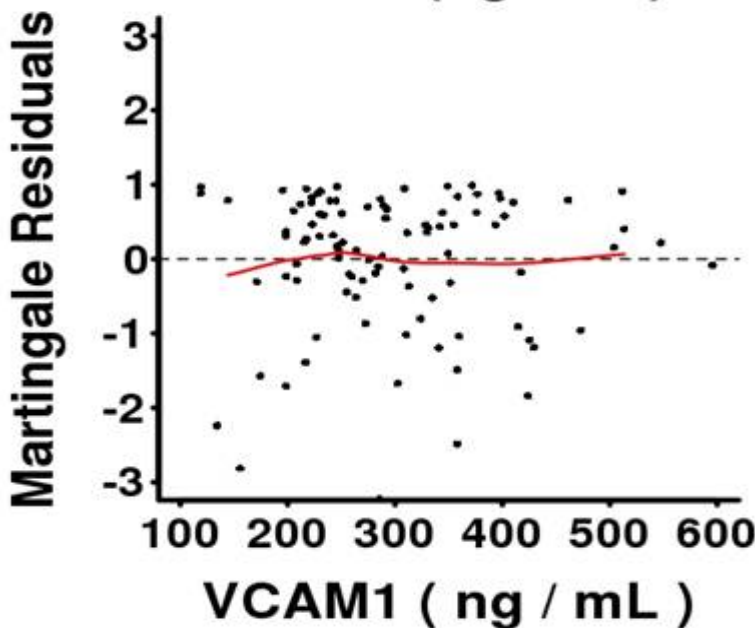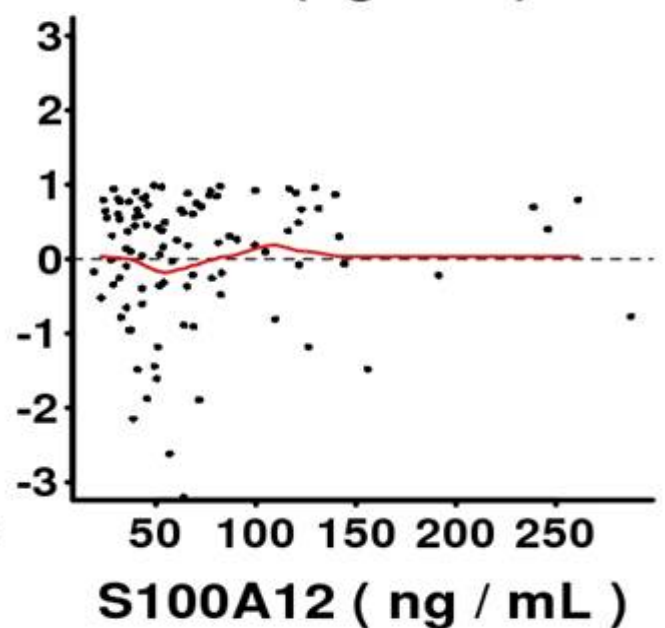

Supplement: supp_185.1.67_Richards_ODS_figures.pdf [file supp_185.1.67_Richards_ODS_figures.pdf]
