# Supplementary material
Source: PubMed Central journal article supplement (PMC3262037)
Supplement: supp_185.1.67_Richards_ODS.pdf [file supp_185.1.67_Richards_ODS.pdf]

# Online Supplement

---

**Peripheral blood proteins predict survival and disease progression in**

## **Idiopathic Pulmonary Fibrosis**

<sup>1</sup>Thomas J. Richards, PhD; <sup>1</sup>Yingze Zhang, PhD; <sup>2</sup>Fred Baribaud, MA; <sup>2</sup>Susan Flavin, MSN; <sup>2</sup>Carrie Brodmerkel, PhD; <sup>2</sup>Daniel Horowitz, BS; <sup>2</sup>Katherine Li, MS; <sup>1</sup>Jiin Choi, MS, <sup>1</sup>Louis J. Vuga, MD, MPH; <sup>1</sup>Kathleen O. Lindell, PhD, RN; <sup>1</sup>Melinda Klesen, BA; \*<sup>1</sup>Naftali Kaminski, MD ;

\*<sup>1</sup>Kevin F. Gibson, MD.

<sup>1</sup>The Dorothy P. & Richard P. Simmons Center for Interstitial Lung Disease, Division of Pulmonary, Allergy, & Critical Care Medicine, Department of Medicine, University of Pittsburgh

<sup>2</sup>Centocor R&D Inc, Radnor, PA.

## **Introduction**

This online supplement contains Supplementary Methods for the manuscript as well as Supplementary Results. The Supplementary Methods extend those given in the manuscript, providing details on both the Rules Based Medicine and other assays used for derivation and validation cohorts. The Supplementary Results consist of full results tables and plots of martingale residuals for all outcomes and predictors, for both derivation and replication cohorts.

## **Supplementary Methods**

### **The Discovery Map v1.0 Rules Based Medicine website**

**(<http://www.rulesbasedmedicine.com/discoverymap>, accessed July 30, 2011).**

DiscoveryMAP v1.0 samples are tested on an automated platform in RBM's CLIA-certified laboratory using proprietary reagents and software. The RBM platform is validated to clinical laboratory standards and provides accurate and reproducible biomarker measurements. This enables the discovery of patterns made up of multiple biomarkers, many with small, yet reproducibly detectable changes. Multiplexing allows all of these assays to be performed using less than 750 microliters of serum or plasma, as compared to single-plex platforms, such as ELISA, which would require milliliters.

DiscoveryMAP is a comprehensive quantitative immunoassay service, containing 188 tests. It represents the culmination of 10 years of assay development for cytokines, chemokines, metabolic markers, hormones, growth factors, tissue remodeling proteins, angiogenesis markers, acute phase reactants, cancer markers, kidney toxicity markers, CNS biomarkers and other important serum proteins. DiscoveryMAP is designed for researchers who need a better understanding of their compound's efficacy, safety profile and biological activity as well as of the disease or condition being addressed.

## **Rules Based Medicine assays**

Concentrations of 92 cytokines and chemokines, matrix metalloproteinases (MMPs), and markers of apoptosis and epithelial injury were analyzed using the Human DiscoveryMAP® multiplex bead-based immunoassay (*Rules-Based Medicine*, Austin, TX) (24). The DiscoveryMAP allows testing of samples on an automated platform in RBM's CLIA-certified laboratory using proprietary reagents and software. The RBM platform is validated to clinical laboratory standards and provides accurate and reproducible biomarker measurements. Multiplexing allows all of these assays to be performed in small volumes. All 92 proteins selected on the Human DiscoveryMAP are listed in Table S1 of the online supplement. Associated with each protein in Table S1 is its lowest detectable dose (LDD), defined as the mean plus 3 standard deviations of 20 blank readings. Values below the LDD are considered undetectable. Proteins were excluded from the analysis of prognosis prediction only if concentrations were lower than LDD in at least 95% of samples in the validation or derivation cohort.

## **Bio-Plex assays**

For the validation study, plasma concentrations of S100A12 were analyzed using a CircuLex S100A12 / EN-RAGE ELISA kit according to the manufacturer's instruction. (MBL International, Woburn, MA). Plasma levels of ICAM, VCAM, and IL8 were analyzed using Luminex technology with a Bio-Plex 100 and Bio-Plex manager software 5.0 (Bio-Rad, Hercules, CA ). Specifically, ICAM and VCAM were analyzed using MILLIPLEX MAP Human CVD Panel 1 kit (Millipore, Billerica, MA), IL8 was analyzed using a IL8 Ultrasensitive Human Singleplex kit (Invitrogen, Carlsbad, CA).

## **Statistical Analysis**

Time-to-event outcomes analyzed include mortality, transplant free survival and progression free survival (PFS). For mortality analysis, patients were followed from the blood draw until death, or censoring on April 1, 2010; mortality data were complemented by searching The Social Security Death Index (SSDI). For transplant free survival, in addition to mortality transplants were counted as events. For PFS analysis patients were followed from the blood draw until either 1.) disease progression, defined as the first *relative* decline of 10% or more in FVC % predicted within a one year interval; 2.) death without recorded disease progression; or 3.) censoring at the latest pulmonary function test or last contact. Any patient receiving a lung transplant during follow-up was censored at transplant date in both mortality and progression free survival analyses but not in transplant free survival.

Data were analyzed using the R environment for statistical data analysis and graphics (25), particularly the survival package (26). Survival curves were estimated using the Kaplan-Meier method. For each outcome, each protein detectable in plasma was dichotomized into high- and low-risk ranges using profile likelihood (27). Briefly, for profile likelihood the risk threshold was used as a parameter in the proportional hazards (PH) model, there being only finitely many possible thresholds based on the observed data. The (profile) partial likelihood was maximized for each threshold and the threshold yielding the highest maximized profile likelihood was chosen for each marker, separately for all outcomes. Model fit was assessed by examining martingale residuals. Additionally we computed quintiles, quartiles, and tertiles, and fit Cox proportional hazards (PH) models with four, three, and two degrees of freedom, respectively, to explore variation in the hazard ratio as a function of each predictors (see supplemental data). Associations of biomarkers with IPF were tested using the log rank test and Cox PH model. The PH model was used to adjust for Age, gender, and baseline pulmonary function assessed by FVC or composite physiologic index (CPI) computed as follows (28):  $CPI = 91.0 - (0.65 \times Dlco \% \text{ Predicted}) - (0.53 \times Fvc \% \text{ Predicted}) + (0.34 \times FEV_1 \% \text{ Predicted})$ . For

multiple testing in marker selection the Bonferroni method was used to control the family-wise error rate at 5%.

### **Derivation of Combined Risk Index**

We applied the stepAIC approach for variable selection in the Cox Proportional hazards models that combine peripheral blood biomarkers with known predictors of mortality such as age, gender, and baseline pulmonary function. Starting with a model including Age at blood draw, gender, baseline Fvc and DLco % Predicted, as well as Composite Physiologic index (CPI) and all five candidate biomarkers, to avoid overfitting we set the algorithm to use the conservative Schwarz criterion with scope broad enough to encompass models with both main effects and interactions among biomarkers and clinical parameters, with movement of predictors possible in either direction (in or out of the model) at any step. Once a combined set of predictors was derived we computed a risk score, or personal clinical and molecular mortality index (PCMI), on the scale of the log hazard ratio, by multiplying the beta coefficients by 100 and summing (du Bois, Weycker et al. 2011). We then expressed the probability  $S(t)$  of t-year survival after the blood draw as  $S(t) = S_0(t) \cdot \exp[0.01 \cdot \text{PCMI}]$ , where  $S_0(t)$  is the t-year survival probability for a patient with “reference” predictors. Here, to ensure that increasing PCMI values are associated with higher mortality risk, we expressed DLco as the difference from 100% percent predicted and CPI as the difference from 7, which is the CPI computed for a patient with 100% predicted FVC and DLco and also FEV<sub>1</sub>. Note that the choice of these reference values for the predictors does not affect variable selection.

**Table S1. Alphabetical list of all proteins assayed on Human DiscoveryMAP®**

| Marker                           | SwissProt ID(s)           | Abbrev.      | Units | LDD    | Detecable |
|----------------------------------|---------------------------|--------------|-------|--------|-----------|
| Adiponectin                      | Q15848                    | ADPN         | ug/mL | 0.2    | Yes       |
| Alpha1 Antitrypsin               | P01009                    | A1AT         | mg/mL | 0.011  | Yes       |
| Alpha2 Macroglobulin             | P01023                    | A2M          | mg/mL | 0.061  | Yes       |
| AlphaFetoprotein                 | P02771                    | AFP          | ng/mL | 0.43   | Yes       |
| Apolipoprotein A1                | P02647                    | ApoA1        | mg/mL | 0.0066 | Yes       |
| Apolipoprotein CIII              | P02656                    | ApoCIII      | ug/mL | 2.7    | Yes       |
| Apolipoprotein H                 | P02749                    | ApoH         | ug/mL | 8.8    | Yes       |
| Beta2 Microglobulin              | P61769                    | B2M          | ug/mL | 0.013  | Yes       |
| BrainDerived Neurotrophic Factor | P23560                    | BDNF         | ng/mL | 0.029  | Yes       |
| Calcitonin                       | P01258                    | CALC         | pg/mL | 6.0    | No        |
| Cancer Antigen 125               | Q8WX17                    | CA125        | U/mL  | 4.2    | Yes       |
| Cancer Antigen 19-9              | Q9BXJ9                    | CA199        | U/mL  | 0.25   | Yes       |
| Carcinoembryonic Antigen         | P06731                    | CEA          | ng/mL | 0.84   | Yes       |
| CD40                             | Q6P2H9                    | CD40         | ng/mL | 0.021  | Yes       |
| CD40 Ligand                      | P29965                    | CD40LG       | ng/mL | 0.02   | Yes       |
| Complement 3                     | P01024                    | C3           | mg/mL | 0.0053 | Yes       |
| C Reactive Protein               | P02741                    | CRP          | ug/mL | 0.0015 | Yes       |
| Creatine KinaseMB                | P12277, P06732            | CKMB         | ng/mL | 0.42   | Yes       |
| EGF                              | P01133                    | EGF          | pg/mL | 7.4    | Yes       |
| ENA78                            | P42830                    | CXCL5        | ng/mL | 0.076  | Yes       |
| Endothelin1                      | P05305                    | EDN1         | pg/mL | 7.2    | Yes       |
| Eotaxin                          | P51671                    | CCL11        | pg/mL | 41.0   | Yes       |
| Erythropoietin                   | P01588                    | EPO          | pg/mL | 166.0  | No        |
| Factor VII                       | P08709                    | F7           | ng/mL | 1.0    | Yes       |
| Fatty Acid Binding Protein       | P05413                    | FABP         | ng/mL | 3.0    | No        |
| Ferritin                         | P02794, P02792            | FT           | ng/mL | 1.4    | Yes       |
| FGF basic                        | P09038                    | FGF2         | pg/mL | 98.0   | Yes       |
| Fibrinogen                       | P02671, P02675,<br>P02679 | FG           | mg/mL | 0.0098 | Yes       |
| GCSF                             | P09919                    | CSF3         | pg/mL | 5.0    | Yes       |
| Glutathione STransferase         | P08263                    | GST          | ng/mL | 0.4    | Yes       |
| GMCSF                            | P04141                    | CSF2         | pg/mL | 57.0   | No        |
| Growth Hormone                   | P01241                    | GH           | ng/mL | 0.13   | Yes       |
| Haptoglobin                      | P00738                    | HP           | mg/mL | 0.025  | Yes       |
| ICAM1                            | P05362                    | ICAM1        | ng/mL | 3.2    | Yes       |
| IFN $\gamma$                     | P01579                    | IFNG         | pg/mL | 4.6    | Yes       |
| IgA                              |                           | IgA          | mg/mL | 0.0084 | Yes       |
| IgE                              |                           | IgE          | ng/mL | 14.0   | Yes       |
| IGF1                             | P01343                    | IGF1         | ng/mL | 4.0    | Yes       |
| IgM                              |                           | IgM          | mg/mL | 0.015  | Yes       |
| IL1alpha                         | P01583                    | IL1 $\alpha$ | pg/mL | 0.0025 | Yes       |
| IL1beta                          | P01584                    | IL1 $\beta$  | ng/mL | 1.5    | Yes       |
| IL1ra                            | P18510                    | IL1RN        | pg/mL | 15.0   | Yes       |
| IL2                              | P60568                    | IL2          | pg/mL | 60.0   | No        |
| IL3                              | P08700                    | IL3          | ng/mL | 0.17   | No        |

| Marker                         | SwissProt ID(s) | Abbrev.  | Units  | LDD   | Detecable |
|--------------------------------|-----------------|----------|--------|-------|-----------|
| IL4                            | P05112          | IL4      | pg/mL  | 104.0 | No        |
| IL5                            | P05113          | IL5      | pg/mL  | 33.0  | No        |
| IL6                            | P05231          | IL6      | pg/mL  | 12.0  | No        |
| IL7                            | P13232          | IL7      | ng/mL  | 53.0  | Yes       |
| IL8                            | P10145          | IL8      | pg/mL  | 3.5   | Yes       |
| IL10                           | P22301          | IL10     | pg/mL  | 15.0  | No        |
| IL12p40                        | P29460          | IL12p40  | pg/mL  | 1.2   | No        |
| IL12p70                        | P29459          | IL12p70  | ng/mL  | 94.0  | No        |
| IL13                           | P35225          | IL13     | ng/mL  | 57.0  | Yes       |
| IL15                           | P40933          | IL15     | pg/mL  | 1.3   | No        |
| IL16                           | Q14005          | IL16     | pg/mL  | 66.0  | Yes       |
| IL17                           | Q16552          | IL17     | pg/mL  | 2.7   | Yes       |
| IL18                           |                 | IL18     | pg/mL  | 54.0  | Yes       |
| IL23                           | Q9NPF7          | IL23     | pg/mL  | 0.67  | No        |
| Insulin                        | P01308          | INS      | uIU/mL | 0.86  | Yes       |
| Leptin                         | P41159          | LEP      | ng/mL  | 0.1   | Yes       |
| Lipoprotein a                  |                 | LPA      | ug/mL  | 3.7   | Yes       |
| Lymphotactin                   | P47992          | LPTN     | ng/mL  | 0.38  | No        |
| MCP1                           | P13500          | CCL2     | pg/mL  | 52.0  | Yes       |
| MDC                            | O00626          | CCL22    | pg/mL  | 14.0  | Yes       |
| MIP1alpha                      | P10147          | CCL3     | pg/mL  | 13.0  | Yes       |
| MIP1beta                       | P13236          | CCL4     | pg/mL  | 38.0  | Yes       |
| MMP2                           | P08253          | MMP2     | ng/mL  | 150.0 | No        |
| MMP3                           | P08254          | MMP3     | ng/mL  | 0.2   | Yes       |
| MMP9                           | P14780          | MMP9     | ng/mL  | 37.0  | Yes       |
| Myeloperoxidase                | P05164          | MPO      | ng/mL  | 68.0  | Yes       |
| Myoglobin                      | P02144          | MB       | ng/mL  | 1.1   | Yes       |
| PAI1                           | P05121          | PAI1     | ng/mL  | 0.9   | Yes       |
| PAPPA                          | Q13219          | PAPPA    | mIU/mL | 0.037 | No        |
| Prostate Specific Antigen Free | P07288          | KLK3     | ng/mL  | 0.023 | Yes       |
| Prostatic Acid Phosphatase     | P15309          | ACPP     | ng/mL  | 0.034 | Yes       |
| RANTES                         | P13501          | CCL5     | ng/mL  | 0.048 | Yes       |
| S100A12                        | P80511          | S100A12  | ng/mL  | 0.25  | Yes       |
| Serum Amyloid P                | P02743          | SAP      | ug/mL  | 0.058 | Yes       |
| SGOT                           | P17174          | GOT1     | ug/mL  | 3.7   | Yes       |
| SHBG                           | P04278          | SHBG     | nmol/L | 1.3   | Yes       |
| Stem Cell Factor               | P21583          | SCF      | pg/mL  | 56.0  | Yes       |
| Thrombopoietin                 | P40225          | THPO     | ng/mL  | 3.2   | No        |
| Thyroid Stimulating Hormone    | P01215, P01222  | TSH      | uIU/mL | 0.028 | Yes       |
| Thyroxine Binding Globulin     | P05543          | TBG      | ug/mL  | 0.34  | Yes       |
| TIMP1                          | P01033          | TIMP1    | ng/mL  | 8.4   | Yes       |
| Tissue Factor                  | P13726          | TF       | ng/mL  | 0.84  | No        |
| TNFalpha                       | P01375          | TNFA     | pg/mL  | 4.0   | Yes       |
| TNFBeta                        | P01374          | TNFB     | pg/mL  | 46.0  | No        |
| TNF RII                        | Q92956          | TNFRSF14 | ng/mL  | 0.13  | Yes       |
| VCAM1                          | P19320          | VCAM1    | ng/mL  | 2.6   | Yes       |
| VEGF                           | P15692          | VEGF     | pg/mL  | 7.5   | Yes       |

| Marker                | SwissProt ID(s) | Abbrev. | Units | LDD | Detecable |
|-----------------------|-----------------|---------|-------|-----|-----------|
| von Willebrand Factor | P04275          | VWF     | ug/mL | 0.4 | Yes       |

## Supplementary Results: Derivation and Validation Cohorts

After a short description of the contents of a table of univariate results, all univariate results tables are presented. Each table occupies a single page and represents one outcome for one predictor for one cohort. For each predictor we computed quintiles, quartiles, and tertiles, and fit Cox proportional hazards (PH) models with four, three, and two degrees of freedom, respectively, to explore variation in the hazard ratio as a function of the predictor. We also fit a binary-split Cox PH model using profile likelihood, including a threshold parameter in the model and maximizing the profile (partial) likelihood. Each table has three sections separated by gray vertical lines. The left section lists numbers of patients at risk and the number who experience the event of interest during follow-up, along with hazard ratio estimates and 95% confidence intervals from Cox PH models. The center section describes the time-to-event distribution by category including Kaplan-Meier estimates of median time-to-event with Greenwood 95% confidence intervals. The right section lists model p-values from likelihood ratio and logrank (score) tests of the hypothesis that all the hazard ratios are unity. Finally, each table contains for each model a likelihood ratio test for deviations from linearity obtained by adding to a PH model with quantitative predictor a categorical version of the same predictor, with four, or three, or two, or one additional degree of freedom. This p-value is for a test of deviation from linearity in the predictor's effect on time-to-event.

After presenting all univariate results tables, we present plots of martingale residuals, for a further check on the linearity of predictors included in the Cox PH models. Each martingale residuals plot was obtained by fitting a univariate Cox PH model with a single continuous predictor and plotting the residuals versus the predictor, applying loess smoothing with automatic bandwidth selection to suggest the form of the predictor. There are two sets of martingale residuals plots for each cohort and outcome and predictor, one for clinical predictors and another for our biomarkers.



## Description of Univariate Results Tables

Univariate results are presented by Cohort, Outcome, and Predictor, as outlined below with necessary definitions or clarifications added.

### 1) Cohort:

#### a) Derivation

Plasma samples from 140 patients with IPF, analyzed by Rules Based Medicine assay.

#### b) Validation

Plasma samples from 101 patients with IPF, analyzed by ELISA or Luminex.

### 2) Outcome:

#### a) Mortality

Event = Death;

Censoring at lung transplant or end of follow-up (EOFu).

#### b) Transplant Free Survival

Event = Death or Lung transplant;

Censoring at EOFu.

#### c) Progression Free Survival by FVC (Lung Transplant is Censored)

Event = Relative decline of at least 10% in FVC % Predicted in one year, or death;

Censoring at lung transplant or EOFu.

#### d) Progression Free Survival by DLCO (Lung Transplant is Censored)

Event = Relative decline of at least 15% in DLco % Predicted in one year, or death;

Censoring at lung transplant or EOFu.

#### e) Progression Free Survival by CPI (Lung Transplant is Censored)

Event = Relative increase of at least 5% in CPI in one year, or death;

Censoring at lung transplant or EOFu.

#### f) Progression Free Survival by FVC (Lung Transplant counts as event)

Event = Relative decline of at least 10% in FVC % Predicted in one year, or lung transplant, or death;

Censoring at EOFu.

#### g) Progression Free Survival by DLCO (Lung Transplant counts as event)

Event = Relative decline of at least 15% in DLco % Predicted in one year, or lung transplant, or death;

Censoring at EOFu.

#### h) Progression Free Survival by CPI (Lung Transplant counts as event)

Event = Relative increase of at least 5% in CPI in one year, or lung transplant, or death;

Censoring at EOFu.

### 3) Predictor:

#### a) Age (years)

#### b) Gender

#### c) Baseline (4-month) FVC % Predicted

FVC % Predicted nearest to blood draw, if performed within 4 months of blood draw.

#### d) Baseline (4-month) DLco % Predicted

DLco % Predicted nearest to blood draw, if performed within 4 months of blood draw.

#### e) Baseline (4-month) CPI

CPI nearest to blood draw, if available within 4 months of blood draw.

#### f) Baseline (3-month) FVC % Predicted

FVC % Predicted nearest to blood draw, if performed within 3 months of blood draw.

#### g) Baseline (3-month) DLco % Predicted

DLco % Predicted nearest to blood draw, if performed within 3 months of blood draw.

**h) Baseline (3-month) CPI**

CPI nearest to blood draw, if available within 3 months of blood draw.

**i) MMP7 (ng / mL)**

**j) ICAM1 (ng / mL)**

**k) IL8 (ng / mL)**

**l) VCAM1 (ng / mL)**

**m) S100A12 (ng / mL)**

The Univariate Results Tables are presented in the order outlined above, **Predictor** within **Outcome** within **Cohort**. Each table has the tri-partite structure suggested by the gray vertical lines. The left side contains patient counts and hazard ratios (HRs) with lower and upper confidence limits (LCL and UCL, respectively) based on Cox proportional hazards (PH) models incorporating Quintiles, Quartiles, Tertiles, or binary split via profile likelihood. The middle section of each table describes survival distributions for each breakdown, including median survival with LCL and UCL. The right-hand section lists general model p-values. The individual columns in each table are described next.

| <b>Column</b>         | <b>Description</b>                                                                                                                                                                                                                            |
|-----------------------|-----------------------------------------------------------------------------------------------------------------------------------------------------------------------------------------------------------------------------------------------|
| <b>Patients (N)</b>   | Number of patients initially at risk for the event, by category.                                                                                                                                                                              |
| <b>Events (n)</b>     | Number of patient experiencing the event during follow-up.                                                                                                                                                                                    |
| <b>Events (%)</b>     | % of events during follow-up.                                                                                                                                                                                                                 |
| <b>HR</b>             | Hazard ratio, relative to lowest category indicated by “----”, based on Cox PH model.                                                                                                                                                         |
| <b>HR 95% LCL</b>     | 95% lower confidence limit on HR, from Cox PH model.                                                                                                                                                                                          |
| <b>HR 95% UCL</b>     | 95% upper confidence limit on HR, from Cox PH model.                                                                                                                                                                                          |
| <b>Wald Pvalue</b>    | Tests single coefficient in the Cox PH model.                                                                                                                                                                                                 |
| <b>Median (yrs.)</b>  | Median time to event in each category.                                                                                                                                                                                                        |
| <b>Median 95% LCL</b> | 95% lower confidence limit on median time to event.                                                                                                                                                                                           |
| <b>Median 95% UCL</b> | 95% upper confidence limit on median time to event, blank if infinite.                                                                                                                                                                        |
| <b>LR pvalue</b>      | Likelihood ratio test of Cox PH model; tests single parameter in binary-split model.                                                                                                                                                          |
| <b>Logrank pvalue</b> | Logrank test, of equality of time-to-event distributions across all categories.                                                                                                                                                               |
| <b>DevLIN pvalue</b>  | Test for deviations from linearity: first fit univariate quantitative linear model, then perform LR test for significance of adding the same predictor categorized as Quintiles, Quartiles, Tertiles, or binary split via profile likelihood. |
