# Supplementary material
Source: PubMed Central journal article supplement (PMC3262037)
Supplement: supp_185.1.67_Richards_ODS_tables.pdf [file supp_185.1.67_Richards_ODS_tables.pdf]

## Univariate Results Tables

**Cohort: Derivation**  
**Outcome: Mortality**  
**Predictor: Age (years)**

|                           | Patients<br>(N) | Events<br>(n) | Events<br>(%) | HR    | HR<br>95% LCL | HR<br>95% UCL | Wald<br>pvalue | Median<br>(yrs.) | Median<br>95% LCL | Median<br>95% UCL | LR<br>pvalue | Logrank<br>pvalue | DevLIN<br>pvalue |
|---------------------------|-----------------|---------------|---------------|-------|---------------|---------------|----------------|------------------|-------------------|-------------------|--------------|-------------------|------------------|
| <b>Quintiles</b>          |                 |               |               |       |               |               |                |                  |                   |                   |              |                   |                  |
| < 59.5                    | 28              | 10            | 35.71         | ----  | ----          | ----          | ----           | 4.60             | 2.850             |                   | 9.70e-02     | 8.77e-02          | 4.42e-02         |
| [ 59.5,66.1)              | 28              | 12            | 42.86         | 1.744 | 7.497e-01     | 4.055         | 1.967e-01      | 1.95             | 8.378e-01         |                   |              |                   |                  |
| [ 66.1,69.7)              | 28              | 13            | 46.43         | 1.149 | 5.030e-01     | 2.625         | 7.417e-01      | 4.86             | 2.075             |                   |              |                   |                  |
| [ 69.7,73.9)              | 28              | 15            | 53.57         | 1.678 | 7.433e-01     | 3.786         | 2.129e-01      | 3.26             | 9.500e-01         |                   |              |                   |                  |
| ≥ 73.9                    | 28              | 23            | 82.14         | 2.484 | 1.173         | 5.260         | 1.750e-02      | 2.30             | 1.144             | 3.031             |              |                   |                  |
| <b>Quartiles</b>          |                 |               |               |       |               |               |                |                  |                   |                   |              |                   |                  |
| < 61.2                    | 35              | 13            | 37.14         | ----  | ----          | ----          | ----           | 4.60             | 1.947             |                   | 7.94e-02     | 6.33e-02          | 1.77e-01         |
| [ 61.2,68.5)              | 35              | 17            | 48.57         | 1.356 | 6.578e-01     | 2.794         | 4.094e-01      | 2.34             | 9.309e-01         |                   |              |                   |                  |
| [ 68.5,73.3)              | 35              | 17            | 48.57         | 1.052 | 5.096e-01     | 2.170         | 8.919e-01      | 4.02             | 2.034             |                   |              |                   |                  |
| ≥ 73.3                    | 35              | 26            | 74.29         | 2.108 | 1.076         | 4.129         | 2.967e-02      | 2.13             | 8.077e-01         | 3.031             |              |                   |                  |
| <b>Tertiles</b>           |                 |               |               |       |               |               |                |                  |                   |                   |              |                   |                  |
| < 64.7                    | 47              | 18            | 38.30         | ----  | ----          | ----          | ----           | 4.60             | 1.947             |                   | 3.46e-02     | 2.91e-02          | 5.66e-02         |
| [ 64.7,71.3)              | 46              | 21            | 45.65         | 1.112 | 5.911e-01     | 2.091         | 7.421e-01      | 3.03             | 2.075             |                   |              |                   |                  |
| ≥ 71.3                    | 47              | 34            | 72.34         | 1.978 | 1.102         | 3.548         | 2.219e-02      | 2.13             | 1.144             | 3.751             |              |                   |                  |
| <b>Profile Likelihood</b> |                 |               |               |       |               |               |                |                  |                   |                   |              |                   |                  |
| <73.7                     | 109             | 47            | 43.12         | ----  | ----          | ----          | ----           | 3.26             | 2.341             | 5.522             | 3.92e-03     | 2.11e-03          | 1.39e-02         |
| ≥73.7                     | 31              | 26            | 83.87         | 2.107 | 1.296         | 3.428         | 2.666e-03      | 2.13             | 7.940e-01         | 2.853             |              |                   |                  |
| <b>Quantitative</b>       |                 |               |               |       |               |               |                |                  |                   |                   |              |                   |                  |
|                           | 140             | 73            | 52.14         | 1.027 | 9.944e-01     | 1.061         | 1.051e-01      |                  |                   |                   | 1.011e-01    | 1.043e-01         |                  |
| <b>Predictor: Gender</b>  |                 |               |               |       |               |               |                |                  |                   |                   |              |                   |                  |
| Female                    | 39              | 16            | 41.03         | ----  | ----          | ----          | ----           | 4.60             | 2.610             |                   |              |                   |                  |
| Male                      | 101             | 57            | 56.44         | 1.94  | 1.104         | 3.401         | 2.12E-02       | 2.34             | 1.140             | 3.26              | 1.49E-02     | 1.90E-02          |                  |

**Cohort: Derivation**  
**Outcome: Mortality**  
**Predictor: Baseline (4-month) FVC % Predicted**

|                           | Patients<br>(N) | Events<br>(n) | Events<br>(%) | HR        | HR<br>95% LCL | HR<br>95% UCL | Wald<br>pvalue | Median<br>(yrs.) | Median<br>95% LCL | Median<br>95% UCL | LR<br>pvalue | Logrank<br>pvalue | DevLIN<br>pvalue |
|---------------------------|-----------------|---------------|---------------|-----------|---------------|---------------|----------------|------------------|-------------------|-------------------|--------------|-------------------|------------------|
| <b>Quintiles</b>          |                 |               |               |           |               |               |                |                  |                   |                   |              |                   |                  |
| < 43.3                    | 24              | 16            | 66.67         | ----      | ----          | ----          | ----           | 0.84             | 5.010e-01         |                   | 1.48e-04     | 1.40e-05          | 3.90e-02         |
| [ 43.3,56.6)              | 24              | 10            | 41.67         | 2.108e-01 | 8.660e-02     | 5.131e-01     | 6.026e-04      | 2.85             | 2.606             |                   |              |                   |                  |
| [ 56.6,66)                | 24              | 10            | 41.67         | 3.014e-01 | 1.346e-01     | 6.750e-01     | 3.548e-03      | 3.03             | 8.405e-01         |                   |              |                   |                  |
| [ 66,77)                  | 24              | 13            | 54.17         | 4.060e-01 | 1.924e-01     | 8.570e-01     | 1.803e-02      | 2.08             | 1.596             |                   |              |                   |                  |
| ≥ 77                      | 25              | 11            | 44.00         | 1.404e-01 | 6.018e-02     | 3.274e-01     | 5.535e-06      | 4.15             | 4.022             |                   |              |                   |                  |
| <b>Quartiles</b>          |                 |               |               |           |               |               |                |                  |                   |                   |              |                   |                  |
| < 47.8                    | 30              | 20            | 66.67         | ----      | ----          | ----          | ----           | 1.70             | 5.010e-01         | 2.341             | 2.16e-04     | 4.39e-05          | 8.81e-02         |
| [ 47.8,61.1)              | 30              | 12            | 40.00         | 3.122e-01 | 1.476e-01     | 6.605e-01     | 2.329e-03      | 3.03             | 2.606             |                   |              |                   |                  |
| [ 61.1,74)                | 29              | 15            | 51.72         | 4.904e-01 | 2.468e-01     | 9.744e-01     | 4.196e-02      | 2.08             | 1.396             |                   |              |                   |                  |
| ≥ 74                      | 32              | 13            | 40.62         | 2.116e-01 | 1.031e-01     | 4.344e-01     | 2.311e-05      | 4.15             | 4.022             |                   |              |                   |                  |
| <b>Tertiles</b>           |                 |               |               |           |               |               |                |                  |                   |                   |              |                   |                  |
| < 52.8                    | 40              | 21            | 52.50         | ----      | ----          | ----          | ----           | 2.13             | 8.378e-01         |                   | 1.96e-02     | 2.07e-02          | 3.04e-01         |
| [ 52.8,69.9)              | 41              | 21            | 51.22         | 8.291e-01 | 4.393e-01     | 1.565         | 5.629e-01      | 2.85             | 1.396             |                   |              |                   |                  |
| ≥ 69.9                    | 40              | 18            | 45.00         | 4.226e-01 | 2.207e-01     | 8.093e-01     | 9.366e-03      | 4.04             | 3.751             |                   |              |                   |                  |
| <b>Profile Likelihood</b> |                 |               |               |           |               |               |                |                  |                   |                   |              |                   |                  |
| < 43.6                    | 25              | 17            | 68.00         | ----      | ----          | ----          | ----           | 0.84             | 3.587e-01         | 2.300             | 1.70e-05     | 3.29e-07          | 1.01e-02         |
| ≥ 43.6                    | 96              | 43            | 44.79         | 2.339e-01 | 1.278e-01     | 4.281e-01     | 2.480e-06      | 3.75             | 2.853             | 4.860             |              |                   |                  |
| <b>Quantitative</b>       | 121             | 60            | 49.59         | 9.742e-01 | 9.600e-01     | 9.885e-01     | 4.463e-04      |                  |                   |                   | 2.887e-04    | 4.093e-04         |                  |

**Cohort: Derivation**  
**Outcome: Mortality**  
**Predictor: Baseline (4-month) DLco % Predicted**

|                           | Patients<br>(N) | Events<br>(n) | Events<br>(%) | HR        | HR<br>95% LCL | HR<br>95% UCL | Wald<br>pvalue | Median<br>(yrs.) | Median<br>95% LCL | Median<br>95% UCL | LR<br>pvalue | Logrank<br>pvalue | DevLIN<br>pvalue |
|---------------------------|-----------------|---------------|---------------|-----------|---------------|---------------|----------------|------------------|-------------------|-------------------|--------------|-------------------|------------------|
| <b>Quintiles</b>          |                 |               |               |           |               |               |                |                  |                   |                   |              |                   |                  |
| < 28.9                    | 22              | 13            | 59.09         | ----      | ----          | ----          | ----           | 0.95             | 8.378e-01         |                   | 6.05e-04     | 2.34e-04          | 7.71e-01         |
| [ 28.9,39)                | 22              | 13            | 59.09         | 4.569e-01 | 1.971e-01     | 1.059         | 6.788e-02      | 2.08             | 8.241e-01         |                   |              |                   |                  |
| [ 39,49.4)                | 21              | 11            | 52.38         | 4.300e-01 | 1.907e-01     | 9.692e-01     | 4.181e-02      | 2.34             | 2.034             |                   |              |                   |                  |
| [ 49.4,60)                | 22              | 9             | 40.91         | 2.910e-01 | 1.227e-01     | 6.901e-01     | 5.078e-03      | 3.75             | 2.850             |                   |              |                   |                  |
| ≥ 60                      | 22              | 7             | 31.82         | 1.335e-01 | 5.081e-02     | 3.509e-01     | 4.418e-05      | 4.62             | 4.153             |                   |              |                   |                  |
| <b>Quartiles</b>          |                 |               |               |           |               |               |                |                  |                   |                   |              |                   |                  |
| < 31.6                    | 27              | 18            | 66.67         | ----      | ----          | ----          | ----           | 1.40             | 9.062e-01         | 3.031             | 7.49e-04     | 4.26e-04          | 9.81e-01         |
| [ 31.6,43.8)              | 27              | 13            | 48.15         | 5.829e-01 | 2.773e-01     | 1.225         | 1.545e-01      | 2.61             | 8.405e-01         |                   |              |                   |                  |
| [ 43.8,57)                | 26              | 13            | 50.00         | 4.183e-01 | 2.021e-01     | 8.659e-01     | 1.888e-02      | 3.26             | 2.130             |                   |              |                   |                  |
| ≥ 57                      | 29              | 9             | 31.03         | 2.016e-01 | 8.941e-02     | 4.547e-01     | 1.135e-04      | 4.62             | 4.153             |                   |              |                   |                  |
| <b>Tertiles</b>           |                 |               |               |           |               |               |                |                  |                   |                   |              |                   |                  |
| < 36.6                    | 36              | 22            | 61.11         | ----      | ----          | ----          | ----           | 1.40             | 8.378e-01         | 2.932             | 7.60e-05     | 1.70e-05          | 4.76e-01         |
| [ 36.6,53.4)              | 37              | 19            | 51.35         | 3.990e-01 | 2.116e-01     | 7.526e-01     | 4.536e-03      | 3.03             | 2.034             |                   |              |                   |                  |
| ≥ 53.4                    | 36              | 12            | 33.33         | 2.125e-01 | 1.035e-01     | 4.361e-01     | 2.423e-05      | 4.62             | 4.153             |                   |              |                   |                  |
| <b>Profile Likelihood</b> |                 |               |               |           |               |               |                |                  |                   |                   |              |                   |                  |
| <37.8                     | 39              | 24            | 61.54         | ----      | ----          | ----          | ----           | 0.95             | 8.241e-01         | 2.853             | 5.74e-06     | 4.01e-07          | 5.35e-02         |
| ≥37.8                     | 70              | 29            | 41.43         | 2.573e-01 | 1.467e-01     | 4.514e-01     | 2.205e-06      | 4.04             | 3.261             |                   |              |                   |                  |
| <b>Quantitative</b>       | 109             | 53            | 48.62         | 9.626e-01 | 9.453e-01     | 9.801e-01     | 3.529e-05      |                  |                   |                   | 2.421e-05    | 2.375e-05         |                  |

**Cohort: Derivation**  
**Outcome: Mortality**  
**Predictor: Baseline (4-month) CPI**

|                           | Patients<br>(N) | Events<br>(n) | Events<br>(%) | HR    | HR<br>95% LCL | HR<br>95% UCL | Wald<br>pvalue | Median<br>(yrs.) | Median<br>95% LCL | Median<br>95% UCL | LR<br>pvalue | Logrank<br>pvalue | DevLIN<br>pvalue |
|---------------------------|-----------------|---------------|---------------|-------|---------------|---------------|----------------|------------------|-------------------|-------------------|--------------|-------------------|------------------|
| <b>Quintiles</b>          |                 |               |               |       |               |               |                |                  |                   |                   |              |                   |                  |
| < 43                      | 22              | 6             | 27.27         | ----  | ----          | ----          | ----           | 5.52             | 4.616             |                   | 1.01e-04     | 4.54e-05          | 5.98e-01         |
| [ 43,50.8)                | 22              | 10            | 45.45         | 2.528 | 9.074e-01     | 7.041         | 7.605e-02      | 4.04             | 2.034             |                   |              |                   |                  |
| [ 50.8,58.7)              | 21              | 12            | 57.14         | 2.793 | 1.026         | 7.606         | 4.444e-02      | 3.03             | 2.075             |                   |              |                   |                  |
| [ 58.7,64.5)              | 22              | 11            | 50.00         | 6.641 | 2.343         | 1.883e+01     | 3.689e-04      | 1.70             | 9.309e-01         |                   |              |                   |                  |
| ≥ 64.5                    | 22              | 14            | 63.64         | 7.513 | 2.837         | 1.989e+01     | 4.938e-05      | 1.71             | 3.313e-01         |                   |              |                   |                  |
| <b>Quartiles</b>          |                 |               |               |       |               |               |                |                  |                   |                   |              |                   |                  |
| < 44.4                    | 27              | 7             | 25.93         | ----  | ----          | ----          | ----           | 5.52             | 4.616             |                   | 9.09e-05     | 3.87e-05          | 8.14e-01         |
| [ 44.4,56)                | 27              | 14            | 51.85         | 2.652 | 1.061         | 6.628         | 3.691e-02      | 3.75             | 2.034             |                   |              |                   |                  |
| [ 56,62.7)                | 27              | 16            | 59.26         | 3.476 | 1.403         | 8.614         | 7.121e-03      | 2.34             | 1.703             |                   |              |                   |                  |
| ≥ 62.7                    | 28              | 16            | 57.14         | 7.247 | 2.931         | 1.792e+01     | 1.803e-05      | 0.91             | 3.313e-01         |                   |              |                   |                  |
| <b>Tertiles</b>           |                 |               |               |       |               |               |                |                  |                   |                   |              |                   |                  |
| < 47.7                    | 36              | 12            | 33.33         | ----  | ----          | ----          | ----           | 4.62             | 4.044             |                   | 1.05e-04     | 4.06e-05          | 9.10e-01         |
| [ 47.7,59.8)              | 37              | 21            | 56.76         | 2.215 | 1.073         | 4.573         | 3.159e-02      | 3.03             | 2.075             |                   |              |                   |                  |
| ≥ 59.8                    | 36              | 20            | 55.56         | 4.883 | 2.326         | 1.025e+01     | 2.793e-05      | 1.40             | 8.378e-01         | 2.932             |              |                   |                  |
| <b>Profile Likelihood</b> |                 |               |               |       |               |               |                |                  |                   |                   |              |                   |                  |
| <58.9                     | 66              | 28            | 42.42         | ----  | ----          | ----          | ----           | 4.04             | 3.751             |                   | 1.86e-05     | 3.28e-06          | 2.23e-01         |
| ≥58.9                     | 43              | 25            | 58.14         | 3.621 | 2.039         | 6.433         | 1.134e-05      | 1.70             | 9.062e-01         | 2.853             |              |                   |                  |
| <b>Quantitative</b>       | 109             | 53            | 48.62         | 1.058 | 1.032         | 1.084         | 7.950e-06      |                  |                   |                   | 4.080e-06    | 5.979e-06         |                  |

**Cohort: Derivation**  
**Outcome: Mortality**  
**Predictor: Baseline (3-month) FVC % Predicted**

|                           | Patients<br>(N) | Events<br>(n) | Events<br>(%) | HR        | HR<br>95% LCL | HR<br>95% UCL | Wald<br>pvalue | Median<br>(yrs.) | Median<br>95% LCL | Median<br>95% UCL | LR<br>pvalue | Logrank<br>pvalue | DevLIN<br>pvalue |
|---------------------------|-----------------|---------------|---------------|-----------|---------------|---------------|----------------|------------------|-------------------|-------------------|--------------|-------------------|------------------|
| <b>Quintiles</b>          |                 |               |               |           |               |               |                |                  |                   |                   |              |                   |                  |
| < 43.1                    | 22              | 14            | 63.64         | ----      | ----          | ----          | ----           | 1.70             | 3.313e-01         |                   | 4.37e-04     | 6.20e-05          | 3.73e-02         |
| [ 43.1,56.5)              | 21              | 7             | 33.33         | 1.695e-01 | 5.888e-02     | 4.881e-01     | 1.005e-03      | 4.86             | 3.261             |                   |              |                   |                  |
| [ 56.5,65.7)              | 22              | 9             | 40.91         | 3.038e-01 | 1.293e-01     | 7.138e-01     | 6.263e-03      | 0.00             | 8.405e-01         |                   |              |                   |                  |
| [ 65.7,76.7)              | 21              | 11            | 52.38         | 4.186e-01 | 1.867e-01     | 9.387e-01     | 3.456e-02      | 2.85             | 1.947             |                   |              |                   |                  |
| ≥ 76.7                    | 22              | 9             | 40.91         | 1.390e-01 | 5.467e-02     | 3.533e-01     | 3.392e-05      | 4.62             | 4.022             |                   |              |                   |                  |
| <b>Quartiles</b>          |                 |               |               |           |               |               |                |                  |                   |                   |              |                   |                  |
| < 47.8                    | 27              | 17            | 62.96         | ----      | ----          | ----          | ----           | 1.70             | 3.587e-01         |                   | 4.27e-04     | 1.07e-04          | 6.36e-02         |
| [ 47.8,60.5)              | 27              | 9             | 33.33         | 2.659e-01 | 1.126e-01     | 6.276e-01     | 2.505e-03      | 3.26             | 3.034             |                   |              |                   |                  |
| [ 60.5,73.4)              | 27              | 14            | 51.85         | 5.032e-01 | 2.430e-01     | 1.042         | 6.449e-02      | 2.85             | 9.062e-01         |                   |              |                   |                  |
| ≥ 73.4                    | 27              | 10            | 37.04         | 2.000e-01 | 8.946e-02     | 4.471e-01     | 8.810e-05      | 4.62             | 4.022             |                   |              |                   |                  |
| <b>Tertiles</b>           |                 |               |               |           |               |               |                |                  |                   |                   |              |                   |                  |
| < 52.4                    | 36              | 18            | 50.00         | ----      | ----          | ----          | ----           | 2.13             | 1.703             |                   | 6.96e-02     | 6.71e-02          | 2.47e-01         |
| [ 52.4,69.6)              | 36              | 16            | 44.44         | 7.440e-01 | 3.671e-01     | 1.508         | 4.120e-01      | 3.03             | 9.062e-01         |                   |              |                   |                  |
| ≥ 69.6                    | 36              | 16            | 44.44         | 4.481e-01 | 2.233e-01     | 8.993e-01     | 2.390e-02      | 4.02             | 3.751             |                   |              |                   |                  |
| <b>Profile Likelihood</b> |                 |               |               |           |               |               |                |                  |                   |                   |              |                   |                  |
| < 43.6                    | 23              | 15            | 65.22         | ----      | ----          | ----          | ----           | 1.70             | 3.313e-01         |                   | 4.82e-05     | 1.50e-06          | 1.24e-02         |
| ≥ 43.6                    | 85              | 35            | 41.18         | 2.287e-01 | 1.190e-01     | 4.394e-01     | 9.556e-06      | 4.02             | 3.034             |                   |              |                   |                  |
| <b>Quantitative</b>       |                 |               |               |           |               |               |                |                  |                   |                   |              |                   |                  |
|                           | 108             | 50            | 46.30         | 9.743e-01 | 9.589e-01     | 9.899e-01     | 1.330e-03      |                  |                   |                   | 9.357e-04    | 1.254e-03         |                  |

**Cohort: Derivation**  
**Outcome: Mortality**  
**Predictor: Baseline (3-month) DLco % Predicted**

|                           | Patients<br>(N) | Events<br>(n) | Events<br>(%) | HR        | HR<br>95% LCL | HR<br>95% UCL | Wald<br>pvalue | Median<br>(yrs.) | Median<br>95% LCL | Median<br>95% UCL | LR<br>pvalue | Logrank<br>pvalue | DevLIN<br>pvalue |
|---------------------------|-----------------|---------------|---------------|-----------|---------------|---------------|----------------|------------------|-------------------|-------------------|--------------|-------------------|------------------|
| <b>Quintiles</b>          |                 |               |               |           |               |               |                |                  |                   |                   |              |                   |                  |
| < 28.6                    | 19              | 12            | 63.16         | ----      | ----          | ----          | ----           | 0.95             | 9.062e-01         |                   | 3.51e-04     | 5.43e-05          | 2.47e-01         |
| [ 28.6,38)                | 18              | 9             | 50.00         | 5.867e-01 | 2.412e-01     | 1.427         | 2.397e-01      | 2.93             | 5.530e-01         |                   |              |                   |                  |
| [ 38,49.9)                | 20              | 10            | 50.00         | 2.827e-01 | 1.158e-01     | 6.900e-01     | 5.523e-03      | 3.03             | 1.703             |                   |              |                   |                  |
| [ 49.9,61)                | 19              | 7             | 36.84         | 2.488e-01 | 9.659e-02     | 6.409e-01     | 3.956e-03      | 3.75             | 1.947             |                   |              |                   |                  |
| ≥ 61                      | 20              | 6             | 30.00         | 1.225e-01 | 4.408e-02     | 3.404e-01     | 5.666e-05      | 4.62             | 4.153             |                   |              |                   |                  |
| <b>Quartiles</b>          |                 |               |               |           |               |               |                |                  |                   |                   |              |                   |                  |
| < 31.4                    | 24              | 15            | 62.50         | ----      | ----          | ----          | ----           | 1.71             | 9.309e-01         |                   | 1.00e-03     | 1.07e-03          | 7.62e-01         |
| [ 31.4,41.3)              | 24              | 11            | 45.83         | 5.960e-01 | 2.630e-01     | 1.351         | 2.152e-01      | 2.93             | 6.407e-01         |                   |              |                   |                  |
| [ 41.3,57.2)              | 24              | 12            | 50.00         | 5.069e-01 | 2.332e-01     | 1.102         | 8.625e-02      | 3.26             | 1.947             |                   |              |                   |                  |
| ≥ 57.2                    | 24              | 6             | 25.00         | 1.659e-01 | 6.355e-02     | 4.329e-01     | 2.419e-04      | 4.62             | 4.153             |                   |              |                   |                  |
| <b>Tertiles</b>           |                 |               |               |           |               |               |                |                  |                   |                   |              |                   |                  |
| < 34.5                    | 32              | 19            | 59.38         | ----      | ----          | ----          | ----           | 1.71             | 9.062e-01         | 3.031             | 2.18e-04     | 6.79e-05          | 6.31e-01         |
| [ 34.5,54.3)              | 32              | 15            | 46.88         | 4.156e-01 | 2.056e-01     | 8.397e-01     | 1.441e-02      | 3.03             | 1.947             |                   |              |                   |                  |
| ≥ 54.3                    | 32              | 10            | 31.25         | 2.047e-01 | 9.362e-02     | 4.476e-01     | 7.078e-05      | 4.62             | 4.153             |                   |              |                   |                  |
| <b>Profile Likelihood</b> |                 |               |               |           |               |               |                |                  |                   |                   |              |                   |                  |
| <37.8                     | 36              | 21            | 58.33         | ----      | ----          | ----          | ----           | 1.71             | 9.062e-01         | 3.031             | 1.92e-05     | 2.07e-06          | 8.72e-02         |
| ≥37.8                     | 60              | 23            | 38.33         | 2.484e-01 | 1.339e-01     | 4.607e-01     | 9.940e-06      | 4.15             | 3.751             |                   |              |                   |                  |
| <b>Quantitative</b>       | 96              | 44            | 45.83         | 9.614e-01 | 9.427e-01     | 9.804e-01     | 8.338e-05      |                  |                   |                   | 5.229e-05    | 5.067e-05         |                  |

**Cohort: Derivation**  
**Outcome: Mortality**  
**Predictor: Baseline (3-month) CPI**

|                           | Patients<br>(N) | Events<br>(n) | Events<br>(%) | HR    | HR<br>95% LCL | HR<br>95% UCL | Wald<br>pvalue | Median<br>(yrs.) | Median<br>95% LCL | Median<br>95% UCL | LR<br>pvalue | Logrank<br>pvalue | DevLIN<br>pvalue |
|---------------------------|-----------------|---------------|---------------|-------|---------------|---------------|----------------|------------------|-------------------|-------------------|--------------|-------------------|------------------|
| <b>Quintiles</b>          |                 |               |               |       |               |               |                |                  |                   |                   |              |                   |                  |
| < 42.8                    | 19              | 5             | 26.32         | ----  | ----          | ----          | ----           | 5.52             | 4.616             |                   | 6.64e-04     | 2.65e-04          | 8.20e-01         |
| [ 42.8,51.5)              | 19              | 8             | 42.11         | 2.402 | 7.735e-01     | 7.462         | 1.296e-01      | 4.15             | 2.034             |                   |              |                   |                  |
| [ 51.5,59)                | 19              | 10            | 52.63         | 2.576 | 8.582e-01     | 7.731         | 9.156e-02      | 3.75             | 2.075             |                   |              |                   |                  |
| [ 59,65.1)                | 19              | 8             | 42.11         | 5.744 | 1.784         | 1.850e+01     | 3.388e-03      | 1.70             | 9.309e-01         |                   |              |                   |                  |
| ≥ 65.1                    | 20              | 13            | 65.00         | 7.665 | 2.676         | 2.196e+01     | 1.490e-04      | 1.71             | 2.300e-01         |                   |              |                   |                  |
| <b>Quartiles</b>          |                 |               |               |       |               |               |                |                  |                   |                   |              |                   |                  |
| < 44.3                    | 24              | 6             | 25.00         | ----  | ----          | ----          | ----           | 5.52             | 4.616             |                   | 5.19e-04     | 3.58e-04          | 9.56e-01         |
| [ 44.3,56.1)              | 24              | 11            | 45.83         | 2.690 | 9.831e-01     | 7.361         | 5.399e-02      | 3.75             | 2.034             |                   |              |                   |                  |
| [ 56.1,62.8)              | 24              | 14            | 58.33         | 3.810 | 1.433         | 1.013e+01     | 7.326e-03      | 2.13             | 9.500e-01         |                   |              |                   |                  |
| ≥ 62.8                    | 24              | 13            | 54.17         | 6.917 | 2.581         | 1.854e+01     | 1.206e-04      | 1.71             | 3.313e-01         |                   |              |                   |                  |
| <b>Tertiles</b>           |                 |               |               |       |               |               |                |                  |                   |                   |              |                   |                  |
| < 47.6                    | 32              | 10            | 31.25         | ----  | ----          | ----          | ----           | 4.62             | 4.153             |                   | 7.36e-04     | 3.88e-04          | 8.65e-01         |
| [ 47.6,59.9)              | 32              | 18            | 56.25         | 2.235 | 1.017         | 4.910         | 4.519e-02      | 3.03             | 2.034             |                   |              |                   |                  |
| ≥ 59.9                    | 32              | 16            | 50.00         | 4.702 | 2.079         | 1.063e+01     | 2.004e-04      | 1.71             | 9.062e-01         |                   |              |                   |                  |
| <b>Profile Likelihood</b> |                 |               |               |       |               |               |                |                  |                   |                   |              |                   |                  |
| <58.9                     | 57              | 23            | 40.35         | ----  | ----          | ----          | ----           | 4.15             | 3.751             |                   | 9.49e-05     | 2.37e-05          | 3.70e-01         |
| ≥58.9                     | 39              | 21            | 53.85         | 3.631 | 1.927         | 6.842         | 6.653e-05      | 1.71             | 9.062e-01         | 3.031             |              |                   |                  |
| <b>Quantitative</b>       | 96              | 44            | 45.83         | 1.059 | 1.031         | 1.088         | 2.703e-05      |                  |                   |                   | 1.273e-05    | 1.834e-05         |                  |

Cohort: **Derivation**  
 Outcome: **Mortality**  
 Predictor: **MMP7 ( ng / mL )**

|                           | Patients<br>(N) | Events<br>(n) | Events<br>(%) | HR        | HR<br>95% LCL | HR<br>95% UCL | Wald<br>pvalue | Median<br>(yrs.) | Median<br>95% LCL | Median<br>95% UCL | LR<br>pvalue | Logrank<br>pvalue | DevLIN<br>pvalue |
|---------------------------|-----------------|---------------|---------------|-----------|---------------|---------------|----------------|------------------|-------------------|-------------------|--------------|-------------------|------------------|
| <b>Quintiles</b>          |                 |               |               |           |               |               |                |                  |                   |                   |              |                   |                  |
| < 2.7                     | 27              | 12            | 44.44         | ----      | ----          | ----          | ----           | 2.61             | 1.703             |                   | 3.74e-02     | 2.10e-02          | 4.80e-02         |
| [ 2.7,3.76)               | 26              | 10            | 38.46         | 6.862e-01 | 2.954e-01     | 1.594         | 3.813e-01      | 4.04             | 3.031             |                   |              |                   |                  |
| [ 3.76,4.99)              | 27              | 12            | 44.44         | 8.822e-01 | 3.928e-01     | 1.981         | 7.614e-01      | 4.15             | 1.112             |                   |              |                   |                  |
| [ 4.99,6.41)              | 26              | 19            | 73.08         | 2.169     | 1.048         | 4.490         | 3.692e-02      | 1.60             | 5.284e-01         | 3.261             |              |                   |                  |
| ≥ 6.41                    | 27              | 15            | 55.56         | 1.179     | 5.493e-01     | 2.531         | 6.725e-01      | 2.61             | 9.500e-01         |                   |              |                   |                  |
| <b>Quartiles</b>          |                 |               |               |           |               |               |                |                  |                   |                   |              |                   |                  |
| < 2.92                    | 33              | 15            | 45.45         | ----      | ----          | ----          | ----           | 3.03             | 2.431             |                   | 8.57e-03     | 6.10e-03          | 7.08e-03         |
| [ 2.92,4.3)               | 33              | 11            | 33.33         | 7.759e-01 | 3.557e-01     | 1.693         | 5.237e-01      | 5.52             | 4.044             |                   |              |                   |                  |
| [ 4.3,5.73)               | 33              | 22            | 66.67         | 2.397     | 1.231         | 4.670         | 1.017e-02      | 1.95             | 7.392e-01         | 3.261             |              |                   |                  |
| ≥ 5.73                    | 34              | 20            | 58.82         | 1.556     | 7.945e-01     | 3.048         | 1.974e-01      | 2.61             | 9.500e-01         |                   |              |                   |                  |
| <b>Tertiles</b>           |                 |               |               |           |               |               |                |                  |                   |                   |              |                   |                  |
| < 3.51                    | 44              | 18            | 40.91         | ----      | ----          | ----          | ----           | 4.04             | 2.606             |                   | 8.68e-02     | 9.15e-02          | 5.46e-02         |
| [ 3.51,5.35)              | 45              | 22            | 48.89         | 1.545     | 8.275e-01     | 2.885         | 1.721e-01      | 2.30             | 9.062e-01         |                   |              |                   |                  |
| ≥ 5.35                    | 44              | 28            | 63.64         | 1.919     | 1.060         | 3.475         | 3.147e-02      | 2.13             | 9.500e-01         | 3.261             |              |                   |                  |
| <b>Profile Likelihood</b> |                 |               |               |           |               |               |                |                  |                   |                   |              |                   |                  |
| < 4.3                     | 66              | 26            | 39.39         | ----      | ----          | ----          | ----           | 4.62             | 2.664             |                   | 2.23e-03     | 2.12e-03          | 5.27e-04         |
| ≥ 4.3                     | 67              | 42            | 62.69         | 2.130     | 1.300         | 3.490         | 2.678e-03      | 2.03             | 9.309e-01         | 2.932             |              |                   |                  |
| <b>Quantitative</b>       |                 |               |               |           |               |               |                |                  |                   |                   |              |                   |                  |
|                           | 133             | 68            | 51.13         | 1.035     | 0.9642        | 1.110         | 3.435e-01      |                  |                   |                   | 3.548e-01    | 3.428e-01         |                  |



Cohort: Derivation  
 Outcome: Mortality  
 Predictor: ICAM1 ( ng / mL )

|                           | Patients<br>(N) | Events<br>(n) | Events<br>(%) | HR        | HR<br>95% LCL | HR<br>95% UCL | Wald<br>pvalue | Median<br>(yrs.) | Median<br>95% LCL | Median<br>95% UCL | LR<br>pvalue | Logrank<br>pvalue | DevLIN<br>pvalue |
|---------------------------|-----------------|---------------|---------------|-----------|---------------|---------------|----------------|------------------|-------------------|-------------------|--------------|-------------------|------------------|
| <b>Quintiles</b>          |                 |               |               |           |               |               |                |                  |                   |                   |              |                   |                  |
| < 158                     | 28              | 14            | 50.00         | ----      | ----          | ----          | ----           | 4.02             | 1.144             |                   | 3.78e-02     | 4.49e-02          | 6.26e-02         |
| [ 158,205)                | 28              | 9             | 32.14         | 5.455e-01 | 2.312e-01     | 1.287         | 1.664e-01      | 5.55             | 2.664             |                   |              |                   |                  |
| [ 205,252)                | 28              | 16            | 57.14         | 1.844     | 8.953e-01     | 3.800         | 9.689e-02      | 1.60             | 7.940e-01         |                   |              |                   |                  |
| [ 252,351)                | 28              | 14            | 50.00         | 1.519     | 7.195e-01     | 3.207         | 2.728e-01      | 2.13             | 9.500e-01         |                   |              |                   |                  |
| ≥ 351                     | 28              | 20            | 71.43         | 1.169     | 5.748e-01     | 2.377         | 6.665e-01      | 2.85             | 8.405e-01         | 4.616             |              |                   |                  |
| <b>Quartiles</b>          |                 |               |               |           |               |               |                |                  |                   |                   |              |                   |                  |
| < 175                     | 33              | 15            | 45.45         | ----      | ----          | ----          | ----           | 4.02             | 1.703             |                   | 4.73e-01     | 4.84e-01          | 7.74e-01         |
| [ 175,230)                | 37              | 17            | 45.95         | 1.290     | 6.392e-01     | 2.605         | 4.768e-01      | 2.61             | 9.309e-01         |                   |              |                   |                  |
| [ 230,318)                | 35              | 15            | 42.86         | 1.481     | 7.210e-01     | 3.043         | 2.848e-01      | 2.61             | 1.087             |                   |              |                   |                  |
| ≥ 318                     | 35              | 26            | 74.29         | 1.636     | 8.592e-01     | 3.114         | 1.342e-01      | 2.08             | 8.405e-01         | 4.085             |              |                   |                  |
| <b>Tertiles</b>           |                 |               |               |           |               |               |                |                  |                   |                   |              |                   |                  |
| < 197                     | 47              | 19            | 40.43         | ----      | ----          | ----          | ----           | 4.02             | 2.431             |                   | 4.07e-02     | 4.64e-02          | 8.19e-02         |
| [ 197,274)                | 46              | 25            | 54.35         | 2.055     | 1.128         | 3.744         | 1.855e-02      | 2.34             | 9.309e-01         |                   |              |                   |                  |
| ≥ 274                     | 47              | 29            | 61.70         | 1.758     | 9.813e-01     | 3.151         | 5.786e-02      | 2.85             | 1.087             | 4.085             |              |                   |                  |
| <b>Profile Likelihood</b> |                 |               |               |           |               |               |                |                  |                   |                   |              |                   |                  |
| <202.5                    | 53              | 20            | 37.74         | ----      | ----          | ----          | ----           | 4.04             | 2.664             |                   | 1.14e-03     | 1.49e-03          | 8.61e-04         |
| ≥202.5                    | 87              | 53            | 60.92         | 2.265     | 1.350         | 3.802         | 1.965e-03      | 2.08             | 9.500e-01         | 3.031             |              |                   |                  |
| <b>Quantitative</b>       | 140             | 73            | 52.14         | 1.001     | 9.995e-01     | 1.002         | 2.234e-01      |                  |                   |                   | 2.367e-01    | 2.225e-01         |                  |

Cohort: **Derivation**  
 Outcome: **Mortality**  
 Predictor: **IL8 ( ng / mL )**

|                           | Patients<br>(N) | Events<br>(n) | Events<br>(%) | HR    | HR<br>95% LCL | HR<br>95% UCL | Wald<br>pvalue | Median<br>(yrs.) | Median<br>95% LCL | Median<br>95% UCL | LR<br>pvalue | Logrank<br>pvalue | DevLIN<br>pvalue |
|---------------------------|-----------------|---------------|---------------|-------|---------------|---------------|----------------|------------------|-------------------|-------------------|--------------|-------------------|------------------|
| <b>Quintiles</b>          |                 |               |               |       |               |               |                |                  |                   |                   |              |                   |                  |
| < 0.0051                  | 26              | 9             | 34.62         | ----  | ----          | ----          | ----           | 4.02             | 2.431             |                   | 1.82e-02     | 1.03e-02          | 1.52e-03         |
| [ 0.0051,0.00776)         | 30              | 13            | 43.33         | 3.281 | 1.450         | 7.424         | 4.351e-03      | 4.62             | 2.034             |                   |              |                   |                  |
| [ 0.00776,0.00968)        | 28              | 17            | 60.71         | 1.053 | 4.479e-01     | 2.477         | 9.053e-01      | 2.61             | 9.062e-01         |                   |              |                   |                  |
| [ 0.00968,0.013)          | 27              | 17            | 62.96         | 1.698 | 7.537e-01     | 3.826         | 2.014e-01      | 2.66             | 9.309e-01         |                   |              |                   |                  |
| ≥ 0.013                   | 29              | 17            | 58.62         | 1.803 | 7.995e-01     | 4.066         | 1.554e-01      | 1.60             | 6.626e-01         | 2.853             |              |                   |                  |
| <b>Quartiles</b>          |                 |               |               |       |               |               |                |                  |                   |                   |              |                   |                  |
| < 0.0056                  | 34              | 12            | 35.29         | ----  | ----          | ----          | ----           | 4.02             | 3.751             |                   | 1.08e-02     | 8.67e-03          | 2.78e-03         |
| [ 0.0056,0.0087)          | 33              | 17            | 51.52         | 2.908 | 1.465         | 5.773         | 2.273e-03      | 4.08             | 1.144             |                   |              |                   |                  |
| [ 0.0087,0.011)           | 29              | 17            | 58.62         | 1.412 | 6.732e-01     | 2.963         | 3.611e-01      | 2.34             | 1.714             |                   |              |                   |                  |
| ≥ 0.011                   | 44              | 27            | 61.36         | 1.900 | 9.066e-01     | 3.984         | 8.906e-02      | 1.60             | 8.350e-01         | 2.850             |              |                   |                  |
| <b>Tertiles</b>           |                 |               |               |       |               |               |                |                  |                   |                   |              |                   |                  |
| < 0.0066                  | 43              | 17            | 39.53         | ----  | ----          | ----          | ----           | 4.02             | 3.261             |                   | 1.82e-02     | 1.52e-02          | 7.92e-03         |
| [ 0.0066,0.00997)         | 50              | 27            | 54.00         | 1.414 | 7.697e-01     | 2.598         | 2.642e-01      | 2.93             | 2.130             | 5.522             |              |                   |                  |
| ≥ 0.00997                 | 47              | 29            | 61.70         | 2.325 | 1.271         | 4.250         | 6.142e-03      | 1.70             | 8.378e-01         | 2.850             |              |                   |                  |
| <b>Profile Likelihood</b> |                 |               |               |       |               |               |                |                  |                   |                   |              |                   |                  |
| < 0.0072                  | 52              | 19            | 36.54         | ----  | ----          | ----          | ----           | 4.02             | 3.751             |                   | 2.17e-03     | 2.88e-03          | 1.44e-03         |
| ≥ 0.0072                  | 88              | 54            | 61.36         | 2.184 | 1.291         | 3.697         | 3.603e-03      | 2.13             | 1.087             | 2.853             |              |                   |                  |
| <b>Quantitative*</b>      |                 |               |               |       |               |               |                |                  |                   |                   |              |                   |                  |
|                           | 140             | 73            | 52.14         | 1.002 | 0.9844        | 1.019         | 8.498e-01      |                  |                   |                   | 8.528e-01    | 8.497e-01         |                  |

\*Units of pg / mL were used in **Quantitative model only**.

Cohort: Derivation  
 Outcome: Mortality  
 Predictor: VCAM1 ( ng / mL )

|                           | Patients<br>(N) | Events<br>(n) | Events<br>(%) | HR    | HR<br>95% LCL | HR<br>95% UCL | Wald<br>pvalue | Median<br>(yrs.) | Median<br>95% LCL | Median<br>95% UCL | LR<br>pvalue | Logrank<br>pvalue | DevLIN<br>pvalue |
|---------------------------|-----------------|---------------|---------------|-------|---------------|---------------|----------------|------------------|-------------------|-------------------|--------------|-------------------|------------------|
| <b>Quintiles</b>          |                 |               |               |       |               |               |                |                  |                   |                   |              |                   |                  |
| < 335                     | 27              | 7             | 25.93         | ----  | ----          | ----          | ----           | 4.60             | 2.431             |                   | 2.87e-02     | 2.66e-02          | 6.94e-01         |
| [ 335,402)                | 28              | 14            | 50.00         | 1.448 | 5.821e-01     | 3.601         | 4.260e-01      | 4.04             | 2.341             |                   |              |                   |                  |
| [ 402,457)                | 29              | 15            | 51.72         | 1.993 | 8.103e-01     | 4.900         | 1.331e-01      | 4.02             | 7.502e-01         |                   |              |                   |                  |
| [ 457,572)                | 28              | 16            | 57.14         | 2.344 | 9.601e-01     | 5.724         | 6.139e-02      | 1.71             | 8.241e-01         |                   |              |                   |                  |
| ≥ 572                     | 28              | 21            | 75.00         | 3.327 | 1.412         | 7.841         | 5.997e-03      | 2.13             | 8.378e-01         | 3.031             |              |                   |                  |
| <b>Quartiles</b>          |                 |               |               |       |               |               |                |                  |                   |                   |              |                   |                  |
| < 359                     | 35              | 11            | 31.43         | ----  | ----          | ----          | ----           | 4.60             | 2.664             |                   | 3.74e-03     | 3.59e-03          | 1.84e-01         |
| [ 359,419)                | 33              | 16            | 48.48         | 1.275 | 5.907e-01     | 2.750         | 5.362e-01      | 4.08             | 2.341             |                   |              |                   |                  |
| [ 419,518)                | 37              | 22            | 59.46         | 2.538 | 1.228         | 5.242         | 1.188e-02      | 1.60             | 7.502e-01         |                   |              |                   |                  |
| ≥ 518                     | 35              | 24            | 68.57         | 2.873 | 1.401         | 5.891         | 3.962e-03      | 2.13             | 8.350e-01         | 3.031             |              |                   |                  |
| <b>Tertiles</b>           |                 |               |               |       |               |               |                |                  |                   |                   |              |                   |                  |
| < 378                     | 47              | 16            | 34.04         | ----  | ----          | ----          | ----           | 4.15             | 2.431             |                   | 2.65e-02     | 3.13e-02          | 4.70e-01         |
| [ 378,480)                | 46              | 25            | 54.35         | 1.746 | 9.313e-01     | 3.275         | 8.219e-02      | 3.26             | 1.112             |                   |              |                   |                  |
| ≥ 480                     | 47              | 32            | 68.09         | 2.204 | 1.208         | 4.020         | 9.952e-03      | 2.13             | 9.500e-01         | 2.932             |              |                   |                  |
| <b>Profile Likelihood</b> |                 |               |               |       |               |               |                |                  |                   |                   |              |                   |                  |
| < 418.0                   | 68              | 27            | 39.71         | ----  | ----          | ----          | ----           | 4.08             | 2.664             |                   | 3.28e-04     | 3.01e-04          | 3.18e-02         |
| ≥ 418.0                   | 72              | 46            | 63.89         | 2.357 | 1.461         | 3.803         | 4.438e-04      | 1.71             | 8.378e-01         | 2.853             |              |                   |                  |
| <b>Quantitative</b>       | 140             | 73            | 52.14         | 1.002 | 1.001         | 1.003         | 9.835e-04      |                  |                   |                   | 2.684e-03    | 8.873e-04         |                  |

Cohort: Derivation  
 Outcome: Mortality  
 Predictor: S100A12 ( ng / mL )

|                           | Patients<br>(N) | Events<br>(n) | Events<br>(%) | HR    | HR<br>95% LCL | HR<br>95% UCL | Wald<br>pvalue | Median<br>(yrs.) | Median<br>95% LCL | Median<br>95% UCL | LR<br>pvalue | Logrank<br>pvalue | DevLIN<br>pvalue |
|---------------------------|-----------------|---------------|---------------|-------|---------------|---------------|----------------|------------------|-------------------|-------------------|--------------|-------------------|------------------|
| <b>Quintiles</b>          |                 |               |               |       |               |               |                |                  |                   |                   |              |                   |                  |
| < 15                      | 27              | 10            | 37.04         | ----  | ----          | ----          | ----           | 4.15             | 4.085             |                   | 1.49e-02     | 1.30e-02          | 5.59e-02         |
| [ 15,21.6)                | 29              | 15            | 51.72         | 1.892 | 8.442e-01     | 4.242         | 1.214e-01      | 2.13             | 1.112             |                   |              |                   |                  |
| [ 21.6,29)                | 27              | 12            | 44.44         | 1.386 | 5.963e-01     | 3.221         | 4.482e-01      | 4.04             | 2.431             |                   |              |                   |                  |
| [ 29,51)                  | 28              | 16            | 57.14         | 3.363 | 1.501         | 7.539         | 3.225e-03      | 0.79             | 6.626e-01         |                   |              |                   |                  |
| ≥ 51                      | 29              | 20            | 68.97         | 2.609 | 1.215         | 5.601         | 1.387e-02      | 2.61             | 8.378e-01         | 4.022             |              |                   |                  |
| <b>Quartiles</b>          |                 |               |               |       |               |               |                |                  |                   |                   |              |                   |                  |
| < 17.8                    | 35              | 14            | 40.00         | ----  | ----          | ----          | ----           | 4.15             | 2.341             |                   | 2.63e-02     | 2.95e-02          | 1.08e-01         |
| [ 17.8,25)                | 34              | 16            | 47.06         | 1.575 | 7.611e-01     | 3.258         | 2.210e-01      | 3.03             | 2.075             |                   |              |                   |                  |
| [ 25,45.2)                | 36              | 20            | 55.56         | 2.224 | 1.113         | 4.444         | 2.364e-02      | 1.14             | 7.502e-01         |                   |              |                   |                  |
| ≥ 45.2                    | 35              | 23            | 65.71         | 2.530 | 1.298         | 4.931         | 6.428e-03      | 2.13             | 8.378e-01         | 4.022             |              |                   |                  |
| <b>Tertiles</b>           |                 |               |               |       |               |               |                |                  |                   |                   |              |                   |                  |
| < 19                      | 40              | 16            | 40.00         | ----  | ----          | ----          | ----           | 4.15             | 2.130             |                   | 1.25e-02     | 1.22e-02          | 6.10e-02         |
| [ 19,37)                  | 52              | 27            | 51.92         | 1.620 | 8.664e-01     | 3.028         | 1.309e-01      | 3.03             | 2.075             |                   |              |                   |                  |
| ≥ 37                      | 48              | 30            | 62.50         | 2.447 | 1.329         | 4.504         | 4.048e-03      | 1.40             | 7.940e-01         | 2.932             |              |                   |                  |
| <b>Profile Likelihood</b> |                 |               |               |       |               |               |                |                  |                   |                   |              |                   |                  |
| < 26.5                    | 77              | 34            | 44.16         | ----  | ----          | ----          | ----           | 4.04             | 2.341             |                   | 1.65e-03     | 1.27e-03          | 9.44e-03         |
| ≥ 26.5                    | 63              | 39            | 61.90         | 2.107 | 1.326         | 3.347         | 1.599e-03      | 1.40             | 8.077e-01         | 2.932             |              |                   |                  |
| <b>Quantitative</b>       | 140             | 73            | 52.14         | 1.004 | 1.000         | 1.009         | 4.422e-02      |                  |                   |                   | 7.491e-02    | 4.214e-02         |                  |

**Cohort: Derivation**  
**Outcome: Transplant Free Survival**  
**Predictor: Age (years)**

|                           | Patients<br>(N) | Events<br>(n) | Events<br>(%) | HR        | HR<br>95% LCL | HR<br>95% UCL | Wald<br>pvalue | Median<br>(yrs.) | Median<br>95% LCL | Median<br>95% UCL | LR<br>pvalue | Logrank<br>pvalue | DevLIN<br>pvalue |
|---------------------------|-----------------|---------------|---------------|-----------|---------------|---------------|----------------|------------------|-------------------|-------------------|--------------|-------------------|------------------|
| <b>Quintiles</b>          |                 |               |               |           |               |               |                |                  |                   |                   |              |                   |                  |
| < 59.5                    | 28              | 18            | 64.29         | ----      | ----          | ----          | ----           | 2.41             | 6.188e-01         |                   | 4.19e-01     | 3.99e-01          | 1.25e-01         |
| [ 59.5,66.1)              | 28              | 21            | 75.00         | 1.669     | 8.859e-01     | 3.145         | 1.130e-01      | 0.84             | 4.079e-01         | 2.127             |              |                   |                  |
| [ 66.1,69.7)              | 28              | 20            | 71.43         | 9.955e-01 | 5.260e-01     | 1.884         | 9.889e-01      | 2.35             | 1.112             |                   |              |                   |                  |
| [ 69.7,73.9)              | 28              | 20            | 71.43         | 1.175     | 6.163e-01     | 2.241         | 6.237e-01      | 1.71             | 8.350e-01         |                   |              |                   |                  |
| ≥ 73.9                    | 28              | 24            | 85.71         | 1.402     | 7.568e-01     | 2.597         | 2.828e-01      | 2.13             | 8.077e-01         | 3.031             |              |                   |                  |
| <b>Quartiles</b>          |                 |               |               |           |               |               |                |                  |                   |                   |              |                   |                  |
| < 61.2                    | 35              | 22            | 62.86         | ----      | ----          | ----          | ----           | 1.67             | 6.188e-01         |                   | 4.09e-01     | 4.11e-01          | 1.58e-01         |
| [ 61.2,68.5)              | 35              | 28            | 80.00         | 1.325     | 7.574e-01     | 2.319         | 3.239e-01      | 1.11             | 7.064e-01         | 2.932             |              |                   |                  |
| [ 68.5,73.3)              | 35              | 25            | 71.43         | 9.073e-01 | 5.108e-01     | 1.612         | 7.400e-01      | 2.43             | 1.703             | 5.522             |              |                   |                  |
| ≥ 73.3                    | 35              | 28            | 80.00         | 1.315     | 7.490e-01     | 2.310         | 3.400e-01      | 1.60             | 7.940e-01         | 2.853             |              |                   |                  |
| <b>Tertiles</b>           |                 |               |               |           |               |               |                |                  |                   |                   |              |                   |                  |
| < 64.7                    | 47              | 31            | 65.96         | ----      | ----          | ----          | ----           | 1.67             | 7.502e-01         | 5.552             | 7.52e-01     | 7.50e-01          | 2.20e-01         |
| [ 64.7,71.3)              | 46              | 35            | 76.09         | 1.068     | 6.576e-01     | 1.735         | 7.901e-01      | 2.34             | 9.500e-01         | 3.003             |              |                   |                  |
| ≥ 71.3                    | 47              | 37            | 78.72         | 1.201     | 7.396e-01     | 1.950         | 4.591e-01      | 1.70             | 8.241e-01         | 2.853             |              |                   |                  |
| <b>Profile Likelihood</b> |                 |               |               |           |               |               |                |                  |                   |                   |              |                   |                  |
| <73.7                     | 109             | 76            | 69.72         | ----      | ----          | ----          | ----           | 1.95             | 9.500e-01         | 2.850             | 2.17e-01     | 2.05e-01          | 1.04e-01         |
| ≥73.7                     | 31              | 27            | 87.10         | 1.331     | 8.540e-01     | 2.073         | 2.067e-01      | 1.60             | 7.392e-01         | 2.853             |              |                   |                  |
| <b>Quantitative</b>       |                 |               |               |           |               |               |                |                  |                   |                   |              |                   |                  |
|                           | 140             | 103           | 73.57         | 1.001     | 9.749e-01     | 1.028         | 9.386e-01      |                  |                   |                   | 9.386e-01    | 9.386e-01         |                  |
| <b>Predictor: Gender</b>  |                 |               |               |           |               |               |                |                  |                   |                   |              |                   |                  |
| Female                    | 39              | 22            | 56.41         | ----      | ----          | ----          | ----           | 2.95             | 2.127             |                   |              |                   |                  |
| Male                      | 101             | 81            | 80.20         | 1.94      | 1.206         | 3.131         | 6.36E-03       | 1.14             | 0.808             | 2.13              | 3.88E-03     | 5.48E-03          |                  |

**Cohort: Derivation**  
**Outcome: Transplant Free Survival**  
**Predictor: Baseline (4-month) FVC % Predicted**

|                           | Patients<br>(N) | Events<br>(n) | Events<br>(%) | HR        | HR<br>95% LCL | HR<br>95% UCL | Wald<br>pvalue | Median<br>(yrs.) | Median<br>95% LCL | Median<br>95% UCL | LR<br>pvalue | Logrank<br>pvalue | DevLIN<br>pvalue |
|---------------------------|-----------------|---------------|---------------|-----------|---------------|---------------|----------------|------------------|-------------------|-------------------|--------------|-------------------|------------------|
| <b>Quintiles</b>          |                 |               |               |           |               |               |                |                  |                   |                   |              |                   |                  |
| < 43.3                    | 24              | 23            | 95.83         | ----      | ----          | ----          | ----           | 0.50             | 1.533e-01         | 1.703             | 1.24e-06     | 1.53e-07          | 1.22e-01         |
| [ 43.3,56.6)              | 24              | 20            | 83.33         | 3.508e-01 | 1.827e-01     | 6.734e-01     | 1.642e-03      | 1.32             | 5.832e-01         | 3.261             |              |                   |                  |
| [ 56.6,66)                | 24              | 15            | 62.50         | 3.122e-01 | 1.604e-01     | 6.079e-01     | 6.166e-04      | 2.09             | 8.405e-01         |                   |              |                   |                  |
| [ 66,77)                  | 24              | 18            | 75.00         | 3.999e-01 | 2.130e-01     | 7.509e-01     | 4.353e-03      | 1.95             | 1.396             | 3.031             |              |                   |                  |
| ≥ 77                      | 25              | 13            | 52.00         | 1.286e-01 | 6.190e-02     | 2.671e-01     | 3.812e-08      | 4.15             | 4.022             |                   |              |                   |                  |
| <b>Quartiles</b>          |                 |               |               |           |               |               |                |                  |                   |                   |              |                   |                  |
| < 47.8                    | 30              | 29            | 96.67         | ----      | ----          | ----          | ----           | 0.54             | 2.300e-01         | 1.703             | 2.78e-06     | 5.55e-07          | 2.89e-01         |
| [ 47.8,61.1)              | 30              | 22            | 73.33         | 4.094e-01 | 2.307e-01     | 7.263e-01     | 2.265e-03      | 1.90             | 7.392e-01         | 3.261             |              |                   |                  |
| [ 61.1,74)                | 29              | 21            | 72.41         | 4.597e-01 | 2.587e-01     | 8.170e-01     | 8.075e-03      | 2.03             | 9.062e-01         | 3.751             |              |                   |                  |
| ≥ 74                      | 32              | 17            | 53.12         | 1.929e-01 | 1.039e-01     | 3.582e-01     | 1.865e-07      | 4.04             | 2.971             |                   |              |                   |                  |
| <b>Tertiles</b>           |                 |               |               |           |               |               |                |                  |                   |                   |              |                   |                  |
| < 52.8                    | 40              | 36            | 90.00         | ----      | ----          | ----          | ----           | 0.58             | 3.313e-01         | 1.714             | 5.19e-05     | 4.42e-05          | 7.68e-01         |
| [ 52.8,69.9)              | 41              | 30            | 73.17         | 6.461e-01 | 3.910e-01     | 1.068         | 8.829e-02      | 1.60             | 8.405e-01         | 2.853             |              |                   |                  |
| ≥ 69.9                    | 40              | 23            | 57.50         | 3.072e-01 | 1.795e-01     | 5.259e-01     | 1.687e-05      | 4.02             | 2.949             |                   |              |                   |                  |
| <b>Profile Likelihood</b> |                 |               |               |           |               |               |                |                  |                   |                   |              |                   |                  |
| < 45.0                    | 26              | 25            | 96.15         | ----      | ----          | ----          | ----           | 0.36             | 1.533e-01         | 1.703             | 1.09e-06     | 1.33e-08          | 4.66e-02         |
| ≥ 45.0                    | 95              | 64            | 67.37         | 2.603e-01 | 1.583e-01     | 4.283e-01     | 1.162e-07      | 2.43             | 1.673             | 3.261             |              |                   |                  |
| <b>Quantitative</b>       |                 |               |               |           |               |               |                |                  |                   |                   |              |                   |                  |
|                           | 121             | 89            | 73.55         | 9.695e-01 | 9.577e-01     | 9.815e-01     | 7.600e-07      |                  |                   |                   | 2.664e-07    | 6.155e-07         |                  |

**Cohort: Derivation**  
**Outcome: Transplant Free Survival**  
**Predictor: Baseline (4-month) DLco % Predicted**

|                           | Patients<br>(N) | Events<br>(n) | Events<br>(%) | HR        | HR<br>95% LCL | HR<br>95% UCL | Wald<br>pvalue | Median<br>(yrs.) | Median<br>95% LCL | Median<br>95% UCL | LR<br>pvalue | Logrank<br>pvalue | DevLIN<br>pvalue |
|---------------------------|-----------------|---------------|---------------|-----------|---------------|---------------|----------------|------------------|-------------------|-------------------|--------------|-------------------|------------------|
| <b>Quintiles</b>          |                 |               |               |           |               |               |                |                  |                   |                   |              |                   |                  |
| < 28.9                    | 22              | 19            | 86.36         | ----      | ----          | ----          | ----           | 0.58             | 1.697e-01         | 2.127             | 6.03e-06     | 2.45e-06          | 6.32e-01         |
| [ 28.9,39)                | 22              | 19            | 86.36         | 5.025e-01 | 2.538e-01     | 9.952e-01     | 4.840e-02      | 1.09             | 3.313e-01         | 2.932             |              |                   |                  |
| [ 39,49.4)                | 21              | 16            | 76.19         | 4.330e-01 | 2.209e-01     | 8.490e-01     | 1.483e-02      | 2.03             | 1.295             | 3.034             |              |                   |                  |
| [ 49.4,60)                | 22              | 14            | 63.64         | 3.151e-01 | 1.563e-01     | 6.356e-01     | 1.254e-03      | 2.85             | 1.947             |                   |              |                   |                  |
| ≥ 60                      | 22              | 9             | 40.91         | 1.254e-01 | 5.480e-02     | 2.871e-01     | 8.960e-07      | 4.62             | 4.153             |                   |              |                   |                  |
| <b>Quartiles</b>          |                 |               |               |           |               |               |                |                  |                   |                   |              |                   |                  |
| < 31.6                    | 27              | 24            | 88.89         | ----      | ----          | ----          | ----           | 0.91             | 5.777e-01         | 2.127             | 9.36e-06     | 7.96e-06          | 7.90e-01         |
| [ 31.6,43.8)              | 27              | 23            | 85.19         | 7.944e-01 | 4.413e-01     | 1.430         | 4.429e-01      | 0.84             | 5.010e-01         | 2.092             |              |                   |                  |
| [ 43.8,57)                | 26              | 18            | 69.23         | 4.267e-01 | 2.293e-01     | 7.938e-01     | 7.163e-03      | 2.85             | 2.130             |                   |              |                   |                  |
| ≥ 57                      | 29              | 12            | 41.38         | 2.047e-01 | 1.012e-01     | 4.141e-01     | 1.019e-05      | 4.62             | 4.153             |                   |              |                   |                  |
| <b>Tertiles</b>           |                 |               |               |           |               |               |                |                  |                   |                   |              |                   |                  |
| < 36.6                    | 36              | 32            | 88.89         | ----      | ----          | ----          | ----           | 0.58             | 2.546e-01         | 1.714             | 1.02e-06     | 1.47e-07          | 4.86e-01         |
| [ 36.6,53.4)              | 37              | 28            | 75.68         | 4.105e-01 | 2.435e-01     | 6.919e-01     | 8.289e-04      | 2.09             | 1.673             | 3.034             |              |                   |                  |
| ≥ 53.4                    | 36              | 17            | 47.22         | 2.092e-01 | 1.144e-01     | 3.826e-01     | 3.793e-07      | 4.15             | 3.261             |                   |              |                   |                  |
| <b>Profile Likelihood</b> |                 |               |               |           |               |               |                |                  |                   |                   |              |                   |                  |
| <38.0                     | 40              | 35            | 87.50         | ----      | ----          | ----          | ----           | 0.58             | 2.930e-01         | 1.396             | 2.18e-07     | 1.06e-08          | 8.42e-02         |
| ≥38.0                     | 69              | 42            | 60.87         | 2.771e-01 | 1.737e-01     | 4.423e-01     | 7.382e-08      | 3.00             | 2.341             | 4.153             |              |                   |                  |
| <b>Quantitative</b>       | 109             | 77            | 70.64         | 9.618e-01 | 9.475e-01     | 9.763e-01     | 3.559e-07      |                  |                   |                   | 1.944e-07    | 1.965e-07         |                  |

**Cohort: Derivation**  
**Outcome: Transplant Free Survival**  
**Predictor: Baseline (4-month) CPI**

|                           | Patients<br>(N) | Events<br>(n) | Events<br>(%) | HR    | HR<br>95% LCL | HR<br>95% UCL | Wald<br>pvalue | Median<br>(yrs.) | Median<br>95% LCL | Median<br>95% UCL | LR<br>pvalue | Logrank<br>pvalue | DevLIN<br>pvalue |
|---------------------------|-----------------|---------------|---------------|-------|---------------|---------------|----------------|------------------|-------------------|-------------------|--------------|-------------------|------------------|
| <b>Quintiles</b>          |                 |               |               |       |               |               |                |                  |                   |                   |              |                   |                  |
| < 43                      | 22              | 8             | 36.36         | ----  | ----          | ----          | ----           | 5.20             | 4.616             |                   | 4.39e-08     | 1.05e-08          | 1.25e-01         |
| [ 43,50.8)                | 22              | 13            | 59.09         | 2.447 | 1.001         | 5.984         | 4.983e-02      | 3.26             | 2.034             |                   |              |                   |                  |
| [ 50.8,58.7)              | 21              | 17            | 80.95         | 3.039 | 1.294         | 7.136         | 1.074e-02      | 2.34             | 1.295             |                   |              |                   |                  |
| [ 58.7,64.5)              | 22              | 20            | 90.91         | 8.813 | 3.719         | 2.088e+01     | 7.637e-07      | 0.93             | 5.010e-01         | 1.900             |              |                   |                  |
| ≥ 64.5                    | 22              | 19            | 86.36         | 7.894 | 3.385         | 1.841e+01     | 1.725e-06      | 0.58             | 1.697e-01         | 2.853             |              |                   |                  |
| <b>Quartiles</b>          |                 |               |               |       |               |               |                |                  |                   |                   |              |                   |                  |
| < 44.4                    | 27              | 9             | 33.33         | ----  | ----          | ----          | ----           | 4.62             | 4.616             |                   | 5.77e-08     | 9.87e-09          | 3.24e-01         |
| [ 44.4,56)                | 27              | 20            | 74.07         | 2.901 | 1.310         | 6.427         | 8.674e-03      | 2.85             | 1.947             |                   |              |                   |                  |
| [ 56,62.7)                | 27              | 23            | 85.19         | 3.904 | 1.784         | 8.542         | 6.506e-04      | 1.70             | 1.295             | 2.606             |              |                   |                  |
| ≥ 62.7                    | 28              | 25            | 89.29         | 8.847 | 4.055         | 1.930e+01     | 4.315e-08      | 0.33             | 1.478e-01         | 1.714             |              |                   |                  |
| <b>Tertiles</b>           |                 |               |               |       |               |               |                |                  |                   |                   |              |                   |                  |
| < 47.7                    | 36              | 15            | 41.67         | ----  | ----          | ----          | ----           | 4.15             | 4.044             |                   | 1.07e-08     | 9.58e-10          | 1.25e-01         |
| [ 47.7,59.8)              | 37              | 29            | 78.38         | 2.434 | 1.292         | 4.585         | 5.903e-03      | 2.34             | 1.703             | 3.034             |              |                   |                  |
| ≥ 59.8                    | 36              | 33            | 91.67         | 6.475 | 3.429         | 1.223e+01     | 8.496e-09      | 0.58             | 2.546e-01         | 1.320             |              |                   |                  |
| <b>Profile Likelihood</b> |                 |               |               |       |               |               |                |                  |                   |                   |              |                   |                  |
| <58.9                     | 66              | 38            | 57.58         | ----  | ----          | ----          | ----           | 3.75             | 2.434             | 4.616             | 1.25e-08     | 5.81e-10          | 4.20e-02         |
| ≥58.9                     | 43              | 39            | 90.70         | 4.106 | 2.544         | 6.628         | 7.361e-09      | 0.74             | 4.079e-01         | 1.703             |              |                   |                  |
| <b>Quantitative</b>       | 109             | 77            | 70.64         | 1.060 | 1.039         | 1.082         | 2.445e-08      |                  |                   |                   | 8.193e-09    | 1.591e-08         |                  |



**Cohort: Derivation**  
**Outcome: Transplant Free Survival**  
**Predictor: Baseline (3-month) FVC % Predicted**

|                           | Patients<br>(N) | Events<br>(n) | Events<br>(%) | HR        | HR<br>95% LCL | HR<br>95% UCL | Wald<br>pvalue | Median<br>(yrs.) | Median<br>95% LCL | Median<br>95% UCL | LR<br>pvalue | Logrank<br>pvalue | DevLIN<br>pvalue |
|---------------------------|-----------------|---------------|---------------|-----------|---------------|---------------|----------------|------------------|-------------------|-------------------|--------------|-------------------|------------------|
| <b>Quintiles</b>          |                 |               |               |           |               |               |                |                  |                   |                   |              |                   |                  |
| < 43.1                    | 22              | 21            | 95.45         | ----      | ----          | ----          | ----           | 0.28             | 1.478e-01         | 1.714             | 7.42e-06     | 1.03e-06          | 2.51e-01         |
| [ 43.1,56.5)              | 21              | 17            | 80.95         | 3.582e-01 | 1.774e-01     | 7.235e-01     | 4.203e-03      | 0.70             | 4.873e-01         |                   |              |                   |                  |
| [ 56.5,65.7)              | 22              | 14            | 63.64         | 3.079e-01 | 1.540e-01     | 6.157e-01     | 8.641e-04      | 2.09             | 8.405e-01         |                   |              |                   |                  |
| [ 65.7,76.7)              | 21              | 15            | 71.43         | 3.834e-01 | 1.947e-01     | 7.552e-01     | 5.571e-03      | 2.08             | 1.596             |                   |              |                   |                  |
| ≥ 76.7                    | 22              | 11            | 50.00         | 1.293e-01 | 5.922e-02     | 2.821e-01     | 2.786e-07      | 4.15             | 4.022             |                   |              |                   |                  |
| <b>Quartiles</b>          |                 |               |               |           |               |               |                |                  |                   |                   |              |                   |                  |
| < 47.8                    | 27              | 26            | 96.30         | ----      | ----          | ----          | ----           | 0.36             | 1.697e-01         | 1.703             | 3.78e-06     | 8.70e-07          | 2.37e-01         |
| [ 47.8,60.5)              | 27              | 19            | 70.37         | 3.863e-01 | 2.087e-01     | 7.149e-01     | 2.459e-03      | 1.90             | 7.009e-01         |                   |              |                   |                  |
| [ 60.5,73.4)              | 27              | 20            | 74.07         | 4.490e-01 | 2.468e-01     | 8.170e-01     | 8.747e-03      | 2.03             | 8.077e-01         | 3.751             |              |                   |                  |
| ≥ 73.4                    | 27              | 13            | 48.15         | 1.695e-01 | 8.524e-02     | 3.372e-01     | 4.210e-07      | 4.15             | 2.971             |                   |              |                   |                  |
| <b>Tertiles</b>           |                 |               |               |           |               |               |                |                  |                   |                   |              |                   |                  |
| < 52.4                    | 36              | 32            | 88.89         | ----      | ----          | ----          | ----           | 0.50             | 2.300e-01         | 1.703             | 1.48e-04     | 1.23e-04          | 6.78e-01         |
| [ 52.4,69.6)              | 36              | 26            | 72.22         | 6.310e-01 | 3.689e-01     | 1.080         | 9.282e-02      | 1.90             | 8.405e-01         | 3.034             |              |                   |                  |
| ≥ 69.6                    | 36              | 20            | 55.56         | 3.032e-01 | 1.709e-01     | 5.382e-01     | 4.566e-05      | 4.02             | 2.949             |                   |              |                   |                  |
| <b>Profile Likelihood</b> |                 |               |               |           |               |               |                |                  |                   |                   |              |                   |                  |
| < 45.2                    | 24              | 23            | 95.83         | ----      | ----          | ----          | ----           | 0.36             | 1.533e-01         | 1.703             | 2.85e-06     | 5.46e-08          | 7.22e-02         |
| ≥ 45.2                    | 84              | 55            | 65.48         | 2.571e-01 | 1.520e-01     | 4.349e-01     | 4.078e-07      | 2.85             | 1.900             | 3.880             |              |                   |                  |
| <b>Quantitative</b>       | 108             | 78            | 72.22         | 9.685e-01 | 9.559e-01     | 9.813e-01     | 1.731e-06      |                  |                   |                   | 6.459e-07    | 1.466e-06         |                  |

**Cohort: Derivation**  
**Outcome: Transplant Free Survival**  
**Predictor: Baseline (3-month) DLco % Predicted**

|                           | Patients<br>(N) | Events<br>(n) | Events<br>(%) | HR        | HR<br>95% LCL | HR<br>95% UCL | Wald<br>pvalue | Median<br>(yrs.) | Median<br>95% LCL | Median<br>95% UCL | LR<br>pvalue | Logrank<br>pvalue | DevLIN<br>pvalue |
|---------------------------|-----------------|---------------|---------------|-----------|---------------|---------------|----------------|------------------|-------------------|-------------------|--------------|-------------------|------------------|
| <b>Quintiles</b>          |                 |               |               |           |               |               |                |                  |                   |                   |              |                   |                  |
| < 28.6                    | 19              | 17            | 89.47         | ----      | ----          | ----          | ----           | 0.58             | 9.030e-02         | 2.127             | 2.37e-06     | 4.37e-07          | 1.50e-01         |
| [ 28.6,38)                | 18              | 15            | 83.33         | 7.304e-01 | 3.599e-01     | 1.483         | 3.845e-01      | 0.55             | 2.546e-01         | 3.031             |              |                   |                  |
| [ 38,49.9)                | 20              | 15            | 75.00         | 3.169e-01 | 1.528e-01     | 6.574e-01     | 2.025e-03      | 1.90             | 1.295             |                   |              |                   |                  |
| [ 49.9,61)                | 19              | 12            | 63.16         | 3.037e-01 | 1.435e-01     | 6.427e-01     | 1.835e-03      | 2.43             | 1.596             |                   |              |                   |                  |
| ≥ 61                      | 20              | 8             | 40.00         | 1.198e-01 | 4.999e-02     | 2.869e-01     | 1.926e-06      | 4.62             | 4.153             |                   |              |                   |                  |
| <b>Quartiles</b>          |                 |               |               |           |               |               |                |                  |                   |                   |              |                   |                  |
| < 31.4                    | 24              | 21            | 87.50         | ----      | ----          | ----          | ----           | 0.91             | 2.300e-01         | 2.853             | 1.86e-05     | 2.85e-05          | 6.41e-01         |
| [ 31.4,41.3)              | 24              | 20            | 83.33         | 8.027e-01 | 4.262e-01     | 1.512         | 4.964e-01      | 0.74             | 4.079e-01         | 2.092             |              |                   |                  |
| [ 41.3,57.2)              | 24              | 17            | 70.83         | 4.945e-01 | 2.584e-01     | 9.464e-01     | 3.347e-02      | 2.41             | 1.703             |                   |              |                   |                  |
| ≥ 57.2                    | 24              | 9             | 37.50         | 1.791e-01 | 8.110e-02     | 3.957e-01     | 2.106e-05      | 4.62             | 4.153             |                   |              |                   |                  |
| <b>Tertiles</b>           |                 |               |               |           |               |               |                |                  |                   |                   |              |                   |                  |
| < 34.5                    | 32              | 28            | 87.50         | ----      | ----          | ----          | ----           | 0.58             | 2.546e-01         | 2.075             | 2.34e-06     | 8.67e-07          | 5.87e-01         |
| [ 34.5,54.3)              | 32              | 25            | 78.12         | 4.798e-01 | 2.753e-01     | 8.363e-01     | 9.577e-03      | 1.95             | 1.295             | 2.949             |              |                   |                  |
| ≥ 54.3                    | 32              | 14            | 43.75         | 1.949e-01 | 1.011e-01     | 3.760e-01     | 1.068e-06      | 4.15             | 3.880             |                   |              |                   |                  |
| <b>Profile Likelihood</b> |                 |               |               |           |               |               |                |                  |                   |                   |              |                   |                  |
| <38.0                     | 37              | 32            | 86.49         | ----      | ----          | ----          | ----           | 0.55             | 2.300e-01         | 2.075             | 6.69e-07     | 5.02e-08          | 1.22e-01         |
| ≥38.0                     | 59              | 35            | 59.32         | 2.702e-01 | 1.637e-01     | 4.460e-01     | 3.103e-07      | 3.26             | 2.130             | 5.522             |              |                   |                  |
| <b>Quantitative</b>       | 96              | 67            | 69.79         | 9.610e-01 | 9.458e-01     | 9.764e-01     | 9.150e-07      |                  |                   |                   | 4.407e-07    | 4.316e-07         |                  |

**Cohort: Derivation**  
**Outcome: Transplant Free Survival**  
**Predictor: Baseline (3-month) CPI**

|                           | Patients<br>(N) | Events<br>(n) | Events<br>(%) | HR    | HR<br>95% LCL | HR<br>95% UCL | Wald<br>pvalue | Median<br>(yrs.) | Median<br>95% LCL | Median<br>95% UCL | LR<br>pvalue | Logrank<br>pvalue | DevLIN<br>pvalue |
|---------------------------|-----------------|---------------|---------------|-------|---------------|---------------|----------------|------------------|-------------------|-------------------|--------------|-------------------|------------------|
| <b>Quintiles</b>          |                 |               |               |       |               |               |                |                  |                   |                   |              |                   |                  |
| < 42.8                    | 19              | 7             | 36.84         | ----  | ----          | ----          | ----           | 5.20             | 4.616             |                   | 2.71e-07     | 5.04e-08          | 1.14e-01         |
| [ 42.8,51.5)              | 19              | 11            | 57.89         | 2.371 | 9.023e-01     | 6.230         | 7.986e-02      | 3.26             | 1.947             |                   |              |                   |                  |
| [ 51.5,59)                | 19              | 14            | 73.68         | 2.679 | 1.064         | 6.744         | 3.649e-02      | 2.41             | 1.295             |                   |              |                   |                  |
| [ 59,65.1)                | 19              | 18            | 94.74         | 9.353 | 3.711         | 2.357e+01     | 2.134e-06      | 0.69             | 4.079e-01         | 1.900             |              |                   |                  |
| ≥ 65.1                    | 20              | 17            | 85.00         | 7.563 | 3.058         | 1.871e+01     | 1.191e-05      | 0.33             | 8.760e-02         | 2.932             |              |                   |                  |
| <b>Quartiles</b>          |                 |               |               |       |               |               |                |                  |                   |                   |              |                   |                  |
| < 44.3                    | 24              | 8             | 33.33         | ----  | ----          | ----          | ----           | 5.20             | 4.616             |                   | 6.47e-07     | 3.00e-07          | 7.11e-01         |
| [ 44.3,56.1)              | 24              | 17            | 70.83         | 3.051 | 1.303         | 7.143         | 1.018e-02      | 2.43             | 1.596             |                   |              |                   |                  |
| [ 56.1,62.8)              | 24              | 21            | 87.50         | 4.336 | 1.896         | 9.915         | 5.086e-04      | 1.29             | 8.405e-01         | 2.130             |              |                   |                  |
| ≥ 62.8                    | 24              | 21            | 87.50         | 8.512 | 3.701         | 1.958e+01     | 4.666e-07      | 0.28             | 1.396e-01         | 2.127             |              |                   |                  |
| <b>Tertiles</b>           |                 |               |               |       |               |               |                |                  |                   |                   |              |                   |                  |
| < 47.6                    | 32              | 13            | 40.62         | ----  | ----          | ----          | ----           | 4.62             | 4.153             |                   | 5.45e-08     | 4.65e-09          | 2.06e-01         |
| [ 47.6,59.9)              | 32              | 25            | 78.12         | 2.400 | 1.217         | 4.730         | 1.146e-02      | 2.13             | 1.703             | 3.751             |              |                   |                  |
| ≥ 59.9                    | 32              | 29            | 90.62         | 6.717 | 3.403         | 1.326e+01     | 4.051e-08      | 0.41             | 2.300e-01         | 1.320             |              |                   |                  |
| <b>Profile Likelihood</b> |                 |               |               |       |               |               |                |                  |                   |                   |              |                   |                  |
| <58.9                     | 57              | 32            | 56.14         | ----  | ----          | ----          | ----           | 3.75             | 2.949             | 5.522             | 3.43e-08     | 2.04e-09          | 5.09e-02         |
| ≥58.9                     | 39              | 35            | 89.74         | 4.347 | 2.592         | 7.292         | 2.572e-08      | 0.58             | 2.930e-01         | 1.703             |              |                   |                  |
| <b>Quantitative</b>       | 96              | 67            | 69.79         | 1.062 | 1.039         | 1.085         | 8.946e-08      |                  |                   |                   | 2.462e-08    | 4.772e-08         |                  |

**Cohort: Derivation**  
**Outcome: Transplant Free Survival**  
**Predictor: MMP7 ( ng / mL )**

|                           | Patients<br>(N) | Events<br>(n) | Events<br>(%) | HR        | HR<br>95% LCL | HR<br>95% UCL | Wald<br>pvalue | Median<br>(yrs.) | Median<br>95% LCL | Median<br>95% UCL | LR<br>pvalue | Logrank<br>pvalue | DevLIN<br>pvalue |
|---------------------------|-----------------|---------------|---------------|-----------|---------------|---------------|----------------|------------------|-------------------|-------------------|--------------|-------------------|------------------|
| <b>Quintiles</b>          |                 |               |               |           |               |               |                |                  |                   |                   |              |                   |                  |
| < 2.7                     | 27              | 18            | 66.67         | ----      | ----          | ----          | ----           | 1.70             | 1.144             |                   | 1.81e-01     | 1.42e-01          | 1.88e-01         |
| [ 2.7,3.76)               | 26              | 17            | 65.38         | 7.890e-01 | 4.056e-01     | 1.535         | 4.851e-01      | 2.97             | 1.714             |                   |              |                   |                  |
| [ 3.76,4.99)              | 27              | 20            | 74.07         | 1.009     | 5.305e-01     | 1.917         | 9.792e-01      | 1.11             | 6.188e-01         |                   |              |                   |                  |
| [ 4.99,6.41)              | 26              | 23            | 88.46         | 1.720     | 9.253e-01     | 3.196         | 8.645e-02      | 0.84             | 5.010e-01         | 2.853             |              |                   |                  |
| ≥ 6.41                    | 27              | 19            | 70.37         | 1.025     | 5.365e-01     | 1.958         | 9.403e-01      | 1.71             | 8.378e-01         |                   |              |                   |                  |
| <b>Quartiles</b>          |                 |               |               |           |               |               |                |                  |                   |                   |              |                   |                  |
| < 2.92                    | 33              | 22            | 66.67         | ----      | ----          | ----          | ----           | 2.43             | 1.673             |                   | 9.31e-02     | 7.69e-02          | 4.72e-02         |
| [ 2.92,4.3)               | 33              | 22            | 66.67         | 1.041     | 5.757e-01     | 1.882         | 8.946e-01      | 2.41             | 8.597e-01         |                   |              |                   |                  |
| [ 4.3,5.73)               | 33              | 27            | 81.82         | 1.928     | 1.091         | 3.409         | 2.385e-02      | 0.81             | 5.284e-01         | 2.300             |              |                   |                  |
| ≥ 5.73                    | 34              | 26            | 76.47         | 1.375     | 7.780e-01     | 2.432         | 2.728e-01      | 1.60             | 8.405e-01         | 2.949             |              |                   |                  |
| <b>Tertiles</b>           |                 |               |               |           |               |               |                |                  |                   |                   |              |                   |                  |
| < 3.51                    | 44              | 30            | 68.18         | ----      | ----          | ----          | ----           | 2.43             | 1.673             | 4.616             | 3.13e-01     | 3.23e-01          | 2.31e-01         |
| [ 3.51,5.35)              | 45              | 33            | 73.33         | 1.381     | 8.413e-01     | 2.267         | 2.017e-01      | 0.91             | 6.160e-01         | 2.853             |              |                   |                  |
| ≥ 5.35                    | 44              | 34            | 77.27         | 1.398     | 8.543e-01     | 2.287         | 1.824e-01      | 1.60             | 8.405e-01         | 2.932             |              |                   |                  |
| <b>Profile Likelihood</b> |                 |               |               |           |               |               |                |                  |                   |                   |              |                   |                  |
| < 4.2                     | 63              | 41            | 65.08         | ----      | ----          | ----          | ----           | 2.43             | 1.703             | 4.044             | 1.14e-02     | 1.11e-02          | 1.51e-03         |
| ≥ 4.2                     | 70              | 56            | 80.00         | 1.685     | 1.121         | 2.532         | 1.208e-02      | 1.09             | 8.241e-01         | 2.130             |              |                   |                  |
| <b>Quantitative</b>       | 133             | 97            | 72.93         | 1.015     | 0.9538        | 1.080         | 6.377e-01      |                  |                   |                   | 6.412e-01    | 6.376e-01         |                  |

**Cohort: Derivation**  
**Outcome: Transplant Free Survival**  
**Predictor: ICAM1 ( ng / mL )**

|                           | Patients<br>(N) | Events<br>(n) | Events<br>(%) | HR        | HR<br>95% LCL | HR<br>95% UCL | Wald<br>pvalue | Median<br>(yrs.) | Median<br>95% LCL | Median<br>95% UCL | LR<br>pvalue | Logrank<br>pvalue | DevLIN<br>pvalue |
|---------------------------|-----------------|---------------|---------------|-----------|---------------|---------------|----------------|------------------|-------------------|-------------------|--------------|-------------------|------------------|
| <b>Quintiles</b>          |                 |               |               |           |               |               |                |                  |                   |                   |              |                   |                  |
| < 158                     | 28              | 16            | 57.14         | ----      | ----          | ----          | ----           | 3.88             | 1.144             |                   | 7.36e-03     | 6.01e-03          | 9.57e-03         |
| [ 158,205)                | 28              | 16            | 57.14         | 8.857e-01 | 4.364e-01     | 1.798         | 7.368e-01      | 2.43             | 1.320             |                   |              |                   |                  |
| [ 205,252)                | 28              | 23            | 82.14         | 2.307     | 1.213         | 4.386         | 1.076e-02      | 0.81             | 5.832e-01         | 2.949             |              |                   |                  |
| [ 252,351)                | 28              | 23            | 82.14         | 2.180     | 1.145         | 4.149         | 1.767e-02      | 0.95             | 6.407e-01         | 2.606             |              |                   |                  |
| ≥ 351                     | 28              | 25            | 89.29         | 1.356     | 7.123e-01     | 2.582         | 3.536e-01      | 1.95             | 8.378e-01         | 4.085             |              |                   |                  |
| <b>Quartiles</b>          |                 |               |               |           |               |               |                |                  |                   |                   |              |                   |                  |
| < 175                     | 33              | 20            | 60.61         | ----      | ----          | ----          | ----           | 2.43             | 1.396             |                   | 1.67e-01     | 1.77e-01          | 2.20e-01         |
| [ 175,230)                | 37              | 25            | 67.57         | 1.446     | 7.983e-01     | 2.618         | 2.239e-01      | 0.93             | 7.392e-01         | 2.949             |              |                   |                  |
| [ 230,318)                | 35              | 26            | 74.29         | 1.913     | 1.064         | 3.441         | 3.021e-02      | 1.09             | 8.077e-01         | 2.971             |              |                   |                  |
| ≥ 318                     | 35              | 32            | 91.43         | 1.555     | 8.845e-01     | 2.735         | 1.251e-01      | 1.95             | 8.350e-01         | 2.932             |              |                   |                  |
| <b>Tertiles</b>           |                 |               |               |           |               |               |                |                  |                   |                   |              |                   |                  |
| < 197                     | 47              | 27            | 57.45         | ----      | ----          | ----          | ----           | 2.66             | 1.703             |                   | 1.17e-02     | 1.44e-02          | 8.61e-03         |
| [ 197,274)                | 46              | 35            | 76.09         | 2.014     | 1.216         | 3.337         | 6.536e-03      | 0.86             | 7.009e-01         | 2.606             |              |                   |                  |
| ≥ 274                     | 47              | 41            | 87.23         | 1.787     | 1.096         | 2.914         | 2.001e-02      | 1.71             | 8.378e-01         | 2.850             |              |                   |                  |
| <b>Profile Likelihood</b> |                 |               |               |           |               |               |                |                  |                   |                   |              |                   |                  |
| <202.5                    | 53              | 29            | 54.72         | ----      | ----          | ----          | ----           | 3.88             | 1.703             |                   | 2.13e-04     | 2.92e-04          | 2.13e-05         |
| ≥202.5                    | 87              | 74            | 85.06         | 2.182     | 1.416         | 3.362         | 4.039e-04      | 0.93             | 7.940e-01         | 2.092             |              |                   |                  |
| <b>Quantitative</b>       | 140             | 103           | 73.57         | 1.001     | 9.993e-01     | 1.002         | 3.745e-01      |                  |                   |                   | 3.836e-01    | 3.741e-01         |                  |

**Cohort: Derivation**  
**Outcome: Transplant Free Survival**  
**Predictor: IL8 ( ng / mL )**

|                           | Patients<br>(N) | Events<br>(n) | Events<br>(%) | HR        | HR<br>95% LCL | HR<br>95% UCL | Wald<br>pvalue | Median<br>(yrs.) | Median<br>95% LCL | Median<br>95% UCL | LR<br>pvalue | Logrank<br>pvalue | DevLIN<br>pvalue |
|---------------------------|-----------------|---------------|---------------|-----------|---------------|---------------|----------------|------------------|-------------------|-------------------|--------------|-------------------|------------------|
| <b>Quintiles</b>          |                 |               |               |           |               |               |                |                  |                   |                   |              |                   |                  |
| < 0.0051                  | 26              | 17            | 65.38         | ----      | ----          | ----          | ----           | 2.97             | 1.112             |                   | 1.78e-03     | 9.40e-04          | 2.91e-05         |
| [ 0.0051,0.00776)         | 30              | 15            | 50.00         | 2.471     | 1.316         | 4.641         | 4.881e-03      | 4.62             | 2.034             |                   |              |                   |                  |
| [ 0.00776,0.00968)        | 28              | 23            | 82.14         | 6.577e-01 | 3.272e-01     | 1.322         | 2.393e-01      | 1.29             | 7.064e-01         | 3.880             |              |                   |                  |
| [ 0.00968,0.013)          | 27              | 24            | 88.89         | 1.249     | 6.648e-01     | 2.347         | 4.893e-01      | 1.70             | 8.597e-01         | 2.949             |              |                   |                  |
| ≥ 0.013                   | 29              | 24            | 82.76         | 1.385     | 7.412e-01     | 2.589         | 3.070e-01      | 0.62             | 1.478e-01         | 2.092             |              |                   |                  |
| <b>Quartiles</b>          |                 |               |               |           |               |               |                |                  |                   |                   |              |                   |                  |
| < 0.0056                  | 34              | 22            | 64.71         | ----      | ----          | ----          | ----           | 2.97             | 1.396             |                   | 2.18e-03     | 1.90e-03          | 3.60e-04         |
| [ 0.0056,0.0087)          | 33              | 18            | 54.55         | 2.105     | 1.232         | 3.596         | 6.445e-03      | 4.08             | 1.144             |                   |              |                   |                  |
| [ 0.0087,0.011)           | 29              | 27            | 93.10         | 8.121e-01 | 4.350e-01     | 1.516         | 5.134e-01      | 1.32             | 6.160e-01         | 2.606             |              |                   |                  |
| ≥ 0.011                   | 44              | 36            | 81.82         | 1.659     | 9.437e-01     | 2.917         | 7.864e-02      | 0.84             | 5.530e-01         | 2.092             |              |                   |                  |
| <b>Tertiles</b>           |                 |               |               |           |               |               |                |                  |                   |                   |              |                   |                  |
| < 0.0066                  | 43              | 27            | 62.79         | ----      | ----          | ----          | ----           | 2.97             | 1.396             |                   | 1.79e-02     | 1.39e-02          | 5.62e-03         |
| [ 0.0066,0.00997)         | 50              | 37            | 74.00         | 1.227     | 7.459e-01     | 2.017         | 4.210e-01      | 2.13             | 9.062e-01         | 3.880             |              |                   |                  |
| ≥ 0.00997                 | 47              | 39            | 82.98         | 1.987     | 1.212         | 3.260         | 6.528e-03      | 0.93             | 6.188e-01         | 1.947             |              |                   |                  |
| <b>Profile Likelihood</b> |                 |               |               |           |               |               |                |                  |                   |                   |              |                   |                  |
| < 0.0086                  | 67              | 40            | 59.70         | ----      | ----          | ----          | ----           | 3.26             | 2.075             | 4.597             | 2.65e-04     | 2.50e-04          | 7.67e-05         |
| ≥ 0.0086                  | 73              | 63            | 86.30         | 2.080     | 1.394         | 3.102         | 3.322e-04      | 0.93             | 6.188e-01         | 1.947             |              |                   |                  |
| <b>Quantitative*</b>      |                 |               |               |           |               |               |                |                  |                   |                   |              |                   |                  |
|                           | 140             | 103           | 73.57         | 1.000     | 0.985         | 1.016         | 9.600e-01      |                  |                   |                   | 9.602e-01    | 9.600e-01         |                  |

\*Units of pg / mL were used in **Quantitative model only**.

**Cohort: Derivation**  
**Outcome: Transplant Free Survival**  
**Predictor: VCAM1 ( ng / mL )**

|                           | Patients<br>(N) | Events<br>(n) | Events<br>(%) | HR        | HR<br>95% LCL | HR<br>95% UCL | Wald<br>pvalue | Median<br>(yrs.) | Median<br>95% LCL | Median<br>95% UCL | LR<br>pvalue | Logrank<br>pvalue | DevLIN<br>pvalue |
|---------------------------|-----------------|---------------|---------------|-----------|---------------|---------------|----------------|------------------|-------------------|-------------------|--------------|-------------------|------------------|
| <b>Quintiles</b>          |                 |               |               |           |               |               |                |                  |                   |                   |              |                   |                  |
| < 335                     | 27              | 17            | 62.96         | ----      | ----          | ----          | ----           | 1.67             | 7.392e-01         |                   | 3.52e-01     | 3.67e-01          | 7.37e-01         |
| [ 335,402)                | 28              | 19            | 67.86         | 8.290e-01 | 4.296e-01     | 1.600         | 5.762e-01      | 2.95             | 2.034             | 5.522             |              |                   |                  |
| [ 402,457)                | 29              | 23            | 79.31         | 1.264     | 6.741e-01     | 2.371         | 4.650e-01      | 1.11             | 6.626e-01         | 3.880             |              |                   |                  |
| [ 457,572)                | 28              | 22            | 78.57         | 1.369     | 7.245e-01     | 2.587         | 3.333e-01      | 0.82             | 3.587e-01         | 3.261             |              |                   |                  |
| ≥ 572                     | 28              | 22            | 78.57         | 1.436     | 7.609e-01     | 2.709         | 2.643e-01      | 2.09             | 8.378e-01         | 2.932             |              |                   |                  |
| <b>Quartiles</b>          |                 |               |               |           |               |               |                |                  |                   |                   |              |                   |                  |
| < 359                     | 35              | 22            | 62.86         | ----      | ----          | ----          | ----           | 2.43             | 1.144             |                   | 3.75e-02     | 3.46e-02          | 1.29e-01         |
| [ 359,419)                | 33              | 23            | 69.70         | 9.261e-01 | 5.157e-01     | 1.663         | 7.973e-01      | 2.43             | 2.075             |                   |              |                   |                  |
| [ 419,518)                | 37              | 31            | 83.78         | 1.798     | 1.039         | 3.110         | 3.600e-02      | 0.75             | 4.079e-01         | 2.300             |              |                   |                  |
| ≥ 518                     | 35              | 27            | 77.14         | 1.598     | 9.067e-01     | 2.816         | 1.050e-01      | 1.90             | 8.350e-01         | 2.853             |              |                   |                  |
| <b>Tertiles</b>           |                 |               |               |           |               |               |                |                  |                   |                   |              |                   |                  |
| < 378                     | 47              | 30            | 63.83         | ----      | ----          | ----          | ----           | 2.43             | 1.144             |                   | 3.53e-01     | 3.64e-01          | 4.80e-01         |
| [ 378,480)                | 46              | 37            | 80.43         | 1.379     | 8.514e-01     | 2.235         | 1.914e-01      | 1.11             | 7.009e-01         | 2.434             |              |                   |                  |
| ≥ 480                     | 47              | 36            | 76.60         | 1.337     | 8.230e-01     | 2.173         | 2.406e-01      | 1.90             | 9.309e-01         | 2.850             |              |                   |                  |
| <b>Profile Likelihood</b> |                 |               |               |           |               |               |                |                  |                   |                   |              |                   |                  |
| < 418.0                   | 68              | 45            | 66.18         | ----      | ----          | ----          | ----           | 2.43             | 1.703             | 4.085             | 4.21e-03     | 3.95e-03          | 1.81e-02         |
| ≥ 418.0                   | 72              | 58            | 80.56         | 1.769     | 1.194         | 2.619         | 4.418e-03      | 0.95             | 7.009e-01         | 2.127             |              |                   |                  |
| <b>Quantitative</b>       | 140             | 103           | 73.57         | 1.001     | 9.999e-01     | 1.002         | 7.967e-02      |                  |                   |                   | 9.493e-02    | 7.928e-02         |                  |

**Cohort: Derivation**  
**Outcome: Transplant Free Survival**  
**Predictor: S100A12 ( ng / mL )**

|                           | Patients<br>(N) | Events<br>(n) | Events<br>(%) | HR    | HR<br>95% LCL | HR<br>95% UCL | Wald<br>pvalue | Median<br>(yrs.) | Median<br>95% LCL | Median<br>95% UCL | LR<br>pvalue | Logrank<br>pvalue | DevLIN<br>pvalue |
|---------------------------|-----------------|---------------|---------------|-------|---------------|---------------|----------------|------------------|-------------------|-------------------|--------------|-------------------|------------------|
| <b>Quintiles</b>          |                 |               |               |       |               |               |                |                  |                   |                   |              |                   |                  |
| < 15                      | 27              | 16            | 59.26         | ----  | ----          | ----          | ----           | 2.97             | 1.947             |                   | 1.60e-02     | 1.33e-02          | 7.43e-02         |
| [ 15,21.6)                | 29              | 21            | 72.41         | 1.626 | 8.439e-01     | 3.131         | 1.464e-01      | 2.03             | 9.309e-01         | 3.034             |              |                   |                  |
| [ 21.6,29)                | 27              | 18            | 66.67         | 1.280 | 6.507e-01     | 2.517         | 4.747e-01      | 2.61             | 9.062e-01         |                   |              |                   |                  |
| [ 29,51)                  | 28              | 22            | 78.57         | 2.748 | 1.425         | 5.302         | 2.565e-03      | 0.74             | 6.188e-01         | 1.900             |              |                   |                  |
| ≥ 51                      | 29              | 26            | 89.66         | 2.134 | 1.140         | 3.994         | 1.777e-02      | 1.40             | 3.614e-01         | 2.850             |              |                   |                  |
| <b>Quartiles</b>          |                 |               |               |       |               |               |                |                  |                   |                   |              |                   |                  |
| < 17.8                    | 35              | 22            | 62.86         | ----  | ----          | ----          | ----           | 2.43             | 1.714             |                   | 3.45e-02     | 3.70e-02          | 1.85e-01         |
| [ 17.8,25)                | 34              | 23            | 67.65         | 1.395 | 7.723e-01     | 2.521         | 2.696e-01      | 2.13             | 9.500e-01         |                   |              |                   |                  |
| [ 25,45.2)                | 36              | 28            | 77.78         | 1.908 | 1.084         | 3.356         | 2.501e-02      | 0.82             | 7.064e-01         | 3.261             |              |                   |                  |
| ≥ 45.2                    | 35              | 30            | 85.71         | 2.093 | 1.204         | 3.637         | 8.843e-03      | 1.09             | 5.284e-01         | 2.664             |              |                   |                  |
| <b>Tertiles</b>           |                 |               |               |       |               |               |                |                  |                   |                   |              |                   |                  |
| < 19                      | 40              | 26            | 65.00         | ----  | ----          | ----          | ----           | 2.41             | 1.703             | 4.597             | 2.18e-02     | 1.92e-02          | 1.59e-01         |
| [ 19,37)                  | 52              | 37            | 71.15         | 1.328 | 8.006e-01     | 2.204         | 2.717e-01      | 2.08             | 9.062e-01         | 3.751             |              |                   |                  |
| ≥ 37                      | 48              | 40            | 83.33         | 1.984 | 1.207         | 3.260         | 6.857e-03      | 0.82             | 6.407e-01         | 2.127             |              |                   |                  |
| <b>Profile Likelihood</b> |                 |               |               |       |               |               |                |                  |                   |                   |              |                   |                  |
| < 26.5                    | 77              | 50            | 64.94         | ----  | ----          | ----          | ----           | 2.43             | 1.947             | 4.044             | 9.41e-04     | 7.26e-04          | 8.74e-03         |
| ≥ 26.5                    | 63              | 53            | 84.13         | 1.935 | 1.311         | 2.855         | 8.817e-04      | 0.82             | 6.407e-01         | 2.092             |              |                   |                  |
| <b>Quantitative</b>       |                 |               |               |       |               |               |                |                  |                   |                   |              |                   |                  |
|                           | 140             | 103           | 73.57         | 1.004 | 1.001         | 1.008         | 2.295e-02      |                  |                   |                   | 4.321e-02    | 2.168e-02         |                  |



**Cohort: Derivation**

**Outcome: Progression Free Survival by FVC ( Lung Transplant is Censored )**

**Predictor: Age (years)**

|                           | Patients<br>(N) | Events<br>(n) | Events<br>(%) | HR        | HR<br>95% LCL | HR<br>95% UCL | Wald<br>pvalue | Median<br>(yrs.) | Median<br>95% LCL | Median<br>95% UCL | LR<br>pvalue | Logrank<br>pvalue | DevLIN<br>Pvalue |
|---------------------------|-----------------|---------------|---------------|-----------|---------------|---------------|----------------|------------------|-------------------|-------------------|--------------|-------------------|------------------|
| <b>Quintiles</b>          |                 |               |               |           |               |               |                |                  |                   |                   |              |                   |                  |
| < 59.5                    | 26              | 20            | 76.92         | ----      | ----          | ----          | ----           | 1.27             | 1.029             | 2.012             | 9.95e-01     | 9.95e-01          | 6.26e-01         |
| [ 59.5,66.1)              | 28              | 16            | 57.14         | 8.593e-01 | 4.430e-01     | 1.667         | 6.537e-01      | 0.84             | 4.079e-01         | 2.357             |              |                   |                  |
| [ 66.1,69.7)              | 27              | 20            | 74.07         | 9.362e-01 | 5.021e-01     | 1.746         | 8.356e-01      | 0.98             | 7.173e-01         | 2.530             |              |                   |                  |
| [ 69.7,73.9)              | 26              | 23            | 88.46         | 9.437e-01 | 5.165e-01     | 1.724         | 8.504e-01      | 0.95             | 8.241e-01         | 2.491             |              |                   |                  |
| ≥ 73.9                    | 28              | 25            | 89.29         | 9.193e-01 | 5.089e-01     | 1.661         | 7.803e-01      | 0.94             | 6.133e-01         | 2.606             |              |                   |                  |
| <b>Quartiles</b>          |                 |               |               |           |               |               |                |                  |                   |                   |              |                   |                  |
| < 61.2                    | 33              | 24            | 72.73         | ----      | ----          | ----          | ----           | 1.27             | 7.502e-01         | 1.993             | 3.86e-01     | 4.04e-01          | 4.02e-01         |
| [ 61.2,68.5)              | 34              | 24            | 70.59         | 1.068     | 6.038e-01     | 1.888         | 8.218e-01      | 0.78             | 4.517e-01         | 1.717             |              |                   |                  |
| [ 68.5,73.3)              | 35              | 26            | 74.29         | 6.965e-01 | 3.985e-01     | 1.217         | 2.041e-01      | 1.40             | 9.500e-01         | 2.606             |              |                   |                  |
| ≥ 73.3                    | 33              | 30            | 90.91         | 9.948e-01 | 5.799e-01     | 1.707         | 9.848e-01      | 0.90             | 6.133e-01         | 2.300             |              |                   |                  |
| <b>Tertiles</b>           |                 |               |               |           |               |               |                |                  |                   |                   |              |                   |                  |
| < 64.7                    | 45              | 31            | 68.89         | ----      | ----          | ----          | ----           | 1.27             | 8.378e-01         | 1.993             | 8.23e-01     | 8.20e-01          | 1.50e-02         |
| [ 64.7,71.3)              | 45              | 32            | 71.11         | 1.044     | 6.365e-01     | 1.712         | 8.646e-01      | 1.05             | 8.624e-01         | 2.275             |              |                   |                  |
| ≥ 71.3                    | 45              | 41            | 91.11         | 1.154     | 7.221e-01     | 1.844         | 5.494e-01      | 0.92             | 7.392e-01         | 1.714             |              |                   |                  |
| <b>Profile Likelihood</b> |                 |               |               |           |               |               |                |                  |                   |                   |              |                   |                  |
| <67.9                     | 64              | 46            | 71.88         | ----      | ----          | ----          | ----           | 1.03             | 6.708e-01         | 1.588             | 2.44e-01     | 2.40e-01          | 1.79e-01         |
| ≥67.9                     | 71              | 58            | 81.69         | 7.927e-01 | 5.374e-01     | 1.169         | 2.415e-01      | 1.05             | 9.008e-01         | 2.078             |              |                   |                  |
| <b>Quantitative</b>       |                 |               |               |           |               |               |                |                  |                   |                   |              |                   |                  |
|                           | 135             | 104           | 77.04         | 9.930e-01 | 9.675e-01     | 1.019         | 5.949e-01      |                  |                   |                   | 5.956e-01    | 5.948e-01         |                  |
| <b>Predictor: Gender</b>  |                 |               |               |           |               |               |                |                  |                   |                   |              |                   |                  |
| Female                    | 36              | 25            | 69.44         | ----      | ----          | ----          | ----           | 1.40             | 0.901             | 2.13              |              |                   |                  |
| Male                      | 99              | 79            | 79.80         | 1.32      | 0.841         | 2.076         | 2.27E-01       | 0.96             | 0.824             | 1.27              | 2.17E-01     | 2.25E-01          |                  |

**Cohort: Derivation**  
**Outcome: Progression Free Survival by FVC ( Lung Transplant is Censored )**  
**Predictor: Baseline (4-month) FVC % Predicted**

|                           | Patients<br>(N) | Events<br>(n) | Events<br>(%) | HR        | HR<br>95% LCL | HR<br>95% UCL | Wald<br>pvalue | Median<br>(yrs.) | Median<br>95% LCL | Median<br>95% UCL | LR<br>pvalue | Logrank<br>pvalue | DevLIN<br>pvalue |
|---------------------------|-----------------|---------------|---------------|-----------|---------------|---------------|----------------|------------------|-------------------|-------------------|--------------|-------------------|------------------|
| <b>Quintiles</b>          |                 |               |               |           |               |               |                |                  |                   |                   |              |                   |                  |
| < 43.3                    | 24              | 16            | 66.67         | ----      | ----          | ----          | ----           | 0.79             | 3.313e-01         |                   | 3.08e-04     | 4.46e-04          | 2.37e-02         |
| [ 43.3,56.6)              | 24              | 16            | 66.67         | 5.260e-01 | 2.613e-01     | 1.059         | 7.176e-02      | 1.72             | 7.775e-01         | 2.606             |              |                   |                  |
| [ 56.6,66)                | 23              | 19            | 82.61         | 7.053e-01 | 3.585e-01     | 1.387         | 3.118e-01      | 0.72             | 4.983e-01         | 1.311             |              |                   |                  |
| [ 66,77)                  | 22              | 19            | 86.36         | 7.986e-01 | 4.095e-01     | 1.557         | 5.093e-01      | 0.94             | 6.708e-01         | 1.947             |              |                   |                  |
| ≥ 77                      | 25              | 19            | 76.00         | 2.385e-01 | 1.159e-01     | 4.907e-01     | 9.869e-05      | 2.23             | 1.273             | 4.616             |              |                   |                  |
| <b>Quartiles</b>          |                 |               |               |           |               |               |                |                  |                   |                   |              |                   |                  |
| < 47.8                    | 30              | 21            | 70.00         | ----      | ----          | ----          | ----           | 0.67             | 3.313e-01         | 2.127             | 1.31e-03     | 1.15e-03          | 8.95e-02         |
| [ 47.8,61.1)              | 30              | 22            | 73.33         | 6.081e-01 | 3.328e-01     | 1.111         | 1.059e-01      | 1.31             | 8.241e-01         | 2.086             |              |                   |                  |
| [ 61.1,74)                | 28              | 22            | 78.57         | 6.173e-01 | 3.358e-01     | 1.135         | 1.205e-01      | 0.92             | 7.091e-01         | 2.034             |              |                   |                  |
| ≥ 74                      | 30              | 24            | 80.00         | 2.921e-01 | 1.554e-01     | 5.493e-01     | 1.338e-04      | 1.97             | 1.112             | 4.044             |              |                   |                  |
| <b>Tertiles</b>           |                 |               |               |           |               |               |                |                  |                   |                   |              |                   |                  |
| < 52.8                    | 40              | 26            | 65.00         | ----      | ----          | ----          | ----           | 0.79             | 5.010e-01         | 1.717             | 3.56e-03     | 3.72e-03          | 4.46e-01         |
| [ 52.8,69.9)              | 40              | 32            | 80.00         | 8.177e-01 | 4.843e-01     | 1.380         | 4.513e-01      | 0.91             | 6.324e-01         | 1.925             |              |                   |                  |
| ≥ 69.9                    | 38              | 31            | 81.58         | 4.197e-01 | 2.413e-01     | 7.301e-01     | 2.114e-03      | 1.40             | 1.144             | 3.105             |              |                   |                  |
| <b>Profile Likelihood</b> |                 |               |               |           |               |               |                |                  |                   |                   |              |                   |                  |
| < 76.9                    | 93              | 70            | 75.27         | ----      | ----          | ----          | ----           | 0.90             | 7.091e-01         | 1.311             | 2.70e-05     | 6.54e-05          | 5.68e-03         |
| ≥ 76.9                    | 25              | 19            | 76.00         | 3.362e-01 | 1.928e-01     | 5.861e-01     | 1.214e-04      | 2.23             | 1.273             | 4.616             |              |                   |                  |
| <b>Quantitative</b>       |                 |               |               |           |               |               |                |                  |                   |                   |              |                   |                  |
|                           | 118             | 89            | 75.42         | 9.821e-01 | 9.710e-01     | 9.933e-01     | 1.837e-03      |                  |                   |                   | 1.572e-03    | 1.788e-03         |                  |

Cohort: **Derivation**

Outcome: **Progression Free Survival by FVC ( Lung Transplant is Censored )**

Predictor: **Baseline (4-month) DLco % Predicted**

|                           | Patients<br>(N) | Events<br>(n) | Events<br>(%) | HR        | HR<br>95% LCL | HR<br>95% UCL | Wald<br>pvalue | Median<br>(yrs.) | Median<br>95% LCL | Median<br>95% UCL | LR<br>pvalue | Logrank<br>pvalue | DevLIN<br>pvalue |
|---------------------------|-----------------|---------------|---------------|-----------|---------------|---------------|----------------|------------------|-------------------|-------------------|--------------|-------------------|------------------|
| <b>Quintiles</b>          |                 |               |               |           |               |               |                |                  |                   |                   |              |                   |                  |
| < 28.9                    | 21              | 15            | 71.43         | ----      | ----          | ----          | ----           | 0.90             | 3.833e-01         |                   | 1.34e-04     | 1.45e-04          | 3.73e-01         |
| [ 28.9,39)                | 22              | 16            | 72.73         | 1.043     | 5.131e-01     | 2.120         | 9.077e-01      | 0.82             | 3.258e-01         | 1.402             |              |                   |                  |
| [ 39,49.4)                | 21              | 18            | 85.71         | 6.202e-01 | 3.108e-01     | 1.238         | 1.754e-01      | 1.34             | 6.708e-01         | 2.078             |              |                   |                  |
| [ 49.4,60)                | 20              | 17            | 85.00         | 4.764e-01 | 2.329e-01     | 9.745e-01     | 4.229e-02      | 1.25             | 8.624e-01         | 2.086             |              |                   |                  |
| ≥ 60                      | 22              | 16            | 72.73         | 2.152e-01 | 9.900e-02     | 4.678e-01     | 1.055e-04      | 2.53             | 1.273             |                   |              |                   |                  |
| <b>Quartiles</b>          |                 |               |               |           |               |               |                |                  |                   |                   |              |                   |                  |
| < 31.6                    | 26              | 20            | 76.92         | ----      | ----          | ----          | ----           | 0.90             | 7.775e-01         | 1.714             | 9.29e-05     | 7.10e-05          | 2.16e-01         |
| [ 31.6,43.8)              | 27              | 20            | 74.07         | 1.201     | 6.441e-01     | 2.238         | 5.649e-01      | 0.71             | 3.313e-01         | 1.572             |              |                   |                  |
| [ 43.8,57)                | 25              | 22            | 88.00         | 5.566e-01 | 3.000e-01     | 1.033         | 6.317e-02      | 1.34             | 8.049e-01         | 2.086             |              |                   |                  |
| ≥ 57                      | 28              | 20            | 71.43         | 2.937e-01 | 1.506e-01     | 5.728e-01     | 3.237e-04      | 2.36             | 1.273             | 4.616             |              |                   |                  |
| <b>Tertiles</b>           |                 |               |               |           |               |               |                |                  |                   |                   |              |                   |                  |
| < 36.6                    | 35              | 24            | 68.57         | ----      | ----          | ----          | ----           | 0.84             | 6.708e-01         | 1.402             | 8.14e-04     | 5.97e-04          | 7.06e-01         |
| [ 36.6,53.4)              | 37              | 32            | 86.49         | 6.150e-01 | 3.594e-01     | 1.052         | 7.612e-02      | 1.11             | 7.392e-01         | 1.925             |              |                   |                  |
| ≥ 53.4                    | 34              | 26            | 76.47         | 3.235e-01 | 1.786e-01     | 5.860e-01     | 1.967e-04      | 2.09             | 1.112             | 3.274             |              |                   |                  |
| <b>Profile Likelihood</b> |                 |               |               |           |               |               |                |                  |                   |                   |              |                   |                  |
| <43.9                     | 54              | 41            | 75.93         | ----      | ----          | ----          | ----           | 0.84             | 6.324e-01         | 1.087             | 1.71e-05     | 7.64e-06          | 1.81e-01         |
| ≥43.9                     | 52              | 41            | 78.85         | 3.557e-01 | 2.222e-01     | 5.691e-01     | 1.636e-05      | 1.95             | 1.246             | 2.491             |              |                   |                  |
| <b>Quantitative</b>       |                 |               |               |           |               |               |                |                  |                   |                   |              |                   |                  |
|                           | 106             | 82            | 77.36         | 9.695e-01 | 9.559e-01     | 9.833e-01     | 1.656e-05      |                  |                   |                   | 1.547e-05    | 1.301e-05         |                  |

**Cohort: Derivation**  
**Outcome: Progression Free Survival by FVC ( Lung Transplant is Censored )**  
**Predictor: Baseline (4-month) CPI**

|                           | Patients<br>(N) | Events<br>(n) | Events<br>(%) | HR    | HR<br>95% LCL | HR<br>95% UCL | Wald<br>pvalue | Median<br>(yrs.) | Median<br>95% LCL | Median<br>95% UCL | LR<br>pvalue | Logrank<br>pvalue | DevLIN<br>pvalue |
|---------------------------|-----------------|---------------|---------------|-------|---------------|---------------|----------------|------------------|-------------------|-------------------|--------------|-------------------|------------------|
| <b>Quintiles</b>          |                 |               |               |       |               |               |                |                  |                   |                   |              |                   |                  |
| < 43                      | 22              | 17            | 77.27         | ----  | ----          | ----          | ----           | 2.36             | 1.333             |                   | 1.17e-04     | 4.61e-05          | 7.25e-01         |
| [ 43,50.8)                | 20              | 16            | 80.00         | 1.447 | 7.139e-01     | 2.932         | 3.055e-01      | 1.36             | 1.029             | 4.044             |              |                   |                  |
| [ 50.8,58.7)              | 21              | 19            | 90.48         | 2.809 | 1.389         | 5.680         | 4.039e-03      | 1.11             | 6.133e-01         | 2.012             |              |                   |                  |
| [ 58.7,64.5)              | 22              | 14            | 63.64         | 3.137 | 1.475         | 6.668         | 2.971e-03      | 0.82             | 6.708e-01         |                   |              |                   |                  |
| ≥ 64.5                    | 21              | 16            | 76.19         | 5.291 | 2.503         | 1.118e+01     | 1.283e-05      | 0.78             | 3.258e-01         |                   |              |                   |                  |
| <b>Quartiles</b>          |                 |               |               |       |               |               |                |                  |                   |                   |              |                   |                  |
| < 44.4                    | 25              | 19            | 76.00         | ----  | ----          | ----          | ----           | 2.36             | 1.273             | 4.616             | 1.09e-04     | 3.56e-05          | 8.96e-01         |
| [ 44.4,56)                | 27              | 23            | 85.19         | 1.803 | 9.606e-01     | 3.383         | 6.652e-02      | 1.25             | 8.624e-01         | 2.086             |              |                   |                  |
| [ 56,62.7)                | 27              | 22            | 81.48         | 2.621 | 1.363         | 5.041         | 3.888e-03      | 0.98             | 7.091e-01         | 1.717             |              |                   |                  |
| ≥ 62.7                    | 27              | 18            | 66.67         | 5.044 | 2.487         | 1.023e+01     | 7.322e-06      | 0.78             | 3.258e-01         |                   |              |                   |                  |
| <b>Tertiles</b>           |                 |               |               |       |               |               |                |                  |                   |                   |              |                   |                  |
| < 47.7                    | 34              | 26            | 76.47         | ----  | ----          | ----          | ----           | 2.08             | 1.273             | 4.044             | 5.56e-05     | 2.69e-05          | 7.34e-01         |
| [ 47.7,59.8)              | 37              | 32            | 86.49         | 2.076 | 1.209         | 3.564         | 8.080e-03      | 1.11             | 7.173e-01         | 1.925             |              |                   |                  |
| ≥ 59.8                    | 35              | 24            | 68.57         | 3.878 | 2.118         | 7.101         | 1.120e-05      | 0.82             | 3.833e-01         | 9.500e-01         |              |                   |                  |
| <b>Profile Likelihood</b> |                 |               |               |       |               |               |                |                  |                   |                   |              |                   |                  |
| <51.0                     | 42              | 33            | 78.57         | ----  | ----          | ----          | ----           | 2.03             | 1.273             | 3.105             | 1.55e-05     | 1.35e-05          | 2.54e-01         |
| ≥51.0                     | 64              | 49            | 76.56         | 2.845 | 1.744         | 4.640         | 2.808e-05      | 0.84             | 6.708e-01         | 1.246             |              |                   |                  |
| <b>Quantitative</b>       | 106             | 82            | 77.36         | 1.044 | 1.025         | 1.064         | 4.613e-06      |                  |                   |                   | 4.169e-06    | 4.507e-06         |                  |

**Cohort: Derivation**  
**Outcome: Progression Free Survival by FVC ( Lung Transplant is Censored )**  
**Predictor: Baseline (3-month) FVC % Predicted**

|                           | Patients<br>(N) | Events<br>(n) | Events<br>(%) | HR        | HR<br>95% LCL | HR<br>95% UCL | Wald<br>pvalue | Median<br>(yrs.) | Median<br>95% LCL | Median<br>95% UCL | LR<br>pvalue | Logrank<br>pvalue | DevLIN<br>pvalue |
|---------------------------|-----------------|---------------|---------------|-----------|---------------|---------------|----------------|------------------|-------------------|-------------------|--------------|-------------------|------------------|
| <b>Quintiles</b>          |                 |               |               |           |               |               |                |                  |                   |                   |              |                   |                  |
| < 43.1                    | 22              | 14            | 63.64         | ----      | ----          | ----          | ----           | 0.67             | 3.258e-01         |                   | 1.38e-03     | 2.31e-03          | 1.05e-01         |
| [ 43.1,56.5)              | 21              | 13            | 61.90         | 6.130e-01 | 2.867e-01     | 1.310         | 2.067e-01      | 1.57             | 4.873e-01         |                   |              |                   |                  |
| [ 56.5,65.7)              | 22              | 18            | 81.82         | 7.273e-01 | 3.578e-01     | 1.479         | 3.791e-01      | 0.72             | 3.751e-01         | 1.925             |              |                   |                  |
| [ 65.7,76.7)              | 19              | 16            | 84.21         | 7.981e-01 | 3.883e-01     | 1.641         | 5.396e-01      | 0.94             | 6.133e-01         | 2.034             |              |                   |                  |
| ≥ 76.7                    | 22              | 16            | 72.73         | 2.439e-01 | 1.121e-01     | 5.307e-01     | 3.748e-04      | 2.23             | 1.273             |                   |              |                   |                  |
| <b>Quartiles</b>          |                 |               |               |           |               |               |                |                  |                   |                   |              |                   |                  |
| < 47.8                    | 27              | 18            | 66.67         | ----      | ----          | ----          | ----           | 0.50             | 3.285e-01         |                   | 1.05e-03     | 1.00e-03          | 6.35e-02         |
| [ 47.8,60.5)              | 27              | 19            | 70.37         | 6.046e-01 | 3.156e-01     | 1.158         | 1.293e-01      | 1.03             | 6.324e-01         | 2.530             |              |                   |                  |
| [ 60.5,73.4)              | 27              | 21            | 77.78         | 5.777e-01 | 3.035e-01     | 1.100         | 9.471e-02      | 0.91             | 6.133e-01         | 2.034             |              |                   |                  |
| ≥ 73.4                    | 25              | 19            | 76.00         | 2.528e-01 | 1.253e-01     | 5.098e-01     | 1.217e-04      | 2.08             | 1.144             | 4.616             |              |                   |                  |
| <b>Tertiles</b>           |                 |               |               |           |               |               |                |                  |                   |                   |              |                   |                  |
| < 52.4                    | 36              | 22            | 61.11         | ----      | ----          | ----          | ----           | 0.78             | 3.587e-01         | 2.127             | 6.02e-03     | 6.16e-03          | 6.14e-01         |
| [ 52.4,69.6)              | 36              | 28            | 77.78         | 7.997e-01 | 4.546e-01     | 1.407         | 4.379e-01      | 0.91             | 4.983e-01         | 1.717             |              |                   |                  |
| ≥ 69.6                    | 34              | 27            | 79.41         | 4.070e-01 | 2.238e-01     | 7.401e-01     | 3.218e-03      | 1.95             | 1.144             | 3.105             |              |                   |                  |
| <b>Profile Likelihood</b> |                 |               |               |           |               |               |                |                  |                   |                   |              |                   |                  |
| < 76.7                    | 84              | 61            | 72.62         | ----      | ----          | ----          | ----           | 0.86             | 6.133e-01         | 1.333             | 6.01e-05     | 1.39e-04          | 1.30e-02         |
| ≥ 76.7                    | 22              | 16            | 72.73         | 3.229e-01 | 1.761e-01     | 5.921e-01     | 2.578e-04      | 2.23             | 1.273             |                   |              |                   |                  |
| <b>Quantitative</b>       | 106             | 77            | 72.64         | 9.809e-01 | 9.692e-01     | 9.928e-01     | 1.696e-03      |                  |                   |                   | 1.477e-03    | 1.661e-03         |                  |

**Cohort: Derivation**

**Outcome: Progression Free Survival by FVC ( Lung Transplant is Censored )**

**Predictor: Baseline (3-month) DLco % Predicted**

|                           | Patients<br>(N) | Events<br>(n) | Events<br>(%) | HR        | HR<br>95% LCL | HR<br>95% UCL | Wald<br>pvalue | Median<br>(yrs.) | Median<br>95% LCL | Median<br>95% UCL | LR<br>pvalue | Logrank<br>pvalue | DevLIN<br>pvalue |
|---------------------------|-----------------|---------------|---------------|-----------|---------------|---------------|----------------|------------------|-------------------|-------------------|--------------|-------------------|------------------|
| <b>Quintiles</b>          |                 |               |               |           |               |               |                |                  |                   |                   |              |                   |                  |
| < 28.6                    | 18              | 14            | 77.78         | ----      | ----          | ----          | ----           | 0.90             | 2.300e-01         | 2.127             | 2.75e-04     | 3.15e-04          | 3.34e-01         |
| [ 28.6,38)                | 18              | 10            | 55.56         | 8.671e-01 | 3.815e-01     | 1.971         | 7.335e-01      | 0.33             | 2.683e-01         |                   |              |                   |                  |
| [ 38,49.9)                | 20              | 17            | 85.00         | 6.062e-01 | 2.976e-01     | 1.235         | 1.680e-01      | 1.09             | 6.708e-01         | 2.034             |              |                   |                  |
| [ 49.9,61)                | 18              | 15            | 83.33         | 4.540e-01 | 2.158e-01     | 9.549e-01     | 3.736e-02      | 1.25             | 8.049e-01         | 2.357             |              |                   |                  |
| ≥ 61                      | 20              | 14            | 70.00         | 1.822e-01 | 7.963e-02     | 4.170e-01     | 5.565e-05      | 3.10             | 1.273             |                   |              |                   |                  |
| <b>Quartiles</b>          |                 |               |               |           |               |               |                |                  |                   |                   |              |                   |                  |
| < 31.4                    | 23              | 17            | 73.91         | ----      | ----          | ----          | ----           | 0.91             | 6.708e-01         | 2.127             | 3.82e-05     | 4.36e-05          | 6.93e-02         |
| [ 31.4,41.3)              | 24              | 17            | 70.83         | 1.430     | 7.230e-01     | 2.828         | 3.041e-01      | 0.63             | 3.258e-01         | 1.572             |              |                   |                  |
| [ 41.3,57.2)              | 23              | 20            | 86.96         | 6.895e-01 | 3.582e-01     | 1.327         | 2.657e-01      | 1.14             | 6.708e-01         | 2.012             |              |                   |                  |
| ≥ 57.2                    | 24              | 16            | 66.67         | 2.581e-01 | 1.224e-01     | 5.440e-01     | 3.712e-04      | 2.53             | 1.993             |                   |              |                   |                  |
| <b>Tertiles</b>           |                 |               |               |           |               |               |                |                  |                   |                   |              |                   |                  |
| < 34.5                    | 31              | 21            | 67.74         | ----      | ----          | ----          | ----           | 0.90             | 3.313e-01         | 1.714             | 7.97e-04     | 7.84e-04          | 4.65e-01         |
| [ 34.5,54.3)              | 32              | 26            | 81.25         | 7.283e-01 | 4.080e-01     | 1.300         | 2.834e-01      | 0.98             | 6.324e-01         | 1.925             |              |                   |                  |
| ≥ 54.3                    | 31              | 23            | 74.19         | 3.161e-01 | 1.672e-01     | 5.976e-01     | 3.930e-04      | 2.36             | 1.144             | 4.153             |              |                   |                  |
| <b>Profile Likelihood</b> |                 |               |               |           |               |               |                |                  |                   |                   |              |                   |                  |
| <57.5                     | 70              | 54            | 77.14         | ----      | ----          | ----          | ----           | 0.90             | 6.708e-01         | 1.311             | 1.63e-05     | 3.69e-05          | 5.65e-02         |
| ≥57.5                     | 24              | 16            | 66.67         | 2.897e-01 | 1.564e-01     | 5.368e-01     | 8.224e-05      | 2.53             | 1.993             |                   |              |                   |                  |
| <b>Quantitative</b>       | 94              | 70            | 74.47         | 9.693e-01 | 9.551e-01     | 9.838e-01     | 3.671e-05      |                  |                   |                   | 3.568e-05    | 2.665e-05         |                  |

Cohort: **Derivation**

Outcome: **Progression Free Survival by FVC ( Lung Transplant is Censored )**

Predictor: **Baseline (3-month) CPI**

|                           | Patients<br>(N) | Events<br>(n) | Events<br>(%) | HR    | HR<br>95% LCL | HR<br>95% UCL | Wald<br>pvalue | Median<br>(yrs.) | Median<br>95% LCL | Median<br>95% UCL | LR<br>pvalue | Logrank<br>pvalue | DevLIN<br>pvalue |
|---------------------------|-----------------|---------------|---------------|-------|---------------|---------------|----------------|------------------|-------------------|-------------------|--------------|-------------------|------------------|
| <b>Quintiles</b>          |                 |               |               |       |               |               |                |                  |                   |                   |              |                   |                  |
| < 42.8                    | 19              | 14            | 73.68         | ----  | ----          | ----          | ----           | 2.36             | 1.333             |                   | 1.82e-04     | 7.92e-05          | 7.15e-01         |
| [ 42.8,51.5)              | 18              | 14            | 77.78         | 1.574 | 7.255e-01     | 3.416         | 2.509e-01      | 1.95             | 9.199e-01         |                   |              |                   |                  |
| [ 51.5,59)                | 19              | 16            | 84.21         | 3.117 | 1.421         | 6.837         | 4.551e-03      | 1.11             | 4.517e-01         | 2.012             |              |                   |                  |
| [ 59,65.1)                | 19              | 11            | 57.89         | 3.545 | 1.500         | 8.375         | 3.923e-03      | 0.71             | 6.708e-01         |                   |              |                   |                  |
| ≥ 65.1                    | 19              | 15            | 78.95         | 5.843 | 2.595         | 1.315e+01     | 2.018e-05      | 0.38             | 2.300e-01         |                   |              |                   |                  |
| <b>Quartiles</b>          |                 |               |               |       |               |               |                |                  |                   |                   |              |                   |                  |
| < 44.3                    | 23              | 18            | 78.26         | ----  | ----          | ----          | ----           | 2.36             | 1.273             | 4.616             | 3.22e-04     | 1.36e-04          | 8.77e-01         |
| [ 44.3,56.1)              | 24              | 18            | 75.00         | 1.536 | 7.808e-01     | 3.023         | 2.137e-01      | 1.25             | 7.173e-01         |                   |              |                   |                  |
| [ 56.1,62.8)              | 24              | 19            | 79.17         | 3.059 | 1.522         | 6.147         | 1.693e-03      | 0.95             | 6.324e-01         | 1.572             |              |                   |                  |
| ≥ 62.8                    | 23              | 15            | 65.22         | 4.520 | 2.137         | 9.559         | 7.909e-05      | 0.78             | 3.258e-01         |                   |              |                   |                  |
| <b>Tertiles</b>           |                 |               |               |       |               |               |                |                  |                   |                   |              |                   |                  |
| < 47.6                    | 31              | 23            | 74.19         | ----  | ----          | ----          | ----           | 2.08             | 1.273             | 4.153             | 8.70e-05     | 3.65e-05          | 7.94e-01         |
| [ 47.6,59.9)              | 32              | 27            | 84.38         | 2.113 | 1.183         | 3.774         | 1.150e-02      | 0.98             | 6.324e-01         | 1.925             |              |                   |                  |
| ≥ 59.9                    | 31              | 20            | 64.52         | 4.326 | 2.221         | 8.424         | 1.655e-05      | 0.71             | 3.313e-01         | 9.500e-01         |              |                   |                  |
| <b>Profile Likelihood</b> |                 |               |               |       |               |               |                |                  |                   |                   |              |                   |                  |
| <50.8                     | 37              | 28            | 75.68         | ----  | ----          | ----          | ----           | 2.03             | 1.273             | 3.261             | 2.41e-05     | 2.11e-05          | 2.71e-01         |
| ≥50.8                     | 57              | 42            | 73.68         | 3.056 | 1.788         | 5.226         | 4.462e-05      | 0.78             | 5.010e-01         | 1.311             |              |                   |                  |
| <b>Quantitative</b>       | 94              | 70            | 74.47         | 1.046 | 1.026         | 1.067         | 7.454e-06      |                  |                   |                   | 7.321e-06    | 6.775e-06         |                  |

**Cohort: Derivation**  
**Outcome: Progression Free Survival by FVC ( Lung Transplant is Censored )**  
**Predictor: MMP7 ( ng / mL )**

|                           | Patients<br>(N) | Events<br>(n) | Events<br>(%) | HR        | HR<br>95% LCL | HR<br>95% UCL | Wald<br>pvalue | Median<br>(yrs.) | Median<br>95% LCL | Median<br>95% UCL | LR<br>pvalue | Logrank<br>pvalue | DevLIN<br>pvalue |
|---------------------------|-----------------|---------------|---------------|-----------|---------------|---------------|----------------|------------------|-------------------|-------------------|--------------|-------------------|------------------|
| <b>Quintiles</b>          |                 |               |               |           |               |               |                |                  |                   |                   |              |                   |                  |
| < 2.7                     | 26              | 21            | 80.77         | ----      | ----          | ----          | ----           | 1.27             | 8.624e-01         | 2.606             | 5.05e-03     | 2.57e-03          | 2.25e-02         |
| [ 2.7,3.76)               | 23              | 17            | 73.91         | 6.513e-01 | 3.421e-01     | 1.240         | 1.918e-01      | 2.08             | 9.199e-01         |                   |              |                   |                  |
| [ 3.76,4.99)              | 27              | 17            | 62.96         | 7.609e-01 | 3.986e-01     | 1.453         | 4.074e-01      | 1.36             | 8.049e-01         |                   |              |                   |                  |
| [ 4.99,6.41)              | 26              | 23            | 88.46         | 2.056     | 1.128         | 3.748         | 1.863e-02      | 0.53             | 3.313e-01         | 1.402             |              |                   |                  |
| ≥ 6.41                    | 26              | 20            | 76.92         | 1.351     | 7.240e-01     | 2.521         | 3.444e-01      | 0.95             | 8.241e-01         | 2.111             |              |                   |                  |
| <b>Quartiles</b>          |                 |               |               |           |               |               |                |                  |                   |                   |              |                   |                  |
| < 2.92                    | 32              | 25            | 78.12         | ----      | ----          | ----          | ----           | 1.34             | 9.582e-01         | 2.664             | 2.10e-02     | 1.78e-02          | 1.43e-01         |
| [ 2.92,4.3)               | 30              | 21            | 70.00         | 9.673e-01 | 5.404e-01     | 1.731         | 9.109e-01      | 1.72             | 8.049e-01         |                   |              |                   |                  |
| [ 4.3,5.73)               | 33              | 25            | 75.76         | 1.663     | 9.484e-01     | 2.918         | 7.589e-02      | 0.94             | 5.749e-01         | 1.993             |              |                   |                  |
| ≥ 5.73                    | 33              | 27            | 81.82         | 2.082     | 1.181         | 3.670         | 1.123e-02      | 0.86             | 6.133e-01         | 1.588             |              |                   |                  |
| <b>Tertiles</b>           |                 |               |               |           |               |               |                |                  |                   |                   |              |                   |                  |
| < 3.51                    | 43              | 32            | 74.42         | ----      | ----          | ----          | ----           | 1.72             | 1.144             | 2.664             | 1.45e-02     | 1.34e-02          | 1.49e-01         |
| [ 3.51,5.35)              | 42              | 30            | 71.43         | 1.460     | 8.847e-01     | 2.409         | 1.387e-01      | 0.94             | 6.708e-01         | 1.572             |              |                   |                  |
| ≥ 5.35                    | 43              | 36            | 83.72         | 2.070     | 1.265         | 3.387         | 3.786e-03      | 0.86             | 6.324e-01         | 1.925             |              |                   |                  |
| <b>Profile Likelihood</b> |                 |               |               |           |               |               |                |                  |                   |                   |              |                   |                  |
| < 4.4                     | 66              | 49            | 74.24         | ----      | ----          | ----          | ----           | 1.57             | 1.112             | 2.491             | 1.69e-04     | 1.20e-04          | 1.45e-03         |
| ≥ 4.4                     | 62              | 49            | 79.03         | 2.265     | 1.479         | 3.469         | 1.693e-04      | 0.84             | 6.324e-01         | 1.087             |              |                   |                  |
| <b>Quantitative</b>       |                 |               |               |           |               |               |                |                  |                   |                   |              |                   |                  |
|                           | 128             | 98            | 76.56         | 1.077     | 1.010         | 1.149         | 2.271e-02      |                  |                   |                   | 2.992e-02    | 2.232e-02         |                  |



**Cohort: Derivation**

**Outcome: Progression Free Survival by FVC ( Lung Transplant is Censored )**

**Predictor: ICAM1 ( ng / mL )**

|                           | Patients<br>(N) | Events<br>(n) | Events<br>(%) | HR        | HR<br>95% LCL | HR<br>95% UCL | Wald<br>pvalue | Median<br>(yrs.) | Median<br>95% LCL | Median<br>95% UCL | LR<br>pvalue | Logrank<br>pvalue | DevLIN<br>pvalue |
|---------------------------|-----------------|---------------|---------------|-----------|---------------|---------------|----------------|------------------|-------------------|-------------------|--------------|-------------------|------------------|
| <b>Quintiles</b>          |                 |               |               |           |               |               |                |                  |                   |                   |              |                   |                  |
| < 158                     | 27              | 23            | 85.19         | ----      | ----          | ----          | ----           | 1.13             | 9.199e-01         | 2.357             | 3.73e-01     | 3.67e-01          | 2.31e-01         |
| [ 158,205)                | 26              | 18            | 69.23         | 8.189e-01 | 4.397e-01     | 1.525         | 5.289e-01      | 1.36             | 8.624e-01         | 2.664             |              |                   |                  |
| [ 205,252)                | 27              | 21            | 77.78         | 1.336     | 7.380e-01     | 2.419         | 3.387e-01      | 0.67             | 4.079e-01         | 2.606             |              |                   |                  |
| [ 252,351)                | 27              | 19            | 70.37         | 1.503     | 8.118e-01     | 2.783         | 1.948e-01      | 0.94             | 5.284e-01         | 2.034             |              |                   |                  |
| ≥ 351                     | 28              | 23            | 82.14         | 1.079     | 6.012e-01     | 1.936         | 7.993e-01      | 1.40             | 8.241e-01         | 2.086             |              |                   |                  |
| <b>Quartiles</b>          |                 |               |               |           |               |               |                |                  |                   |                   |              |                   |                  |
| < 175                     | 32              | 27            | 84.38         | ----      | ----          | ----          | ----           | 1.11             | 9.199e-01         | 2.300             | 7.82e-01     | 7.84e-01          | 5.61e-01         |
| [ 175,230)                | 35              | 27            | 77.14         | 1.290     | 7.535e-01     | 2.209         | 3.531e-01      | 0.80             | 6.324e-01         | 2.127             |              |                   |                  |
| [ 230,318)                | 33              | 21            | 63.64         | 1.112     | 6.274e-01     | 1.972         | 7.157e-01      | 1.09             | 6.708e-01         | 3.031             |              |                   |                  |
| ≥ 318                     | 35              | 29            | 82.86         | 1.248     | 7.352e-01     | 2.117         | 4.123e-01      | 0.98             | 8.241e-01         | 1.947             |              |                   |                  |
| <b>Tertiles</b>           |                 |               |               |           |               |               |                |                  |                   |                   |              |                   |                  |
| < 197                     | 46              | 36            | 78.26         | ----      | ----          | ----          | ----           | 1.27             | 1.029             | 2.231             | 2.15e-01     | 2.22e-01          | 3.89e-01         |
| [ 197,274)                | 43              | 33            | 76.74         | 1.486     | 9.228e-01     | 2.393         | 1.032e-01      | 0.79             | 6.133e-01         | 2.275             |              |                   |                  |
| ≥ 274                     | 46              | 35            | 76.09         | 1.365     | 8.542e-01     | 2.181         | 1.932e-01      | 0.94             | 8.241e-01         | 1.717             |              |                   |                  |
| <b>Profile Likelihood</b> |                 |               |               |           |               |               |                |                  |                   |                   |              |                   |                  |
| <202.5                    | 50              | 38            | 76.00         | ----      | ----          | ----          | ----           | 1.34             | 1.054             | 2.300             | 3.14e-02     | 3.30e-02          | 6.74e-02         |
| ≥202.5                    | 85              | 66            | 77.65         | 1.544     | 1.033         | 2.306         | 3.410e-02      | 0.86             | 7.392e-01         | 1.333             |              |                   |                  |
| <b>Quantitative</b>       | 135             | 104           | 77.04         | 1.001     | 9.995e-01     | 1.002         | 2.172e-01      |                  |                   |                   | 2.287e-01    | 2.168e-01         |                  |

Cohort: **Derivation**

Outcome: **Progression Free Survival by FVC ( Lung Transplant is Censored )**

Predictor: **IL8 ( ng / mL )**

|                           | Patients<br>(N) | Events<br>(n) | Events<br>(%) | HR        | HR<br>95% LCL | HR<br>95% UCL | Wald<br>pvalue | Median<br>(yrs.) | Median<br>95% LCL | Median<br>95% UCL | LR<br>pvalue | Logrank<br>pvalue | DevLIN<br>pvalue |
|---------------------------|-----------------|---------------|---------------|-----------|---------------|---------------|----------------|------------------|-------------------|-------------------|--------------|-------------------|------------------|
| <b>Quintiles</b>          |                 |               |               |           |               |               |                |                  |                   |                   |              |                   |                  |
| < 0.0051                  | 25              | 16            | 64.00         | ----      | ----          | ----          | ----           | 1.25             | 1.054             | 2.491             | 1.80e-02     | 1.29e-02          | 2.53e-03         |
| [ 0.0051,0.00776)         | 27              | 21            | 77.78         | 2.149     | 1.118         | 4.130         | 2.174e-02      | 1.92             | 1.029             | 3.261             |              |                   |                  |
| [ 0.00776,0.00968)        | 28              | 21            | 75.00         | 9.005e-01 | 4.683e-01     | 1.732         | 7.534e-01      | 0.91             | 6.324e-01         | 2.300             |              |                   |                  |
| [ 0.00968,0.013)          | 27              | 25            | 92.59         | 1.156     | 6.006e-01     | 2.227         | 6.636e-01      | 0.84             | 6.708e-01         | 1.361             |              |                   |                  |
| ≥ 0.013                   | 28              | 21            | 75.00         | 1.888     | 1.004         | 3.548         | 4.839e-02      | 0.61             | 3.258e-01         | 2.086             |              |                   |                  |
| <b>Quartiles</b>          |                 |               |               |           |               |               |                |                  |                   |                   |              |                   |                  |
| < 0.0056                  | 32              | 21            | 65.62         | ----      | ----          | ----          | ----           | 1.40             | 1.054             | 2.491             | 2.51e-03     | 1.64e-03          | 3.28e-04         |
| [ 0.0056,0.0087)          | 31              | 24            | 77.42         | 2.342     | 1.355         | 4.049         | 2.315e-03      | 1.92             | 1.029             | 3.261             |              |                   |                  |
| [ 0.0087,0.011)           | 29              | 24            | 82.76         | 9.761e-01 | 5.423e-01     | 1.757         | 9.356e-01      | 0.72             | 5.010e-01         | 2.275             |              |                   |                  |
| ≥ 0.011                   | 43              | 35            | 81.40         | 1.664     | 9.223e-01     | 3.002         | 9.079e-02      | 0.84             | 3.587e-01         | 1.087             |              |                   |                  |
| <b>Tertiles</b>           |                 |               |               |           |               |               |                |                  |                   |                   |              |                   |                  |
| < 0.0066                  | 41              | 28            | 68.29         | ----      | ----          | ----          | ----           | 1.57             | 1.112             | 2.431             | 3.95e-03     | 2.38e-03          | 7.25e-04         |
| [ 0.0066,0.00997)         | 48              | 38            | 79.17         | 1.209     | 7.382e-01     | 1.979         | 4.512e-01      | 0.95             | 7.502e-01         | 2.111             |              |                   |                  |
| ≥ 0.00997                 | 46              | 38            | 82.61         | 2.233     | 1.361         | 3.665         | 1.477e-03      | 0.84             | 5.284e-01         | 1.112             |              |                   |                  |
| <b>Profile Likelihood</b> |                 |               |               |           |               |               |                |                  |                   |                   |              |                   |                  |
| < 0.0092                  | 74              | 53            | 71.62         | ----      | ----          | ----          | ----           | 1.40             | 1.112             | 2.231             | 2.27e-04     | 1.45e-04          | 5.32e-05         |
| ≥ 0.0092                  | 61              | 51            | 83.61         | 2.119     | 1.427         | 3.147         | 1.988e-04      | 0.79             | 6.133e-01         | 9.774e-01         |              |                   |                  |
| <b>Quantitative*</b>      |                 |               |               |           |               |               |                |                  |                   |                   |              |                   |                  |
|                           | 135             | 104           | 77.04         | 1.001     | 0.9874        | 1.015         | 8.875e-01      |                  |                   |                   | 8.888e-01    | 8.874e-01         |                  |

\*Units of pg / mL were used in **Quantitative model only**.

**Cohort: Derivation**  
**Outcome: Progression Free Survival by FVC ( Lung Transplant is Censored )**  
**Predictor: VCAM1 ( ng / mL )**

|                           | Patients<br>(N) | Events<br>(n) | Events<br>(%) | HR        | HR<br>95% LCL | HR<br>95% UCL | Wald<br>pvalue | Median<br>(yrs.) | Median<br>95% LCL | Median<br>95% UCL | LR<br>pvalue | Logrank<br>pvalue | DevLIN<br>pvalue |
|---------------------------|-----------------|---------------|---------------|-----------|---------------|---------------|----------------|------------------|-------------------|-------------------|--------------|-------------------|------------------|
| <b>Quintiles</b>          |                 |               |               |           |               |               |                |                  |                   |                   |              |                   |                  |
| < 335                     | 26              | 18            | 69.23         | ----      | ----          | ----          | ----           | 1.31             | 9.582e-01         | 2.431             | 8.74e-03     | 1.32e-02          | 5.81e-02         |
| [ 335,402)                | 27              | 18            | 66.67         | 5.672e-01 | 2.904e-01     | 1.108         | 9.688e-02      | 2.08             | 1.402             |                   |              |                   |                  |
| [ 402,457)                | 29              | 23            | 79.31         | 1.497     | 8.044e-01     | 2.785         | 2.030e-01      | 0.75             | 4.983e-01         | 1.572             |              |                   |                  |
| [ 457,572)                | 28              | 21            | 75.00         | 1.312     | 6.966e-01     | 2.472         | 4.002e-01      | 0.82             | 5.749e-01         | 2.086             |              |                   |                  |
| ≥ 572                     | 25              | 24            | 96.00         | 1.503     | 8.146e-01     | 2.771         | 1.924e-01      | 0.94             | 5.284e-01         | 1.947             |              |                   |                  |
| <b>Quartiles</b>          |                 |               |               |           |               |               |                |                  |                   |                   |              |                   |                  |
| < 359                     | 34              | 23            | 67.65         | ----      | ----          | ----          | ----           | 1.33             | 9.582e-01         | 2.491             | 3.33e-02     | 3.05e-02          | 2.23e-01         |
| [ 359,419)                | 32              | 24            | 75.00         | 1.016     | 5.729e-01     | 1.803         | 9.560e-01      | 1.57             | 9.062e-01         | 2.530             |              |                   |                  |
| [ 419,518)                | 37              | 28            | 75.68         | 1.903     | 1.085         | 3.338         | 2.471e-02      | 0.78             | 4.873e-01         | 1.714             |              |                   |                  |
| ≥ 518                     | 32              | 29            | 90.62         | 1.729     | 9.969e-01     | 2.999         | 5.132e-02      | 0.94             | 5.284e-01         | 1.717             |              |                   |                  |
| <b>Tertiles</b>           |                 |               |               |           |               |               |                |                  |                   |                   |              |                   |                  |
| < 378                     | 46              | 30            | 65.22         | ----      | ----          | ----          | ----           | 1.34             | 9.582e-01         | 2.491             | 6.39e-02     | 7.02e-02          | 4.16e-01         |
| [ 378,480)                | 45              | 35            | 77.78         | 1.521     | 9.321e-01     | 2.483         | 9.319e-02      | 1.05             | 7.091e-01         | 2.012             |              |                   |                  |
| ≥ 480                     | 44              | 39            | 88.64         | 1.721     | 1.067         | 2.778         | 2.618e-02      | 0.86             | 6.708e-01         | 1.714             |              |                   |                  |
| <b>Profile Likelihood</b> |                 |               |               |           |               |               |                |                  |                   |                   |              |                   |                  |
| < 399.5                   | 53              | 36            | 67.92         | ----      | ----          | ----          | ----           | 1.92             | 1.311             | 2.431             | 1.13e-03     | 1.30e-03          | 1.42e-02         |
| ≥ 399.5                   | 82              | 68            | 82.93         | 1.954     | 1.291         | 2.957         | 1.532e-03      | 0.84             | 6.708e-01         | 1.054             |              |                   |                  |
| <b>Quantitative</b>       |                 |               |               |           |               |               |                |                  |                   |                   |              |                   |                  |
|                           | 135             | 104           | 77.04         | 1.001     | 1.000         | 1.002         | 2.261e-02      |                  |                   |                   | 3.208e-02    | 2.213e-02         |                  |

**Cohort: Derivation**  
**Outcome: Progression Free Survival by FVC ( Lung Transplant is Censored )**  
**Predictor: S100A12 ( ng / mL )**

|                           | Patients<br>(N) | Events<br>(n) | Events<br>(%) | HR    | HR<br>95% LCL | HR<br>95% UCL | Wald<br>pvalue | Median<br>(yrs.) | Median<br>95% LCL | Median<br>95% UCL | LR<br>pvalue | Logrank<br>pvalue | DevLIN<br>pvalue |
|---------------------------|-----------------|---------------|---------------|-------|---------------|---------------|----------------|------------------|-------------------|-------------------|--------------|-------------------|------------------|
| <b>Quintiles</b>          |                 |               |               |       |               |               |                |                  |                   |                   |              |                   |                  |
| < 15                      | 26              | 18            | 69.23         | ----  | ----          | ----          | ----           | 2.01             | 1.342             | 3.274             | 2.10e-03     | 8.05e-04          | 1.58e-03         |
| [ 15,21.6)                | 29              | 21            | 72.41         | 2.012 | 1.056         | 3.830         | 3.340e-02      | 0.98             | 6.708e-01         | 2.034             |              |                   |                  |
| [ 21.6,29)                | 26              | 21            | 80.77         | 1.356 | 7.208e-01     | 2.551         | 3.449e-01      | 1.33             | 9.062e-01         | 2.606             |              |                   |                  |
| [ 29,51)                  | 26              | 23            | 88.46         | 3.608 | 1.906         | 6.829         | 8.065e-05      | 0.74             | 4.079e-01         | 1.054             |              |                   |                  |
| ≥ 51                      | 28              | 21            | 75.00         | 1.706 | 9.073e-01     | 3.210         | 9.731e-02      | 0.94             | 3.614e-01         | 2.606             |              |                   |                  |
| <b>Quartiles</b>          |                 |               |               |       |               |               |                |                  |                   |                   |              |                   |                  |
| < 17.8                    | 34              | 25            | 73.53         | ----  | ----          | ----          | ----           | 1.59             | 1.029             | 2.530             | 1.82e-01     | 1.79e-01          | 1.49e-01         |
| [ 17.8,25)                | 34              | 24            | 70.59         | 1.204 | 6.848e-01     | 2.115         | 5.195e-01      | 1.27             | 7.775e-01         | 2.431             |              |                   |                  |
| [ 25,45.2)                | 34              | 30            | 88.24         | 1.748 | 1.025         | 2.979         | 4.017e-02      | 0.79             | 6.324e-01         | 1.311             |              |                   |                  |
| ≥ 45.2                    | 33              | 25            | 75.76         | 1.503 | 8.621e-01     | 2.621         | 1.508e-01      | 0.94             | 3.614e-01         | 2.231             |              |                   |                  |
| <b>Tertiles</b>           |                 |               |               |       |               |               |                |                  |                   |                   |              |                   |                  |
| < 19                      | 39              | 28            | 71.79         | ----  | ----          | ----          | ----           | 1.36             | 9.500e-01         | 2.491             | 6.26e-02     | 5.46e-02          | 1.11e-02         |
| [ 19,37)                  | 51              | 39            | 76.47         | 1.194 | 7.335e-01     | 1.943         | 4.761e-01      | 1.25             | 7.775e-01         | 2.034             |              |                   |                  |
| ≥ 37                      | 45              | 37            | 82.22         | 1.775 | 1.084         | 2.905         | 2.261e-02      | 0.82             | 4.983e-01         | 1.087             |              |                   |                  |
| <b>Profile Likelihood</b> |                 |               |               |       |               |               |                |                  |                   |                   |              |                   |                  |
| < 31.5                    | 85              | 63            | 74.12         | ----  | ----          | ----          | ----           | 1.34             | 1.029             | 2.034             | 5.68e-03     | 4.09e-03          | 4.67e-04         |
| ≥ 31.5                    | 50              | 41            | 82.00         | 1.776 | 1.194         | 2.640         | 4.556e-03      | 0.79             | 3.614e-01         | 1.054             |              |                   |                  |
| <b>Quantitative</b>       | 135             | 104           | 77.04         | 1.001 | 9.966e-01     | 1.005         | 7.190e-01      |                  |                   |                   | 7.249e-01    | 7.189e-01         |                  |

**Cohort: Derivation**

**Outcome: Progression Free Survival by DLCO ( Lung Transplant is Censored )**

**Predictor: Age (years)**

|                           | Patients<br>(N) | Events<br>(n) | Events<br>(%) | HR        | HR<br>95% LCL | HR<br>95% UCL | Wald<br>pvalue | Median<br>(yrs.) | Median<br>95% LCL | Median<br>95% UCL | LR<br>pvalue | Logrank<br>pvalue | DevLIN<br>Pvalue |
|---------------------------|-----------------|---------------|---------------|-----------|---------------|---------------|----------------|------------------|-------------------|-------------------|--------------|-------------------|------------------|
| <b>Quintiles</b>          |                 |               |               |           |               |               |                |                  |                   |                   |              |                   |                  |
| < 59.5                    | 26              | 18            | 69.23         | ----      | ----          | ----          | ----           | 1.09             | 4.736e-01         |                   | 8.74e-01     | 8.76e-01          | 1.43e-01         |
| [ 59.5,66.1)              | 28              | 17            | 60.71         | 1.199     | 6.136e-01     | 2.342         | 5.957e-01      | 0.84             | 4.079e-01         | 2.242             |              |                   |                  |
| [ 66.1,69.7)              | 27              | 20            | 74.07         | 9.012e-01 | 4.717e-01     | 1.722         | 7.527e-01      | 1.11             | 8.624e-01         | 2.519             |              |                   |                  |
| [ 69.7,73.9)              | 26              | 24            | 92.31         | 1.196     | 6.447e-01     | 2.219         | 5.701e-01      | 0.91             | 8.049e-01         | 2.070             |              |                   |                  |
| ≥ 73.9                    | 28              | 25            | 89.29         | 1.135     | 6.160e-01     | 2.090         | 6.852e-01      | 1.14             | 6.407e-01         | 2.111             |              |                   |                  |
| <b>Quartiles</b>          |                 |               |               |           |               |               |                |                  |                   |                   |              |                   |                  |
| < 61.2                    | 33              | 22            | 66.67         | ----      | ----          | ----          | ----           | 1.09             | 4.736e-01         | 2.645             | 3.36e-01     | 3.47e-01          | 1.33e-01         |
| [ 61.2,68.5)              | 34              | 25            | 73.53         | 1.215     | 6.818e-01     | 2.167         | 5.082e-01      | 0.86             | 7.173e-01         | 1.821             |              |                   |                  |
| [ 68.5,73.3)              | 35              | 27            | 77.14         | 7.816e-01 | 4.421e-01     | 1.382         | 3.966e-01      | 1.70             | 9.500e-01         | 2.519             |              |                   |                  |
| ≥ 73.3                    | 33              | 30            | 90.91         | 1.189     | 6.831e-01     | 2.070         | 5.403e-01      | 0.90             | 6.626e-01         | 1.396             |              |                   |                  |
| <b>Tertiles</b>           |                 |               |               |           |               |               |                |                  |                   |                   |              |                   |                  |
| < 64.7                    | 45              | 31            | 68.89         | ----      | ----          | ----          | ----           | 0.84             | 4.791e-01         | 1.947             | 2.46e-01     | 2.48e-01          | 2.25e-02         |
| [ 64.7,71.3)              | 45              | 31            | 68.89         | 7.817e-01 | 4.725e-01     | 1.293         | 3.376e-01      | 1.11             | 9.500e-01         | 2.491             |              |                   |                  |
| ≥ 71.3                    | 45              | 42            | 93.33         | 1.164     | 7.296e-01     | 1.856         | 5.245e-01      | 0.86             | 7.091e-01         | 1.396             |              |                   |                  |
| <b>Profile Likelihood</b> |                 |               |               |           |               |               |                |                  |                   |                   |              |                   |                  |
| <71.3                     | 90              | 62            | 68.89         | ----      | ----          | ----          | ----           | 1.03             | 8.624e-01         | 1.947             | 1.69e-01     | 1.63e-01          | 1.41e-02         |
| ≥71.3                     | 45              | 42            | 93.33         | 1.323     | 8.909e-01     | 1.966         | 1.652e-01      | 0.86             | 7.091e-01         | 1.396             |              |                   |                  |
| <b>Quantitative</b>       |                 |               |               |           |               |               |                |                  |                   |                   |              |                   |                  |
|                           | 135             | 104           | 77.04         | 9.960e-01 | 9.696e-01     | 1.023         | 7.672e-01      |                  |                   |                   | 7.675e-01    | 7.672e-01         |                  |

**Predictor: Gender**

|        |    |    |       |      |       |       |          |      |       |      |          |          |  |
|--------|----|----|-------|------|-------|-------|----------|------|-------|------|----------|----------|--|
| Female | 36 | 29 | 80.56 | ---- | ----  | ----  | ----     | 1.24 | 0.862 | 2.13 |          |          |  |
| Male   | 99 | 75 | 75.76 | 1.11 | 0.721 | 1.705 | 6.38E-01 | 0.91 | 0.794 | 1.40 | 6.36E-01 | 6.38E-01 |  |

**Cohort: Derivation**  
**Outcome: Progression Free Survival by DLCO ( Lung Transplant is Censored )**  
**Predictor: Baseline (4-month) FVC % Predicted**

|                           | Patients<br>(N) | Events<br>(n) | Events<br>(%) | HR        | HR<br>95% LCL | HR<br>95% UCL | Wald<br>pvalue | Median<br>(yrs.) | Median<br>95% LCL | Median<br>95% UCL | LR<br>pvalue | Logrank<br>pvalue | DevLIN<br>pvalue |
|---------------------------|-----------------|---------------|---------------|-----------|---------------|---------------|----------------|------------------|-------------------|-------------------|--------------|-------------------|------------------|
| <b>Quintiles</b>          |                 |               |               |           |               |               |                |                  |                   |                   |              |                   |                  |
| < 43.3                    | 24              | 17            | 70.83         | ----      | ----          | ----          | ----           | 0.79             | 4.025e-01         | 2.300             | 2.86e-03     | 5.47e-03          | 1.47e-01         |
| [ 43.3,56.6)              | 24              | 16            | 66.67         | 8.278e-01 | 4.158e-01     | 1.648         | 5.905e-01      | 0.84             | 5.558e-01         |                   |              |                   |                  |
| [ 56.6,66)                | 23              | 20            | 86.96         | 8.510e-01 | 4.450e-01     | 1.627         | 6.256e-01      | 0.84             | 7.091e-01         | 1.582             |              |                   |                  |
| [ 66,77)                  | 22              | 18            | 81.82         | 7.571e-01 | 3.886e-01     | 1.475         | 4.135e-01      | 1.33             | 9.774e-01         | 1.947             |              |                   |                  |
| ≥ 77                      | 25              | 18            | 72.00         | 2.969e-01 | 1.456e-01     | 6.057e-01     | 8.428e-04      | 2.06             | 1.112             |                   |              |                   |                  |
| <b>Quartiles</b>          |                 |               |               |           |               |               |                |                  |                   |                   |              |                   |                  |
| < 47.8                    | 30              | 21            | 70.00         | ----      | ----          | ----          | ----           | 0.78             | 3.587e-01         | 2.127             | 2.00e-03     | 3.11e-03          | 1.58e-01         |
| [ 47.8,61.1)              | 30              | 22            | 73.33         | 8.229e-01 | 4.505e-01     | 1.503         | 5.261e-01      | 0.90             | 5.941e-01         | 1.235             |              |                   |                  |
| [ 61.1,74)                | 28              | 24            | 85.71         | 8.321e-01 | 4.621e-01     | 1.498         | 5.402e-01      | 1.25             | 7.173e-01         | 1.744             |              |                   |                  |
| ≥ 74                      | 30              | 22            | 73.33         | 3.414e-01 | 1.808e-01     | 6.447e-01     | 9.218e-04      | 1.82             | 1.112             |                   |              |                   |                  |
| <b>Tertiles</b>           |                 |               |               |           |               |               |                |                  |                   |                   |              |                   |                  |
| < 52.8                    | 40              | 27            | 67.50         | ----      | ----          | ----          | ----           | 0.79             | 5.010e-01         | 1.703             | 1.56e-03     | 1.68e-03          | 1.92e-01         |
| [ 52.8,69.9)              | 40              | 33            | 82.50         | 7.860e-01 | 4.714e-01     | 1.311         | 3.559e-01      | 0.91             | 7.091e-01         | 1.396             |              |                   |                  |
| ≥ 69.9                    | 38              | 29            | 76.32         | 3.868e-01 | 2.218e-01     | 6.744e-01     | 8.135e-04      | 1.47             | 1.144             | 3.031             |              |                   |                  |
| <b>Profile Likelihood</b> |                 |               |               |           |               |               |                |                  |                   |                   |              |                   |                  |
| < 76.9                    | 93              | 71            | 76.34         | ----      | ----          | ----          | ----           | 0.86             | 7.775e-01         | 1.246             | 8.49e-05     | 2.07e-04          | 1.44e-02         |
| ≥ 76.9                    | 25              | 18            | 72.00         | 3.497e-01 | 1.965e-01     | 6.224e-01     | 3.539e-04      | 2.06             | 1.112             |                   |              |                   |                  |
| <b>Quantitative</b>       | 118             | 89            | 75.42         | 9.828e-01 | 9.720e-01     | 9.938e-01     | 2.218e-03      |                  |                   |                   | 1.917e-03    | 2.183e-03         |                  |

Cohort: **Derivation**

Outcome: **Progression Free Survival by DLCO ( Lung Transplant is Censored )**

Predictor: **Baseline (4-month) DLco % Predicted**

|                           | Patients<br>(N) | Events<br>(n) | Events<br>(%) | HR        | HR<br>95% LCL | HR<br>95% UCL | Wald<br>pvalue | Median<br>(yrs.) | Median<br>95% LCL | Median<br>95% UCL | LR<br>pvalue | Logrank<br>pvalue | DevLIN<br>pvalue |
|---------------------------|-----------------|---------------|---------------|-----------|---------------|---------------|----------------|------------------|-------------------|-------------------|--------------|-------------------|------------------|
| <b>Quintiles</b>          |                 |               |               |           |               |               |                |                  |                   |                   |              |                   |                  |
| < 28.9                    | 21              | 16            | 76.19         | ----      | ----          | ----          | ----           | 0.90             | 4.025e-01         | 1.446             | 1.20e-02     | 8.13e-03          | 7.23e-01         |
| [ 28.9,39)                | 22              | 15            | 68.18         | 6.568e-01 | 3.224e-01     | 1.338         | 2.469e-01      | 0.99             | 7.775e-01         |                   |              |                   |                  |
| [ 39,49.4)                | 21              | 18            | 85.71         | 5.813e-01 | 2.938e-01     | 1.150         | 1.191e-01      | 0.86             | 5.941e-01         | 2.034             |              |                   |                  |
| [ 49.4,60)                | 20              | 16            | 80.00         | 3.876e-01 | 1.902e-01     | 7.901e-01     | 9.090e-03      | 1.33             | 9.774e-01         |                   |              |                   |                  |
| ≥ 60                      | 22              | 17            | 77.27         | 2.928e-01 | 1.408e-01     | 6.087e-01     | 1.004e-03      | 1.74             | 1.035             |                   |              |                   |                  |
| <b>Quartiles</b>          |                 |               |               |           |               |               |                |                  |                   |                   |              |                   |                  |
| < 31.6                    | 26              | 21            | 80.77         | ----      | ----          | ----          | ----           | 0.90             | 7.775e-01         | 1.402             | 4.50e-03     | 3.19e-03          | 5.26e-01         |
| [ 31.6,43.8)              | 27              | 19            | 70.37         | 9.847e-01 | 5.273e-01     | 1.839         | 9.614e-01      | 0.64             | 5.010e-01         | 1.087             |              |                   |                  |
| [ 43.8,57)                | 25              | 21            | 84.00         | 4.935e-01 | 2.669e-01     | 9.124e-01     | 2.430e-02      | 1.70             | 9.774e-01         | 2.519             |              |                   |                  |
| ≥ 57                      | 28              | 21            | 75.00         | 3.853e-01 | 2.041e-01     | 7.273e-01     | 3.259e-03      | 1.74             | 1.112             | 4.153             |              |                   |                  |
| <b>Tertiles</b>           |                 |               |               |           |               |               |                |                  |                   |                   |              |                   |                  |
| < 36.6                    | 35              | 25            | 71.43         | ----      | ----          | ----          | ----           | 0.90             | 7.775e-01         | 1.402             | 1.34e-02     | 1.10e-02          | 9.46e-01         |
| [ 36.6,53.4)              | 37              | 31            | 83.78         | 6.552e-01 | 3.855e-01     | 1.113         | 1.180e-01      | 0.98             | 7.091e-01         | 1.703             |              |                   |                  |
| ≥ 53.4                    | 34              | 26            | 76.47         | 4.236e-01 | 2.391e-01     | 7.506e-01     | 3.251e-03      | 1.74             | 1.035             | 2.850             |              |                   |                  |
| <b>Profile Likelihood</b> |                 |               |               |           |               |               |                |                  |                   |                   |              |                   |                  |
| <41.0                     | 51              | 39            | 76.47         | ----      | ----          | ----          | ----           | 0.84             | 5.941e-01         | 1.087             | 7.47e-05     | 3.47e-05          | 2.92e-02         |
| ≥41.0                     | 55              | 43            | 78.18         | 3.897e-01 | 2.459e-01     | 6.175e-01     | 6.015e-05      | 1.70             | 1.144             | 2.341             |              |                   |                  |
| <b>Quantitative</b>       |                 |               |               |           |               |               |                |                  |                   |                   |              |                   |                  |
|                           | 106             | 82            | 77.36         | 9.770e-01 | 9.636e-01     | 9.906e-01     | 9.591e-04      |                  |                   |                   | 9.372e-04    | 8.841e-04         |                  |

**Cohort: Derivation**  
**Outcome: Progression Free Survival by DLCO ( Lung Transplant is Censored )**  
**Predictor: Baseline (4-month) CPI**

|                           | Patients<br>(N) | Events<br>(n) | Events<br>(%) | HR    | HR<br>95% LCL | HR<br>95% UCL | Wald<br>pvalue | Median<br>(yrs.) | Median<br>95% LCL | Median<br>95% UCL | LR<br>pvalue | Logrank<br>pvalue | DevLIN<br>pvalue |
|---------------------------|-----------------|---------------|---------------|-------|---------------|---------------|----------------|------------------|-------------------|-------------------|--------------|-------------------|------------------|
| <b>Quintiles</b>          |                 |               |               |       |               |               |                |                  |                   |                   |              |                   |                  |
| < 43                      | 22              | 16            | 72.73         | ----  | ----          | ----          | ----           | 1.74             | 1.112             |                   | 2.00e-03     | 1.22e-03          | 4.41e-01         |
| [ 43,50.8)                | 20              | 17            | 85.00         | 1.305 | 6.503e-01     | 2.618         | 4.538e-01      | 1.95             | 9.774e-01         | 3.261             |              |                   |                  |
| [ 50.8,58.7)              | 21              | 17            | 80.95         | 2.123 | 1.039         | 4.340         | 3.901e-02      | 1.23             | 8.405e-01         | 2.341             |              |                   |                  |
| [ 58.7,64.5)              | 22              | 15            | 68.18         | 3.113 | 1.484         | 6.530         | 2.652e-03      | 0.67             | 5.558e-01         | 1.582             |              |                   |                  |
| ≥ 64.5                    | 21              | 17            | 80.95         | 3.497 | 1.712         | 7.144         | 5.915e-04      | 0.84             | 3.313e-01         | 1.714             |              |                   |                  |
| <b>Quartiles</b>          |                 |               |               |       |               |               |                |                  |                   |                   |              |                   |                  |
| < 44.4                    | 25              | 19            | 76.00         | ----  | ----          | ----          | ----           | 1.74             | 1.112             |                   | 2.42e-03     | 1.32e-03          | 7.43e-01         |
| [ 44.4,56)                | 27              | 22            | 81.48         | 1.314 | 7.030e-01     | 2.455         | 3.924e-01      | 1.25             | 8.624e-01         | 2.850             |              |                   |                  |
| [ 56,62.7)                | 27              | 22            | 81.48         | 2.280 | 1.199         | 4.337         | 1.197e-02      | 0.95             | 6.708e-01         | 1.582             |              |                   |                  |
| ≥ 62.7                    | 27              | 19            | 70.37         | 3.233 | 1.664         | 6.281         | 5.336e-04      | 0.82             | 3.313e-01         | 1.265             |              |                   |                  |
| <b>Tertiles</b>           |                 |               |               |       |               |               |                |                  |                   |                   |              |                   |                  |
| < 47.7                    | 34              | 26            | 76.47         | ----  | ----          | ----          | ----           | 1.74             | 1.087             | 2.645             | 7.18e-04     | 3.37e-04          | 4.73e-01         |
| [ 47.7,59.8)              | 37              | 30            | 81.08         | 1.628 | 9.417e-01     | 2.816         | 8.096e-02      | 1.23             | 8.405e-01         | 1.821             |              |                   |                  |
| ≥ 59.8                    | 35              | 26            | 74.29         | 3.117 | 1.744         | 5.572         | 1.250e-04      | 0.82             | 5.558e-01         | 1.123             |              |                   |                  |
| <b>Profile Likelihood</b> |                 |               |               |       |               |               |                |                  |                   |                   |              |                   |                  |
| <56.2                     | 55              | 43            | 78.18         | ----  | ----          | ----          | ----           | 1.47             | 1.144             | 2.341             | 6.55e-05     | 2.95e-05          | 6.97e-02         |
| ≥56.2                     | 51              | 39            | 76.47         | 2.585 | 1.632         | 4.095         | 5.208e-05      | 0.82             | 5.941e-01         | 9.774e-01         |              |                   |                  |
| <b>Quantitative</b>       |                 |               |               |       |               |               |                |                  |                   |                   |              |                   |                  |
|                           | 106             | 82            | 77.36         | 1.035 | 1.016         | 1.054         | 2.624e-04      |                  |                   |                   | 2.541e-04    | 2.599e-04         |                  |



Cohort: **Derivation**

Outcome: **Progression Free Survival by DLCO ( Lung Transplant is Censored )**

Predictor: **Baseline (3-month) FVC % Predicted**

|                           | Patients<br>(N) | Events<br>(n) | Events<br>(%) | HR        | HR<br>95% LCL | HR<br>95% UCL | Wald<br>pvalue | Median<br>(yrs.) | Median<br>95% LCL | Median<br>95% UCL | LR<br>pvalue | Logrank<br>pvalue | DevLIN<br>pvalue |
|---------------------------|-----------------|---------------|---------------|-----------|---------------|---------------|----------------|------------------|-------------------|-------------------|--------------|-------------------|------------------|
| <b>Quintiles</b>          |                 |               |               |           |               |               |                |                  |                   |                   |              |                   |                  |
| < 43.1                    | 22              | 15            | 68.18         | ----      | ----          | ----          | ----           | 0.67             | 3.313e-01         |                   | 4.55e-03     | 8.65e-03          | 2.56e-01         |
| [ 43.1,56.5)              | 21              | 13            | 61.90         | 1.015     | 4.748e-01     | 2.168         | 9.703e-01      | 0.84             | 4.873e-01         |                   |              |                   |                  |
| [ 56.5,65.7)              | 22              | 19            | 86.36         | 8.772e-01 | 4.447e-01     | 1.730         | 7.054e-01      | 0.86             | 6.626e-01         | 2.242             |              |                   |                  |
| [ 65.7,76.7)              | 19              | 16            | 84.21         | 8.265e-01 | 4.067e-01     | 1.680         | 5.984e-01      | 1.33             | 9.774e-01         | 1.947             |              |                   |                  |
| ≥ 76.7                    | 22              | 15            | 68.18         | 3.072e-01 | 1.437e-01     | 6.567e-01     | 2.326e-03      | 2.06             | 1.144             |                   |              |                   |                  |
| <b>Quartiles</b>          |                 |               |               |           |               |               |                |                  |                   |                   |              |                   |                  |
| < 47.8                    | 27              | 18            | 66.67         | ----      | ----          | ----          | ----           | 0.67             | 3.313e-01         | 2.300             | 3.08e-03     | 4.78e-03          | 2.48e-01         |
| [ 47.8,60.5)              | 27              | 19            | 70.37         | 8.213e-01 | 4.286e-01     | 1.574         | 5.529e-01      | 0.90             | 5.558e-01         | 1.582             |              |                   |                  |
| [ 60.5,73.4)              | 27              | 23            | 85.19         | 8.118e-01 | 4.368e-01     | 1.509         | 5.096e-01      | 0.98             | 7.091e-01         | 1.744             |              |                   |                  |
| ≥ 73.4                    | 25              | 18            | 72.00         | 3.231e-01 | 1.620e-01     | 6.447e-01     | 1.347e-03      | 1.95             | 1.144             |                   |              |                   |                  |
| <b>Tertiles</b>           |                 |               |               |           |               |               |                |                  |                   |                   |              |                   |                  |
| < 52.4                    | 36              | 23            | 63.89         | ----      | ----          | ----          | ----           | 0.84             | 5.010e-01         | 1.714             | 3.70e-03     | 4.03e-03          | 4.00e-01         |
| [ 52.4,69.6)              | 36              | 29            | 80.56         | 8.344e-01 | 4.814e-01     | 1.446         | 5.189e-01      | 0.86             | 6.407e-01         | 1.265             |              |                   |                  |
| ≥ 69.6                    | 34              | 26            | 76.47         | 4.010e-01 | 2.220e-01     | 7.242e-01     | 2.447e-03      | 1.47             | 1.246             | 3.031             |              |                   |                  |
| <b>Profile Likelihood</b> |                 |               |               |           |               |               |                |                  |                   |                   |              |                   |                  |
| < 76.7                    | 84              | 63            | 75.00         | ----      | ----          | ----          | ----           | 0.90             | 7.091e-01         | 1.246             | 1.31e-04     | 3.10e-04          | 2.27e-02         |
| ≥ 76.7                    | 22              | 15            | 68.18         | 3.353e-01 | 1.807e-01     | 6.222e-01     | 5.302e-04      | 2.06             | 1.144             |                   |              |                   |                  |
| <b>Quantitative</b>       | 106             | 78            | 73.58         | 9.819e-01 | 9.706e-01     | 9.934e-01     | 2.023e-03      |                  |                   |                   | 1.773e-03    | 1.992e-03         |                  |

Cohort: **Derivation**

Outcome: **Progression Free Survival by DLCO ( Lung Transplant is Censored )**

Predictor: **Baseline (3-month) DLco % Predicted**

|                           | Patients<br>(N) | Events<br>(n) | Events<br>(%) | HR        | HR<br>95% LCL | HR<br>95% UCL | Wald<br>pvalue | Median<br>(yrs.) | Median<br>95% LCL | Median<br>95% UCL | LR<br>pvalue | Logrank<br>pvalue | DevLIN<br>pvalue |
|---------------------------|-----------------|---------------|---------------|-----------|---------------|---------------|----------------|------------------|-------------------|-------------------|--------------|-------------------|------------------|
| <b>Quintiles</b>          |                 |               |               |           |               |               |                |                  |                   |                   |              |                   |                  |
| < 28.6                    | 18              | 13            | 72.22         | ----      | ----          | ----          | ----           | 0.91             | 2.300e-01         |                   | 2.82e-02     | 2.61e-02          | 9.31e-01         |
| [ 28.6,38)                | 18              | 12            | 66.67         | 7.564e-01 | 3.411e-01     | 1.677         | 4.919e-01      | 0.78             | 3.313e-01         |                   |              |                   |                  |
| [ 38,49.9)                | 20              | 17            | 85.00         | 6.042e-01 | 2.916e-01     | 1.252         | 1.753e-01      | 0.86             | 6.708e-01         | 1.821             |              |                   |                  |
| [ 49.9,61)                | 18              | 15            | 83.33         | 5.134e-01 | 2.426e-01     | 1.087         | 8.134e-02      | 1.25             | 9.774e-01         | 2.645             |              |                   |                  |
| ≥ 61                      | 20              | 15            | 75.00         | 2.943e-01 | 1.333e-01     | 6.496e-01     | 2.461e-03      | 2.06             | 8.433e-01         |                   |              |                   |                  |
| <b>Quartiles</b>          |                 |               |               |           |               |               |                |                  |                   |                   |              |                   |                  |
| < 31.4                    | 23              | 18            | 78.26         | ----      | ----          | ----          | ----           | 0.91             | 4.353e-01         | 1.446             | 5.00e-03     | 5.36e-03          | 4.19e-01         |
| [ 31.4,41.3)              | 24              | 17            | 70.83         | 1.009     | 5.174e-01     | 1.968         | 9.789e-01      | 0.71             | 5.010e-01         | 1.087             |              |                   |                  |
| [ 41.3,57.2)              | 23              | 20            | 86.96         | 6.413e-01 | 3.385e-01     | 1.215         | 1.730e-01      | 1.25             | 8.049e-01         | 1.947             |              |                   |                  |
| ≥ 57.2                    | 24              | 17            | 70.83         | 3.425e-01 | 1.704e-01     | 6.883e-01     | 2.622e-03      | 2.07             | 1.035             |                   |              |                   |                  |
| <b>Tertiles</b>           |                 |               |               |           |               |               |                |                  |                   |                   |              |                   |                  |
| < 34.5                    | 31              | 22            | 70.97         | ----      | ----          | ----          | ----           | 0.91             | 4.025e-01         | 1.446             | 1.79e-02     | 1.73e-02          | 7.81e-01         |
| [ 34.5,54.3)              | 32              | 26            | 81.25         | 7.529e-01 | 4.259e-01     | 1.331         | 3.288e-01      | 0.98             | 7.091e-01         | 1.703             |              |                   |                  |
| ≥ 54.3                    | 31              | 24            | 77.42         | 4.311e-01 | 2.364e-01     | 7.864e-01     | 6.077e-03      | 1.47             | 8.433e-01         | 2.645             |              |                   |                  |
| <b>Profile Likelihood</b> |                 |               |               |           |               |               |                |                  |                   |                   |              |                   |                  |
| <41.0                     | 46              | 35            | 76.09         | ----      | ----          | ----          | ----           | 0.84             | 5.558e-01         | 1.087             | 1.74e-04     | 8.68e-05          | 4.37e-02         |
| ≥41.0                     | 48              | 37            | 77.08         | 3.898e-01 | 2.398e-01     | 6.336e-01     | 1.443e-04      | 1.70             | 1.144             | 2.242             |              |                   |                  |
| <b>Quantitative</b>       | 94              | 72            | 76.60         | 9.774e-01 | 9.637e-01     | 9.913e-01     | 1.530e-03      |                  |                   |                   | 1.539e-03    | 1.374e-03         |                  |

**Cohort: Derivation**  
**Outcome: Progression Free Survival by DLCO ( Lung Transplant is Censored )**  
**Predictor: Baseline (3-month) CPI**

|                           | Patients<br>(N) | Events<br>(n) | Events<br>(%) | HR    | HR<br>95% LCL | HR<br>95% UCL | Wald<br>pvalue | Median<br>(yrs.) | Median<br>95% LCL | Median<br>95% UCL | LR<br>pvalue | Logrank<br>pvalue | DevLIN<br>pvalue |
|---------------------------|-----------------|---------------|---------------|-------|---------------|---------------|----------------|------------------|-------------------|-------------------|--------------|-------------------|------------------|
| <b>Quintiles</b>          |                 |               |               |       |               |               |                |                  |                   |                   |              |                   |                  |
| < 42.8                    | 19              | 13            | 68.42         | ----  | ----          | ----          | ----           | 2.06             | 1.333             |                   | 5.32e-03     | 5.12e-03          | 6.66e-01         |
| [ 42.8,51.5)              | 18              | 16            | 88.89         | 1.686 | 7.941e-01     | 3.578         | 1.739e-01      | 1.14             | 9.774e-01         | 2.645             |              |                   |                  |
| [ 51.5,59)                | 19              | 15            | 78.95         | 2.536 | 1.156         | 5.560         | 2.019e-02      | 0.99             | 8.405e-01         |                   |              |                   |                  |
| [ 59,65.1)                | 19              | 13            | 68.42         | 3.454 | 1.536         | 7.769         | 2.722e-03      | 0.64             | 5.010e-01         |                   |              |                   |                  |
| ≥ 65.1                    | 19              | 15            | 78.95         | 3.565 | 1.636         | 7.770         | 1.385e-03      | 0.90             | 2.300e-01         | 2.127             |              |                   |                  |
| <b>Quartiles</b>          |                 |               |               |       |               |               |                |                  |                   |                   |              |                   |                  |
| < 44.3                    | 23              | 17            | 73.91         | ----  | ----          | ----          | ----           | 1.74             | 1.035             |                   | 1.64e-03     | 1.08e-03          | 4.08e-01         |
| [ 44.3,56.1)              | 24              | 19            | 79.17         | 1.440 | 7.382e-01     | 2.809         | 2.848e-01      | 1.34             | 9.774e-01         | 2.519             |              |                   |                  |
| [ 56.1,62.8)              | 24              | 20            | 83.33         | 3.023 | 1.524         | 5.996         | 1.542e-03      | 0.84             | 5.558e-01         | 1.402             |              |                   |                  |
| ≥ 62.8                    | 23              | 16            | 69.57         | 3.161 | 1.554         | 6.430         | 1.489e-03      | 0.90             | 3.313e-01         | 2.127             |              |                   |                  |
| <b>Tertiles</b>           |                 |               |               |       |               |               |                |                  |                   |                   |              |                   |                  |
| < 47.6                    | 31              | 23            | 74.19         | ----  | ----          | ----          | ----           | 1.74             | 1.087             | 2.645             | 1.41e-03     | 1.01e-03          | 5.80e-01         |
| [ 47.6,59.9)              | 32              | 27            | 84.38         | 1.909 | 1.072         | 3.398         | 2.797e-02      | 0.98             | 7.173e-01         | 1.703             |              |                   |                  |
| ≥ 59.9                    | 31              | 22            | 70.97         | 3.082 | 1.665         | 5.707         | 3.411e-04      | 0.78             | 4.025e-01         | 1.265             |              |                   |                  |
| <b>Profile Likelihood</b> |                 |               |               |       |               |               |                |                  |                   |                   |              |                   |                  |
| <56.2                     | 48              | 37            | 77.08         | ----  | ----          | ----          | ----           | 1.47             | 1.144             | 2.242             | 1.59e-04     | 7.78e-05          | 1.09e-01         |
| ≥56.2                     | 46              | 35            | 76.09         | 2.580 | 1.587         | 4.192         | 1.308e-04      | 0.78             | 5.558e-01         | 9.856e-01         |              |                   |                  |
| <b>Quantitative</b>       | 94              | 72            | 76.60         | 1.034 | 1.015         | 1.053         | 4.403e-04      |                  |                   |                   | 4.409e-04    | 4.152e-04         |                  |

**Cohort: Derivation**  
**Outcome: Progression Free Survival by DLCO ( Lung Transplant is Censored )**  
**Predictor: MMP7 ( ng / mL )**

|                           | Patients<br>(N) | Events<br>(n) | Events<br>(%) | HR        | HR<br>95% LCL | HR<br>95% UCL | Wald<br>pvalue | Median<br>(yrs.) | Median<br>95% LCL | Median<br>95% UCL | LR<br>pvalue | Logrank<br>pvalue | DevLIN<br>pvalue |
|---------------------------|-----------------|---------------|---------------|-----------|---------------|---------------|----------------|------------------|-------------------|-------------------|--------------|-------------------|------------------|
| <b>Quintiles</b>          |                 |               |               |           |               |               |                |                  |                   |                   |              |                   |                  |
| < 2.7                     | 26              | 20            | 76.92         | ----      | ----          | ----          | ----           | 1.33             | 4.873e-01         | 2.431             | 5.09e-01     | 5.06e-01          | 5.01e-01         |
| [ 2.7,3.76)               | 23              | 17            | 73.91         | 7.108e-01 | 3.707e-01     | 1.363         | 3.041e-01      | 1.47             | 8.433e-01         |                   |              |                   |                  |
| [ 3.76,4.99)              | 27              | 19            | 70.37         | 9.176e-01 | 4.823e-01     | 1.746         | 7.933e-01      | 0.84             | 6.708e-01         | 2.519             |              |                   |                  |
| [ 4.99,6.41)              | 26              | 22            | 84.62         | 1.267     | 6.908e-01     | 2.325         | 4.441e-01      | 0.98             | 3.751e-01         | 1.821             |              |                   |                  |
| ≥ 6.41                    | 26              | 21            | 80.77         | 9.917e-01 | 5.359e-01     | 1.835         | 9.787e-01      | 0.95             | 8.378e-01         | 2.127             |              |                   |                  |
| <b>Quartiles</b>          |                 |               |               |           |               |               |                |                  |                   |                   |              |                   |                  |
| < 2.92                    | 32              | 25            | 78.12         | ----      | ----          | ----          | ----           | 1.40             | 8.433e-01         | 2.431             | 4.19e-01     | 4.34e-01          | 5.69e-01         |
| [ 2.92,4.3)               | 30              | 21            | 70.00         | 7.793e-01 | 4.303e-01     | 1.411         | 4.107e-01      | 0.91             | 7.173e-01         |                   |              |                   |                  |
| [ 4.3,5.73)               | 33              | 25            | 75.76         | 1.203     | 6.898e-01     | 2.099         | 5.144e-01      | 0.86             | 5.284e-01         | 2.034             |              |                   |                  |
| ≥ 5.73                    | 33              | 28            | 84.85         | 1.190     | 6.923e-01     | 2.047         | 5.286e-01      | 0.98             | 8.378e-01         | 1.821             |              |                   |                  |
| <b>Tertiles</b>           |                 |               |               |           |               |               |                |                  |                   |                   |              |                   |                  |
| < 3.51                    | 43              | 31            | 72.09         | ----      | ----          | ----          | ----           | 1.47             | 8.433e-01         | 2.491             | 2.70e-01     | 2.80e-01          | 3.69e-01         |
| [ 3.51,5.35)              | 42              | 31            | 73.81         | 1.379     | 8.315e-01     | 2.288         | 2.130e-01      | 0.84             | 5.749e-01         | 1.265             |              |                   |                  |
| ≥ 5.35                    | 43              | 37            | 86.05         | 1.440     | 8.911e-01     | 2.326         | 1.366e-01      | 0.98             | 8.378e-01         | 1.821             |              |                   |                  |
| <b>Profile Likelihood</b> |                 |               |               |           |               |               |                |                  |                   |                   |              |                   |                  |
| < 4.0                     | 53              | 39            | 73.58         | ----      | ----          | ----          | ----           | 1.40             | 8.433e-01         | 2.431             | 4.68e-02     | 4.82e-02          | 5.53e-02         |
| ≥ 4.0                     | 75              | 60            | 80.00         | 1.506     | 1.001         | 2.267         | 4.948e-02      | 0.90             | 8.241e-01         | 1.265             |              |                   |                  |
| <b>Quantitative</b>       | 128             | 99            | 77.34         | 1.033     | 0.9643        | 1.106         | 3.583e-01      |                  |                   |                   | 3.667e-01    | 3.582e-01         |                  |

**Cohort: Derivation**  
**Outcome: Progression Free Survival by DLCO ( Lung Transplant is Censored )**  
**Predictor: ICAM1 ( ng / mL )**

|                           | Patients<br>(N) | Events<br>(n) | Events<br>(%) | HR        | HR<br>95% LCL | HR<br>95% UCL | Wald<br>pvalue | Median<br>(yrs.) | Median<br>95% LCL | Median<br>95% UCL | LR<br>pvalue | Logrank<br>pvalue | DevLIN<br>pvalue |
|---------------------------|-----------------|---------------|---------------|-----------|---------------|---------------|----------------|------------------|-------------------|-------------------|--------------|-------------------|------------------|
| <b>Quintiles</b>          |                 |               |               |           |               |               |                |                  |                   |                   |              |                   |                  |
| < 158                     | 27              | 23            | 85.19         | ----      | ----          | ----          | ----           | 1.14             | 7.173e-01         | 2.070             | 9.62e-01     | 9.61e-01          | 5.43e-01         |
| [ 158,205)                | 26              | 20            | 76.92         | 1.022     | 5.601e-01     | 1.864         | 9.441e-01      | 0.86             | 8.049e-01         | 2.300             |              |                   |                  |
| [ 205,252)                | 27              | 20            | 74.07         | 1.143     | 6.264e-01     | 2.084         | 6.639e-01      | 0.90             | 5.749e-01         | 2.491             |              |                   |                  |
| [ 252,351)                | 27              | 18            | 66.67         | 1.090     | 5.873e-01     | 2.024         | 7.845e-01      | 1.09             | 6.626e-01         | 2.034             |              |                   |                  |
| ≥ 351                     | 28              | 23            | 82.14         | 9.109e-01 | 5.029e-01     | 1.650         | 7.581e-01      | 0.98             | 7.775e-01         | 2.850             |              |                   |                  |
| <b>Quartiles</b>          |                 |               |               |           |               |               |                |                  |                   |                   |              |                   |                  |
| < 175                     | 32              | 27            | 84.38         | ----      | ----          | ----          | ----           | 1.14             | 7.173e-01         | 2.070             | 4.85e-01     | 4.66e-01          | 2.61e-01         |
| [ 175,230)                | 35              | 27            | 77.14         | 1.385     | 8.092e-01     | 2.370         | 2.350e-01      | 0.84             | 5.941e-01         | 1.821             |              |                   |                  |
| [ 230,318)                | 33              | 21            | 63.64         | 8.982e-01 | 5.072e-01     | 1.590         | 7.126e-01      | 1.12             | 9.062e-01         | 3.031             |              |                   |                  |
| ≥ 318                     | 35              | 29            | 82.86         | 1.030     | 6.035e-01     | 1.759         | 9.127e-01      | 0.98             | 7.775e-01         | 1.947             |              |                   |                  |
| <b>Tertiles</b>           |                 |               |               |           |               |               |                |                  |                   |                   |              |                   |                  |
| < 197                     | 46              | 38            | 82.61         | ----      | ----          | ----          | ----           | 1.14             | 8.433e-01         | 2.070             | 7.77e-01     | 7.70e-01          | 6.83e-01         |
| [ 197,274)                | 43              | 31            | 72.09         | 1.180     | 7.333e-01     | 1.898         | 4.956e-01      | 0.90             | 6.708e-01         | 2.341             |              |                   |                  |
| ≥ 274                     | 46              | 35            | 76.09         | 1.028     | 6.442e-01     | 1.640         | 9.084e-01      | 0.98             | 7.775e-01         | 1.714             |              |                   |                  |
| <b>Profile Likelihood</b> |                 |               |               |           |               |               |                |                  |                   |                   |              |                   |                  |
| <234.0                    | 70              | 57            | 81.43         | ----      | ----          | ----          | ----           | 0.86             | 7.940e-01         | 1.396             | 2.09e-01     | 2.11e-01          | 2.60e-02         |
| ≥234.0                    | 65              | 47            | 72.31         | 7.783e-01 | 5.254e-01     | 1.153         | 2.111e-01      | 1.25             | 8.378e-01         | 1.947             |              |                   |                  |
| <b>Quantitative</b>       | 135             | 104           | 77.04         | 1.000     | 9.988e-01     | 1.002         | 7.476e-01      |                  |                   |                   | 7.494e-01    | 7.476e-01         |                  |

Cohort: **Derivation**

Outcome: **Progression Free Survival by DLCO ( Lung Transplant is Censored )**

Predictor: **IL8 ( ng / mL )**

|                           | Patients<br>(N) | Events<br>(n) | Events<br>(%) | HR        | HR<br>95% LCL | HR<br>95% UCL | Wald<br>pvalue | Median<br>(yrs.) | Median<br>95% LCL | Median<br>95% UCL | LR<br>pvalue | Logrank<br>pvalue | DevLIN<br>pvalue |
|---------------------------|-----------------|---------------|---------------|-----------|---------------|---------------|----------------|------------------|-------------------|-------------------|--------------|-------------------|------------------|
| <b>Quintiles</b>          |                 |               |               |           |               |               |                |                  |                   |                   |              |                   |                  |
| < 0.0051                  | 25              | 18            | 72.00         | ----      | ----          | ----          | ----           | 1.40             | 8.433e-01         | 2.431             | 2.72e-02     | 1.94e-02          | 2.23e-01         |
| [ 0.0051,0.00776)         | 27              | 19            | 70.37         | 2.059     | 1.089         | 3.890         | 2.615e-02      | 1.28             | 8.405e-01         |                   |              |                   |                  |
| [ 0.00776,0.00968)        | 28              | 23            | 82.14         | 7.559e-01 | 3.921e-01     | 1.457         | 4.034e-01      | 0.91             | 7.940e-01         | 2.606             |              |                   |                  |
| [ 0.00968,0.013)          | 27              | 23            | 85.19         | 1.077     | 5.794e-01     | 2.003         | 8.137e-01      | 0.86             | 6.708e-01         | 1.714             |              |                   |                  |
| ≥ 0.013                   | 28              | 21            | 75.00         | 1.479     | 7.956e-01     | 2.749         | 2.161e-01      | 0.84             | 3.587e-01         | 1.342             |              |                   |                  |
| <b>Quartiles</b>          |                 |               |               |           |               |               |                |                  |                   |                   |              |                   |                  |
| < 0.0056                  | 32              | 23            | 71.88         | ----      | ----          | ----          | ----           | 1.40             | 8.405e-01         | 2.070             | 1.02e-03     | 9.72e-04          | 1.11e-02         |
| [ 0.0056,0.0087)          | 31              | 23            | 74.19         | 1.867     | 1.092         | 3.194         | 2.253e-02      | 2.03             | 9.856e-01         |                   |              |                   |                  |
| [ 0.0087,0.011)           | 29              | 24            | 82.76         | 6.270e-01 | 3.453e-01     | 1.139         | 1.251e-01      | 0.79             | 7.091e-01         | 2.300             |              |                   |                  |
| ≥ 0.011                   | 43              | 34            | 79.07         | 1.365     | 7.686e-01     | 2.426         | 2.881e-01      | 0.84             | 5.284e-01         | 1.123             |              |                   |                  |
| <b>Tertiles</b>           |                 |               |               |           |               |               |                |                  |                   |                   |              |                   |                  |
| < 0.0066                  | 41              | 29            | 70.73         | ----      | ----          | ----          | ----           | 1.40             | 8.433e-01         | 2.242             | 4.05e-03     | 2.18e-03          | 5.14e-02         |
| [ 0.0066,0.00997)         | 48              | 38            | 79.17         | 1.006     | 6.158e-01     | 1.644         | 9.803e-01      | 1.03             | 8.241e-01         | 2.519             |              |                   |                  |
| ≥ 0.00997                 | 46              | 37            | 80.43         | 2.090     | 1.271         | 3.435         | 3.653e-03      | 0.84             | 5.941e-01         | 1.123             |              |                   |                  |
| <b>Profile Likelihood</b> |                 |               |               |           |               |               |                |                  |                   |                   |              |                   |                  |
| < 0.0084                  | 60              | 43            | 71.67         | ----      | ----          | ----          | ----           | 1.40             | 1.035             | 2.242             | 2.94e-04     | 2.78e-04          | 4.14e-03         |
| ≥ 0.0084                  | 75              | 61            | 81.33         | 2.093     | 1.395         | 3.142         | 3.618e-04      | 0.84             | 6.708e-01         | 1.087             |              |                   |                  |
| <b>Quantitative*</b>      |                 |               |               |           |               |               |                |                  |                   |                   |              |                   |                  |
|                           | 135             | 104           | 77.04         | 1.026     | 1.009         | 1.043         | 2.346e-03      |                  |                   |                   | 1.480e-02    | 1.691e-03         |                  |

\*Units of pg / mL were used in **Quantitative model only**.

**Cohort: Derivation**  
**Outcome: Progression Free Survival by DLCO ( Lung Transplant is Censored )**  
**Predictor: VCAM1 ( ng / mL )**

|                           | Patients<br>(N) | Events<br>(n) | Events<br>(%) | HR        | HR<br>95% LCL | HR<br>95% UCL | Wald<br>pvalue | Median<br>(yrs.) | Median<br>95% LCL | Median<br>95% UCL | LR<br>pvalue | Logrank<br>pvalue | DevLIN<br>pvalue |
|---------------------------|-----------------|---------------|---------------|-----------|---------------|---------------|----------------|------------------|-------------------|-------------------|--------------|-------------------|------------------|
| <b>Quintiles</b>          |                 |               |               |           |               |               |                |                  |                   |                   |              |                   |                  |
| < 335                     | 26              | 17            | 65.38         | ----      | ----          | ----          | ----           | 1.33             | 9.856e-01         |                   | 4.35e-02     | 5.42e-02          | 1.75e-01         |
| [ 335,402)                | 27              | 20            | 74.07         | 6.627e-01 | 3.425e-01     | 1.282         | 2.218e-01      | 2.11             | 1.703             | 4.044             |              |                   |                  |
| [ 402,457)                | 29              | 23            | 79.31         | 1.393     | 7.390e-01     | 2.626         | 3.054e-01      | 0.71             | 4.791e-01         | 1.123             |              |                   |                  |
| [ 457,572)                | 28              | 21            | 75.00         | 1.476     | 7.729e-01     | 2.819         | 2.381e-01      | 0.78             | 4.408e-01         | 1.714             |              |                   |                  |
| ≥ 572                     | 25              | 23            | 92.00         | 1.410     | 7.479e-01     | 2.657         | 2.883e-01      | 0.95             | 5.941e-01         | 1.947             |              |                   |                  |
| <b>Quartiles</b>          |                 |               |               |           |               |               |                |                  |                   |                   |              |                   |                  |
| < 359                     | 34              | 25            | 73.53         | ----      | ----          | ----          | ----           | 1.40             | 9.856e-01         | 2.242             | 1.10e-02     | 1.26e-02          | 8.33e-02         |
| [ 359,419)                | 32              | 22            | 68.75         | 6.487e-01 | 3.610e-01     | 1.166         | 1.478e-01      | 2.03             | 9.062e-01         |                   |              |                   |                  |
| [ 419,518)                | 37              | 29            | 78.38         | 1.455     | 8.468e-01     | 2.499         | 1.746e-01      | 0.75             | 4.791e-01         | 1.123             |              |                   |                  |
| ≥ 518                     | 32              | 28            | 87.50         | 1.474     | 8.561e-01     | 2.539         | 1.616e-01      | 0.84             | 4.353e-01         | 1.473             |              |                   |                  |
| <b>Tertiles</b>           |                 |               |               |           |               |               |                |                  |                   |                   |              |                   |                  |
| < 378                     | 46              | 31            | 67.39         | ----      | ----          | ----          | ----           | 1.40             | 9.856e-01         | 2.431             | 1.86e-01     | 1.84e-01          | 9.01e-01         |
| [ 378,480)                | 45              | 35            | 77.78         | 1.257     | 7.704e-01     | 2.050         | 3.601e-01      | 0.84             | 6.626e-01         | 2.034             |              |                   |                  |
| ≥ 480                     | 44              | 38            | 86.36         | 1.560     | 9.682e-01     | 2.514         | 6.765e-02      | 0.86             | 5.941e-01         | 1.473             |              |                   |                  |
| <b>Profile Likelihood</b> |                 |               |               |           |               |               |                |                  |                   |                   |              |                   |                  |
| < 418.0                   | 66              | 47            | 71.21         | ----      | ----          | ----          | ----           | 1.40             | 9.856e-01         | 2.242             | 2.65e-03     | 2.40e-03          | 4.63e-02         |
| ≥ 418.0                   | 69              | 57            | 82.61         | 1.823     | 1.230         | 2.702         | 2.774e-03      | 0.82             | 4.873e-01         | 1.087             |              |                   |                  |
| <b>Quantitative</b>       | 135             | 104           | 77.04         | 1.001     | 1.000         | 1.002         | 1.457e-02      |                  |                   |                   | 2.299e-02    | 1.426e-02         |                  |

**Cohort: Derivation**  
**Outcome: Progression Free Survival by DLCO ( Lung Transplant is Censored )**  
**Predictor: S100A12 ( ng / mL )**

|                           | Patients<br>(N) | Events<br>(n) | Events<br>(%) | HR        | HR<br>95% LCL | HR<br>95% UCL | Wald<br>pvalue | Median<br>(yrs.) | Median<br>95% LCL | Median<br>95% UCL | LR<br>pvalue | Logrank<br>pvalue | DevLIN<br>pvalue |
|---------------------------|-----------------|---------------|---------------|-----------|---------------|---------------|----------------|------------------|-------------------|-------------------|--------------|-------------------|------------------|
| <b>Quintiles</b>          |                 |               |               |           |               |               |                |                  |                   |                   |              |                   |                  |
| < 15                      | 26              | 20            | 76.92         | ----      | ----          | ----          | ----           | 1.71             | 8.433e-01         | 2.519             | 1.68e-02     | 5.66e-03          | 1.45e-02         |
| [ 15,21.6)                | 29              | 21            | 72.41         | 1.290     | 6.958e-01     | 2.390         | 4.192e-01      | 0.98             | 8.624e-01         | 2.034             |              |                   |                  |
| [ 21.6,29)                | 26              | 19            | 73.08         | 1.000     | 5.311e-01     | 1.883         | 1.000          | 1.23             | 7.502e-01         | 3.031             |              |                   |                  |
| [ 29,51)                  | 26              | 23            | 88.46         | 2.682     | 1.449         | 4.965         | 1.683e-03      | 0.66             | 4.791e-01         | 9.008e-01         |              |                   |                  |
| ≥ 51                      | 28              | 21            | 75.00         | 1.193     | 6.414e-01     | 2.221         | 5.767e-01      | 1.40             | 8.378e-01         | 2.664             |              |                   |                  |
| <b>Quartiles</b>          |                 |               |               |           |               |               |                |                  |                   |                   |              |                   |                  |
| < 17.8                    | 34              | 27            | 79.41         | ----      | ----          | ----          | ----           | 1.11             | 8.624e-01         | 2.111             | 1.08e-01     | 9.52e-02          | 8.02e-02         |
| [ 17.8,25)                | 34              | 22            | 64.71         | 8.382e-01 | 4.763e-01     | 1.475         | 5.403e-01      | 1.33             | 9.500e-01         | 2.491             |              |                   |                  |
| [ 25,45.2)                | 34              | 29            | 85.29         | 1.631     | 9.604e-01     | 2.770         | 7.024e-02      | 0.75             | 5.749e-01         | 9.856e-01         |              |                   |                  |
| ≥ 45.2                    | 33              | 26            | 78.79         | 1.198     | 6.947e-01     | 2.066         | 5.156e-01      | 1.09             | 6.407e-01         | 2.127             |              |                   |                  |
| <b>Tertiles</b>           |                 |               |               |           |               |               |                |                  |                   |                   |              |                   |                  |
| < 19                      | 39              | 30            | 76.92         | ----      | ----          | ----          | ----           | 1.11             | 8.624e-01         | 2.111             | 2.25e-01     | 2.08e-01          | 5.19e-02         |
| [ 19,37)                  | 51              | 37            | 72.55         | 9.639e-01 | 5.936e-01     | 1.565         | 8.818e-01      | 1.12             | 7.502e-01         | 2.242             |              |                   |                  |
| ≥ 37                      | 45              | 37            | 82.22         | 1.412     | 8.688e-01     | 2.295         | 1.638e-01      | 0.84             | 6.407e-01         | 1.446             |              |                   |                  |
| <b>Profile Likelihood</b> |                 |               |               |           |               |               |                |                  |                   |                   |              |                   |                  |
| < 25.5                    | 71              | 51            | 71.83         | ----      | ----          | ----          | ----           | 1.34             | 9.774e-01         | 2.111             | 5.23e-03     | 4.46e-03          | 4.14e-04         |
| ≥ 25.5                    | 64              | 53            | 82.81         | 1.747     | 1.183         | 2.580         | 5.007e-03      | 0.82             | 5.941e-01         | 1.087             |              |                   |                  |
| <b>Quantitative</b>       | 135             | 104           | 77.04         | 1.000     | 9.956e-01     | 1.005         | 9.905e-01      |                  |                   |                   | 9.905e-01    | 9.905e-01         |                  |



**Cohort: Derivation**

**Outcome: Progression Free Survival by CPI ( Lung Transplant is Censored )**

**Predictor: Age (years)**

|                           | Patients<br>(N) | Events<br>(n) | Events<br>(%) | HR        | HR<br>95% LCL | HR<br>95% UCL | Wald<br>pvalue | Median<br>(yrs.) | Median<br>95% LCL | Median<br>95% UCL | LR<br>pvalue | Logrank<br>pvalue | DevLIN<br>pvalue |
|---------------------------|-----------------|---------------|---------------|-----------|---------------|---------------|----------------|------------------|-------------------|-------------------|--------------|-------------------|------------------|
| <b>Quintiles</b>          |                 |               |               |           |               |               |                |                  |                   |                   |              |                   |                  |
| < 59.5                    | 26              | 18            | 69.23         | ----      | ----          | ----          | ----           | 1.09             | 4.736e-01         |                   | 9.48e-01     | 9.47e-01          | 4.28e-01         |
| [ 59.5,66.1)              | 28              | 17            | 60.71         | 1.206     | 6.169e-01     | 2.356         | 5.845e-01      | 0.84             | 6.708e-01         | 2.127             |              |                   |                  |
| [ 66.1,69.7)              | 27              | 21            | 77.78         | 1.008     | 5.315e-01     | 1.913         | 9.795e-01      | 1.11             | 8.624e-01         | 2.502             |              |                   |                  |
| [ 69.7,73.9)              | 26              | 23            | 88.46         | 1.202     | 6.437e-01     | 2.245         | 5.634e-01      | 0.86             | 8.241e-01         | 2.070             |              |                   |                  |
| ≥ 73.9                    | 28              | 24            | 85.71         | 1.020     | 5.511e-01     | 1.886         | 9.508e-01      | 1.25             | 6.708e-01         | 2.606             |              |                   |                  |
| <b>Quartiles</b>          |                 |               |               |           |               |               |                |                  |                   |                   |              |                   |                  |
| < 61.2                    | 33              | 22            | 66.67         | ----      | ----          | ----          | ----           | 1.23             | 4.736e-01         | 2.645             | 7.30e-01     | 7.32e-01          | 3.77e-01         |
| [ 61.2,68.5)              | 34              | 25            | 73.53         | 1.150     | 6.448e-01     | 2.050         | 6.363e-01      | 0.93             | 8.378e-01         | 2.127             |              |                   |                  |
| [ 68.5,73.3)              | 35              | 27            | 77.14         | 8.532e-01 | 4.825e-01     | 1.509         | 5.851e-01      | 1.45             | 8.624e-01         | 2.491             |              |                   |                  |
| ≥ 73.3                    | 33              | 29            | 87.88         | 1.077     | 6.168e-01     | 1.881         | 7.940e-01      | 0.94             | 6.708e-01         | 2.300             |              |                   |                  |
| <b>Tertiles</b>           |                 |               |               |           |               |               |                |                  |                   |                   |              |                   |                  |
| < 64.7                    | 45              | 31            | 68.89         | ----      | ----          | ----          | ----           | 1.09             | 6.708e-01         | 1.947             | 5.97e-01     | 5.97e-01          | 1.13e-01         |
| [ 64.7,71.3)              | 45              | 32            | 71.11         | 8.452e-01 | 5.130e-01     | 1.393         | 5.092e-01      | 1.11             | 9.062e-01         | 2.491             |              |                   |                  |
| ≥ 71.3                    | 45              | 40            | 88.89         | 1.073     | 6.700e-01     | 1.719         | 7.687e-01      | 0.90             | 8.049e-01         | 1.703             |              |                   |                  |
| <b>Profile Likelihood</b> |                 |               |               |           |               |               |                |                  |                   |                   |              |                   |                  |
| <71.3                     | 90              | 63            | 70.00         | ----      | ----          | ----          | ----           | 1.09             | 8.624e-01         | 2.031             | 4.40e-01     | 4.36e-01          | 8.33e-02         |
| ≥71.3                     | 45              | 40            | 88.89         | 1.172     | 7.857e-01     | 1.747         | 4.374e-01      | 0.90             | 8.049e-01         | 1.703             |              |                   |                  |
| <b>Quantitative</b>       |                 |               |               |           |               |               |                |                  |                   |                   |              |                   |                  |
|                           | 135             | 103           | 76.30         | 9.939e-01 | 9.677e-01     | 1.021         | 6.535e-01      |                  |                   |                   | 6.541e-01    | 6.535e-01         |                  |
| <b>Predictor: Gender</b>  |                 |               |               |           |               |               |                |                  |                   |                   |              |                   |                  |
| Female                    | 36              | 28            | 77.78         | ----      | ----          | ----          | ----           | 1.40             | 0.939             | 2.50              |              |                   |                  |
| Male                      | 99              | 75            | 75.76         | 1.20      | 0.775         | 1.853         | 4.16E-01       | 0.93             | 0.824             | 1.45              | 4.10E-01     | 4.15E-01          |                  |

**Cohort: Derivation**

**Outcome: Progression Free Survival by CPI ( Lung Transplant is Censored )**

**Predictor: Baseline (4-month) FVC % Predicted**

|                           | Patients<br>(N) | Events<br>(n) | Events<br>(%) | HR        | HR<br>95% LCL | HR<br>95% UCL | Wald<br>pvalue | Median<br>(yrs.) | Median<br>95% LCL | Median<br>95% UCL | LR<br>pvalue | Logrank<br>pvalue | DevLIN<br>pvalue |
|---------------------------|-----------------|---------------|---------------|-----------|---------------|---------------|----------------|------------------|-------------------|-------------------|--------------|-------------------|------------------|
| <b>Quintiles</b>          |                 |               |               |           |               |               |                |                  |                   |                   |              |                   |                  |
| < 43.3                    | 24              | 17            | 70.83         | ----      | ----          | ----          | ----           | 0.79             | 4.025e-01         | 2.300             | 9.30e-03     | 1.11e-02          | 1.87e-02         |
| [ 43.3,56.6)              | 24              | 14            | 58.33         | 5.470e-01 | 2.686e-01     | 1.114         | 9.641e-02      | 1.28             | 9.336e-01         |                   |              |                   |                  |
| [ 56.6,66)                | 23              | 20            | 86.96         | 8.658e-01 | 4.528e-01     | 1.656         | 6.632e-01      | 0.84             | 7.091e-01         | 1.648             |              |                   |                  |
| [ 66,77)                  | 22              | 18            | 81.82         | 7.394e-01 | 3.800e-01     | 1.439         | 3.740e-01      | 1.33             | 8.624e-01         | 2.034             |              |                   |                  |
| ≥ 77                      | 25              | 19            | 76.00         | 3.239e-01 | 1.605e-01     | 6.536e-01     | 1.650e-03      | 1.47             | 1.087             |                   |              |                   |                  |
| <b>Quartiles</b>          |                 |               |               |           |               |               |                |                  |                   |                   |              |                   |                  |
| < 47.8                    | 30              | 21            | 70.00         | ----      | ----          | ----          | ----           | 0.79             | 3.587e-01         | 2.223             | 7.99e-03     | 9.17e-03          | 2.81e-02         |
| [ 47.8,61.1)              | 30              | 20            | 66.67         | 6.747e-01 | 3.639e-01     | 1.251         | 2.118e-01      | 0.99             | 8.624e-01         | 2.850             |              |                   |                  |
| [ 61.1,74)                | 28              | 24            | 85.71         | 9.284e-01 | 5.152e-01     | 1.673         | 8.048e-01      | 0.94             | 7.173e-01         | 1.648             |              |                   |                  |
| ≥ 74                      | 30              | 23            | 76.67         | 3.869e-01 | 2.066e-01     | 7.245e-01     | 3.011e-03      | 1.71             | 1.087             | 4.153             |              |                   |                  |
| <b>Tertiles</b>           |                 |               |               |           |               |               |                |                  |                   |                   |              |                   |                  |
| < 52.8                    | 40              | 25            | 62.50         | ----      | ----          | ----          | ----           | 0.93             | 6.708e-01         | 2.127             | 1.74e-02     | 1.92e-02          | 1.16e-01         |
| [ 52.8,69.9)              | 40              | 33            | 82.50         | 9.099e-01 | 5.394e-01     | 1.535         | 7.233e-01      | 0.91             | 7.173e-01         | 1.648             |              |                   |                  |
| ≥ 69.9                    | 38              | 30            | 78.95         | 4.916e-01 | 2.809e-01     | 8.602e-01     | 1.286e-02      | 1.45             | 1.112             | 2.645             |              |                   |                  |
| <b>Profile Likelihood</b> |                 |               |               |           |               |               |                |                  |                   |                   |              |                   |                  |
| < 76.9                    | 93              | 69            | 74.19         | ----      | ----          | ----          | ----           | 0.94             | 8.378e-01         | 1.402             | 1.35e-03     | 2.27e-03          | 1.40e-02         |
| ≥ 76.9                    | 25              | 19            | 76.00         | 4.272e-01 | 2.438e-01     | 7.485e-01     | 2.957e-03      | 1.47             | 1.087             |                   |              |                   |                  |
| <b>Quantitative</b>       | 118             | 88            | 74.58         | 9.878e-01 | 9.764e-01     | 9.994e-01     | 3.861e-02      |                  |                   |                   | 3.710e-02    | 3.842e-02         |                  |

**Cohort: Derivation**  
**Outcome: Progression Free Survival by CPI ( Lung Transplant is Censored )**  
**Predictor: Baseline (4-month) DLco % Predicted**

|                           | Patients<br>(N) | Events<br>(n) | Events<br>(%) | HR        | HR<br>95% LCL | HR<br>95% UCL | Wald<br>pvalue | Median<br>(yrs.) | Median<br>95% LCL | Median<br>95% UCL | LR<br>pvalue | Logrank<br>pvalue | DevLIN<br>pvalue |
|---------------------------|-----------------|---------------|---------------|-----------|---------------|---------------|----------------|------------------|-------------------|-------------------|--------------|-------------------|------------------|
| <b>Quintiles</b>          |                 |               |               |           |               |               |                |                  |                   |                   |              |                   |                  |
| < 28.9                    | 21              | 15            | 71.43         | ----      | ----          | ----          | ----           | 0.90             | 4.025e-01         |                   | 4.16e-02     | 2.74e-02          | 7.75e-01         |
| [ 28.9,39)                | 22              | 15            | 68.18         | 5.949e-01 | 2.875e-01     | 1.231         | 1.614e-01      | 1.28             | 8.241e-01         |                   |              |                   |                  |
| [ 39,49.4)                | 21              | 18            | 85.71         | 5.575e-01 | 2.782e-01     | 1.117         | 9.940e-02      | 0.98             | 7.091e-01         | 2.341             |              |                   |                  |
| [ 49.4,60)                | 20              | 16            | 80.00         | 3.934e-01 | 1.898e-01     | 8.156e-01     | 1.214e-02      | 1.33             | 8.624e-01         |                   |              |                   |                  |
| ≥ 60                      | 22              | 17            | 77.27         | 3.221e-01 | 1.525e-01     | 6.803e-01     | 2.981e-03      | 1.47             | 8.433e-01         |                   |              |                   |                  |
| <b>Quartiles</b>          |                 |               |               |           |               |               |                |                  |                   |                   |              |                   |                  |
| < 31.6                    | 26              | 20            | 76.92         | ----      | ----          | ----          | ----           | 0.91             | 8.241e-01         | 1.714             | 3.02e-02     | 2.52e-02          | 7.41e-01         |
| [ 31.6,43.8)              | 27              | 19            | 70.37         | 9.716e-01 | 5.175e-01     | 1.824         | 9.285e-01      | 0.93             | 6.407e-01         | 2.078             |              |                   |                  |
| [ 43.8,57)                | 25              | 21            | 84.00         | 5.385e-01 | 2.889e-01     | 1.004         | 5.139e-02      | 1.70             | 8.624e-01         | 2.519             |              |                   |                  |
| ≥ 57                      | 28              | 21            | 75.00         | 4.542e-01 | 2.390e-01     | 8.632e-01     | 1.600e-02      | 1.47             | 1.035             | 4.153             |              |                   |                  |
| <b>Tertiles</b>           |                 |               |               |           |               |               |                |                  |                   |                   |              |                   |                  |
| < 36.6                    | 35              | 24            | 68.57         | ----      | ----          | ----          | ----           | 0.91             | 6.708e-01         | 1.714             | 5.15e-02     | 4.50e-02          | 8.65e-01         |
| [ 36.6,53.4)              | 37              | 31            | 83.78         | 6.818e-01 | 3.990e-01     | 1.165         | 1.611e-01      | 1.23             | 8.624e-01         | 2.034             |              |                   |                  |
| ≥ 53.4                    | 34              | 26            | 76.47         | 4.859e-01 | 2.727e-01     | 8.656e-01     | 1.428e-02      | 1.47             | 8.433e-01         | 2.850             |              |                   |                  |
| <b>Profile Likelihood</b> |                 |               |               |           |               |               |                |                  |                   |                   |              |                   |                  |
| <42.7                     | 53              | 39            | 73.58         | ----      | ----          | ----          | ----           | 0.93             | 8.241e-01         | 1.396             | 3.29e-03     | 2.54e-03          | 2.97e-01         |
| ≥42.7                     | 53              | 42            | 79.25         | 5.026e-01 | 3.186e-01     | 7.928e-01     | 3.090e-03      | 1.60             | 1.112             | 2.491             |              |                   |                  |
| <b>Quantitative</b>       |                 |               |               |           |               |               |                |                  |                   |                   |              |                   |                  |
|                           | 106             | 81            | 76.42         | 9.793e-01 | 9.654e-01     | 9.935e-01     | 4.427e-03      |                  |                   |                   | 4.185e-03    | 4.228e-03         |                  |

**Cohort: Derivation**

**Outcome: Progression Free Survival by CPI ( Lung Transplant is Censored )**

**Predictor: Baseline (4-month) CPI**

|                           | Patients<br>(N) | Events<br>(n) | Events<br>(%) | HR    | HR<br>95% LCL | HR<br>95% UCL | Wald<br>pvalue | Median<br>(yrs.) | Median<br>95% LCL | Median<br>95% UCL | LR<br>pvalue | Logrank<br>pvalue | DevLIN<br>pvalue |
|---------------------------|-----------------|---------------|---------------|-------|---------------|---------------|----------------|------------------|-------------------|-------------------|--------------|-------------------|------------------|
| <b>Quintiles</b>          |                 |               |               |       |               |               |                |                  |                   |                   |              |                   |                  |
| < 43                      | 22              | 17            | 77.27         | ----  | ----          | ----          | ----           | 1.47             | 1.035             |                   | 7.29e-02     | 6.07e-02          | 8.17e-01         |
| [ 43,50.8)                | 20              | 17            | 85.00         | 1.133 | 5.708e-01     | 2.248         | 7.213e-01      | 1.65             | 8.624e-01         | 3.261             |              |                   |                  |
| [ 50.8,58.7)              | 21              | 17            | 80.95         | 1.720 | 8.549e-01     | 3.459         | 1.285e-01      | 1.25             | 8.624e-01         | 2.502             |              |                   |                  |
| [ 58.7,64.5)              | 22              | 14            | 63.64         | 1.923 | 9.240e-01     | 4.002         | 8.033e-02      | 0.93             | 6.708e-01         | 2.606             |              |                   |                  |
| ≥ 64.5                    | 21              | 16            | 76.19         | 2.513 | 1.238         | 5.100         | 1.072e-02      | 0.90             | 3.313e-01         | 2.223             |              |                   |                  |
| <b>Quartiles</b>          |                 |               |               |       |               |               |                |                  |                   |                   |              |                   |                  |
| < 44.4                    | 25              | 20            | 80.00         | ----  | ----          | ----          | ----           | 1.47             | 1.035             | 2.645             | 4.84e-02     | 3.31e-02          | 7.92e-01         |
| [ 44.4,56)                | 27              | 22            | 81.48         | 1.089 | 5.873e-01     | 2.018         | 7.875e-01      | 1.25             | 8.624e-01         | 2.850             |              |                   |                  |
| [ 56,62.7)                | 27              | 21            | 77.78         | 1.602 | 8.499e-01     | 3.021         | 1.451e-01      | 0.99             | 9.336e-01         | 2.031             |              |                   |                  |
| ≥ 62.7                    | 27              | 18            | 66.67         | 2.372 | 1.228         | 4.583         | 1.015e-02      | 0.84             | 3.313e-01         | 2.223             |              |                   |                  |
| <b>Tertiles</b>           |                 |               |               |       |               |               |                |                  |                   |                   |              |                   |                  |
| < 47.7                    | 34              | 27            | 79.41         | ----  | ----          | ----          | ----           | 1.47             | 1.035             | 2.491             | 4.47e-02     | 3.74e-02          | 9.23e-01         |
| [ 47.7,59.8)              | 37              | 30            | 81.08         | 1.381 | 8.045e-01     | 2.369         | 2.417e-01      | 1.25             | 8.624e-01         | 2.034             |              |                   |                  |
| ≥ 59.8                    | 35              | 24            | 68.57         | 2.093 | 1.177         | 3.724         | 1.195e-02      | 0.90             | 7.091e-01         | 2.031             |              |                   |                  |
| <b>Profile Likelihood</b> |                 |               |               |       |               |               |                |                  |                   |                   |              |                   |                  |
| <56.2                     | 54              | 43            | 79.63         | ----  | ----          | ----          | ----           | 1.60             | 1.112             | 2.341             | 4.01e-03     | 3.10e-03          | 2.01e-01         |
| ≥56.2                     | 52              | 38            | 73.08         | 1.966 | 1.246         | 3.102         | 3.693e-03      | 0.93             | 8.241e-01         | 1.402             |              |                   |                  |
| <b>Quantitative</b>       | 106             | 81            | 76.42         | 1.026 | 1.007         | 1.045         | 8.395e-03      |                  |                   |                   | 7.926e-03    | 8.375e-03         |                  |

Cohort: **Derivation**

Outcome: **Progression Free Survival by CPI ( Lung Transplant is Censored )**

Predictor: **Baseline (3-month) FVC % Predicted**

|                           | Patients<br>(N) | Events<br>(n) | Events<br>(%) | HR        | HR<br>95% LCL | HR<br>95% UCL | Wald<br>pvalue | Median<br>(yrs.) | Median<br>95% LCL | Median<br>95% UCL | LR<br>pvalue | Logrank<br>pvalue | DevLIN<br>pvalue |
|---------------------------|-----------------|---------------|---------------|-----------|---------------|---------------|----------------|------------------|-------------------|-------------------|--------------|-------------------|------------------|
| <b>Quintiles</b>          |                 |               |               |           |               |               |                |                  |                   |                   |              |                   |                  |
| < 43.1                    | 22              | 15            | 68.18         | ----      | ----          | ----          | ----           | 0.67             | 3.313e-01         |                   | 2.66e-02     | 3.66e-02          | 9.92e-02         |
| [ 43.1,56.5)              | 21              | 11            | 52.38         | 6.731e-01 | 3.067e-01     | 1.477         | 3.236e-01      | 1.03             | 9.008e-01         |                   |              |                   |                  |
| [ 56.5,65.7)              | 22              | 19            | 86.36         | 8.891e-01 | 4.507e-01     | 1.754         | 7.346e-01      | 0.86             | 6.626e-01         | 2.031             |              |                   |                  |
| [ 65.7,76.7)              | 19              | 16            | 84.21         | 8.084e-01 | 3.984e-01     | 1.640         | 5.556e-01      | 1.33             | 8.624e-01         | 2.034             |              |                   |                  |
| ≥ 76.7                    | 22              | 16            | 72.73         | 3.451e-01 | 1.637e-01     | 7.275e-01     | 5.172e-03      | 1.47             | 1.087             |                   |              |                   |                  |
| <b>Quartiles</b>          |                 |               |               |           |               |               |                |                  |                   |                   |              |                   |                  |
| < 47.8                    | 27              | 18            | 66.67         | ----      | ----          | ----          | ----           | 0.67             | 3.313e-01         | 2.300             | 1.41e-02     | 1.76e-02          | 7.37e-02         |
| [ 47.8,60.5)              | 27              | 17            | 62.96         | 7.264e-01 | 3.717e-01     | 1.419         | 3.497e-01      | 0.99             | 8.624e-01         |                   |              |                   |                  |
| [ 60.5,73.4)              | 27              | 23            | 85.19         | 9.229e-01 | 4.962e-01     | 1.717         | 8.000e-01      | 0.91             | 7.091e-01         | 1.648             |              |                   |                  |
| ≥ 73.4                    | 25              | 19            | 76.00         | 3.823e-01 | 1.940e-01     | 7.534e-01     | 5.465e-03      | 1.95             | 1.087             |                   |              |                   |                  |
| <b>Tertiles</b>           |                 |               |               |           |               |               |                |                  |                   |                   |              |                   |                  |
| < 52.4                    | 36              | 21            | 58.33         | ----      | ----          | ----          | ----           | 1.03             | 5.010e-01         | 2.223             | 2.42e-02     | 2.64e-02          | 2.29e-01         |
| [ 52.4,69.6)              | 36              | 29            | 80.56         | 1.017     | 5.785e-01     | 1.789         | 9.529e-01      | 0.86             | 6.626e-01         | 1.235             |              |                   |                  |
| ≥ 69.6                    | 34              | 27            | 79.41         | 5.180e-01 | 2.857e-01     | 9.392e-01     | 3.025e-02      | 1.47             | 1.144             | 2.645             |              |                   |                  |
| <b>Profile Likelihood</b> |                 |               |               |           |               |               |                |                  |                   |                   |              |                   |                  |
| < 76.3                    | 83              | 60            | 72.29         | ----      | ----          | ----          | ----           | 0.93             | 8.049e-01         | 1.333             | 1.05e-03     | 1.76e-03          | 1.15e-02         |
| ≥ 76.3                    | 23              | 17            | 73.91         | 4.044e-01 | 2.256e-01     | 7.248e-01     | 2.358e-03      | 2.07             | 1.087             |                   |              |                   |                  |
| <b>Quantitative</b>       | 106             | 77            | 72.64         | 9.871e-01 | 9.753e-01     | 9.991e-01     | 3.502e-02      |                  |                   |                   | 3.383e-02    | 3.485e-02         |                  |

Cohort: Derivation

Outcome: Progression Free Survival by CPI ( Lung Transplant is Censored )

Predictor: Baseline (3-month) DLco % Predicted

|                           | Patients<br>(N) | Events<br>(n) | Events<br>(%) | HR        | HR<br>95% LCL | HR<br>95% UCL | Wald<br>pvalue | Median<br>(yrs.) | Median<br>95% LCL | Median<br>95% UCL | LR<br>pvalue | Logrank<br>pvalue | DevLIN<br>pvalue |
|---------------------------|-----------------|---------------|---------------|-----------|---------------|---------------|----------------|------------------|-------------------|-------------------|--------------|-------------------|------------------|
| <b>Quintiles</b>          |                 |               |               |           |               |               |                |                  |                   |                   |              |                   |                  |
| < 28.6                    | 18              | 13            | 72.22         | ----      | ----          | ----          | ----           | 0.91             | 2.300e-01         |                   | 6.31e-02     | 4.85e-02          | 7.94e-01         |
| [ 28.6,38)                | 18              | 11            | 61.11         | 5.432e-01 | 2.388e-01     | 1.236         | 1.455e-01      | 1.40             | 3.313e-01         |                   |              |                   |                  |
| [ 38,49.9)                | 20              | 17            | 85.00         | 5.624e-01 | 2.718e-01     | 1.164         | 1.209e-01      | 0.99             | 8.624e-01         | 2.078             |              |                   |                  |
| [ 49.9,61)                | 18              | 15            | 83.33         | 4.871e-01 | 2.292e-01     | 1.035         | 6.145e-02      | 1.25             | 8.624e-01         | 2.645             |              |                   |                  |
| ≥ 61                      | 20              | 15            | 75.00         | 2.968e-01 | 1.334e-01     | 6.602e-01     | 2.903e-03      | 1.47             | 4.983e-01         |                   |              |                   |                  |
| <b>Quartiles</b>          |                 |               |               |           |               |               |                |                  |                   |                   |              |                   |                  |
| < 31.4                    | 23              | 17            | 73.91         | ----      | ----          | ----          | ----           | 0.94             | 6.708e-01         | 2.127             | 2.18e-02     | 2.34e-02          | 4.93e-01         |
| [ 31.4,41.3)              | 24              | 17            | 70.83         | 1.154     | 5.873e-01     | 2.269         | 6.770e-01      | 0.93             | 6.407e-01         | 2.031             |              |                   |                  |
| [ 41.3,57.2)              | 23              | 20            | 86.96         | 7.280e-01 | 3.802e-01     | 1.394         | 3.380e-01      | 1.25             | 8.049e-01         | 2.034             |              |                   |                  |
| ≥ 57.2                    | 24              | 17            | 70.83         | 4.186e-01 | 2.064e-01     | 8.490e-01     | 1.579e-02      | 1.74             | 8.433e-01         |                   |              |                   |                  |
| <b>Tertiles</b>           |                 |               |               |           |               |               |                |                  |                   |                   |              |                   |                  |
| < 34.5                    | 31              | 21            | 67.74         | ----      | ----          | ----          | ----           | 0.94             | 4.025e-01         | 2.127             | 7.14e-02     | 7.43e-02          | 6.06e-01         |
| [ 34.5,54.3)              | 32              | 26            | 81.25         | 8.383e-01 | 4.704e-01     | 1.494         | 5.496e-01      | 1.09             | 8.624e-01         | 1.947             |              |                   |                  |
| ≥ 54.3                    | 31              | 24            | 77.42         | 5.104e-01 | 2.776e-01     | 9.384e-01     | 3.042e-02      | 1.47             | 8.049e-01         | 3.261             |              |                   |                  |
| <b>Profile Likelihood</b> |                 |               |               |           |               |               |                |                  |                   |                   |              |                   |                  |
| <42.7                     | 48              | 35            | 72.92         | ----      | ----          | ----          | ----           | 0.93             | 6.708e-01         | 1.284             | 4.77e-03     | 3.82e-03          | 2.98e-01         |
| ≥42.7                     | 46              | 36            | 78.26         | 4.962e-01 | 3.058e-01     | 8.052e-01     | 4.548e-03      | 1.60             | 1.035             | 2.491             |              |                   |                  |
| <b>Quantitative</b>       |                 |               |               |           |               |               |                |                  |                   |                   |              |                   |                  |
|                           | 94              | 71            | 75.53         | 9.802e-01 | 9.660e-01     | 9.946e-01     | 7.305e-03      |                  |                   |                   | 7.074e-03    | 6.879e-03         |                  |

**Cohort: Derivation**  
**Outcome: Progression Free Survival by CPI ( Lung Transplant is Censored )**  
**Predictor: Baseline (3-month) CPI**

|                           | Patients<br>(N) | Events<br>(n) | Events<br>(%) | HR    | HR<br>95% LCL | HR<br>95% UCL | Wald<br>pvalue | Median<br>(yrs.) | Median<br>95% LCL | Median<br>95% UCL | LR<br>pvalue | Logrank<br>pvalue | DevLIN<br>pvalue |
|---------------------------|-----------------|---------------|---------------|-------|---------------|---------------|----------------|------------------|-------------------|-------------------|--------------|-------------------|------------------|
| <b>Quintiles</b>          |                 |               |               |       |               |               |                |                  |                   |                   |              |                   |                  |
| < 42.8                    | 19              | 14            | 73.68         | ----  | ----          | ----          | ----           | 1.74             | 4.983e-01         |                   | 1.30e-01     | 1.35e-01          | 9.46e-01         |
| [ 42.8,51.5)              | 18              | 16            | 88.89         | 1.439 | 6.893e-01     | 3.003         | 3.325e-01      | 1.14             | 8.624e-01         | 2.645             |              |                   |                  |
| [ 51.5,59)                | 19              | 15            | 78.95         | 1.939 | 9.055e-01     | 4.154         | 8.830e-02      | 1.23             | 8.624e-01         | 2.502             |              |                   |                  |
| [ 59,65.1)                | 19              | 12            | 63.16         | 2.307 | 1.031         | 5.161         | 4.189e-02      | 0.71             | 6.407e-01         |                   |              |                   |                  |
| ≥ 65.1                    | 19              | 14            | 73.68         | 2.421 | 1.122         | 5.222         | 2.423e-02      | 0.91             | 2.300e-01         |                   |              |                   |                  |
| <b>Quartiles</b>          |                 |               |               |       |               |               |                |                  |                   |                   |              |                   |                  |
| < 44.3                    | 23              | 18            | 78.26         | ----  | ----          | ----          | ----           | 1.47             | 8.049e-01         |                   | 4.33e-02     | 3.73e-02          | 6.29e-01         |
| [ 44.3,56.1)              | 24              | 19            | 79.17         | 1.237 | 6.415e-01     | 2.387         | 5.252e-01      | 1.60             | 8.624e-01         | 2.519             |              |                   |                  |
| [ 56.1,62.8)              | 24              | 19            | 79.17         | 2.214 | 1.126         | 4.354         | 2.128e-02      | 0.93             | 6.708e-01         | 1.446             |              |                   |                  |
| ≥ 62.8                    | 23              | 15            | 65.22         | 2.251 | 1.111         | 4.560         | 2.428e-02      | 0.91             | 3.313e-01         |                   |              |                   |                  |
| <b>Tertiles</b>           |                 |               |               |       |               |               |                |                  |                   |                   |              |                   |                  |
| < 47.6                    | 31              | 24            | 77.42         | ----  | ----          | ----          | ----           | 1.47             | 1.035             | 2.645             | 4.64e-02     | 4.40e-02          | 9.02e-01         |
| [ 47.6,59.9)              | 32              | 27            | 84.38         | 1.572 | 8.917e-01     | 2.770         | 1.179e-01      | 0.99             | 8.624e-01         | 1.596             |              |                   |                  |
| ≥ 59.9                    | 31              | 20            | 64.52         | 2.150 | 1.161         | 3.981         | 1.490e-02      | 0.91             | 4.025e-01         | 2.127             |              |                   |                  |
| <b>Profile Likelihood</b> |                 |               |               |       |               |               |                |                  |                   |                   |              |                   |                  |
| <56.1                     | 47              | 37            | 78.72         | ----  | ----          | ----          | ----           | 1.47             | 1.087             | 2.078             | 5.44e-03     | 4.32e-03          | 2.11e-01         |
| ≥56.1                     | 47              | 34            | 72.34         | 2.000 | 1.232         | 3.247         | 5.063e-03      | 0.91             | 6.708e-01         | 1.402             |              |                   |                  |
| <b>Quantitative</b>       | 94              | 71            | 75.53         | 1.025 | 1.006         | 1.045         | 1.174e-02      |                  |                   |                   | 1.134e-02    | 1.155e-02         |                  |

**Cohort: Derivation**  
**Outcome: Progression Free Survival by CPI ( Lung Transplant is Censored )**  
**Predictor: MMP7 ( ng / mL )**

|                           | Patients<br>(N) | Events<br>(n) | Events<br>(%) | HR        | HR<br>95% LCL | HR<br>95% UCL | Wald<br>pvalue | Median<br>(yrs.) | Median<br>95% LCL | Median<br>95% UCL | LR<br>pvalue | Logrank<br>pvalue | DevLIN<br>pvalue |
|---------------------------|-----------------|---------------|---------------|-----------|---------------|---------------|----------------|------------------|-------------------|-------------------|--------------|-------------------|------------------|
| <b>Quintiles</b>          |                 |               |               |           |               |               |                |                  |                   |                   |              |                   |                  |
| < 2.7                     | 26              | 20            | 76.92         | ----      | ----          | ----          | ----           | 1.33             | 4.873e-01         | 2.431             | 6.49e-01     | 6.25e-01          | 5.44e-01         |
| [ 2.7,3.76)               | 23              | 18            | 78.26         | 7.708e-01 | 4.065e-01     | 1.462         | 4.254e-01      | 1.47             | 8.433e-01         |                   |              |                   |                  |
| [ 3.76,4.99)              | 27              | 18            | 66.67         | 8.481e-01 | 4.414e-01     | 1.629         | 6.209e-01      | 1.03             | 8.049e-01         | 2.519             |              |                   |                  |
| [ 4.99,6.41)              | 26              | 22            | 84.62         | 1.212     | 6.603e-01     | 2.224         | 5.350e-01      | 0.94             | 3.751e-01         | 2.031             |              |                   |                  |
| ≥ 6.41                    | 26              | 20            | 76.92         | 8.503e-01 | 4.556e-01     | 1.587         | 6.103e-01      | 0.95             | 8.378e-01         | 2.932             |              |                   |                  |
| <b>Quartiles</b>          |                 |               |               |           |               |               |                |                  |                   |                   |              |                   |                  |
| < 2.92                    | 32              | 25            | 78.12         | ----      | ----          | ----          | ----           | 1.40             | 8.433e-01         | 2.431             | 5.64e-01     | 5.74e-01          | 5.69e-01         |
| [ 2.92,4.3)               | 30              | 21            | 70.00         | 7.823e-01 | 4.328e-01     | 1.414         | 4.163e-01      | 1.03             | 8.049e-01         |                   |              |                   |                  |
| [ 4.3,5.73)               | 33              | 25            | 75.76         | 1.194     | 6.844e-01     | 2.084         | 5.320e-01      | 0.86             | 5.284e-01         | 2.034             |              |                   |                  |
| ≥ 5.73                    | 33              | 27            | 81.82         | 1.021     | 5.910e-01     | 1.764         | 9.409e-01      | 0.98             | 8.378e-01         | 2.502             |              |                   |                  |
| <b>Tertiles</b>           |                 |               |               |           |               |               |                |                  |                   |                   |              |                   |                  |
| < 3.51                    | 43              | 32            | 74.42         | ----      | ----          | ----          | ----           | 1.47             | 8.624e-01         | 2.431             | 5.96e-01     | 6.01e-01          | 4.99e-01         |
| [ 3.51,5.35)              | 42              | 30            | 71.43         | 1.263     | 7.601e-01     | 2.098         | 3.677e-01      | 0.91             | 6.708e-01         | 1.402             |              |                   |                  |
| ≥ 5.35                    | 43              | 36            | 83.72         | 1.228     | 7.618e-01     | 1.979         | 3.992e-01      | 0.98             | 8.378e-01         | 2.034             |              |                   |                  |
| <b>Profile Likelihood</b> |                 |               |               |           |               |               |                |                  |                   |                   |              |                   |                  |
| < 4.1                     | 54              | 40            | 74.07         | ----      | ----          | ----          | ----           | 1.40             | 8.624e-01         | 2.341             | 1.45e-01     | 1.48e-01          | 6.65e-02         |
| ≥ 4.1                     | 74              | 58            | 78.38         | 1.350     | 8.988e-01     | 2.027         | 1.483e-01      | 0.94             | 8.241e-01         | 1.446             |              |                   |                  |
| <b>Quantitative</b>       | 128             | 98            | 76.56         | 1.009     | 0.9424        | 1.081         | 7.889e-01      |                  |                   |                   | 7.899e-01    | 7.889e-01         |                  |



Cohort: Derivation

Outcome: Progression Free Survival by CPI ( Lung Transplant is Censored )

Predictor: ICAM1 ( ng / mL )

|                           | Patients<br>(N) | Events<br>(n) | Events<br>(%) | HR        | HR<br>95% LCL | HR<br>95% UCL | Wald<br>pvalue | Median<br>(yrs.) | Median<br>95% LCL | Median<br>95% UCL | LR<br>pvalue | Logrank<br>pvalue | DevLIN<br>pvalue |
|---------------------------|-----------------|---------------|---------------|-----------|---------------|---------------|----------------|------------------|-------------------|-------------------|--------------|-------------------|------------------|
| <b>Quintiles</b>          |                 |               |               |           |               |               |                |                  |                   |                   |              |                   |                  |
| < 158                     | 27              | 23            | 85.19         | ----      | ----          | ----          | ----           | 1.13             | 5.010e-01         | 2.070             | 7.64e-01     | 7.60e-01          | 2.36e-01         |
| [ 158,205)                | 26              | 19            | 73.08         | 9.227e-01 | 5.010e-01     | 1.699         | 7.962e-01      | 0.86             | 8.433e-01         | 2.300             |              |                   |                  |
| [ 205,252)                | 27              | 19            | 70.37         | 9.201e-01 | 5.002e-01     | 1.693         | 7.889e-01      | 1.60             | 6.708e-01         | 3.031             |              |                   |                  |
| [ 252,351)                | 27              | 19            | 70.37         | 1.179     | 6.400e-01     | 2.172         | 5.971e-01      | 0.95             | 6.626e-01         | 2.034             |              |                   |                  |
| ≥ 351                     | 28              | 23            | 82.14         | 7.692e-01 | 4.237e-01     | 1.396         | 3.884e-01      | 1.40             | 8.350e-01         | 2.932             |              |                   |                  |
| <b>Quartiles</b>          |                 |               |               |           |               |               |                |                  |                   |                   |              |                   |                  |
| < 175                     | 32              | 27            | 84.38         | ----      | ----          | ----          | ----           | 1.11             | 7.091e-01         | 2.070             | 7.34e-01     | 7.32e-01          | 3.13e-01         |
| [ 175,230)                | 35              | 26            | 74.29         | 1.181     | 6.876e-01     | 2.029         | 5.462e-01      | 0.86             | 7.940e-01         | 2.127             |              |                   |                  |
| [ 230,318)                | 33              | 21            | 63.64         | 8.785e-01 | 4.963e-01     | 1.555         | 6.565e-01      | 1.33             | 9.062e-01         | 3.031             |              |                   |                  |
| ≥ 318                     | 35              | 29            | 82.86         | 9.061e-01 | 5.304e-01     | 1.548         | 7.180e-01      | 0.98             | 8.350e-01         | 2.034             |              |                   |                  |
| <b>Tertiles</b>           |                 |               |               |           |               |               |                |                  |                   |                   |              |                   |                  |
| < 197                     | 46              | 37            | 80.43         | ----      | ----          | ----          | ----           | 1.11             | 8.433e-01         | 1.744             | 8.08e-01     | 8.09e-01          | 5.86e-01         |
| [ 197,274)                | 43              | 31            | 72.09         | 1.112     | 6.897e-01     | 1.794         | 6.622e-01      | 1.03             | 7.502e-01         | 2.491             |              |                   |                  |
| ≥ 274                     | 46              | 35            | 76.09         | 9.456e-01 | 5.910e-01     | 1.513         | 8.155e-01      | 0.98             | 8.350e-01         | 2.031             |              |                   |                  |
| <b>Profile Likelihood</b> |                 |               |               |           |               |               |                |                  |                   |                   |              |                   |                  |
| <232.5                    | 69              | 55            | 79.71         | ----      | ----          | ----          | ----           | 0.90             | 7.940e-01         | 1.446             | 2.07e-01     | 2.09e-01          | 4.19e-02         |
| ≥232.5                    | 66              | 48            | 72.73         | 7.767e-01 | 5.240e-01     | 1.151         | 2.081e-01      | 1.33             | 9.062e-01         | 2.034             |              |                   |                  |
| <b>Quantitative</b>       | 135             | 103           | 76.30         | 1.000     | 9.987e-01     | 1.002         | 8.974e-01      |                  |                   |                   | 8.977e-01    | 8.974e-01         |                  |

Cohort: **Derivation**

Outcome: **Progression Free Survival by CPI ( Lung Transplant is Censored )**

Predictor: **IL8 ( ng / mL )**

|                           | Patients<br>(N) | Events<br>(n) | Events<br>(%) | HR        | HR<br>95% LCL | HR<br>95% UCL | Wald<br>pvalue | Median<br>(yrs.) | Median<br>95% LCL | Median<br>95% UCL | LR<br>pvalue | Logrank<br>pvalue | DevLIN<br>pvalue |
|---------------------------|-----------------|---------------|---------------|-----------|---------------|---------------|----------------|------------------|-------------------|-------------------|--------------|-------------------|------------------|
| <b>Quintiles</b>          |                 |               |               |           |               |               |                |                  |                   |                   |              |                   |                  |
| < 0.0051                  | 25              | 17            | 68.00         | ----      | ----          | ----          | ----           | 1.40             | 8.433e-01         | 2.431             | 1.63e-01     | 1.42e-01          | 5.57e-01         |
| [ 0.0051,0.00776)         | 27              | 20            | 74.07         | 1.753     | 9.131e-01     | 3.366         | 9.165e-02      | 1.31             | 9.500e-01         |                   |              |                   |                  |
| [ 0.00776,0.00968)        | 28              | 23            | 82.14         | 8.186e-01 | 4.241e-01     | 1.580         | 5.509e-01      | 0.91             | 7.940e-01         | 2.645             |              |                   |                  |
| [ 0.00968,0.013)          | 27              | 23            | 85.19         | 1.021     | 5.435e-01     | 1.919         | 9.480e-01      | 0.86             | 7.091e-01         | 2.223             |              |                   |                  |
| ≥ 0.013                   | 28              | 20            | 71.43         | 1.349     | 7.185e-01     | 2.534         | 3.514e-01      | 0.90             | 3.587e-01         | 2.031             |              |                   |                  |
| <b>Quartiles</b>          |                 |               |               |           |               |               |                |                  |                   |                   |              |                   |                  |
| < 0.0056                  | 32              | 22            | 68.75         | ----      | ----          | ----          | ----           | 1.40             | 8.433e-01         | 2.070             | 4.96e-03     | 5.12e-03          | 2.80e-02         |
| [ 0.0056,0.0087)          | 31              | 24            | 77.42         | 1.714     | 9.926e-01     | 2.960         | 5.320e-02      | 2.03             | 9.856e-01         | 4.153             |              |                   |                  |
| [ 0.0087,0.011)           | 29              | 24            | 82.76         | 6.444e-01 | 3.550e-01     | 1.170         | 1.487e-01      | 0.84             | 7.091e-01         | 2.341             |              |                   |                  |
| ≥ 0.011                   | 43              | 33            | 76.74         | 1.271     | 7.096e-01     | 2.277         | 4.199e-01      | 0.86             | 6.407e-01         | 1.596             |              |                   |                  |
| <b>Tertiles</b>           |                 |               |               |           |               |               |                |                  |                   |                   |              |                   |                  |
| < 0.0066                  | 41              | 29            | 70.73         | ----      | ----          | ----          | ----           | 1.40             | 1.112             | 2.070             | 2.63e-02     | 2.01e-02          | 1.40e-01         |
| [ 0.0066,0.00997)         | 48              | 38            | 79.17         | 9.044e-01 | 5.525e-01     | 1.480         | 6.893e-01      | 1.03             | 8.241e-01         | 2.606             |              |                   |                  |
| ≥ 0.00997                 | 46              | 36            | 78.26         | 1.704     | 1.038         | 2.797         | 3.504e-02      | 0.86             | 6.708e-01         | 1.703             |              |                   |                  |
| <b>Profile Likelihood</b> |                 |               |               |           |               |               |                |                  |                   |                   |              |                   |                  |
| < 0.0084                  | 60              | 43            | 71.67         | ----      | ----          | ----          | ----           | 1.40             | 1.112             | 2.431             | 1.32e-03     | 1.36e-03          | 9.69e-03         |
| ≥ 0.0084                  | 75              | 60            | 80.00         | 1.937     | 1.286         | 2.919         | 1.567e-03      | 0.86             | 7.173e-01         | 1.144             |              |                   |                  |
| <b>Quantitative*</b>      | 135             | 103           | 76.30         | 1.023     | 1.004         | 1.042         | 1.539e-02      |                  |                   |                   | 4.522e-02    | 1.432e-02         |                  |

\*Units of pg / mL were used in **Quantitative model only**.

**Cohort: Derivation**  
**Outcome: Progression Free Survival by CPI ( Lung Transplant is Censored )**  
**Predictor: VCAM1 ( ng / mL )**

|                           | Patients<br>(N) | Events<br>(n) | Events<br>(%) | HR        | HR<br>95% LCL | HR<br>95% UCL | Wald<br>pvalue | Median<br>(yrs.) | Median<br>95% LCL | Median<br>95% UCL | LR<br>pvalue | Logrank<br>pvalue | DevLIN<br>pvalue |
|---------------------------|-----------------|---------------|---------------|-----------|---------------|---------------|----------------|------------------|-------------------|-------------------|--------------|-------------------|------------------|
| <b>Quintiles</b>          |                 |               |               |           |               |               |                |                  |                   |                   |              |                   |                  |
| < 335                     | 26              | 16            | 61.54         | ----      | ----          | ----          | ----           | 1.33             | 9.856e-01         |                   | 1.01e-01     | 1.16e-01          | 2.76e-01         |
| [ 335,402)                | 27              | 21            | 77.78         | 7.216e-01 | 3.713e-01     | 1.402         | 3.356e-01      | 2.08             | 1.648             | 4.044             |              |                   |                  |
| [ 402,457)                | 29              | 22            | 75.86         | 1.426     | 7.430e-01     | 2.736         | 2.860e-01      | 0.67             | 4.791e-01         | 1.284             |              |                   |                  |
| [ 457,572)                | 28              | 21            | 75.00         | 1.428     | 7.393e-01     | 2.758         | 2.889e-01      | 0.86             | 4.791e-01         | 2.223             |              |                   |                  |
| ≥ 572                     | 25              | 23            | 92.00         | 1.384     | 7.248e-01     | 2.642         | 3.248e-01      | 0.95             | 8.350e-01         | 2.127             |              |                   |                  |
| <b>Quartiles</b>          |                 |               |               |           |               |               |                |                  |                   |                   |              |                   |                  |
| < 359                     | 34              | 24            | 70.59         | ----      | ----          | ----          | ----           | 1.40             | 9.856e-01         | 2.491             | 4.90e-02     | 5.36e-02          | 2.24e-01         |
| [ 359,419)                | 32              | 23            | 71.88         | 7.013e-01 | 3.902e-01     | 1.261         | 2.356e-01      | 1.40             | 8.624e-01         | 4.085             |              |                   |                  |
| [ 419,518)                | 37              | 28            | 75.68         | 1.372     | 7.909e-01     | 2.378         | 2.607e-01      | 0.75             | 4.791e-01         | 1.596             |              |                   |                  |
| ≥ 518                     | 32              | 28            | 87.50         | 1.403     | 8.093e-01     | 2.431         | 2.278e-01      | 0.93             | 6.708e-01         | 1.947             |              |                   |                  |
| <b>Tertiles</b>           |                 |               |               |           |               |               |                |                  |                   |                   |              |                   |                  |
| < 378                     | 46              | 31            | 67.39         | ----      | ----          | ----          | ----           | 1.40             | 9.856e-01         | 2.431             | 3.85e-01     | 3.84e-01          | 8.99e-01         |
| [ 378,480)                | 45              | 34            | 75.56         | 1.150     | 7.002e-01     | 1.889         | 5.808e-01      | 0.75             | 5.749e-01         | 2.034             |              |                   |                  |
| ≥ 480                     | 44              | 38            | 86.36         | 1.397     | 8.661e-01     | 2.252         | 1.706e-01      | 0.94             | 8.350e-01         | 1.947             |              |                   |                  |
| <b>Profile Likelihood</b> |                 |               |               |           |               |               |                |                  |                   |                   |              |                   |                  |
| < 399.5                   | 53              | 37            | 69.81         | ----      | ----          | ----          | ----           | 1.74             | 1.333             | 2.502             | 8.92e-03     | 9.76e-03          | 1.06e-01         |
| ≥ 399.5                   | 82              | 66            | 80.49         | 1.714     | 1.134         | 2.590         | 1.051e-02      | 0.84             | 6.708e-01         | 1.087             |              |                   |                  |
| <b>Quantitative</b>       | 135             | 103           | 76.30         | 1.001     | 1.000         | 1.002         | 1.987e-02      |                  |                   |                   | 2.948e-02    | 1.964e-02         |                  |

Cohort: **Derivation**

Outcome: **Progression Free Survival by CPI ( Lung Transplant is Censored )**

Predictor: **S100A12 ( ng / mL )**

|                           | Patients<br>(N) | Events<br>(n) | Events<br>(%) | HR        | HR<br>95% LCL | HR<br>95% UCL | Wald<br>pvalue | Median<br>(yrs.) | Median<br>95% LCL | Median<br>95% UCL | LR<br>pvalue | Logrank<br>pvalue | DevLIN<br>pvalue |
|---------------------------|-----------------|---------------|---------------|-----------|---------------|---------------|----------------|------------------|-------------------|-------------------|--------------|-------------------|------------------|
| <b>Quintiles</b>          |                 |               |               |           |               |               |                |                  |                   |                   |              |                   |                  |
| < 15                      | 26              | 20            | 76.92         | ----      | ----          | ----          | ----           | 1.71             | 8.433e-01         |                   | 1.41e-02     | 4.09e-03          | 1.21e-02         |
| [ 15,21.6)                | 29              | 20            | 68.97         | 1.253     | 6.704e-01     | 2.343         | 4.793e-01      | 0.98             | 8.624e-01         | 2.491             |              |                   |                  |
| [ 21.6,29)                | 26              | 20            | 76.92         | 1.061     | 5.684e-01     | 1.981         | 8.525e-01      | 1.65             | 9.062e-01         | 2.645             |              |                   |                  |
| [ 29,51)                  | 26              | 22            | 84.62         | 2.883     | 1.535         | 5.416         | 9.960e-04      | 0.66             | 4.983e-01         | 9.336e-01         |              |                   |                  |
| ≥ 51                      | 28              | 21            | 75.00         | 1.239     | 6.653e-01     | 2.309         | 4.991e-01      | 1.40             | 8.378e-01         | 2.664             |              |                   |                  |
| <b>Quartiles</b>          |                 |               |               |           |               |               |                |                  |                   |                   |              |                   |                  |
| < 17.8                    | 34              | 27            | 79.41         | ----      | ----          | ----          | ----           | 1.11             | 8.624e-01         | 2.502             | 3.80e-02     | 2.92e-02          | 3.16e-02         |
| [ 17.8,25)                | 34              | 21            | 61.76         | 8.152e-01 | 4.600e-01     | 1.445         | 4.841e-01      | 1.65             | 9.774e-01         | 3.031             |              |                   |                  |
| [ 25,45.2)                | 34              | 30            | 88.24         | 1.800     | 1.062         | 3.048         | 2.889e-02      | 0.79             | 5.749e-01         | 9.856e-01         |              |                   |                  |
| ≥ 45.2                    | 33              | 25            | 75.76         | 1.197     | 6.895e-01     | 2.077         | 5.232e-01      | 1.28             | 8.378e-01         | 2.606             |              |                   |                  |
| <b>Tertiles</b>           |                 |               |               |           |               |               |                |                  |                   |                   |              |                   |                  |
| < 19                      | 39              | 30            | 76.92         | ----      | ----          | ----          | ----           | 1.11             | 8.624e-01         | 2.341             | 1.99e-01     | 1.82e-01          | 4.78e-02         |
| [ 19,37)                  | 51              | 37            | 72.55         | 9.762e-01 | 6.020e-01     | 1.583         | 9.224e-01      | 1.25             | 9.062e-01         | 2.223             |              |                   |                  |
| ≥ 37                      | 45              | 36            | 80.00         | 1.451     | 8.888e-01     | 2.368         | 1.366e-01      | 0.84             | 6.407e-01         | 1.396             |              |                   |                  |
| <b>Profile Likelihood</b> |                 |               |               |           |               |               |                |                  |                   |                   |              |                   |                  |
| < 25.5                    | 71              | 51            | 71.83         | ----      | ----          | ----          | ----           | 1.65             | 1.035             | 2.223             | 7.47e-03     | 6.55e-03          | 1.05e-03         |
| ≥ 25.5                    | 64              | 52            | 81.25         | 1.713     | 1.157         | 2.536         | 7.160e-03      | 0.84             | 6.407e-01         | 1.246             |              |                   |                  |
| <b>Quantitative</b>       | 135             | 103           | 76.30         | 1.000     | 9.958e-01     | 1.005         | 9.217e-01      |                  |                   |                   | 9.222e-01    | 9.217e-01         |                  |

**Cohort: Derivation**

**Outcome: Progression Free Survival by FVC ( Lung Transplant counts as event )**

**Predictor: Age (years)**

|                           | Patients<br>(N) | Events<br>(n) | Events<br>(%) | HR        | HR<br>95% LCL | HR<br>95% UCL | Wald<br>pvalue | Median<br>(yrs.) | Median<br>95% LCL | Median<br>95% UCL | LR<br>pvalue | Logrank<br>pvalue | DevLIN<br>Pvalue |
|---------------------------|-----------------|---------------|---------------|-----------|---------------|---------------|----------------|------------------|-------------------|-------------------|--------------|-------------------|------------------|
| <b>Quintiles</b>          |                 |               |               |           |               |               |                |                  |                   |                   |              |                   |                  |
| < 59.5                    | 26              | 25            | 96.15         | ----      | ----          | ----          | ----           | 1.06             | 4.408e-01         | 1.925             | 8.39e-01     | 8.39e-01          | 8.25e-01         |
| [ 59.5,66.1)              | 28              | 23            | 82.14         | 9.840e-01 | 5.562e-01     | 1.741         | 9.558e-01      | 0.41             | 3.532e-01         | 1.947             |              |                   |                  |
| [ 66.1,69.7)              | 27              | 24            | 88.89         | 9.023e-01 | 5.142e-01     | 1.584         | 7.202e-01      | 0.86             | 6.324e-01         | 2.034             |              |                   |                  |
| [ 69.7,73.9)              | 26              | 25            | 96.15         | 8.263e-01 | 4.730e-01     | 1.444         | 5.027e-01      | 0.93             | 8.049e-01         | 2.231             |              |                   |                  |
| ≥ 73.9                    | 28              | 25            | 89.29         | 7.502e-01 | 4.294e-01     | 1.311         | 3.128e-01      | 0.94             | 6.133e-01         | 2.606             |              |                   |                  |
| <b>Quartiles</b>          |                 |               |               |           |               |               |                |                  |                   |                   |              |                   |                  |
| < 61.2                    | 33              | 30            | 90.91         | ----      | ----          | ----          | ----           | 1.03             | 5.010e-01         | 1.925             | 3.32e-01     | 3.30e-01          | 5.32e-01         |
| [ 61.2,68.5)              | 34              | 30            | 88.24         | 1.058     | 6.355e-01     | 1.760         | 8.292e-01      | 0.54             | 3.587e-01         | 9.774e-01         |              |                   |                  |
| [ 68.5,73.3)              | 35              | 32            | 91.43         | 6.982e-01 | 4.229e-01     | 1.153         | 1.602e-01      | 1.31             | 8.624e-01         | 2.231             |              |                   |                  |
| ≥ 73.3                    | 33              | 30            | 90.91         | 8.086e-01 | 4.860e-01     | 1.345         | 4.135e-01      | 0.90             | 6.133e-01         | 2.300             |              |                   |                  |
| <b>Tertiles</b>           |                 |               |               |           |               |               |                |                  |                   |                   |              |                   |                  |
| < 64.7                    | 45              | 39            | 86.67         | ----      | ----          | ----          | ----           | 0.86             | 5.010e-01         | 1.717             | 8.71e-01     | 8.74e-01          | 5.90e-03         |
| [ 64.7,71.3)              | 45              | 41            | 91.11         | 1.068     | 6.882e-01     | 1.658         | 7.690e-01      | 0.86             | 5.284e-01         | 1.402             |              |                   |                  |
| ≥ 71.3                    | 45              | 42            | 93.33         | 9.515e-01 | 6.135e-01     | 1.476         | 8.242e-01      | 0.90             | 7.392e-01         | 1.714             |              |                   |                  |
| <b>Profile Likelihood</b> |                 |               |               |           |               |               |                |                  |                   |                   |              |                   |                  |
| <67.9                     | 64              | 58            | 90.62         | ----      | ----          | ----          | ----           | 0.67             | 4.079e-01         | 1.087             | 5.99e-02     | 5.72e-02          | 2.47e-01         |
| ≥67.9                     | 71              | 64            | 90.14         | 7.083e-01 | 4.955e-01     | 1.013         | 5.857e-02      | 0.96             | 8.624e-01         | 1.714             |              |                   |                  |
| <b>Quantitative</b>       |                 |               |               |           |               |               |                |                  |                   |                   |              |                   |                  |
|                           | 135             | 122           | 90.37         | 9.820e-01 | 9.590e-01     | 1.006         | 1.336e-01      |                  |                   |                   | 1.352e-01    | 1.331e-01         |                  |
| <b>Predictor: Gender</b>  |                 |               |               |           |               |               |                |                  |                   |                   |              |                   |                  |
| Female                    | 36              | 30            | 83.33         | ----      | ----          | ----          | ----           | 1.31             | 0.778             | 1.92              |              |                   |                  |
| Male                      | 99              | 92            | 92.93         | 1.29      | 0.852         | 1.954         | 2.29E-01       | 0.84             | 0.701             | 1.05              | 2.20E-01     | 2.27E-01          |                  |

Cohort: **Derivation**

Outcome: **Progression Free Survival by FVC ( Lung Transplant counts as event )**

Predictor: **Baseline (4-month) FVC % Predicted**

|                           | Patients<br>(N) | Events<br>(n) | Events<br>(%) | HR        | HR<br>95% LCL | HR<br>95% UCL | Wald<br>pvalue | Median<br>(yrs.) | Median<br>95% LCL | Median<br>95% UCL | LR<br>pvalue | Logrank<br>pvalue | DevLIN<br>Pvalue |
|---------------------------|-----------------|---------------|---------------|-----------|---------------|---------------|----------------|------------------|-------------------|-------------------|--------------|-------------------|------------------|
| <b>Quintiles</b>          |                 |               |               |           |               |               |                |                  |                   |                   |              |                   |                  |
| < 43.3                    | 24              | 23            | 95.83         | ----      | ----          | ----          | ----           | 0.33             | 1.533e-01         | 8.378e-01         | 9.88e-06     | 1.25e-05          | 3.84e-02         |
| [ 43.3,56.6)              | 24              | 22            | 91.67         | 5.288e-01 | 2.928e-01     | 9.548e-01     | 3.457e-02      | 0.76             | 4.081e-01         | 2.086             |              |                   |                  |
| [ 56.6,66)                | 23              | 19            | 82.61         | 5.030e-01 | 2.709e-01     | 9.339e-01     | 2.951e-02      | 0.72             | 4.983e-01         | 1.311             |              |                   |                  |
| [ 66,77)                  | 22              | 21            | 95.45         | 6.322e-01 | 3.488e-01     | 1.146         | 1.306e-01      | 0.86             | 5.749e-01         | 1.402             |              |                   |                  |
| ≥ 77                      | 25              | 21            | 84.00         | 1.889e-01 | 9.781e-02     | 3.649e-01     | 6.970e-07      | 2.23             | 1.273             | 4.153             |              |                   |                  |
| <b>Quartiles</b>          |                 |               |               |           |               |               |                |                  |                   |                   |              |                   |                  |
| < 47.8                    | 30              | 29            | 96.67         | ----      | ----          | ----          | ----           | 0.34             | 2.300e-01         | 7.940e-01         | 1.69e-05     | 1.04e-05          | 8.11e-02         |
| [ 47.8,61.1)              | 30              | 27            | 90.00         | 5.619e-01 | 3.310e-01     | 9.538e-01     | 3.273e-02      | 0.82             | 4.873e-01         | 1.925             |              |                   |                  |
| [ 61.1,74)                | 28              | 24            | 85.71         | 5.072e-01 | 2.920e-01     | 8.811e-01     | 1.597e-02      | 0.91             | 6.133e-01         | 1.402             |              |                   |                  |
| ≥ 74                      | 30              | 26            | 86.67         | 2.365e-01 | 1.321e-01     | 4.233e-01     | 1.211e-06      | 1.97             | 1.112             | 4.044             |              |                   |                  |
| <b>Tertiles</b>           |                 |               |               |           |               |               |                |                  |                   |                   |              |                   |                  |
| < 52.8                    | 40              | 38            | 95.00         | ----      | ----          | ----          | ----           | 0.41             | 3.258e-01         | 8.378e-01         | 4.28e-05     | 2.79e-05          | 3.57e-01         |
| [ 52.8,69.9)              | 40              | 34            | 85.00         | 6.042e-01 | 3.780e-01     | 9.658e-01     | 3.524e-02      | 0.86             | 6.133e-01         | 1.311             |              |                   |                  |
| ≥ 69.9                    | 38              | 34            | 89.47         | 3.226e-01 | 1.955e-01     | 5.324e-01     | 9.585e-06      | 1.40             | 1.112             | 2.970             |              |                   |                  |
| <b>Profile Likelihood</b> |                 |               |               |           |               |               |                |                  |                   |                   |              |                   |                  |
| < 76.9                    | 93              | 85            | 91.40         | ----      | ----          | ----          | ----           | 0.71             | 5.010e-01         | 9.008e-01         | 1.92e-06     | 7.05e-06          | 1.60e-02         |
| ≥ 76.9                    | 25              | 21            | 84.00         | 3.103e-01 | 1.821e-01     | 5.290e-01     | 1.702e-05      | 2.23             | 1.273             | 4.153             |              |                   |                  |
| <b>Quantitative</b>       | 118             | 106           | 89.83         | 9.774e-01 | 9.671e-01     | 9.879e-01     | 2.565e-05      |                  |                   |                   | 1.703e-05    | 2.371e-05         |                  |

Cohort: **Derivation**

Outcome: **Progression Free Survival by FVC ( Lung Transplant counts as event )**

Predictor: **Baseline (4-month) DLco % Predicted**

|                           | Patients<br>(N) | Events<br>(n) | Events<br>(%) | HR        | HR<br>95% LCL | HR<br>95% UCL | Wald<br>pvalue | Median<br>(yrs.) | Median<br>95% LCL | Median<br>95% UCL | LR<br>pvalue | Logrank<br>pvalue | DevLIN<br>pvalue |
|---------------------------|-----------------|---------------|---------------|-----------|---------------|---------------|----------------|------------------|-------------------|-------------------|--------------|-------------------|------------------|
| <b>Quintiles</b>          |                 |               |               |           |               |               |                |                  |                   |                   |              |                   |                  |
| < 28.9                    | 21              | 20            | 95.24         | ----      | ----          | ----          | ----           | 0.58             | 9.035e-02         | 9.500e-01         | 2.02e-06     | 1.61e-06          | 2.14e-01         |
| [ 28.9,39)                | 22              | 20            | 90.91         | 9.643e-01 | 5.166e-01     | 1.800         | 9.091e-01      | 0.41             | 2.683e-01         | 1.112             |              |                   |                  |
| [ 39,49.4)                | 21              | 19            | 90.48         | 5.082e-01 | 2.698e-01     | 9.574e-01     | 3.618e-02      | 0.98             | 6.708e-01         | 2.078             |              |                   |                  |
| [ 49.4,60)                | 20              | 18            | 90.00         | 3.957e-01 | 2.050e-01     | 7.636e-01     | 5.711e-03      | 1.14             | 8.049e-01         | 2.086             |              |                   |                  |
| ≥ 60                      | 22              | 17            | 77.27         | 1.737e-01 | 8.361e-02     | 3.608e-01     | 2.687e-06      | 2.53             | 1.273             |                   |              |                   |                  |
| <b>Quartiles</b>          |                 |               |               |           |               |               |                |                  |                   |                   |              |                   |                  |
| < 31.6                    | 26              | 25            | 96.15         | ----      | ----          | ----          | ----           | 0.80             | 2.300e-01         | 9.582e-01         | 2.39e-06     | 1.37e-06          | 1.06e-01         |
| [ 31.6,43.8)              | 27              | 25            | 92.59         | 1.176     | 6.733e-01     | 2.053         | 5.692e-01      | 0.41             | 2.930e-01         | 1.087             |              |                   |                  |
| [ 43.8,57)                | 25              | 22            | 88.00         | 4.637e-01 | 2.584e-01     | 8.322e-01     | 1.001e-02      | 1.34             | 8.049e-01         | 2.086             |              |                   |                  |
| ≥ 57                      | 28              | 22            | 78.57         | 2.635e-01 | 1.407e-01     | 4.933e-01     | 3.075e-05      | 2.36             | 1.144             | 4.616             |              |                   |                  |
| <b>Tertiles</b>           |                 |               |               |           |               |               |                |                  |                   |                   |              |                   |                  |
| < 36.6                    | 35              | 33            | 94.29         | ----      | ----          | ----          | ----           | 0.41             | 2.546e-01         | 9.008e-01         | 1.00e-05     | 2.97e-06          | 9.73e-01         |
| [ 36.6,53.4)              | 37              | 33            | 89.19         | 4.825e-01 | 2.955e-01     | 7.878e-01     | 3.577e-03      | 1.10             | 7.392e-01         | 1.717             |              |                   |                  |
| ≥ 53.4                    | 34              | 28            | 82.35         | 2.631e-01 | 1.521e-01     | 4.552e-01     | 1.802e-06      | 1.99             | 1.112             | 3.261             |              |                   |                  |
| <b>Profile Likelihood</b> |                 |               |               |           |               |               |                |                  |                   |                   |              |                   |                  |
| <43.9                     | 54              | 51            | 94.44         | ----      | ----          | ----          | ----           | 0.63             | 3.751e-01         | 9.062e-01         | 2.13e-07     | 7.51e-08          | 8.42e-02         |
| ≥43.9                     | 52              | 43            | 82.69         | 3.119e-01 | 1.998e-01     | 4.868e-01     | 2.909e-07      | 1.92             | 1.144             | 2.491             |              |                   |                  |
| <b>Quantitative</b>       |                 |               |               |           |               |               |                |                  |                   |                   |              |                   |                  |
|                           | 106             | 94            | 88.68         | 9.662e-01 | 9.534e-01     | 9.791e-01     | 3.859e-07      |                  |                   |                   | 2.972e-07    | 2.564e-07         |                  |

**Cohort: Derivation**  
**Outcome: Progression Free Survival by FVC ( Lung Transplant counts as event )**  
**Predictor: Baseline (4-month) CPI**

|                           | Patients<br>(N) | Events<br>(n) | Events<br>(%) | HR    | HR<br>95% LCL | HR<br>95% UCL | Wald<br>pvalue | Median<br>(yrs.) | Median<br>95% LCL | Median<br>95% UCL | LR<br>pvalue | Logrank<br>pvalue | DevLIN<br>pvalue |
|---------------------------|-----------------|---------------|---------------|-------|---------------|---------------|----------------|------------------|-------------------|-------------------|--------------|-------------------|------------------|
| <b>Quintiles</b>          |                 |               |               |       |               |               |                |                  |                   |                   |              |                   |                  |
| < 43                      | 22              | 18            | 81.82         | ----  | ----          | ----          | ----           | 2.36             | 1.333             | 5.202             | 1.72e-06     | 4.22e-07          | 4.80e-01         |
| [ 43,50.8)                | 20              | 17            | 85.00         | 1.513 | 7.542e-01     | 3.035         | 2.437e-01      | 1.14             | 9.199e-01         | 4.044             |              |                   |                  |
| [ 50.8,58.7)              | 21              | 19            | 90.48         | 2.680 | 1.328         | 5.407         | 5.922e-03      | 1.11             | 6.133e-01         | 2.012             |              |                   |                  |
| [ 58.7,64.5)              | 22              | 20            | 90.91         | 4.164 | 2.075         | 8.353         | 5.939e-05      | 0.67             | 2.930e-01         | 9.582e-01         |              |                   |                  |
| ≥ 64.5                    | 21              | 20            | 95.24         | 5.973 | 2.934         | 1.216e+01     | 8.271e-07      | 0.33             | 8.761e-02         | 9.062e-01         |              |                   |                  |
| <b>Quartiles</b>          |                 |               |               |       |               |               |                |                  |                   |                   |              |                   |                  |
| < 44.4                    | 25              | 20            | 80.00         | ----  | ----          | ----          | ----           | 2.36             | 1.273             | 4.616             | 2.15e-07     | 1.04e-08          | 1.67e-01         |
| [ 44.4,56)                | 27              | 24            | 88.89         | 1.848 | 9.904e-01     | 3.450         | 5.363e-02      | 1.09             | 7.392e-01         | 2.034             |              |                   |                  |
| [ 56,62.7)                | 27              | 24            | 88.89         | 2.760 | 1.452         | 5.246         | 1.939e-03      | 0.96             | 6.708e-01         | 1.572             |              |                   |                  |
| ≥ 62.7                    | 27              | 26            | 96.30         | 6.628 | 3.440         | 1.277e+01     | 1.591e-08      | 0.33             | 1.477e-01         | 8.241e-01         |              |                   |                  |
| <b>Tertiles</b>           |                 |               |               |       |               |               |                |                  |                   |                   |              |                   |                  |
| < 47.7                    | 34              | 28            | 82.35         | ----  | ----          | ----          | ----           | 1.99             | 1.273             | 3.274             | 1.50e-07     | 1.43e-08          | 1.57e-01         |
| [ 47.7,59.8)              | 37              | 32            | 86.49         | 1.948 | 1.142         | 3.324         | 1.438e-02      | 1.11             | 7.173e-01         | 1.925             |              |                   |                  |
| ≥ 59.8                    | 35              | 34            | 97.14         | 4.858 | 2.786         | 8.470         | 2.513e-08      | 0.38             | 2.546e-01         | 8.241e-01         |              |                   |                  |
| <b>Profile Likelihood</b> |                 |               |               |       |               |               |                |                  |                   |                   |              |                   |                  |
| <60.3                     | 74              | 63            | 85.14         | ----  | ----          | ----          | ----           | 1.33             | 1.087             | 2.012             | 5.40e-08     | 5.09e-10          | 2.22e-02         |
| ≥60.3                     | 32              | 31            | 96.88         | 4.079 | 2.536         | 6.562         | 6.761e-09      | 0.33             | 2.300e-01         | 7.775e-01         |              |                   |                  |
| <b>Quantitative</b>       | 106             | 94            | 88.68         | 1.049 | 1.030         | 1.067         | 1.056e-07      |                  |                   |                   | 8.159e-08    | 1.003e-07         |                  |



**Cohort: Derivation**  
**Outcome: Progression Free Survival by FVC ( Lung Transplant counts as event )**  
**Predictor: Baseline (3-month) FVC % Predicted**

|                           | Patients<br>(N) | Events<br>(n) | Events<br>(%) | HR        | HR<br>95% LCL | HR<br>95% UCL | Wald<br>pvalue | Median<br>(yrs.) | Median<br>95% LCL | Median<br>95% UCL | LR<br>pvalue | Logrank<br>pvalue | DevLIN<br>pvalue |
|---------------------------|-----------------|---------------|---------------|-----------|---------------|---------------|----------------|------------------|-------------------|-------------------|--------------|-------------------|------------------|
| <b>Quintiles</b>          |                 |               |               |           |               |               |                |                  |                   |                   |              |                   |                  |
| < 43.1                    | 22              | 21            | 95.45         | ----      | ----          | ----          | ----           | 0.28             | 1.477e-01         | 8.598e-01         | 3.11e-05     | 4.57e-05          | 1.28e-01         |
| [ 43.1,56.5)              | 21              | 19            | 90.48         | 6.086e-01 | 3.256e-01     | 1.138         | 1.197e-01      | 0.70             | 3.587e-01         | 2.012             |              |                   |                  |
| [ 56.5,65.7)              | 22              | 18            | 81.82         | 4.950e-01 | 2.610e-01     | 9.389e-01     | 3.131e-02      | 0.72             | 3.751e-01         | 1.925             |              |                   |                  |
| [ 65.7,76.7)              | 19              | 18            | 94.74         | 6.164e-01 | 3.273e-01     | 1.161         | 1.341e-01      | 0.86             | 4.791e-01         | 1.947             |              |                   |                  |
| ≥ 76.7                    | 22              | 18            | 81.82         | 1.865e-01 | 9.248e-02     | 3.762e-01     | 2.717e-06      | 2.23             | 1.273             | 5.202             |              |                   |                  |
| <b>Quartiles</b>          |                 |               |               |           |               |               |                |                  |                   |                   |              |                   |                  |
| < 47.8                    | 27              | 26            | 96.30         | ----      | ----          | ----          | ----           | 0.33             | 1.697e-01         | 6.708e-01         | 9.76e-06     | 6.00e-06          | 4.76e-02         |
| [ 47.8,60.5)              | 27              | 24            | 88.89         | 5.485e-01 | 3.132e-01     | 9.605e-01     | 3.565e-02      | 0.74             | 4.081e-01         | 1.717             |              |                   |                  |
| [ 60.5,73.4)              | 27              | 23            | 85.19         | 4.607e-01 | 2.592e-01     | 8.190e-01     | 8.281e-03      | 0.86             | 5.749e-01         | 1.402             |              |                   |                  |
| ≥ 73.4                    | 25              | 21            | 84.00         | 2.006e-01 | 1.057e-01     | 3.808e-01     | 8.925e-07      | 2.08             | 1.144             | 4.616             |              |                   |                  |
| <b>Tertiles</b>           |                 |               |               |           |               |               |                |                  |                   |                   |              |                   |                  |
| < 52.4                    | 36              | 34            | 94.44         | ----      | ----          | ----          | ----           | 0.33             | 2.300e-01         | 7.392e-01         | 5.18e-05     | 2.90e-05          | 4.59e-01         |
| [ 52.4,69.6)              | 36              | 30            | 83.33         | 5.666e-01 | 3.445e-01     | 9.319e-01     | 2.525e-02      | 0.86             | 4.983e-01         | 1.311             |              |                   |                  |
| ≥ 69.6                    | 34              | 30            | 88.24         | 3.021e-01 | 1.773e-01     | 5.146e-01     | 1.062e-05      | 1.67             | 1.144             | 3.031             |              |                   |                  |
| <b>Profile Likelihood</b> |                 |               |               |           |               |               |                |                  |                   |                   |              |                   |                  |
| < 76.7                    | 84              | 76            | 90.48         | ----      | ----          | ----          | ----           | 0.63             | 4.517e-01         | 9.008e-01         | 4.18e-06     | 1.50e-05          | 3.03e-02         |
| ≥ 76.7                    | 22              | 18            | 81.82         | 2.965e-01 | 1.664e-01     | 5.282e-01     | 3.682e-05      | 2.23             | 1.273             | 5.202             |              |                   |                  |
| <b>Quantitative</b>       | 106             | 94            | 88.68         | 9.760e-01 | 9.652e-01     | 9.870e-01     | 2.027e-05      |                  |                   |                   | 1.378e-05    | 1.902e-05         |                  |

**Cohort: Derivation**

**Outcome: Progression Free Survival by FVC ( Lung Transplant counts as event )**

**Predictor: Baseline (3-month) DLco % Predicted**

|                           | Patients<br>(N) | Events<br>(n) | Events<br>(%) | HR        | HR<br>95% LCL | HR<br>95% UCL | Wald<br>pvalue | Median<br>(yrs.) | Median<br>95% LCL | Median<br>95% UCL | LR<br>pvalue | Logrank<br>pvalue | DevLIN<br>pvalue |
|---------------------------|-----------------|---------------|---------------|-----------|---------------|---------------|----------------|------------------|-------------------|-------------------|--------------|-------------------|------------------|
| <b>Quintiles</b>          |                 |               |               |           |               |               |                |                  |                   |                   |              |                   |                  |
| < 28.6                    | 18              | 18            | 100.00        | ----      | ----          | ----          | ----           | 0.31             | 8.761e-02         | 9.500e-01         | 2.61e-06     | 1.70e-06          | 1.33e-01         |
| [ 28.6,38)                | 18              | 15            | 83.33         | 9.860e-01 | 4.926e-01     | 1.974         | 9.683e-01      | 0.33             | 1.834e-01         | 1.402             |              |                   |                  |
| [ 38,49.9)                | 20              | 18            | 90.00         | 5.090e-01 | 2.639e-01     | 9.818e-01     | 4.393e-02      | 0.98             | 6.708e-01         | 1.925             |              |                   |                  |
| [ 49.9,61)                | 18              | 16            | 88.89         | 3.911e-01 | 1.967e-01     | 7.777e-01     | 7.436e-03      | 1.14             | 7.173e-01         | 2.357             |              |                   |                  |
| ≥ 61                      | 20              | 15            | 75.00         | 1.534e-01 | 6.990e-02     | 3.365e-01     | 2.908e-06      | 3.10             | 1.273             |                   |              |                   |                  |
| <b>Quartiles</b>          |                 |               |               |           |               |               |                |                  |                   |                   |              |                   |                  |
| < 31.4                    | 23              | 22            | 95.65         | ----      | ----          | ----          | ----           | 0.67             | 1.697e-01         | 1.402             | 1.19e-06     | 1.08e-06          | 5.22e-02         |
| [ 31.4,41.3)              | 24              | 22            | 91.67         | 1.353     | 7.425e-01     | 2.464         | 3.235e-01      | 0.41             | 2.683e-01         | 9.774e-01         |              |                   |                  |
| [ 41.3,57.2)              | 23              | 20            | 86.96         | 5.453e-01 | 2.953e-01     | 1.007         | 5.256e-02      | 1.14             | 6.708e-01         | 2.012             |              |                   |                  |
| ≥ 57.2                    | 24              | 18            | 75.00         | 2.275e-01 | 1.136e-01     | 4.557e-01     | 2.957e-05      | 2.53             | 1.273             |                   |              |                   |                  |
| <b>Tertiles</b>           |                 |               |               |           |               |               |                |                  |                   |                   |              |                   |                  |
| < 34.5                    | 31              | 29            | 93.55         | ----      | ----          | ----          | ----           | 0.38             | 2.300e-01         | 9.062e-01         | 2.13e-05     | 1.32e-05          | 8.23e-01         |
| [ 34.5,54.3)              | 32              | 28            | 87.50         | 5.835e-01 | 3.458e-01     | 9.846e-01     | 4.358e-02      | 0.86             | 6.133e-01         | 1.717             |              |                   |                  |
| ≥ 54.3                    | 31              | 25            | 80.65         | 2.585e-01 | 1.439e-01     | 4.642e-01     | 5.937e-06      | 2.36             | 1.054             | 3.274             |              |                   |                  |
| <b>Profile Likelihood</b> |                 |               |               |           |               |               |                |                  |                   |                   |              |                   |                  |
| <43.9                     | 49              | 46            | 93.88         | ----      | ----          | ----          | ----           | 0.45             | 2.930e-01         | 9.008e-01         | 2.94e-07     | 1.16e-07          | 9.13e-02         |
| ≥43.9                     | 45              | 36            | 80.00         | 2.883e-01 | 1.775e-01     | 4.683e-01     | 5.039e-07      | 1.95             | 1.144             | 3.105             |              |                   |                  |
| <b>Quantitative</b>       |                 |               |               |           |               |               |                |                  |                   |                   |              |                   |                  |
|                           | 94              | 82            | 87.23         | 9.655e-01 | 9.522e-01     | 9.790e-01     | 6.947e-07      |                  |                   |                   | 5.349e-07    | 3.905e-07         |                  |

**Cohort: Derivation**  
**Outcome: Progression Free Survival by FVC ( Lung Transplant counts as event )**  
**Predictor: Baseline (3-month) CPI**

|                           | Patients<br>(N) | Events<br>(n) | Events<br>(%) | HR    | HR<br>95% LCL | HR<br>95% UCL | Wald<br>pvalue | Median<br>(yrs.) | Median<br>95% LCL | Median<br>95% UCL | LR<br>pvalue | Logrank<br>pvalue | DevLIN<br>pvalue |
|---------------------------|-----------------|---------------|---------------|-------|---------------|---------------|----------------|------------------|-------------------|-------------------|--------------|-------------------|------------------|
| <b>Quintiles</b>          |                 |               |               |       |               |               |                |                  |                   |                   |              |                   |                  |
| < 42.8                    | 19              | 15            | 78.95         | ----  | ----          | ----          | ----           | 2.36             | 1.333             |                   | 2.38e-06     | 8.22e-07          | 5.00e-01         |
| [ 42.8,51.5)              | 18              | 15            | 83.33         | 1.656 | 7.726e-01     | 3.551         | 1.947e-01      | 1.14             | 8.624e-01         |                   |              |                   |                  |
| [ 51.5,59)                | 19              | 16            | 84.21         | 2.960 | 1.354         | 6.472         | 6.560e-03      | 1.11             | 4.517e-01         | 2.012             |              |                   |                  |
| [ 59,65.1)                | 19              | 18            | 94.74         | 5.285 | 2.439         | 1.145e+01     | 2.453e-05      | 0.54             | 2.683e-01         | 9.500e-01         |              |                   |                  |
| ≥ 65.1                    | 19              | 18            | 94.74         | 6.365 | 2.921         | 1.387e+01     | 3.212e-06      | 0.33             | 8.761e-02         | 9.391e-01         |              |                   |                  |
| <b>Quartiles</b>          |                 |               |               |       |               |               |                |                  |                   |                   |              |                   |                  |
| < 44.3                    | 23              | 19            | 82.61         | ----  | ----          | ----          | ----           | 2.36             | 1.273             | 4.616             | 1.10e-06     | 1.29e-07          | 4.76e-01         |
| [ 44.3,56.1)              | 24              | 19            | 79.17         | 1.591 | 8.155e-01     | 3.104         | 1.733e-01      | 1.17             | 7.173e-01         | 3.261             |              |                   |                  |
| [ 56.1,62.8)              | 24              | 22            | 91.67         | 3.336 | 1.697         | 6.558         | 4.751e-04      | 0.67             | 5.010e-01         | 1.342             |              |                   |                  |
| ≥ 62.8                    | 23              | 22            | 95.65         | 6.049 | 3.038         | 1.204e+01     | 3.022e-07      | 0.23             | 9.035e-02         | 9.008e-01         |              |                   |                  |
| <b>Tertiles</b>           |                 |               |               |       |               |               |                |                  |                   |                   |              |                   |                  |
| < 47.6                    | 31              | 25            | 80.65         | ----  | ----          | ----          | ----           | 2.08             | 1.144             | 3.274             | 1.04e-07     | 6.05e-09          | 1.12e-01         |
| [ 47.6,59.9)              | 32              | 27            | 84.38         | 1.978 | 1.116         | 3.507         | 1.953e-02      | 0.98             | 6.324e-01         | 1.925             |              |                   |                  |
| ≥ 59.9                    | 31              | 30            | 96.77         | 5.671 | 3.097         | 1.038e+01     | 1.872e-08      | 0.33             | 1.697e-01         | 7.392e-01         |              |                   |                  |
| <b>Profile Likelihood</b> |                 |               |               |       |               |               |                |                  |                   |                   |              |                   |                  |
| <59.8                     | 62              | 51            | 82.26         | ----  | ----          | ----          | ----           | 1.34             | 1.087             | 2.078             | 7.59e-08     | 1.49e-09          | 3.29e-02         |
| ≥59.8                     | 32              | 31            | 96.88         | 4.182 | 2.542         | 6.879         | 1.755e-08      | 0.31             | 2.300e-01         | 7.091e-01         |              |                   |                  |
| <b>Quantitative</b>       | 94              | 82            | 87.23         | 1.051 | 1.032         | 1.070         | 1.290e-07      |                  |                   |                   | 1.048e-07    | 1.074e-07         |                  |

**Cohort: Derivation**

**Outcome: Progression Free Survival by FVC ( Lung Transplant counts as event )**

**Predictor: MMP7 ( ng / mL )**

|                           | Patients<br>(N) | Events<br>(n) | Events<br>(%) | HR        | HR<br>95% LCL | HR<br>95% UCL | Wald<br>pvalue | Median<br>(yrs.) | Median<br>95% LCL | Median<br>95% UCL | LR<br>pvalue | Logrank<br>pvalue | DevLIN<br>pvalue |
|---------------------------|-----------------|---------------|---------------|-----------|---------------|---------------|----------------|------------------|-------------------|-------------------|--------------|-------------------|------------------|
| <b>Quintiles</b>          |                 |               |               |           |               |               |                |                  |                   |                   |              |                   |                  |
| < 2.7                     | 26              | 24            | 92.31         | ----      | ----          | ----          | ----           | 1.13             | 4.983e-01         | 2.431             | 1.71e-02     | 1.19e-02          | 6.51e-02         |
| [ 2.7,3.76)               | 23              | 20            | 86.96         | 6.865e-01 | 3.780e-01     | 1.247         | 2.168e-01      | 1.72             | 9.062e-01         | 3.031             |              |                   |                  |
| [ 3.76,4.99)              | 27              | 23            | 85.19         | 9.159e-01 | 5.143e-01     | 1.631         | 7.654e-01      | 0.84             | 4.791e-01         | 2.300             |              |                   |                  |
| [ 4.99,6.41)              | 26              | 25            | 96.15         | 1.886     | 1.068         | 3.331         | 2.871e-02      | 0.50             | 2.683e-01         | 1.054             |              |                   |                  |
| ≥ 6.41                    | 26              | 23            | 88.46         | 1.327     | 7.412e-01     | 2.376         | 3.410e-01      | 0.88             | 6.324e-01         | 2.086             |              |                   |                  |
| <b>Quartiles</b>          |                 |               |               |           |               |               |                |                  |                   |                   |              |                   |                  |
| < 2.92                    | 32              | 29            | 90.62         | ----      | ----          | ----          | ----           | 1.27             | 9.199e-01         | 2.606             | 2.91e-02     | 2.67e-02          | 1.76e-01         |
| [ 2.92,4.3)               | 30              | 26            | 86.67         | 1.033     | 6.070e-01     | 1.757         | 9.054e-01      | 0.91             | 7.392e-01         | 2.491             |              |                   |                  |
| [ 4.3,5.73)               | 33              | 30            | 90.91         | 1.711     | 1.018         | 2.875         | 4.261e-02      | 0.67             | 4.791e-01         | 1.402             |              |                   |                  |
| ≥ 5.73                    | 33              | 30            | 90.91         | 1.918     | 1.127         | 3.265         | 1.644e-02      | 0.82             | 3.751e-01         | 1.087             |              |                   |                  |
| <b>Tertiles</b>           |                 |               |               |           |               |               |                |                  |                   |                   |              |                   |                  |
| < 3.51                    | 43              | 38            | 88.37         | ----      | ----          | ----          | ----           | 1.34             | 9.199e-01         | 2.491             | 2.77e-02     | 2.93e-02          | 2.37e-01         |
| [ 3.51,5.35)              | 42              | 38            | 90.48         | 1.532     | 9.744e-01     | 2.407         | 6.468e-02      | 0.74             | 5.010e-01         | 1.112             |              |                   |                  |
| ≥ 5.35                    | 43              | 39            | 90.70         | 1.822     | 1.148         | 2.892         | 1.085e-02      | 0.84             | 4.517e-01         | 1.588             |              |                   |                  |
| <b>Profile Likelihood</b> |                 |               |               |           |               |               |                |                  |                   |                   |              |                   |                  |
| < 4.4                     | 66              | 58            | 87.88         | ----      | ----          | ----          | ----           | 1.27             | 8.624e-01         | 2.275             | 1.42e-04     | 1.05e-04          | 8.16e-04         |
| ≥ 4.4                     | 62              | 57            | 91.94         | 2.149     | 1.449         | 3.186         | 1.423e-04      | 0.67             | 4.791e-01         | 9.500e-01         |              |                   |                  |
| <b>Quantitative</b>       | 128             | 115           | 89.84         | 1.068     | 1.006         | 1.134         | 3.009e-02      |                  |                   |                   | 3.779e-02    | 2.975e-02         |                  |

Cohort: Derivation

Outcome: Progression Free Survival by FVC ( Lung Transplant counts as event )

Predictor: ICAM1 ( ng / mL )

|                           | Patients<br>(N) | Events<br>(n) | Events<br>(%) | HR        | HR<br>95% LCL | HR<br>95% UCL | Wald<br>pvalue | Median<br>(yrs.) | Median<br>95% LCL | Median<br>95% UCL | LR<br>pvalue | Logrank<br>pvalue | DevLIN<br>pvalue |
|---------------------------|-----------------|---------------|---------------|-----------|---------------|---------------|----------------|------------------|-------------------|-------------------|--------------|-------------------|------------------|
| <b>Quintiles</b>          |                 |               |               |           |               |               |                |                  |                   |                   |              |                   |                  |
| < 158                     | 27              | 24            | 88.89         | ----      | ----          | ----          | ----           | 1.11             | 9.199e-01         | 2.357             | 1.14e-01     | 9.35e-02          | 1.24e-01         |
| [ 158,205)                | 26              | 22            | 84.62         | 9.470e-01 | 5.273e-01     | 1.701         | 8.552e-01      | 1.16             | 7.392e-01         | 2.300             |              |                   |                  |
| [ 205,252)                | 27              | 24            | 88.89         | 1.443     | 8.182e-01     | 2.546         | 2.051e-01      | 0.61             | 3.614e-01         | 2.491             |              |                   |                  |
| [ 252,351)                | 27              | 26            | 96.30         | 1.903     | 1.084         | 3.341         | 2.497e-02      | 0.62             | 4.081e-01         | 1.112             |              |                   |                  |
| ≥ 351                     | 28              | 26            | 92.86         | 1.160     | 6.620e-01     | 2.033         | 6.038e-01      | 0.86             | 7.775e-01         | 2.012             |              |                   |                  |
| <b>Quartiles</b>          |                 |               |               |           |               |               |                |                  |                   |                   |              |                   |                  |
| < 175                     | 32              | 29            | 90.62         | ----      | ----          | ----          | ----           | 1.05             | 9.199e-01         | 2.300             | 5.17e-01     | 5.34e-01          | 5.41e-01         |
| [ 175,230)                | 35              | 31            | 88.57         | 1.367     | 8.210e-01     | 2.277         | 2.293e-01      | 0.74             | 4.517e-01         | 1.572             |              |                   |                  |
| [ 230,318)                | 33              | 29            | 87.88         | 1.416     | 8.446e-01     | 2.376         | 1.869e-01      | 0.67             | 4.079e-01         | 2.078             |              |                   |                  |
| ≥ 318                     | 35              | 33            | 94.29         | 1.311     | 7.928e-01     | 2.167         | 2.916e-01      | 0.86             | 5.284e-01         | 1.717             |              |                   |                  |
| <b>Tertiles</b>           |                 |               |               |           |               |               |                |                  |                   |                   |              |                   |                  |
| < 197                     | 46              | 40            | 86.96         | ----      | ----          | ----          | ----           | 1.13             | 9.199e-01         | 2.127             | 8.25e-02     | 8.84e-02          | 1.41e-01         |
| [ 197,274)                | 43              | 39            | 90.70         | 1.571     | 1.006         | 2.452         | 4.695e-02      | 0.70             | 4.079e-01         | 1.333             |              |                   |                  |
| ≥ 274                     | 46              | 43            | 93.48         | 1.489     | 9.653e-01     | 2.298         | 7.180e-02      | 0.84             | 4.983e-01         | 1.402             |              |                   |                  |
| <b>Profile Likelihood</b> |                 |               |               |           |               |               |                |                  |                   |                   |              |                   |                  |
| <202.5                    | 50              | 43            | 86.00         | ----      | ----          | ----          | ----           | 1.14             | 9.199e-01         | 2.127             | 1.12e-02     | 1.21e-02          | 1.49e-02         |
| ≥202.5                    | 85              | 79            | 92.94         | 1.608     | 1.106         | 2.337         | 1.280e-02      | 0.75             | 4.983e-01         | 9.391e-01         |              |                   |                  |
| <b>Quantitative</b>       | 135             | 122           | 90.37         | 1.001     | 9.995e-01     | 1.002         | 2.503e-01      |                  |                   |                   | 2.609e-01    | 2.500e-01         |                  |

Cohort: **Derivation**

Outcome: **Progression Free Survival by FVC ( Lung Transplant counts as event )**

Predictor: **IL8 ( ng / mL )**

|                           | Patients<br>(N) | Events<br>(n) | Events<br>(%) | HR        | HR<br>95% LCL | HR<br>95% UCL | Wald<br>pvalue | Median<br>(yrs.) | Median<br>95% LCL | Median<br>95% UCL | LR<br>pvalue | Logrank<br>pvalue | DevLIN<br>pvalue |
|---------------------------|-----------------|---------------|---------------|-----------|---------------|---------------|----------------|------------------|-------------------|-------------------|--------------|-------------------|------------------|
| <b>Quintiles</b>          |                 |               |               |           |               |               |                |                  |                   |                   |              |                   |                  |
| < 0.0051                  | 25              | 23            | 92.00         | ----      | ----          | ----          | ----           | 1.05             | 7.392e-01         | 2.357             | 1.03e-02     | 7.58e-03          | 5.95e-04         |
| [ 0.0051,0.00776)         | 27              | 22            | 81.48         | 1.844     | 1.048         | 3.244         | 3.368e-02      | 1.92             | 1.029             | 3.261             |              |                   |                  |
| [ 0.00776,0.00968)        | 28              | 25            | 89.29         | 6.745e-01 | 3.747e-01     | 1.214         | 1.890e-01      | 0.79             | 4.079e-01         | 2.275             |              |                   |                  |
| [ 0.00968,0.013)          | 27              | 26            | 96.30         | 9.699e-01 | 5.483e-01     | 1.716         | 9.164e-01      | 0.84             | 6.708e-01         | 1.342             |              |                   |                  |
| ≥ 0.013                   | 28              | 26            | 92.86         | 1.358     | 7.716e-01     | 2.388         | 2.889e-01      | 0.36             | 1.477e-01         | 9.391e-01         |              |                   |                  |
| <b>Quartiles</b>          |                 |               |               |           |               |               |                |                  |                   |                   |              |                   |                  |
| < 0.0056                  | 32              | 29            | 90.62         | ----      | ----          | ----          | ----           | 1.11             | 7.392e-01         | 2.357             | 1.91e-03     | 1.52e-03          | 2.08e-04         |
| [ 0.0056,0.0087)          | 31              | 25            | 80.65         | 1.896     | 1.168         | 3.078         | 9.678e-03      | 1.92             | 1.029             | 2.530             |              |                   |                  |
| [ 0.0087,0.011)           | 29              | 28            | 96.55         | 7.455e-01 | 4.359e-01     | 1.275         | 2.833e-01      | 0.67             | 4.517e-01         | 8.598e-01         |              |                   |                  |
| ≥ 0.011                   | 43              | 40            | 93.02         | 1.375     | 8.145e-01     | 2.321         | 2.334e-01      | 0.61             | 2.491e-01         | 9.391e-01         |              |                   |                  |
| <b>Tertiles</b>           |                 |               |               |           |               |               |                |                  |                   |                   |              |                   |                  |
| < 0.0066                  | 41              | 36            | 87.80         | ----      | ----          | ----          | ----           | 1.27             | 9.199e-01         | 2.231             | 8.03e-03     | 5.17e-03          | 1.33e-03         |
| [ 0.0066,0.00997)         | 48              | 43            | 89.58         | 1.055     | 6.744e-01     | 1.650         | 8.153e-01      | 0.82             | 7.091e-01         | 1.925             |              |                   |                  |
| ≥ 0.00997                 | 46              | 43            | 93.48         | 1.917     | 1.222         | 3.005         | 4.595e-03      | 0.67             | 2.683e-01         | 9.774e-01         |              |                   |                  |
| <b>Profile Likelihood</b> |                 |               |               |           |               |               |                |                  |                   |                   |              |                   |                  |
| < 0.0092                  | 74              | 64            | 86.49         | ----      | ----          | ----          | ----           | 1.25             | 9.500e-01         | 2.012             | 4.35e-04     | 3.07e-04          | 8.11e-05         |
| ≥ 0.0092                  | 61              | 58            | 95.08         | 1.942     | 1.346         | 2.800         | 3.822e-04      | 0.71             | 4.791e-01         | 8.624e-01         |              |                   |                  |
| <b>Quantitative*</b>      | 135             | 122           | 90.37         | 0.9999    | 0.9866        | 1.013         | 9.852e-01      |                  |                   |                   | 9.851e-01    | 9.852e-01         |                  |

\*Units of pg / mL were used in **Quantitative model only**.

**Cohort: Derivation**  
**Outcome: Progression Free Survival by FVC ( Lung Transplant counts as event )**  
**Predictor: VCAM1 ( ng / mL )**

|                           | Patients<br>(N) | Events<br>(n) | Events<br>(%) | HR        | HR<br>95% LCL | HR<br>95% UCL | Wald<br>pvalue | Median<br>(yrs.) | Median<br>95% LCL | Median<br>95% UCL | LR<br>pvalue | Logrank<br>pvalue | DevLIN<br>pvalue |
|---------------------------|-----------------|---------------|---------------|-----------|---------------|---------------|----------------|------------------|-------------------|-------------------|--------------|-------------------|------------------|
| <b>Quintiles</b>          |                 |               |               |           |               |               |                |                  |                   |                   |              |                   |                  |
| < 335                     | 26              | 23            | 88.46         | ----      | ----          | ----          | ----           | 1.11             | 6.324e-01         | 2.357             | 1.57e-02     | 2.36e-02          | 3.93e-02         |
| [ 335,402)                | 27              | 22            | 81.48         | 5.636e-01 | 3.101e-01     | 1.024         | 6.002e-02      | 2.03             | 9.062e-01         | 4.044             |              |                   |                  |
| [ 402,457)                | 29              | 27            | 93.10         | 1.366     | 7.793e-01     | 2.394         | 2.762e-01      | 0.71             | 4.983e-01         | 1.112             |              |                   |                  |
| [ 457,572)                | 28              | 26            | 92.86         | 1.285     | 7.299e-01     | 2.263         | 3.848e-01      | 0.57             | 3.587e-01         | 1.714             |              |                   |                  |
| ≥ 572                     | 25              | 24            | 96.00         | 1.196     | 6.735e-01     | 2.123         | 5.415e-01      | 0.94             | 5.284e-01         | 1.947             |              |                   |                  |
| <b>Quartiles</b>          |                 |               |               |           |               |               |                |                  |                   |                   |              |                   |                  |
| < 359                     | 34              | 28            | 82.35         | ----      | ----          | ----          | ----           | 1.14             | 6.324e-01         | 2.357             | 3.29e-02     | 2.71e-02          | 8.97e-02         |
| [ 359,419)                | 32              | 29            | 90.62         | 1.021     | 6.066e-01     | 1.719         | 9.368e-01      | 1.05             | 8.598e-01         | 2.275             |              |                   |                  |
| [ 419,518)                | 37              | 35            | 94.59         | 1.922     | 1.156         | 3.196         | 1.172e-02      | 0.58             | 4.081e-01         | 9.008e-01         |              |                   |                  |
| ≥ 518                     | 32              | 30            | 93.75         | 1.478     | 8.787e-01     | 2.486         | 1.409e-01      | 0.84             | 3.313e-01         | 1.717             |              |                   |                  |
| <b>Tertiles</b>           |                 |               |               |           |               |               |                |                  |                   |                   |              |                   |                  |
| < 378                     | 46              | 38            | 82.61         | ----      | ----          | ----          | ----           | 1.14             | 7.940e-01         | 2.078             | 1.63e-01     | 1.74e-01          | 3.74e-01         |
| [ 378,480)                | 45              | 43            | 95.56         | 1.461     | 9.420e-01     | 2.264         | 9.043e-02      | 0.72             | 4.983e-01         | 1.273             |              |                   |                  |
| ≥ 480                     | 44              | 41            | 93.18         | 1.424     | 9.128e-01     | 2.221         | 1.193e-01      | 0.84             | 5.284e-01         | 1.361             |              |                   |                  |
| <b>Profile Likelihood</b> |                 |               |               |           |               |               |                |                  |                   |                   |              |                   |                  |
| < 390.5                   | 51              | 43            | 84.31         | ----      | ----          | ----          | ----           | 1.33             | 9.199e-01         | 2.275             | 3.30e-03     | 3.76e-03          | 1.02e-02         |
| ≥ 390.5                   | 84              | 79            | 94.05         | 1.754     | 1.195         | 2.575         | 4.109e-03      | 0.75             | 5.749e-01         | 9.500e-01         |              |                   |                  |
| <b>Quantitative</b>       |                 |               |               |           |               |               |                |                  |                   |                   |              |                   |                  |
|                           | 135             | 122           | 90.37         | 1.001     | 9.998e-01     | 1.002         | 1.180e-01      |                  |                   |                   | 1.337e-01    | 1.176e-01         |                  |

**Cohort: Derivation**  
**Outcome: Progression Free Survival by FVC ( Lung Transplant counts as event )**  
**Predictor: S100A12 ( ng / mL )**

|                           | Patients<br>(N) | Events<br>(n) | Events<br>(%) | HR    | HR<br>95% LCL | HR<br>95% UCL | Wald<br>pvalue | Median<br>(yrs.) | Median<br>95% LCL | Median<br>95% UCL | LR<br>pvalue | Logrank<br>pvalue | DevLIN<br>pvalue |
|---------------------------|-----------------|---------------|---------------|-------|---------------|---------------|----------------|------------------|-------------------|-------------------|--------------|-------------------|------------------|
| <b>Quintiles</b>          |                 |               |               |       |               |               |                |                  |                   |                   |              |                   |                  |
| < 15                      | 26              | 22            | 84.62         | ----  | ----          | ----          | ----           | 1.83             | 8.624e-01         | 2.970             | 3.76e-03     | 1.90e-03          | 5.03e-03         |
| [ 15,21.6)                | 29              | 24            | 82.76         | 1.790 | 9.910e-01     | 3.234         | 5.362e-02      | 0.86             | 6.708e-01         | 1.402             |              |                   |                  |
| [ 21.6,29)                | 26              | 24            | 92.31         | 1.246 | 6.974e-01     | 2.226         | 4.577e-01      | 1.13             | 7.502e-01         | 2.431             |              |                   |                  |
| [ 29,51)                  | 26              | 26            | 100.00        | 3.056 | 1.700         | 5.493         | 1.883e-04      | 0.57             | 3.258e-01         | 9.199e-01         |              |                   |                  |
| ≥ 51                      | 28              | 26            | 92.86         | 1.707 | 9.657e-01     | 3.019         | 6.576e-02      | 0.53             | 3.258e-01         | 2.127             |              |                   |                  |
| <b>Quartiles</b>          |                 |               |               |       |               |               |                |                  |                   |                   |              |                   |                  |
| < 17.8                    | 34              | 30            | 88.24         | ----  | ----          | ----          | ----           | 1.23             | 8.598e-01         | 2.111             | 1.66e-01     | 1.65e-01          | 2.21e-01         |
| [ 17.8,25)                | 34              | 27            | 79.41         | 1.115 | 6.608e-01     | 1.882         | 6.832e-01      | 1.05             | 7.010e-01         | 2.034             |              |                   |                  |
| [ 25,45.2)                | 34              | 34            | 100.00        | 1.606 | 9.810e-01     | 2.630         | 5.960e-02      | 0.74             | 4.983e-01         | 1.144             |              |                   |                  |
| ≥ 45.2                    | 33              | 31            | 93.94         | 1.535 | 9.278e-01     | 2.540         | 9.529e-02      | 0.74             | 3.258e-01         | 1.572             |              |                   |                  |
| <b>Tertiles</b>           |                 |               |               |       |               |               |                |                  |                   |                   |              |                   |                  |
| < 19                      | 39              | 34            | 87.18         | ----  | ----          | ----          | ----           | 1.11             | 8.350e-01         | 2.111             | 6.91e-02     | 5.99e-02          | 6.26e-02         |
| [ 19,37)                  | 51              | 45            | 88.24         | 1.126 | 7.201e-01     | 1.759         | 6.039e-01      | 1.05             | 7.091e-01         | 1.925             |              |                   |                  |
| ≥ 37                      | 45              | 43            | 95.56         | 1.659 | 1.056         | 2.606         | 2.820e-02      | 0.74             | 3.285e-01         | 9.391e-01         |              |                   |                  |
| <b>Profile Likelihood</b> |                 |               |               |       |               |               |                |                  |                   |                   |              |                   |                  |
| < 26.5                    | 75              | 64            | 85.33         | ----  | ----          | ----          | ----           | 1.14             | 8.624e-01         | 1.947             | 2.91e-03     | 2.37e-03          | 2.25e-03         |
| ≥ 26.5                    | 60              | 58            | 96.67         | 1.731 | 1.211         | 2.475         | 2.631e-03      | 0.63             | 3.532e-01         | 9.199e-01         |              |                   |                  |
| <b>Quantitative</b>       | 135             | 122           | 90.37         | 1.002 | 9.981e-01     | 1.005         | 3.563e-01      |                  |                   |                   | 3.798e-01    | 3.553e-01         |                  |



**Cohort: Derivation**

**Outcome: Progression Free Survival by DLCO ( Lung Transplant counts as event )**

**Predictor: Age (years)**

|                           | Patients<br>(N) | Events<br>(n) | Events<br>(%) | HR        | HR<br>95% LCL | HR<br>95% UCL | Wald<br>pvalue | Median<br>(yrs.) | Median<br>95% LCL | Median<br>95% UCL | LR<br>pvalue | Logrank<br>pvalue | DevLIN<br>pvalue |
|---------------------------|-----------------|---------------|---------------|-----------|---------------|---------------|----------------|------------------|-------------------|-------------------|--------------|-------------------|------------------|
| <b>Quintiles</b>          |                 |               |               |           |               |               |                |                  |                   |                   |              |                   |                  |
| < 59.5                    | 26              | 23            | 88.46         | ----      | ----          | ----          | ----           | 0.56             | 4.025e-01         | 1.673             | 6.92e-01     | 6.65e-01          | 2.77e-01         |
| [ 59.5,66.1)              | 28              | 24            | 85.71         | 1.296     | 7.275e-01     | 2.309         | 3.787e-01      | 0.41             | 3.532e-01         | 1.744             |              |                   |                  |
| [ 66.1,69.7)              | 27              | 24            | 88.89         | 8.574e-01 | 4.799e-01     | 1.532         | 6.034e-01      | 0.98             | 7.775e-01         | 2.064             |              |                   |                  |
| [ 69.7,73.9)              | 26              | 25            | 96.15         | 9.604e-01 | 5.423e-01     | 1.701         | 8.899e-01      | 0.91             | 8.049e-01         | 2.070             |              |                   |                  |
| ≥ 73.9                    | 28              | 26            | 92.86         | 9.207e-01 | 5.234e-01     | 1.619         | 7.742e-01      | 1.12             | 5.941e-01         | 2.111             |              |                   |                  |
| <b>Quartiles</b>          |                 |               |               |           |               |               |                |                  |                   |                   |              |                   |                  |
| < 61.2                    | 33              | 28            | 84.85         | ----      | ----          | ----          | ----           | 0.62             | 4.408e-01         | 1.673             | 3.34e-01     | 3.39e-01          | 1.21e-01         |
| [ 61.2,68.5)              | 34              | 31            | 91.18         | 1.171     | 6.996e-01     | 1.960         | 5.482e-01      | 0.75             | 3.751e-01         | 1.035             |              |                   |                  |
| [ 68.5,73.3)              | 35              | 32            | 91.43         | 7.404e-01 | 4.434e-01     | 1.236         | 2.506e-01      | 1.40             | 8.433e-01         | 2.070             |              |                   |                  |
| ≥ 73.3                    | 33              | 31            | 93.94         | 9.603e-01 | 5.744e-01     | 1.606         | 8.773e-01      | 0.86             | 6.407e-01         | 1.396             |              |                   |                  |
| <b>Tertiles</b>           |                 |               |               |           |               |               |                |                  |                   |                   |              |                   |                  |
| < 64.7                    | 45              | 39            | 86.67         | ----      | ----          | ----          | ----           | 0.62             | 4.353e-01         | 1.333             | 6.54e-01     | 6.55e-01          | 6.58e-02         |
| [ 64.7,71.3)              | 45              | 40            | 88.89         | 8.175e-01 | 5.237e-01     | 1.276         | 3.751e-01      | 0.98             | 7.173e-01         | 2.034             |              |                   |                  |
| ≥ 71.3                    | 45              | 43            | 95.56         | 9.440e-01 | 6.107e-01     | 1.459         | 7.954e-01      | 0.84             | 6.708e-01         | 1.396             |              |                   |                  |
| <b>Profile Likelihood</b> |                 |               |               |           |               |               |                |                  |                   |                   |              |                   |                  |
| <67.1                     | 59              | 52            | 88.14         | ----      | ----          | ----          | ----           | 0.47             | 3.751e-01         | 8.598e-01         | 7.93e-02     | 7.48e-02          | 1.81e-01         |
| ≥67.1                     | 76              | 70            | 92.11         | 7.213e-01 | 5.024e-01     | 1.035         | 7.648e-02      | 0.98             | 8.624e-01         | 1.446             |              |                   |                  |
| <b>Quantitative</b>       |                 |               |               |           |               |               |                |                  |                   |                   |              |                   |                  |
|                           | 135             | 122           | 90.37         | 9.848e-01 | 9.610e-01     | 1.009         | 2.171e-01      |                  |                   |                   | 2.190e-01    | 2.168e-01         |                  |
| <b>Predictor: Gender</b>  |                 |               |               |           |               |               |                |                  |                   |                   |              |                   |                  |
| Female                    | 36              | 32            | 88.89         | ----      | ----          | ----          | ----           | 1.12             | 0.843             | 1.82              |              |                   |                  |
| Male                      | 99              | 90            | 90.91         | 1.20      | 0.798         | 1.794         | 3.85E-01       | 0.81             | 0.594             | 0.98              | 3.79E-01     | 3.85E-01          |                  |

**Cohort: Derivation**  
**Outcome: Progression Free Survival by DLCO ( Lung Transplant counts as event )**  
**Predictor: Baseline (4-month) FVC % Predicted**

|                           | Patients<br>(N) | Events<br>(n) | Events<br>(%) | HR        | HR<br>95% LCL | HR<br>95% UCL | Wald<br>pvalue | Median<br>(yrs.) | Median<br>95% LCL | Median<br>95% UCL | LR<br>pvalue | Logrank<br>pvalue | DevLIN<br>pvalue |
|---------------------------|-----------------|---------------|---------------|-----------|---------------|---------------|----------------|------------------|-------------------|-------------------|--------------|-------------------|------------------|
| <b>Quintiles</b>          |                 |               |               |           |               |               |                |                  |                   |                   |              |                   |                  |
| < 43.3                    | 24              | 23            | 95.83         | ----      | ----          | ----          | ----           | 0.40             | 1.533e-01         | 8.598e-01         | 8.54e-05     | 1.76e-04          | 1.53e-01         |
| [ 43.3,56.6)              | 24              | 23            | 95.83         | 8.687e-01 | 4.849e-01     | 1.556         | 6.362e-01      | 0.59             | 4.791e-01         | 9.008e-01         |              |                   |                  |
| [ 56.6,66)                | 23              | 20            | 86.96         | 6.316e-01 | 3.463e-01     | 1.152         | 1.340e-01      | 0.84             | 7.091e-01         | 1.582             |              |                   |                  |
| [ 66,77)                  | 22              | 21            | 95.45         | 6.643e-01 | 3.662e-01     | 1.205         | 1.781e-01      | 1.26             | 5.749e-01         | 1.744             |              |                   |                  |
| ≥ 77                      | 25              | 19            | 76.00         | 2.448e-01 | 1.269e-01     | 4.723e-01     | 2.690e-05      | 2.06             | 1.112             |                   |              |                   |                  |
| <b>Quartiles</b>          |                 |               |               |           |               |               |                |                  |                   |                   |              |                   |                  |
| < 47.8                    | 30              | 29            | 96.67         | ----      | ----          | ----          | ----           | 0.38             | 2.300e-01         | 8.378e-01         | 1.02e-04     | 1.50e-04          | 2.71e-01         |
| [ 47.8,61.1)              | 30              | 27            | 90.00         | 7.290e-01 | 4.297e-01     | 1.237         | 2.411e-01      | 0.70             | 4.873e-01         | 1.035             |              |                   |                  |
| [ 61.1,74)                | 28              | 26            | 92.86         | 6.687e-01 | 3.928e-01     | 1.138         | 1.381e-01      | 0.98             | 7.091e-01         | 1.402             |              |                   |                  |
| ≥ 74                      | 30              | 24            | 80.00         | 2.862e-01 | 1.606e-01     | 5.100e-01     | 2.202e-05      | 1.67             | 1.112             | 4.044             |              |                   |                  |
| <b>Tertiles</b>           |                 |               |               |           |               |               |                |                  |                   |                   |              |                   |                  |
| < 52.8                    | 40              | 39            | 97.50         | ----      | ----          | ----          | ----           | 0.50             | 2.930e-01         | 8.378e-01         | 2.54e-05     | 1.51e-05          | 1.39e-01         |
| [ 52.8,69.9)              | 40              | 35            | 87.50         | 5.914e-01 | 3.736e-01     | 9.361e-01     | 2.498e-02      | 0.86             | 6.626e-01         | 1.342             |              |                   |                  |
| ≥ 69.9                    | 38              | 32            | 84.21         | 3.139e-01 | 1.904e-01     | 5.177e-01     | 5.622e-06      | 1.47             | 1.112             | 2.645             |              |                   |                  |
| <b>Profile Likelihood</b> |                 |               |               |           |               |               |                |                  |                   |                   |              |                   |                  |
| < 76.9                    | 93              | 87            | 93.55         | ----      | ----          | ----          | ----           | 0.72             | 5.830e-01         | 9.008e-01         | 5.11e-06     | 1.98e-05          | 2.14e-02         |
| ≥ 76.9                    | 25              | 19            | 76.00         | 3.169e-01 | 1.825e-01     | 5.504e-01     | 4.500e-05      | 2.06             | 1.112             |                   |              |                   |                  |
| <b>Quantitative</b>       | 118             | 106           | 89.83         | 9.788e-01 | 9.687e-01     | 9.889e-01     | 4.750e-05      |                  |                   |                   | 3.332e-05    | 4.530e-05         |                  |

**Cohort: Derivation**  
**Outcome: Progression Free Survival by DLCO ( Lung Transplant counts as event )**  
**Predictor: Baseline (4-month) DLco % Predicted**

|                           | Patients<br>(N) | Events<br>(n) | Events<br>(%) | HR        | HR<br>95% LCL | HR<br>95% UCL | Wald<br>pvalue | Median<br>(yrs.) | Median<br>95% LCL | Median<br>95% UCL | LR<br>pvalue | Logrank<br>pvalue | DevLIN<br>pvalue |
|---------------------------|-----------------|---------------|---------------|-----------|---------------|---------------|----------------|------------------|-------------------|-------------------|--------------|-------------------|------------------|
| <b>Quintiles</b>          |                 |               |               |           |               |               |                |                  |                   |                   |              |                   |                  |
| < 28.9                    | 21              | 21            | 100.00        | ----      | ----          | ----          | ----           | 0.44             | 9.035e-02         | 1.123             | 3.53e-04     | 1.46e-04          | 4.86e-01         |
| [ 28.9,39)                | 22              | 20            | 90.91         | 6.813e-01 | 3.671e-01     | 1.265         | 2.240e-01      | 0.82             | 2.930e-01         | 1.402             |              |                   |                  |
| [ 39,49.4)                | 21              | 18            | 85.71         | 4.564e-01 | 2.413e-01     | 8.630e-01     | 1.581e-02      | 0.86             | 5.941e-01         | 2.034             |              |                   |                  |
| [ 49.4,60)                | 20              | 18            | 90.00         | 3.505e-01 | 1.835e-01     | 6.696e-01     | 1.500e-03      | 1.25             | 8.049e-01         | 2.850             |              |                   |                  |
| ≥ 60                      | 22              | 17            | 77.27         | 2.370e-01 | 1.191e-01     | 4.718e-01     | 4.149e-05      | 1.74             | 1.035             | 2.850             |              |                   |                  |
| <b>Quartiles</b>          |                 |               |               |           |               |               |                |                  |                   |                   |              |                   |                  |
| < 31.6                    | 26              | 26            | 100.00        | ----      | ----          | ----          | ----           | 0.80             | 2.300e-01         | 1.265             | 1.82e-04     | 1.04e-04          | 3.85e-01         |
| [ 31.6,43.8)              | 27              | 24            | 88.89         | 9.882e-01 | 5.654e-01     | 1.727         | 9.669e-01      | 0.56             | 3.313e-01         | 9.774e-01         |              |                   |                  |
| [ 43.8,57)                | 25              | 22            | 88.00         | 4.332e-01 | 2.434e-01     | 7.712e-01     | 4.472e-03      | 1.34             | 8.624e-01         | 2.519             |              |                   |                  |
| ≥ 57                      | 28              | 22            | 78.57         | 3.412e-01 | 1.879e-01     | 6.198e-01     | 4.143e-04      | 1.47             | 1.035             | 2.645             |              |                   |                  |
| <b>Tertiles</b>           |                 |               |               |           |               |               |                |                  |                   |                   |              |                   |                  |
| < 36.6                    | 35              | 34            | 97.14         | ----      | ----          | ----          | ----           | 0.44             | 2.546e-01         | 9.062e-01         | 4.13e-04     | 1.71e-04          | 8.20e-01         |
| [ 36.6,53.4)              | 37              | 32            | 86.49         | 5.112e-01 | 3.144e-01     | 8.312e-01     | 6.825e-03      | 0.98             | 7.091e-01         | 1.673             |              |                   |                  |
| ≥ 53.4                    | 34              | 28            | 82.35         | 3.527e-01 | 2.092e-01     | 5.946e-01     | 9.228e-05      | 1.33             | 8.433e-01         | 2.645             |              |                   |                  |
| <b>Profile Likelihood</b> |                 |               |               |           |               |               |                |                  |                   |                   |              |                   |                  |
| <41.0                     | 51              | 49            | 96.08         | ----      | ----          | ----          | ----           | 0.59             | 4.025e-01         | 9.008e-01         | 1.20e-06     | 4.01e-07          | 1.41e-02         |
| ≥41.0                     | 55              | 45            | 81.82         | 3.429e-01 | 2.229e-01     | 5.276e-01     | 1.119e-06      | 1.47             | 1.112             | 2.242             |              |                   |                  |
| <b>Quantitative</b>       | 106             | 94            | 88.68         | 9.728e-01 | 9.603e-01     | 9.855e-01     | 2.927e-05      |                  |                   |                   | 2.582e-05    | 2.446e-05         |                  |

**Cohort: Derivation**  
**Outcome: Progression Free Survival by DLCO ( Lung Transplant counts as event )**  
**Predictor: Baseline (4-month) CPI**

|                           | Patients<br>(N) | Events<br>(n) | Events<br>(%) | HR    | HR<br>95% LCL | HR<br>95% UCL | Wald<br>pvalue | Median<br>(yrs.) | Median<br>95% LCL | Median<br>95% UCL | LR<br>pvalue | Logrank<br>pvalue | DevLIN<br>pvalue |
|---------------------------|-----------------|---------------|---------------|-------|---------------|---------------|----------------|------------------|-------------------|-------------------|--------------|-------------------|------------------|
| <b>Quintiles</b>          |                 |               |               |       |               |               |                |                  |                   |                   |              |                   |                  |
| < 43                      | 22              | 16            | 72.73         | ----  | ----          | ----          | ----           | 1.74             | 1.112             |                   | 3.96e-05     | 1.78e-05          | 3.03e-01         |
| [ 43,50.8)                | 20              | 18            | 90.00         | 1.373 | 6.907e-01     | 2.730         | 3.657e-01      | 1.14             | 8.624e-01         | 3.261             |              |                   |                  |
| [ 50.8,58.7)              | 21              | 19            | 90.48         | 2.294 | 1.144         | 4.603         | 1.941e-02      | 0.99             | 6.186e-01         | 1.673             |              |                   |                  |
| [ 58.7,64.5)              | 22              | 20            | 90.91         | 3.861 | 1.928         | 7.730         | 1.369e-04      | 0.59             | 4.081e-01         | 9.500e-01         |              |                   |                  |
| ≥ 64.5                    | 21              | 21            | 100.00        | 4.101 | 2.073         | 8.111         | 5.006e-05      | 0.40             | 8.761e-02         | 1.123             |              |                   |                  |
| <b>Quartiles</b>          |                 |               |               |       |               |               |                |                  |                   |                   |              |                   |                  |
| < 44.4                    | 25              | 19            | 76.00         | ----  | ----          | ----          | ----           | 1.74             | 1.112             |                   | 1.97e-05     | 3.42e-06          | 2.85e-01         |
| [ 44.4,56)                | 27              | 24            | 88.89         | 1.422 | 7.700e-01     | 2.626         | 2.606e-01      | 1.23             | 8.433e-01         | 2.519             |              |                   |                  |
| [ 56,62.7)                | 27              | 24            | 88.89         | 2.378 | 1.267         | 4.461         | 6.977e-03      | 0.86             | 6.407e-01         | 1.446             |              |                   |                  |
| ≥ 62.7                    | 27              | 27            | 100.00        | 4.299 | 2.323         | 7.958         | 3.440e-06      | 0.33             | 1.477e-01         | 8.378e-01         |              |                   |                  |
| <b>Tertiles</b>           |                 |               |               |       |               |               |                |                  |                   |                   |              |                   |                  |
| < 47.7                    | 34              | 27            | 79.41         | ----  | ----          | ----          | ----           | 1.47             | 1.087             | 2.645             | 5.81e-06     | 1.02e-06          | 1.58e-01         |
| [ 47.7,59.8)              | 37              | 32            | 86.49         | 1.642 | 9.632e-01     | 2.800         | 6.841e-02      | 0.99             | 7.173e-01         | 1.703             |              |                   |                  |
| ≥ 59.8                    | 35              | 35            | 100.00        | 3.790 | 2.211         | 6.496         | 1.262e-06      | 0.44             | 2.546e-01         | 8.378e-01         |              |                   |                  |
| <b>Profile Likelihood</b> |                 |               |               |       |               |               |                |                  |                   |                   |              |                   |                  |
| <56.2                     | 55              | 45            | 81.82         | ----  | ----          | ----          | ----           | 1.45             | 1.112             | 2.242             | 1.11e-06     | 3.63e-07          | 3.71e-02         |
| ≥56.2                     | 51              | 49            | 96.08         | 2.924 | 1.902         | 4.497         | 1.023e-06      | 0.59             | 4.025e-01         | 8.624e-01         |              |                   |                  |
| <b>Quantitative</b>       | 106             | 94            | 88.68         | 1.040 | 1.023         | 1.058         | 6.016e-06      |                  |                   |                   | 5.327e-06    | 5.830e-06         |                  |

**Cohort: Derivation**  
**Outcome: Progression Free Survival by DLCO ( Lung Transplant counts as event )**  
**Predictor: Baseline (3-month) FVC % Predicted**

|                           | Patients<br>(N) | Events<br>(n) | Events<br>(%) | HR        | HR<br>95% LCL | HR<br>95% UCL | Wald<br>pvalue | Median<br>(yrs.) | Median<br>95% LCL | Median<br>95% UCL | LR<br>pvalue | Logrank<br>pvalue | DevLIN<br>pvalue |
|---------------------------|-----------------|---------------|---------------|-----------|---------------|---------------|----------------|------------------|-------------------|-------------------|--------------|-------------------|------------------|
| <b>Quintiles</b>          |                 |               |               |           |               |               |                |                  |                   |                   |              |                   |                  |
| < 43.1                    | 22              | 21            | 95.45         | ----      | ----          | ----          | ----           | 0.28             | 1.477e-01         | 1.703             | 1.05e-04     | 1.75e-04          | 2.33e-01         |
| [ 43.1,56.5)              | 21              | 20            | 95.24         | 1.046     | 5.589e-01     | 1.957         | 8.888e-01      | 0.56             | 3.587e-01         | 9.008e-01         |              |                   |                  |
| [ 56.5,65.7)              | 22              | 19            | 86.36         | 6.227e-01 | 3.340e-01     | 1.161         | 1.360e-01      | 0.86             | 6.626e-01         | 2.242             |              |                   |                  |
| [ 65.7,76.7)              | 19              | 18            | 94.74         | 6.697e-01 | 3.553e-01     | 1.262         | 2.152e-01      | 1.26             | 5.749e-01         | 1.821             |              |                   |                  |
| ≥ 76.7                    | 22              | 16            | 72.73         | 2.462e-01 | 1.230e-01     | 4.925e-01     | 7.452e-05      | 2.06             | 1.144             |                   |              |                   |                  |
| <b>Quartiles</b>          |                 |               |               |           |               |               |                |                  |                   |                   |              |                   |                  |
| < 47.8                    | 27              | 26            | 96.30         | ----      | ----          | ----          | ----           | 0.33             | 1.697e-01         | 7.775e-01         | 7.94e-05     | 1.17e-04          | 2.96e-01         |
| [ 47.8,60.5)              | 27              | 24            | 88.89         | 7.048e-01 | 4.024e-01     | 1.234         | 2.211e-01      | 0.70             | 4.791e-01         | 1.035             |              |                   |                  |
| [ 60.5,73.4)              | 27              | 25            | 92.59         | 6.264e-01 | 3.606e-01     | 1.088         | 9.679e-02      | 0.91             | 6.626e-01         | 1.402             |              |                   |                  |
| ≥ 73.4                    | 25              | 19            | 76.00         | 2.511e-01 | 1.337e-01     | 4.716e-01     | 1.735e-05      | 1.95             | 1.144             |                   |              |                   |                  |
| <b>Tertiles</b>           |                 |               |               |           |               |               |                |                  |                   |                   |              |                   |                  |
| < 52.4                    | 36              | 35            | 97.22         | ----      | ----          | ----          | ----           | 0.40             | 2.300e-01         | 7.775e-01         | 4.02e-05     | 2.54e-05          | 2.92e-01         |
| [ 52.4,69.6)              | 36              | 31            | 86.11         | 5.970e-01 | 3.670e-01     | 9.712e-01     | 3.773e-02      | 0.84             | 6.407e-01         | 1.235             |              |                   |                  |
| ≥ 69.6                    | 34              | 28            | 82.35         | 3.024e-01 | 1.781e-01     | 5.134e-01     | 9.482e-06      | 1.46             | 1.246             | 2.645             |              |                   |                  |
| <b>Profile Likelihood</b> |                 |               |               |           |               |               |                |                  |                   |                   |              |                   |                  |
| < 76.3                    | 83              | 77            | 92.77         | ----      | ----          | ----          | ----           | 0.67             | 4.873e-01         | 9.008e-01         | 1.02e-05     | 3.36e-05          | 4.70e-02         |
| ≥ 76.3                    | 23              | 17            | 73.91         | 3.147e-01 | 1.777e-01     | 5.573e-01     | 7.353e-05      | 2.06             | 1.144             |                   |              |                   |                  |
| <b>Quantitative</b>       |                 |               |               |           |               |               |                |                  |                   |                   |              |                   |                  |
|                           | 106             | 94            | 88.68         | 9.774e-01 | 9.669e-01     | 9.880e-01     | 3.163e-05      |                  |                   |                   | 2.211e-05    | 3.013e-05         |                  |

Cohort: **Derivation**

Outcome: **Progression Free Survival by DLCO ( Lung Transplant counts as event )**

Predictor: **Baseline (3-month) DLco % Predicted**

|                           | Patients<br>(N) | Events<br>(n) | Events<br>(%) | HR        | HR<br>95% LCL | HR<br>95% UCL | Wald<br>pvalue | Median<br>(yrs.) | Median<br>95% LCL | Median<br>95% UCL | LR<br>pvalue | Logrank<br>pvalue | DevLIN<br>pvalue |
|---------------------------|-----------------|---------------|---------------|-----------|---------------|---------------|----------------|------------------|-------------------|-------------------|--------------|-------------------|------------------|
| <b>Quintiles</b>          |                 |               |               |           |               |               |                |                  |                   |                   |              |                   |                  |
| < 28.6                    | 18              | 18            | 100.00        | ----      | ----          | ----          | ----           | 0.33             | 8.761e-02         | 1.265             | 8.30e-04     | 4.57e-04          | 6.40e-01         |
| [ 28.6,38)                | 18              | 16            | 88.89         | 7.422e-01 | 3.746e-01     | 1.471         | 3.928e-01      | 0.40             | 1.834e-01         | 1.582             |              |                   |                  |
| [ 38,49.9)                | 20              | 17            | 85.00         | 4.481e-01 | 2.296e-01     | 8.744e-01     | 1.859e-02      | 0.86             | 6.708e-01         | 1.821             |              |                   |                  |
| [ 49.9,61)                | 18              | 17            | 94.44         | 4.362e-01 | 2.234e-01     | 8.518e-01     | 1.511e-02      | 1.14             | 7.173e-01         | 2.519             |              |                   |                  |
| ≥ 61                      | 20              | 15            | 75.00         | 2.285e-01 | 1.096e-01     | 4.765e-01     | 8.249e-05      | 2.06             | 8.433e-01         |                   |              |                   |                  |
| <b>Quartiles</b>          |                 |               |               |           |               |               |                |                  |                   |                   |              |                   |                  |
| < 31.4                    | 23              | 23            | 100.00        | ----      | ----          | ----          | ----           | 0.58             | 1.697e-01         | 1.265             | 4.54e-04     | 4.27e-04          | 5.96e-01         |
| [ 31.4,41.3)              | 24              | 21            | 87.50         | 9.550e-01 | 5.262e-01     | 1.733         | 8.796e-01      | 0.56             | 2.930e-01         | 9.774e-01         |              |                   |                  |
| [ 41.3,57.2)              | 23              | 21            | 91.30         | 5.404e-01 | 2.984e-01     | 9.784e-01     | 4.215e-02      | 1.23             | 7.173e-01         | 1.947             |              |                   |                  |
| ≥ 57.2                    | 24              | 18            | 75.00         | 3.024e-01 | 1.579e-01     | 5.793e-01     | 3.110e-04      | 2.06             | 1.035             |                   |              |                   |                  |
| <b>Tertiles</b>           |                 |               |               |           |               |               |                |                  |                   |                   |              |                   |                  |
| < 34.5                    | 31              | 30            | 96.77         | ----      | ----          | ----          | ----           | 0.41             | 2.300e-01         | 9.500e-01         | 8.36e-04     | 5.54e-04          | 9.98e-01         |
| [ 34.5,54.3)              | 32              | 28            | 87.50         | 6.023e-01 | 3.592e-01     | 1.010         | 5.455e-02      | 0.98             | 6.407e-01         | 1.582             |              |                   |                  |
| ≥ 54.3                    | 31              | 25            | 80.65         | 3.477e-01 | 2.000e-01     | 6.046e-01     | 1.822e-04      | 1.47             | 8.049e-01         | 2.645             |              |                   |                  |
| <b>Profile Likelihood</b> |                 |               |               |           |               |               |                |                  |                   |                   |              |                   |                  |
| <41.0                     | 46              | 44            | 95.65         | ----      | ----          | ----          | ----           | 0.56             | 2.930e-01         | 9.008e-01         | 6.01e-06     | 2.36e-06          | 3.66e-02         |
| ≥41.0                     | 48              | 39            | 81.25         | 3.498e-01 | 2.222e-01     | 5.507e-01     | 5.717e-06      | 1.34             | 1.035             | 2.070             |              |                   |                  |
| <b>Quantitative</b>       | 94              | 83            | 88.30         | 9.731e-01 | 9.602e-01     | 9.861e-01     | 5.720e-05      |                  |                   |                   | 5.179e-05    | 4.502e-05         |                  |

**Cohort: Derivation**  
**Outcome: Progression Free Survival by DLCO ( Lung Transplant counts as event )**  
**Predictor: Baseline (3-month) CPI**

|                           | Patients<br>(N) | Events<br>(n) | Events<br>(%) | HR    | HR<br>95% LCL | HR<br>95% UCL | Wald<br>pvalue | Median<br>(yrs.) | Median<br>95% LCL | Median<br>95% UCL | LR<br>pvalue | Logrank<br>pvalue | DevLIN<br>pvalue |
|---------------------------|-----------------|---------------|---------------|-------|---------------|---------------|----------------|------------------|-------------------|-------------------|--------------|-------------------|------------------|
| <b>Quintiles</b>          |                 |               |               |       |               |               |                |                  |                   |                   |              |                   |                  |
| < 42.8                    | 19              | 13            | 68.42         | ----  | ----          | ----          | ----           | 2.06             | 1.333             |                   | 1.49e-04     | 1.05e-04          | 5.12e-01         |
| [ 42.8,51.5)              | 18              | 17            | 94.44         | 1.751 | 8.328e-01     | 3.681         | 1.395e-01      | 1.12             | 8.433e-01         | 2.645             |              |                   |                  |
| [ 51.5,59)                | 19              | 16            | 84.21         | 2.543 | 1.175         | 5.505         | 1.783e-02      | 0.98             | 6.186e-01         | 1.446             |              |                   |                  |
| [ 59,65.1)                | 19              | 18            | 94.74         | 4.360 | 2.046         | 9.290         | 1.359e-04      | 0.47             | 2.930e-01         | 9.500e-01         |              |                   |                  |
| ≥ 65.1                    | 19              | 19            | 100.00        | 4.257 | 2.026         | 8.945         | 1.312e-04      | 0.33             | 8.761e-02         | 1.265             |              |                   |                  |
| <b>Quartiles</b>          |                 |               |               |       |               |               |                |                  |                   |                   |              |                   |                  |
| < 44.3                    | 23              | 17            | 73.91         | ----  | ----          | ----          | ----           | 1.74             | 1.035             |                   | 3.84e-05     | 1.46e-05          | 2.87e-01         |
| [ 44.3,56.1)              | 24              | 21            | 87.50         | 1.557 | 8.098e-01     | 2.992         | 1.844e-01      | 1.23             | 8.433e-01         | 2.242             |              |                   |                  |
| [ 56.1,62.8)              | 24              | 22            | 91.67         | 3.044 | 1.560         | 5.940         | 1.097e-03      | 0.67             | 5.010e-01         | 9.856e-01         |              |                   |                  |
| ≥ 62.8                    | 23              | 23            | 100.00        | 4.248 | 2.206         | 8.182         | 1.523e-05      | 0.23             | 9.035e-02         | 9.062e-01         |              |                   |                  |
| <b>Tertiles</b>           |                 |               |               |       |               |               |                |                  |                   |                   |              |                   |                  |
| < 47.6                    | 31              | 24            | 77.42         | ----  | ----          | ----          | ----           | 1.74             | 1.035             | 2.645             | 1.47e-05     | 3.87e-06          | 2.22e-01         |
| [ 47.6,59.9)              | 32              | 28            | 87.50         | 1.833 | 1.042         | 3.222         | 3.541e-02      | 0.98             | 6.708e-01         | 1.446             |              |                   |                  |
| ≥ 59.9                    | 31              | 31            | 100.00        | 3.862 | 2.196         | 6.791         | 2.712e-06      | 0.40             | 1.697e-01         | 9.008e-01         |              |                   |                  |
| <b>Profile Likelihood</b> |                 |               |               |       |               |               |                |                  |                   |                   |              |                   |                  |
| <56.2                     | 48              | 39            | 81.25         | ----  | ----          | ----          | ----           | 1.34             | 1.087             | 2.070             | 5.56e-06     | 2.15e-06          | 9.35e-02         |
| ≥56.2                     | 46              | 44            | 95.65         | 2.869 | 1.823         | 4.516         | 5.247e-06      | 0.56             | 3.313e-01         | 8.624e-01         |              |                   |                  |
| <b>Quantitative</b>       | 94              | 83            | 88.30         | 1.040 | 1.022         | 1.058         | 1.192e-05      |                  |                   |                   | 1.071e-05    | 1.045e-05         |                  |

**Cohort: Derivation**  
**Outcome: Progression Free Survival by DLCO ( Lung Transplant counts as event )**  
**Predictor: MMP7 ( ng / mL )**

|                           | Patients<br>(N) | Events<br>(n) | Events<br>(%) | HR        | HR<br>95% LCL | HR<br>95% UCL | Wald<br>pvalue | Median<br>(yrs.) | Median<br>95% LCL | Median<br>95% UCL | LR<br>pvalue | Logrank<br>pvalue | DevLIN<br>pvalue |
|---------------------------|-----------------|---------------|---------------|-----------|---------------|---------------|----------------|------------------|-------------------|-------------------|--------------|-------------------|------------------|
| <b>Quintiles</b>          |                 |               |               |           |               |               |                |                  |                   |                   |              |                   |                  |
| < 2.7                     | 26              | 23            | 88.46         | ----      | ----          | ----          | ----           | 1.06             | 4.736e-01         | 1.744             | 5.64e-01     | 5.81e-01          | 5.28e-01         |
| [ 2.7,3.76)               | 23              | 20            | 86.96         | 7.291e-01 | 3.988e-01     | 1.333         | 3.046e-01      | 0.99             | 7.502e-01         | 2.970             |              |                   |                  |
| [ 3.76,4.99)              | 27              | 25            | 92.59         | 1.064     | 5.977e-01     | 1.896         | 8.319e-01      | 0.80             | 4.791e-01         | 1.112             |              |                   |                  |
| [ 4.99,6.41)              | 26              | 24            | 92.31         | 1.196     | 6.741e-01     | 2.121         | 5.410e-01      | 0.53             | 3.313e-01         | 1.582             |              |                   |                  |
| ≥ 6.41                    | 26              | 24            | 92.31         | 9.877e-01 | 5.563e-01     | 1.754         | 9.664e-01      | 0.86             | 6.407e-01         | 2.111             |              |                   |                  |
| <b>Quartiles</b>          |                 |               |               |           |               |               |                |                  |                   |                   |              |                   |                  |
| < 2.92                    | 32              | 29            | 90.62         | ----      | ----          | ----          | ----           | 1.14             | 6.626e-01         | 1.744             | 5.05e-01     | 5.11e-01          | 6.25e-01         |
| [ 2.92,4.3)               | 30              | 26            | 86.67         | 8.391e-01 | 4.889e-01     | 1.440         | 5.243e-01      | 0.80             | 7.010e-01         | 2.341             |              |                   |                  |
| [ 4.3,5.73)               | 33              | 30            | 90.91         | 1.239     | 7.424e-01     | 2.068         | 4.123e-01      | 0.57             | 4.791e-01         | 1.446             |              |                   |                  |
| ≥ 5.73                    | 33              | 31            | 93.94         | 1.130     | 6.797e-01     | 1.880         | 6.368e-01      | 0.90             | 6.407e-01         | 1.582             |              |                   |                  |
| <b>Tertiles</b>           |                 |               |               |           |               |               |                |                  |                   |                   |              |                   |                  |
| < 3.51                    | 43              | 37            | 86.05         | ----      | ----          | ----          | ----           | 1.33             | 7.091e-01         | 2.070             | 2.57e-01     | 2.62e-01          | 3.50e-01         |
| [ 3.51,5.35)              | 42              | 39            | 92.86         | 1.447     | 9.169e-01     | 2.284         | 1.125e-01      | 0.67             | 5.010e-01         | 9.062e-01         |              |                   |                  |
| ≥ 5.35                    | 43              | 40            | 93.02         | 1.297     | 8.274e-01     | 2.033         | 2.568e-01      | 0.95             | 6.407e-01         | 1.582             |              |                   |                  |
| <b>Profile Likelihood</b> |                 |               |               |           |               |               |                |                  |                   |                   |              |                   |                  |
| < 3.9                     | 52              | 45            | 86.54         | ----      | ----          | ----          | ----           | 0.99             | 7.173e-01         | 1.744             | 3.45e-02     | 3.57e-02          | 2.71e-02         |
| ≥ 3.9                     | 76              | 71            | 93.42         | 1.497     | 1.025         | 2.187         | 3.678e-02      | 0.84             | 5.749e-01         | 1.035             |              |                   |                  |
| <b>Quantitative</b>       |                 |               |               |           |               |               |                |                  |                   |                   |              |                   |                  |
|                           | 128             | 116           | 90.62         | 1.026     | 0.963         | 1.093         | 4.271e-01      |                  |                   |                   | 4.337e-01    | 4.271e-01         |                  |



**Cohort: Derivation**  
**Outcome: Progression Free Survival by DLCO ( Lung Transplant counts as event )**  
**Predictor: ICAM1 ( ng / mL )**

|                           | Patients<br>(N) | Events<br>(n) | Events<br>(%) | HR    | HR<br>95% LCL | HR<br>95% UCL | Wald<br>pvalue | Median<br>(yrs.) | Median<br>95% LCL | Median<br>95% UCL | LR<br>pvalue | Logrank<br>pvalue | DevLIN<br>pvalue |
|---------------------------|-----------------|---------------|---------------|-------|---------------|---------------|----------------|------------------|-------------------|-------------------|--------------|-------------------|------------------|
| <b>Quintiles</b>          |                 |               |               |       |               |               |                |                  |                   |                   |              |                   |                  |
| < 158                     | 27              | 24            | 88.89         | ----  | ----          | ----          | ----           | 1.14             | 7.173e-01         | 2.070             | 6.04e-01     | 5.87e-01          | 4.72e-01         |
| [ 158,205)                | 26              | 22            | 84.62         | 1.080 | 6.049e-01     | 1.930         | 7.940e-01      | 0.85             | 7.010e-01         | 2.242             |              |                   |                  |
| [ 205,252)                | 27              | 25            | 92.59         | 1.354 | 7.723e-01     | 2.374         | 2.900e-01      | 0.62             | 4.079e-01         | 1.821             |              |                   |                  |
| [ 252,351)                | 27              | 25            | 92.59         | 1.426 | 8.130e-01     | 2.500         | 2.159e-01      | 0.77             | 4.408e-01         | 1.333             |              |                   |                  |
| ≥ 351                     | 28              | 26            | 92.86         | 1.004 | 5.689e-01     | 1.771         | 9.900e-01      | 0.84             | 4.791e-01         | 2.111             |              |                   |                  |
| <b>Quartiles</b>          |                 |               |               |       |               |               |                |                  |                   |                   |              |                   |                  |
| < 175                     | 32              | 28            | 87.50         | ----  | ----          | ----          | ----           | 1.13             | 7.173e-01         | 2.070             | 3.86e-01     | 3.70e-01          | 2.94e-01         |
| [ 175,230)                | 35              | 32            | 91.43         | 1.558 | 9.352e-01     | 2.596         | 8.857e-02      | 0.75             | 5.558e-01         | 9.008e-01         |              |                   |                  |
| [ 230,318)                | 33              | 29            | 87.88         | 1.190 | 7.075e-01     | 2.003         | 5.115e-01      | 0.91             | 4.079e-01         | 1.673             |              |                   |                  |
| ≥ 318                     | 35              | 33            | 94.29         | 1.141 | 6.836e-01     | 1.904         | 6.141e-01      | 0.84             | 6.407e-01         | 1.714             |              |                   |                  |
| <b>Tertiles</b>           |                 |               |               |       |               |               |                |                  |                   |                   |              |                   |                  |
| < 197                     | 46              | 40            | 86.96         | ----  | ----          | ----          | ----           | 1.05             | 8.433e-01         | 2.064             | 3.44e-01     | 3.40e-01          | 3.38e-01         |
| [ 197,274)                | 43              | 39            | 90.70         | 1.388 | 8.919e-01     | 2.159         | 1.463e-01      | 0.70             | 4.983e-01         | 1.035             |              |                   |                  |
| ≥ 274                     | 46              | 43            | 93.48         | 1.205 | 7.790e-01     | 1.864         | 4.021e-01      | 0.84             | 5.284e-01         | 1.473             |              |                   |                  |
| <b>Profile Likelihood</b> |                 |               |               |       |               |               |                |                  |                   |                   |              |                   |                  |
| <184.5                    | 41              | 36            | 87.80         | ----  | ----          | ----          | ----           | 1.11             | 8.433e-01         | 2.070             | 1.39e-01     | 1.44e-01          | 9.90e-02         |
| ≥184.5                    | 94              | 86            | 91.49         | 1.337 | 9.039e-01     | 1.978         | 1.458e-01      | 0.82             | 5.941e-01         | 9.774e-01         |              |                   |                  |
| <b>Quantitative</b>       | 135             | 122           | 90.37         | 1.000 | 9.989e-01     | 1.002         | 7.367e-01      |                  |                   |                   | 7.385e-01    | 7.367e-01         |                  |

Cohort: **Derivation**

Outcome: **Progression Free Survival by DLCO ( Lung Transplant counts as event )**

Predictor: **IL8 ( ng / mL )**

|                           | Patients<br>(N) | Events<br>(n) | Events<br>(%) | HR        | HR<br>95% LCL | HR<br>95% UCL | Wald<br>pvalue | Median<br>(yrs.) | Median<br>95% LCL | Median<br>95% UCL | LR<br>pvalue | Logrank<br>pvalue | DevLIN<br>pvalue |
|---------------------------|-----------------|---------------|---------------|-----------|---------------|---------------|----------------|------------------|-------------------|-------------------|--------------|-------------------|------------------|
| <b>Quintiles</b>          |                 |               |               |           |               |               |                |                  |                   |                   |              |                   |                  |
| < 0.0051                  | 25              | 22            | 88.00         | ----      | ----          | ----          | ----           | 1.25             | 5.558e-01         | 2.242             | 3.01e-03     | 1.70e-03          | 3.33e-02         |
| [ 0.0051,0.00776)         | 27              | 20            | 74.07         | 2.111     | 1.194         | 3.731         | 1.017e-02      | 1.23             | 8.405e-01         |                   |              |                   |                  |
| [ 0.00776,0.00968)        | 28              | 27            | 96.43         | 6.554e-01 | 3.538e-01     | 1.214         | 1.793e-01      | 0.84             | 4.081e-01         | 2.352             |              |                   |                  |
| [ 0.00968,0.013)          | 27              | 26            | 96.30         | 1.040     | 5.906e-01     | 1.832         | 8.914e-01      | 0.84             | 6.407e-01         | 1.673             |              |                   |                  |
| ≥ 0.013                   | 28              | 27            | 96.43         | 1.338     | 7.561e-01     | 2.366         | 3.176e-01      | 0.53             | 1.477e-01         | 1.087             |              |                   |                  |
| <b>Quartiles</b>          |                 |               |               |           |               |               |                |                  |                   |                   |              |                   |                  |
| < 0.0056                  | 32              | 28            | 87.50         | ----      | ----          | ----          | ----           | 1.11             | 4.983e-01         | 2.064             | 6.37e-05     | 7.84e-05          | 7.52e-04         |
| [ 0.0056,0.0087)          | 31              | 24            | 77.42         | 1.809     | 1.111         | 2.946         | 1.716e-02      | 2.03             | 9.856e-01         | 4.153             |              |                   |                  |
| [ 0.0087,0.011)           | 29              | 29            | 100.00        | 5.449e-01 | 3.103e-01     | 9.569e-01     | 3.458e-02      | 0.72             | 5.010e-01         | 8.624e-01         |              |                   |                  |
| ≥ 0.011                   | 43              | 41            | 95.35         | 1.331     | 7.898e-01     | 2.242         | 2.831e-01      | 0.64             | 3.450e-01         | 9.774e-01         |              |                   |                  |
| <b>Tertiles</b>           |                 |               |               |           |               |               |                |                  |                   |                   |              |                   |                  |
| < 0.0066                  | 41              | 34            | 82.93         | ----      | ----          | ----          | ----           | 1.33             | 5.558e-01         | 2.064             | 1.86e-03     | 9.42e-04          | 2.36e-02         |
| [ 0.0066,0.00997)         | 48              | 44            | 91.67         | 1.000     | 6.352e-01     | 1.574         | 9.999e-01      | 0.86             | 7.940e-01         | 2.111             |              |                   |                  |
| ≥ 0.00997                 | 46              | 44            | 95.65         | 2.054     | 1.299         | 3.246         | 2.059e-03      | 0.64             | 3.450e-01         | 9.774e-01         |              |                   |                  |
| <b>Profile Likelihood</b> |                 |               |               |           |               |               |                |                  |                   |                   |              |                   |                  |
| < 0.0086                  | 63              | 52            | 82.54         | ----      | ----          | ----          | ----           | 1.25             | 9.500e-01         | 2.070             | 6.23e-05     | 5.39e-05          | 9.24e-04         |
| ≥ 0.0086                  | 72              | 70            | 97.22         | 2.121     | 1.462         | 3.076         | 7.516e-05      | 0.67             | 5.010e-01         | 8.598e-01         |              |                   |                  |
| <b>Quantitative*</b>      | 135             | 122           | 90.37         | 1.023     | 1.007         | 1.038         | 3.587e-03      |                  |                   |                   | 1.765e-02    | 2.720e-03         |                  |

\*Units of pg / mL were used in **Quantitative model only**.

**Cohort: Derivation**  
**Outcome: Progression Free Survival by DLCO ( Lung Transplant counts as event )**  
**Predictor: VCAM1 ( ng / mL )**

|                           | Patients<br>(N) | Events<br>(n) | Events<br>(%) | HR        | HR<br>95% LCL | HR<br>95% UCL | Wald<br>pvalue | Median<br>(yrs.) | Median<br>95% LCL | Median<br>95% UCL | LR<br>pvalue | Logrank<br>pvalue | DevLIN<br>pvalue |
|---------------------------|-----------------|---------------|---------------|-----------|---------------|---------------|----------------|------------------|-------------------|-------------------|--------------|-------------------|------------------|
| <b>Quintiles</b>          |                 |               |               |           |               |               |                |                  |                   |                   |              |                   |                  |
| < 335                     | 26              | 23            | 88.46         | ----      | ----          | ----          | ----           | 0.99             | 5.830e-01         | 1.744             | 7.13e-02     | 8.45e-02          | 9.85e-02         |
| [ 335,402)                | 27              | 24            | 88.89         | 6.076e-01 | 3.391e-01     | 1.089         | 9.412e-02      | 2.03             | 9.062e-01         | 2.664             |              |                   |                  |
| [ 402,457)                | 29              | 26            | 89.66         | 1.136     | 6.446e-01     | 2.001         | 6.596e-01      | 0.70             | 4.791e-01         | 1.035             |              |                   |                  |
| [ 457,572)                | 28              | 26            | 92.86         | 1.318     | 7.479e-01     | 2.324         | 3.394e-01      | 0.44             | 2.930e-01         | 1.087             |              |                   |                  |
| ≥ 572                     | 25              | 23            | 92.00         | 1.034     | 5.771e-01     | 1.852         | 9.112e-01      | 0.95             | 5.941e-01         | 1.947             |              |                   |                  |
| <b>Quartiles</b>          |                 |               |               |           |               |               |                |                  |                   |                   |              |                   |                  |
| < 359                     | 34              | 31            | 91.18         | ----      | ----          | ----          | ----           | 1.14             | 6.407e-01         | 1.821             | 2.50e-02     | 2.82e-02          | 6.15e-02         |
| [ 359,419)                | 32              | 27            | 84.38         | 6.559e-01 | 3.873e-01     | 1.111         | 1.165e-01      | 1.03             | 8.405e-01         | 2.645             |              |                   |                  |
| [ 419,518)                | 37              | 35            | 94.59         | 1.380     | 8.468e-01     | 2.250         | 1.961e-01      | 0.49             | 4.079e-01         | 9.008e-01         |              |                   |                  |
| ≥ 518                     | 32              | 29            | 90.62         | 1.208     | 7.258e-01     | 2.011         | 4.671e-01      | 0.84             | 3.450e-01         | 1.473             |              |                   |                  |
| <b>Tertiles</b>           |                 |               |               |           |               |               |                |                  |                   |                   |              |                   |                  |
| < 378                     | 46              | 40            | 86.96         | ----      | ----          | ----          | ----           | 1.14             | 8.049e-01         | 1.744             | 5.90e-01     | 5.94e-01          | 8.57e-01         |
| [ 378,480)                | 45              | 42            | 93.33         | 1.166     | 7.523e-01     | 1.806         | 4.927e-01      | 0.71             | 4.791e-01         | 1.112             |              |                   |                  |
| ≥ 480                     | 44              | 40            | 90.91         | 1.251     | 8.054e-01     | 1.943         | 3.189e-01      | 0.84             | 4.408e-01         | 1.342             |              |                   |                  |
| <b>Profile Likelihood</b> |                 |               |               |           |               |               |                |                  |                   |                   |              |                   |                  |
| < 418.0                   | 66              | 58            | 87.88         | ----      | ----          | ----          | ----           | 1.14             | 8.433e-01         | 2.034             | 1.03e-02     | 9.68e-03          | 3.30e-02         |
| ≥ 418.0                   | 69              | 64            | 92.75         | 1.604     | 1.118         | 2.302         | 1.035e-02      | 0.70             | 4.353e-01         | 9.008e-01         |              |                   |                  |
| <b>Quantitative</b>       |                 |               |               |           |               |               |                |                  |                   |                   |              |                   |                  |
|                           | 135             | 122           | 90.37         | 1.001     | 9.998e-01     | 1.002         | 1.208e-01      |                  |                   |                   | 1.379e-01    | 1.205e-01         |                  |

**Cohort: Derivation**  
**Outcome: Progression Free Survival by DLCO ( Lung Transplant counts as event )**  
**Predictor: S100A12 ( ng / mL )**

|                           | Patients<br>(N) | Events<br>(n) | Events<br>(%) | HR        | HR<br>95% LCL | HR<br>95% UCL | Wald<br>pvalue | Median<br>(yrs.) | Median<br>95% LCL | Median<br>95% UCL | LR<br>pvalue | Logrank<br>pvalue | DevLIN<br>pvalue |
|---------------------------|-----------------|---------------|---------------|-----------|---------------|---------------|----------------|------------------|-------------------|-------------------|--------------|-------------------|------------------|
| <b>Quintiles</b>          |                 |               |               |           |               |               |                |                  |                   |                   |              |                   |                  |
| < 15                      | 26              | 23            | 88.46         | ----      | ----          | ----          | ----           | 1.37             | 8.049e-01         | 2.341             | 2.66e-02     | 1.22e-02          | 3.04e-02         |
| [ 15,21.6)                | 29              | 24            | 82.76         | 1.246     | 7.005e-01     | 2.216         | 4.542e-01      | 0.95             | 7.010e-01         | 1.821             |              |                   |                  |
| [ 21.6,29)                | 26              | 23            | 88.46         | 1.042     | 5.823e-01     | 1.865         | 8.897e-01      | 1.03             | 5.941e-01         | 2.431             |              |                   |                  |
| [ 29,51)                  | 26              | 26            | 100.00        | 2.445     | 1.376         | 4.344         | 2.305e-03      | 0.59             | 3.532e-01         | 8.624e-01         |              |                   |                  |
| ≥ 51                      | 28              | 26            | 92.86         | 1.304     | 7.393e-01     | 2.301         | 3.592e-01      | 0.84             | 3.313e-01         | 2.127             |              |                   |                  |
| <b>Quartiles</b>          |                 |               |               |           |               |               |                |                  |                   |                   |              |                   |                  |
| < 17.8                    | 34              | 31            | 91.18         | ----      | ----          | ----          | ----           | 1.01             | 8.433e-01         | 1.947             | 1.36e-01     | 1.24e-01          | 1.54e-01         |
| [ 17.8,25)                | 34              | 27            | 79.41         | 8.929e-01 | 5.321e-01     | 1.498         | 6.680e-01      | 1.12             | 7.010e-01         | 2.242             |              |                   |                  |
| [ 25,45.2)                | 34              | 33            | 97.06         | 1.568     | 9.563e-01     | 2.572         | 7.461e-02      | 0.64             | 4.873e-01         | 8.624e-01         |              |                   |                  |
| ≥ 45.2                    | 33              | 31            | 93.94         | 1.257     | 7.601e-01     | 2.079         | 3.729e-01      | 0.84             | 3.614e-01         | 1.473             |              |                   |                  |
| <b>Tertiles</b>           |                 |               |               |           |               |               |                |                  |                   |                   |              |                   |                  |
| < 19                      | 39              | 35            | 89.74         | ----      | ----          | ----          | ----           | 0.98             | 8.350e-01         | 1.947             | 2.05e-01     | 1.90e-01          | 1.68e-01         |
| [ 19,37)                  | 51              | 44            | 86.27         | 9.798e-01 | 6.269e-01     | 1.531         | 9.288e-01      | 0.91             | 5.941e-01         | 1.402             |              |                   |                  |
| ≥ 37                      | 45              | 43            | 95.56         | 1.401     | 8.936e-01     | 2.197         | 1.416e-01      | 0.79             | 4.983e-01         | 1.087             |              |                   |                  |
| <b>Profile Likelihood</b> |                 |               |               |           |               |               |                |                  |                   |                   |              |                   |                  |
| < 25.5                    | 71              | 60            | 84.51         | ----      | ----          | ----          | ----           | 1.12             | 8.598e-01         | 1.821             | 3.50e-03     | 2.98e-03          | 1.41e-03         |
| ≥ 25.5                    | 64              | 62            | 96.88         | 1.714     | 1.196         | 2.457         | 3.347e-03      | 0.64             | 4.873e-01         | 8.624e-01         |              |                   |                  |
| <b>Quantitative</b>       |                 |               |               |           |               |               |                |                  |                   |                   |              |                   |                  |
|                           | 135             | 122           | 90.37         | 1.001     | 9.974e-01     | 1.005         | 5.518e-01      |                  |                   |                   | 5.648e-01    | 5.514e-01         |                  |

**Cohort: Derivation**

**Outcome: Progression Free Survival by CPI ( Lung Transplant counts as event )**

**Predictor: Age (years)**

|                           | Patients<br>(N) | Events<br>(n) | Events<br>(%) | HR        | HR<br>95% LCL | HR<br>95% UCL | Wald<br>pvalue | Median<br>(yrs.) | Median<br>95% LCL | Median<br>95% UCL | LR<br>pvalue | Logrank<br>pvalue | DevLIN<br>pvalue |
|---------------------------|-----------------|---------------|---------------|-----------|---------------|---------------|----------------|------------------|-------------------|-------------------|--------------|-------------------|------------------|
| <b>Quintiles</b>          |                 |               |               |           |               |               |                |                  |                   |                   |              |                   |                  |
| < 59.5                    | 26              | 23            | 88.46         | ----      | ----          | ----          | ----           | 0.56             | 4.025e-01         | 1.673             | 6.57e-01     | 6.35e-01          | 5.53e-01         |
| [ 59.5,66.1)              | 28              | 24            | 85.71         | 1.295     | 7.266e-01     | 2.308         | 3.807e-01      | 0.67             | 3.587e-01         | 1.744             |              |                   |                  |
| [ 66.1,69.7)              | 27              | 25            | 92.59         | 9.473e-01 | 5.329e-01     | 1.684         | 8.536e-01      | 0.98             | 7.173e-01         | 2.223             |              |                   |                  |
| [ 69.7,73.9)              | 26              | 25            | 96.15         | 9.968e-01 | 5.624e-01     | 1.767         | 9.914e-01      | 0.86             | 8.049e-01         | 2.070             |              |                   |                  |
| ≥ 73.9                    | 28              | 25            | 89.29         | 8.306e-01 | 4.701e-01     | 1.468         | 5.228e-01      | 1.14             | 6.407e-01         | 2.606             |              |                   |                  |
| <b>Quartiles</b>          |                 |               |               |           |               |               |                |                  |                   |                   |              |                   |                  |
| < 61.2                    | 33              | 28            | 84.85         | ----      | ----          | ----          | ----           | 0.62             | 4.408e-01         | 1.673             | 6.57e-01     | 6.48e-01          | 3.56e-01         |
| [ 61.2,68.5)              | 34              | 31            | 91.18         | 1.109     | 6.624e-01     | 1.856         | 6.945e-01      | 0.84             | 4.079e-01         | 1.112             |              |                   |                  |
| [ 68.5,73.3)              | 35              | 33            | 94.29         | 8.272e-01 | 4.972e-01     | 1.376         | 4.653e-01      | 0.99             | 8.350e-01         | 2.078             |              |                   |                  |
| ≥ 73.3                    | 33              | 30            | 90.91         | 8.737e-01 | 5.207e-01     | 1.466         | 6.090e-01      | 0.90             | 6.626e-01         | 2.300             |              |                   |                  |
| <b>Tertiles</b>           |                 |               |               |           |               |               |                |                  |                   |                   |              |                   |                  |
| < 64.7                    | 45              | 39            | 86.67         | ----      | ----          | ----          | ----           | 0.75             | 4.736e-01         | 1.333             | 8.23e-01     | 8.16e-01          | 1.54e-01         |
| [ 64.7,71.3)              | 45              | 41            | 91.11         | 8.768e-01 | 5.633e-01     | 1.365         | 5.601e-01      | 0.95             | 7.010e-01         | 2.078             |              |                   |                  |
| ≥ 71.3                    | 45              | 42            | 93.33         | 8.947e-01 | 5.777e-01     | 1.386         | 6.180e-01      | 0.86             | 7.392e-01         | 1.596             |              |                   |                  |
| <b>Profile Likelihood</b> |                 |               |               |           |               |               |                |                  |                   |                   |              |                   |                  |
| <65.5                     | 51              | 45            | 88.24         | ----      | ----          | ----          | ----           | 0.50             | 4.025e-01         | 1.087             | 1.12e-01     | 1.03e-01          | 3.76e-01         |
| ≥65.5                     | 84              | 77            | 91.67         | 7.373e-01 | 5.090e-01     | 1.068         | 1.068e-01      | 0.96             | 8.433e-01         | 1.473             |              |                   |                  |
| <b>Quantitative</b>       |                 |               |               |           |               |               |                |                  |                   |                   |              |                   |                  |
|                           | 135             | 122           | 90.37         | 9.838e-01 | 9.602e-01     | 1.008         | 1.844e-01      |                  |                   |                   | 1.863e-01    | 1.840e-01         |                  |
| <b>Predictor: Gender</b>  |                 |               |               |           |               |               |                |                  |                   |                   |              |                   |                  |
| Female                    | 36              | 31            | 86.11         | ----      | ----          | ----          | ----           | 1.28             | 0.862             | 2.22              |              |                   |                  |
| Male                      | 99              | 91            | 91.92         | 1.30      | 0.861         | 1.952         | 2.14E-01       | 0.82             | 0.671             | 0.98              | 2.05E-01     | 2.12E-01          |                  |

Cohort: **Derivation**

Outcome: **Progression Free Survival by CPI ( Lung Transplant counts as event )**

Predictor: **Baseline (4-month) FVC % Predicted**

|                           | Patients<br>(N) | Events<br>(n) | Events<br>(%) | HR        | HR<br>95% LCL | HR<br>95% UCL | Wald<br>pvalue | Median<br>(yrs.) | Median<br>95% LCL | Median<br>95% UCL | LR<br>pvalue | Logrank<br>pvalue | DevLIN<br>pvalue |
|---------------------------|-----------------|---------------|---------------|-----------|---------------|---------------|----------------|------------------|-------------------|-------------------|--------------|-------------------|------------------|
| <b>Quintiles</b>          |                 |               |               |           |               |               |                |                  |                   |                   |              |                   |                  |
| < 43.3                    | 24              | 23            | 95.83         | ----      | ----          | ----          | ----           | 0.40             | 1.533e-01         | 8.598e-01         | 1.14e-03     | 1.60e-03          | 6.68e-02         |
| [ 43.3,56.6)              | 24              | 22            | 91.67         | 6.491e-01 | 3.605e-01     | 1.169         | 1.498e-01      | 0.72             | 4.873e-01         | 2.223             |              |                   |                  |
| [ 56.6,66)                | 23              | 20            | 86.96         | 6.405e-01 | 3.511e-01     | 1.168         | 1.462e-01      | 0.84             | 7.091e-01         | 1.648             |              |                   |                  |
| [ 66,77)                  | 22              | 21            | 95.45         | 6.504e-01 | 3.590e-01     | 1.179         | 1.561e-01      | 1.25             | 6.708e-01         | 1.744             |              |                   |                  |
| ≥ 77                      | 25              | 20            | 80.00         | 2.688e-01 | 1.409e-01     | 5.129e-01     | 6.735e-05      | 1.47             | 1.087             | 4.153             |              |                   |                  |
| <b>Quartiles</b>          |                 |               |               |           |               |               |                |                  |                   |                   |              |                   |                  |
| < 47.8                    | 30              | 29            | 96.67         | ----      | ----          | ----          | ----           | 0.38             | 2.300e-01         | 8.598e-01         | 6.97e-04     | 8.12e-04          | 8.38e-02         |
| [ 47.8,61.1)              | 30              | 26            | 86.67         | 6.382e-01 | 3.740e-01     | 1.089         | 9.943e-02      | 0.86             | 6.186e-01         | 1.284             |              |                   |                  |
| [ 61.1,74)                | 28              | 26            | 92.86         | 7.352e-01 | 4.317e-01     | 1.252         | 2.574e-01      | 0.91             | 7.091e-01         | 1.596             |              |                   |                  |
| ≥ 74                      | 30              | 25            | 83.33         | 3.221e-01 | 1.822e-01     | 5.695e-01     | 9.757e-05      | 1.57             | 1.087             | 2.970             |              |                   |                  |
| <b>Tertiles</b>           |                 |               |               |           |               |               |                |                  |                   |                   |              |                   |                  |
| < 52.8                    | 40              | 38            | 95.00         | ----      | ----          | ----          | ----           | 0.58             | 3.285e-01         | 9.008e-01         | 4.63e-04     | 3.61e-04          | 8.40e-02         |
| [ 52.8,69.9)              | 40              | 35            | 87.50         | 6.462e-01 | 4.070e-01     | 1.026         | 6.423e-02      | 0.86             | 7.010e-01         | 1.596             |              |                   |                  |
| ≥ 69.9                    | 38              | 33            | 86.84         | 3.752e-01 | 2.285e-01     | 6.162e-01     | 1.076e-04      | 1.42             | 1.087             | 2.502             |              |                   |                  |
| <b>Profile Likelihood</b> |                 |               |               |           |               |               |                |                  |                   |                   |              |                   |                  |
| < 76.9                    | 93              | 86            | 92.47         | ----      | ----          | ----          | ----           | 0.80             | 6.626e-01         | 9.391e-01         | 9.60e-05     | 2.38e-04          | 2.56e-02         |
| ≥ 76.9                    | 25              | 20            | 80.00         | 3.781e-01 | 2.211e-01     | 6.467e-01     | 3.821e-04      | 1.47             | 1.087             | 4.153             |              |                   |                  |
| <b>Quantitative</b>       | 118             | 106           | 89.83         | 9.824e-01 | 9.720e-01     | 9.930e-01     | 1.210e-03      |                  |                   |                   | 1.031e-03    | 1.182e-03         |                  |

Cohort: Derivation

Outcome: Progression Free Survival by CPI ( Lung Transplant counts as event )

Predictor: Baseline (4-month) DLco % Predicted

|                           | Patients<br>(N) | Events<br>(n) | Events<br>(%) | HR        | HR<br>95% LCL | HR<br>95% UCL | Wald<br>pvalue | Median<br>(yrs.) | Median<br>95% LCL | Median<br>95% UCL | LR<br>pvalue | Logrank<br>pvalue | DevLIN<br>pvalue |
|---------------------------|-----------------|---------------|---------------|-----------|---------------|---------------|----------------|------------------|-------------------|-------------------|--------------|-------------------|------------------|
| <b>Quintiles</b>          |                 |               |               |           |               |               |                |                  |                   |                   |              |                   |                  |
| < 28.9                    | 21              | 20            | 95.24         | ----      | ----          | ----          | ----           | 0.58             | 9.035e-02         | 9.500e-01         | 2.00e-03     | 8.82e-04          | 6.36e-01         |
| [ 28.9,39)                | 22              | 20            | 90.91         | 6.228e-01 | 3.319e-01     | 1.169         | 1.405e-01      | 0.99             | 2.930e-01         | 1.673             |              |                   |                  |
| [ 39,49.4)                | 21              | 19            | 90.48         | 4.621e-01 | 2.446e-01     | 8.730e-01     | 1.739e-02      | 0.93             | 7.091e-01         | 2.341             |              |                   |                  |
| [ 49.4,60)                | 20              | 18            | 90.00         | 3.567e-01 | 1.846e-01     | 6.893e-01     | 2.163e-03      | 1.25             | 8.049e-01         | 2.850             |              |                   |                  |
| ≥ 60                      | 22              | 17            | 77.27         | 2.609e-01 | 1.297e-01     | 5.245e-01     | 1.628e-04      | 1.47             | 8.433e-01         |                   |              |                   |                  |
| <b>Quartiles</b>          |                 |               |               |           |               |               |                |                  |                   |                   |              |                   |                  |
| < 31.6                    | 26              | 25            | 96.15         | ----      | ----          | ----          | ----           | 0.83             | 2.300e-01         | 1.402             | 1.45e-03     | 1.03e-03          | 4.40e-01         |
| [ 31.6,43.8)              | 27              | 25            | 92.59         | 1.008     | 5.781e-01     | 1.758         | 9.769e-01      | 0.71             | 3.751e-01         | 1.087             |              |                   |                  |
| [ 43.8,57)                | 25              | 22            | 88.00         | 4.695e-01 | 2.623e-01     | 8.405e-01     | 1.093e-02      | 1.60             | 8.624e-01         | 2.519             |              |                   |                  |
| ≥ 57                      | 28              | 22            | 78.57         | 3.976e-01 | 2.179e-01     | 7.255e-01     | 2.647e-03      | 1.33             | 8.433e-01         | 2.645             |              |                   |                  |
| <b>Tertiles</b>           |                 |               |               |           |               |               |                |                  |                   |                   |              |                   |                  |
| < 36.6                    | 35              | 33            | 94.29         | ----      | ----          | ----          | ----           | 0.58             | 2.546e-01         | 9.391e-01         | 2.40e-03     | 1.28e-03          | 7.48e-01         |
| [ 36.6,53.4)              | 37              | 33            | 89.19         | 5.421e-01 | 3.336e-01     | 8.807e-01     | 1.340e-02      | 1.16             | 8.624e-01         | 1.947             |              |                   |                  |
| ≥ 53.4                    | 34              | 28            | 82.35         | 3.998e-01 | 2.365e-01     | 6.760e-01     | 6.224e-04      | 1.14             | 8.049e-01         | 2.645             |              |                   |                  |
| <b>Profile Likelihood</b> |                 |               |               |           |               |               |                |                  |                   |                   |              |                   |                  |
| <42.7                     | 53              | 50            | 94.34         | ----      | ----          | ----          | ----           | 0.74             | 4.081e-01         | 9.500e-01         | 9.71e-05     | 6.34e-05          | 1.75e-01         |
| ≥42.7                     | 53              | 44            | 83.02         | 4.310e-01 | 2.820e-01     | 6.588e-01     | 1.008e-04      | 1.47             | 1.035             | 2.341             |              |                   |                  |
| <b>Quantitative</b>       | 106             | 94            | 88.68         | 9.746e-01 | 9.617e-01     | 9.878e-01     | 1.665e-04      |                  |                   |                   | 1.398e-04    | 1.479e-04         |                  |

Cohort: **Derivation**

Outcome: **Progression Free Survival by CPI ( Lung Transplant counts as event )**

Predictor: **Baseline (4-month) CPI**

|                           | Patients<br>(N) | Events<br>(n) | Events<br>(%) | HR    | HR<br>95% LCL | HR<br>95% UCL | Wald<br>pvalue | Median<br>(yrs.) | Median<br>95% LCL | Median<br>95% UCL | LR<br>pvalue | Logrank<br>pvalue | DevLIN<br>pvalue |
|---------------------------|-----------------|---------------|---------------|-------|---------------|---------------|----------------|------------------|-------------------|-------------------|--------------|-------------------|------------------|
| <b>Quintiles</b>          |                 |               |               |       |               |               |                |                  |                   |                   |              |                   |                  |
| < 43                      | 22              | 17            | 77.27         | ----  | ----          | ----          | ----           | 1.47             | 1.035             |                   | 3.76e-03     | 2.71e-03          | 7.14e-01         |
| [ 43,50.8)                | 20              | 18            | 90.00         | 1.197 | 6.087e-01     | 2.352         | 6.028e-01      | 1.14             | 8.624e-01         | 3.261             |              |                   |                  |
| [ 50.8,58.7)              | 21              | 19            | 90.48         | 1.864 | 9.445e-01     | 3.681         | 7.260e-02      | 1.23             | 6.186e-01         | 1.673             |              |                   |                  |
| [ 58.7,64.5)              | 22              | 20            | 90.91         | 2.595 | 1.324         | 5.087         | 5.502e-03      | 0.71             | 5.010e-01         | 1.396             |              |                   |                  |
| ≥ 64.5                    | 21              | 20            | 95.24         | 3.008 | 1.536         | 5.889         | 1.316e-03      | 0.40             | 8.761e-02         | 1.714             |              |                   |                  |
| <b>Quartiles</b>          |                 |               |               |       |               |               |                |                  |                   |                   |              |                   |                  |
| < 44.4                    | 25              | 20            | 80.00         | ----  | ----          | ----          | ----           | 1.47             | 1.035             | 2.645             | 7.84e-04     | 2.15e-04          | 3.36e-01         |
| [ 44.4,56)                | 27              | 24            | 88.89         | 1.188 | 6.489e-01     | 2.175         | 5.767e-01      | 1.23             | 8.433e-01         | 2.519             |              |                   |                  |
| [ 56,62.7)                | 27              | 24            | 88.89         | 1.766 | 9.553e-01     | 3.263         | 6.969e-02      | 0.98             | 7.392e-01         | 1.673             |              |                   |                  |
| ≥ 62.7                    | 27              | 26            | 96.30         | 3.239 | 1.768         | 5.935         | 1.417e-04      | 0.33             | 1.477e-01         | 9.008e-01         |              |                   |                  |
| <b>Tertiles</b>           |                 |               |               |       |               |               |                |                  |                   |                   |              |                   |                  |
| < 47.7                    | 34              | 28            | 82.35         | ----  | ----          | ----          | ----           | 1.33             | 1.035             | 2.491             | 7.68e-04     | 3.48e-04          | 4.30e-01         |
| [ 47.7,59.8)              | 37              | 32            | 86.49         | 1.403 | 8.288e-01     | 2.374         | 2.075e-01      | 1.23             | 8.624e-01         | 1.703             |              |                   |                  |
| ≥ 59.8                    | 35              | 34            | 97.14         | 2.718 | 1.605         | 4.601         | 1.976e-04      | 0.58             | 2.546e-01         | 9.062e-01         |              |                   |                  |
| <b>Profile Likelihood</b> |                 |               |               |       |               |               |                |                  |                   |                   |              |                   |                  |
| <60.6                     | 76              | 65            | 85.53         | ----  | ----          | ----          | ----           | 1.25             | 9.774e-01         | 1.703             | 5.32e-05     | 6.94e-06          | 4.38e-02         |
| ≥60.6                     | 30              | 29            | 96.67         | 2.698 | 1.720         | 4.233         | 1.561e-05      | 0.37             | 1.697e-01         | 8.378e-01         |              |                   |                  |
| <b>Quantitative</b>       |                 |               |               |       |               |               |                |                  |                   |                   |              |                   |                  |
|                           | 106             | 94            | 88.68         | 1.033 | 1.015         | 1.052         | 2.952e-04      |                  |                   |                   | 2.518e-04    | 2.916e-04         |                  |



Cohort: Derivation

Outcome: Progression Free Survival by CPI ( Lung Transplant counts as event )

Predictor: Baseline (3-month) FVC % Predicted

|                           | Patients<br>(N) | Events<br>(n) | Events<br>(%) | HR        | HR<br>95% LCL | HR<br>95% UCL | Wald<br>pvalue | Median<br>(yrs.) | Median<br>95% LCL | Median<br>95% UCL | LR<br>pvalue | Logrank<br>pvalue | DevLIN<br>pvalue |
|---------------------------|-----------------|---------------|---------------|-----------|---------------|---------------|----------------|------------------|-------------------|-------------------|--------------|-------------------|------------------|
| <b>Quintiles</b>          |                 |               |               |           |               |               |                |                  |                   |                   |              |                   |                  |
| < 43.1                    | 22              | 21            | 95.45         | ----      | ----          | ----          | ----           | 0.28             | 1.477e-01         | 1.703             | 1.93e-03     | 2.85e-03          | 1.99e-01         |
| [ 43.1,56.5)              | 21              | 19            | 90.48         | 8.032e-01 | 4.288e-01     | 1.505         | 4.937e-01      | 0.62             | 4.081e-01         | 1.284             |              |                   |                  |
| [ 56.5,65.7)              | 22              | 19            | 86.36         | 6.284e-01 | 3.370e-01     | 1.172         | 1.438e-01      | 0.86             | 6.626e-01         | 2.031             |              |                   |                  |
| [ 65.7,76.7)              | 19              | 18            | 94.74         | 6.559e-01 | 3.484e-01     | 1.235         | 1.913e-01      | 1.25             | 5.749e-01         | 1.947             |              |                   |                  |
| ≥ 76.7                    | 22              | 17            | 77.27         | 2.763e-01 | 1.400e-01     | 5.451e-01     | 2.069e-04      | 1.47             | 1.087             |                   |              |                   |                  |
| <b>Quartiles</b>          |                 |               |               |           |               |               |                |                  |                   |                   |              |                   |                  |
| < 47.8                    | 27              | 26            | 96.30         | ----      | ----          | ----          | ----           | 0.33             | 1.697e-01         | 8.598e-01         | 6.52e-04     | 8.55e-04          | 1.15e-01         |
| [ 47.8,60.5)              | 27              | 23            | 85.19         | 6.623e-01 | 3.754e-01     | 1.169         | 1.550e-01      | 0.86             | 4.873e-01         | 1.235             |              |                   |                  |
| [ 60.5,73.4)              | 27              | 25            | 92.59         | 6.962e-01 | 4.006e-01     | 1.210         | 1.989e-01      | 0.86             | 6.626e-01         | 1.596             |              |                   |                  |
| ≥ 73.4                    | 25              | 20            | 80.00         | 2.932e-01 | 1.581e-01     | 5.438e-01     | 9.893e-05      | 1.95             | 1.087             | 4.153             |              |                   |                  |
| <b>Tertiles</b>           |                 |               |               |           |               |               |                |                  |                   |                   |              |                   |                  |
| < 52.4                    | 36              | 34            | 94.44         | ----      | ----          | ----          | ----           | 0.40             | 2.300e-01         | 8.598e-01         | 5.44e-04     | 4.64e-04          | 1.71e-01         |
| [ 52.4,69.6)              | 36              | 31            | 86.11         | 6.709e-01 | 4.111e-01     | 1.095         | 1.102e-01      | 0.86             | 6.626e-01         | 9.856e-01         |              |                   |                  |
| ≥ 69.6                    | 34              | 29            | 85.29         | 3.626e-01 | 2.150e-01     | 6.116e-01     | 1.426e-04      | 1.46             | 1.144             | 2.502             |              |                   |                  |
| <b>Profile Likelihood</b> |                 |               |               |           |               |               |                |                  |                   |                   |              |                   |                  |
| < 76.3                    | 83              | 76            | 91.57         | ----      | ----          | ----          | ----           | 0.71             | 5.010e-01         | 9.336e-01         | 8.06e-05     | 1.95e-04          | 3.08e-02         |
| ≥ 76.3                    | 23              | 18            | 78.26         | 3.609e-01 | 2.070e-01     | 6.291e-01     | 3.246e-04      | 2.07             | 1.087             |                   |              |                   |                  |
| <b>Quantitative</b>       |                 |               |               |           |               |               |                |                  |                   |                   |              |                   |                  |
|                           | 106             | 94            | 88.68         | 9.812e-01 | 9.703e-01     | 9.921e-01     | 7.998e-04      |                  |                   |                   | 6.802e-04    | 7.796e-04         |                  |

Cohort: **Derivation**

Outcome: **Progression Free Survival by CPI ( Lung Transplant counts as event )**

Predictor: **Baseline (3-month) DLco % Predicted**

|                           | Patients<br>(N) | Events<br>(n) | Events<br>(%) | HR        | HR<br>95% LCL | HR<br>95% UCL | Wald<br>pvalue | Median<br>(yrs.) | Median<br>95% LCL | Median<br>95% UCL | LR<br>pvalue | Logrank<br>pvalue | DevLIN<br>pvalue |
|---------------------------|-----------------|---------------|---------------|-----------|---------------|---------------|----------------|------------------|-------------------|-------------------|--------------|-------------------|------------------|
| <b>Quintiles</b>          |                 |               |               |           |               |               |                |                  |                   |                   |              |                   |                  |
| < 28.6                    | 18              | 18            | 100.00        | ----      | ----          | ----          | ----           | 0.41             | 8.761e-02         | 9.500e-01         | 3.33e-03     | 1.65e-03          | 6.30e-01         |
| [ 28.6,38)                | 18              | 15            | 83.33         | 5.712e-01 | 2.831e-01     | 1.152         | 1.179e-01      | 0.40             | 1.834e-01         | 2.932             |              |                   |                  |
| [ 38,49.9)                | 20              | 18            | 90.00         | 4.479e-01 | 2.320e-01     | 8.646e-01     | 1.669e-02      | 0.98             | 7.392e-01         | 2.034             |              |                   |                  |
| [ 49.9,61)                | 18              | 17            | 94.44         | 4.217e-01 | 2.152e-01     | 8.261e-01     | 1.184e-02      | 1.14             | 7.173e-01         | 2.519             |              |                   |                  |
| ≥ 61                      | 20              | 15            | 75.00         | 2.349e-01 | 1.120e-01     | 4.929e-01     | 1.277e-04      | 1.47             | 4.983e-01         |                   |              |                   |                  |
| <b>Quartiles</b>          |                 |               |               |           |               |               |                |                  |                   |                   |              |                   |                  |
| < 31.4                    | 23              | 22            | 95.65         | ----      | ----          | ----          | ----           | 0.67             | 1.697e-01         | 1.446             | 1.92e-03     | 1.92e-03          | 5.13e-01         |
| [ 31.4,41.3)              | 24              | 22            | 91.67         | 1.110     | 6.129e-01     | 2.011         | 7.301e-01      | 0.71             | 3.313e-01         | 9.856e-01         |              |                   |                  |
| [ 41.3,57.2)              | 23              | 21            | 91.30         | 6.015e-01 | 3.299e-01     | 1.097         | 9.716e-02      | 1.23             | 7.173e-01         | 2.034             |              |                   |                  |
| ≥ 57.2                    | 24              | 18            | 75.00         | 3.606e-01 | 1.871e-01     | 6.949e-01     | 2.309e-03      | 1.65             | 8.433e-01         |                   |              |                   |                  |
| <b>Tertiles</b>           |                 |               |               |           |               |               |                |                  |                   |                   |              |                   |                  |
| < 34.5                    | 31              | 29            | 93.55         | ----      | ----          | ----          | ----           | 0.41             | 2.300e-01         | 9.500e-01         | 5.32e-03     | 4.69e-03          | 8.82e-01         |
| [ 34.5,54.3)              | 32              | 29            | 90.62         | 6.774e-01 | 4.039e-01     | 1.136         | 1.398e-01      | 0.98             | 7.091e-01         | 1.703             |              |                   |                  |
| ≥ 54.3                    | 31              | 25            | 80.65         | 4.024e-01 | 2.303e-01     | 7.032e-01     | 1.390e-03      | 1.33             | 7.173e-01         | 2.645             |              |                   |                  |
| <b>Profile Likelihood</b> |                 |               |               |           |               |               |                |                  |                   |                   |              |                   |                  |
| <41.0                     | 46              | 43            | 93.48         | ----      | ----          | ----          | ----           | 0.67             | 3.313e-01         | 9.391e-01         | 2.26e-04     | 1.44e-04          | 2.31e-01         |
| ≥41.0                     | 48              | 40            | 83.33         | 4.294e-01 | 2.744e-01     | 6.721e-01     | 2.167e-04      | 1.33             | 8.624e-01         | 2.070             |              |                   |                  |
| <b>Quantitative</b>       | 94              | 83            | 88.30         | 9.752e-01 | 9.620e-01     | 9.887e-01     | 3.221e-04      |                  |                   |                   | 2.781e-04    | 2.744e-04         |                  |

**Cohort: Derivation**  
**Outcome: Progression Free Survival by CPI ( Lung Transplant counts as event )**  
**Predictor: Baseline (3-month) CPI**

|                           | Patients<br>(N) | Events<br>(n) | Events<br>(%) | HR    | HR<br>95% LCL | HR<br>95% UCL | Wald<br>pvalue | Median<br>(yrs.) | Median<br>95% LCL | Median<br>95% UCL | LR<br>pvalue | Logrank<br>pvalue | DevLIN<br>pvalue |
|---------------------------|-----------------|---------------|---------------|-------|---------------|---------------|----------------|------------------|-------------------|-------------------|--------------|-------------------|------------------|
| <b>Quintiles</b>          |                 |               |               |       |               |               |                |                  |                   |                   |              |                   |                  |
| < 42.8                    | 19              | 14            | 73.68         | ----  | ----          | ----          | ----           | 1.74             | 4.983e-01         |                   | 6.91e-03     | 5.98e-03          | 7.73e-01         |
| [ 42.8,51.5)              | 18              | 17            | 94.44         | 1.495 | 7.234e-01     | 3.089         | 2.777e-01      | 1.12             | 8.433e-01         | 2.645             |              |                   |                  |
| [ 51.5,59)                | 19              | 16            | 84.21         | 1.964 | 9.288e-01     | 4.155         | 7.729e-02      | 1.11             | 6.186e-01         | 1.596             |              |                   |                  |
| [ 59,65.1)                | 19              | 18            | 94.74         | 3.182 | 1.527         | 6.629         | 1.993e-03      | 0.66             | 4.025e-01         | 9.500e-01         |              |                   |                  |
| ≥ 65.1                    | 19              | 18            | 94.74         | 2.988 | 1.444         | 6.184         | 3.174e-03      | 0.33             | 8.761e-02         | 2.127             |              |                   |                  |
| <b>Quartiles</b>          |                 |               |               |       |               |               |                |                  |                   |                   |              |                   |                  |
| < 44.3                    | 23              | 18            | 78.26         | ----  | ----          | ----          | ----           | 1.47             | 8.049e-01         |                   | 1.67e-03     | 1.01e-03          | 4.52e-01         |
| [ 44.3,56.1)              | 24              | 21            | 87.50         | 1.343 | 7.069e-01     | 2.552         | 3.676e-01      | 1.23             | 8.433e-01         | 2.502             |              |                   |                  |
| [ 56.1,62.8)              | 24              | 22            | 91.67         | 2.361 | 1.230         | 4.532         | 9.842e-03      | 0.74             | 6.708e-01         | 1.284             |              |                   |                  |
| ≥ 62.8                    | 23              | 22            | 95.65         | 3.148 | 1.652         | 5.999         | 4.909e-04      | 0.23             | 9.035e-02         | 9.391e-01         |              |                   |                  |
| <b>Tertiles</b>           |                 |               |               |       |               |               |                |                  |                   |                   |              |                   |                  |
| < 47.6                    | 31              | 25            | 80.65         | ----  | ----          | ----          | ----           | 1.47             | 8.433e-01         | 2.491             | 7.14e-04     | 3.36e-04          | 3.56e-01         |
| [ 47.6,59.9)              | 32              | 28            | 87.50         | 1.524 | 8.746e-01     | 2.654         | 1.370e-01      | 0.98             | 7.173e-01         | 1.596             |              |                   |                  |
| ≥ 59.9                    | 31              | 30            | 96.77         | 2.920 | 1.678         | 5.082         | 1.500e-04      | 0.40             | 1.697e-01         | 9.062e-01         |              |                   |                  |
| <b>Profile Likelihood</b> |                 |               |               |       |               |               |                |                  |                   |                   |              |                   |                  |
| <56.2                     | 48              | 40            | 83.33         | ----  | ----          | ----          | ----           | 1.33             | 1.035             | 2.070             | 2.13e-04     | 1.35e-04          | 1.53e-01         |
| ≥56.2                     | 46              | 43            | 93.48         | 2.336 | 1.493         | 3.655         | 2.035e-04      | 0.67             | 3.751e-01         | 9.336e-01         |              |                   |                  |
| <b>Quantitative</b>       | 94              | 83            | 88.30         | 1.033 | 1.014         | 1.052         | 4.478e-04      |                  |                   |                   | 3.912e-04    | 4.238e-04         |                  |

**Cohort: Derivation**  
**Outcome: Progression Free Survival by CPI ( Lung Transplant counts as event )**  
**Predictor: MMP7 ( ng / mL )**

|                           | Patients<br>(N) | Events<br>(n) | Events<br>(%) | HR        | HR<br>95% LCL | HR<br>95% UCL | Wald<br>pvalue | Median<br>(yrs.) | Median<br>95% LCL | Median<br>95% UCL | LR<br>pvalue | Logrank<br>pvalue | DevLIN<br>pvalue |
|---------------------------|-----------------|---------------|---------------|-----------|---------------|---------------|----------------|------------------|-------------------|-------------------|--------------|-------------------|------------------|
| <b>Quintiles</b>          |                 |               |               |           |               |               |                |                  |                   |                   |              |                   |                  |
| < 2.7                     | 26              | 23            | 88.46         | ----      | ----          | ----          | ----           | 1.00             | 4.736e-01         | 1.744             | 7.10e-01     | 7.09e-01          | 6.05e-01         |
| [ 2.7,3.76)               | 23              | 21            | 91.30         | 7.826e-01 | 4.319e-01     | 1.418         | 4.188e-01      | 0.99             | 8.433e-01         | 2.491             |              |                   |                  |
| [ 3.76,4.99)              | 27              | 25            | 92.59         | 1.045     | 5.868e-01     | 1.861         | 8.812e-01      | 0.80             | 4.791e-01         | 1.284             |              |                   |                  |
| [ 4.99,6.41)              | 26              | 24            | 92.31         | 1.147     | 6.467e-01     | 2.035         | 6.389e-01      | 0.53             | 3.313e-01         | 1.947             |              |                   |                  |
| ≥ 6.41                    | 26              | 23            | 88.46         | 8.593e-01 | 4.807e-01     | 1.536         | 6.088e-01      | 0.86             | 6.708e-01         | 2.850             |              |                   |                  |
| <b>Quartiles</b>          |                 |               |               |           |               |               |                |                  |                   |                   |              |                   |                  |
| < 2.92                    | 32              | 29            | 90.62         | ----      | ----          | ----          | ----           | 1.14             | 6.626e-01         | 1.744             | 6.44e-01     | 6.35e-01          | 6.47e-01         |
| [ 2.92,4.3)               | 30              | 27            | 90.00         | 8.768e-01 | 5.147e-01     | 1.494         | 6.287e-01      | 0.86             | 7.173e-01         | 2.078             |              |                   |                  |
| [ 4.3,5.73)               | 33              | 30            | 90.91         | 1.232     | 7.380e-01     | 2.057         | 4.249e-01      | 0.57             | 4.791e-01         | 1.446             |              |                   |                  |
| ≥ 5.73                    | 33              | 30            | 90.91         | 9.817e-01 | 5.881e-01     | 1.639         | 9.437e-01      | 0.90             | 6.708e-01         | 2.127             |              |                   |                  |
| <b>Tertiles</b>           |                 |               |               |           |               |               |                |                  |                   |                   |              |                   |                  |
| < 3.51                    | 43              | 38            | 88.37         | ----      | ----          | ----          | ----           | 1.33             | 7.502e-01         | 2.070             | 3.78e-01     | 3.68e-01          | 3.73e-01         |
| [ 3.51,5.35)              | 42              | 39            | 92.86         | 1.379     | 8.759e-01     | 2.172         | 1.651e-01      | 0.72             | 5.010e-01         | 9.391e-01         |              |                   |                  |
| ≥ 5.35                    | 43              | 39            | 90.70         | 1.122     | 7.168e-01     | 1.755         | 6.154e-01      | 0.95             | 6.708e-01         | 2.031             |              |                   |                  |
| <b>Profile Likelihood</b> |                 |               |               |           |               |               |                |                  |                   |                   |              |                   |                  |
| < 3.9                     | 52              | 46            | 88.46         | ----      | ----          | ----          | ----           | 0.99             | 7.502e-01         | 1.744             | 1.10e-01     | 1.13e-01          | 3.01e-02         |
| ≥ 3.9                     | 76              | 70            | 92.11         | 1.355     | 9.303e-01     | 1.973         | 1.134e-01      | 0.84             | 6.186e-01         | 1.035             |              |                   |                  |
| <b>Quantitative</b>       |                 |               |               |           |               |               |                |                  |                   |                   |              |                   |                  |
|                           | 128             | 116           | 90.62         | 1.004     | 0.9425        | 1.070         | 9.007e-01      |                  |                   |                   | 9.009e-01    | 9.007e-01         |                  |

**Cohort: Derivation**  
**Outcome: Progression Free Survival by CPI ( Lung Transplant counts as event )**  
**Predictor: ICAM1 ( ng / mL )**

|                           | Patients<br>(N) | Events<br>(n) | Events<br>(%) | HR        | HR<br>95% LCL | HR<br>95% UCL | Wald<br>pvalue | Median<br>(yrs.) | Median<br>95% LCL | Median<br>95% UCL | LR<br>pvalue | Logrank<br>pvalue | DevLIN<br>pvalue |
|---------------------------|-----------------|---------------|---------------|-----------|---------------|---------------|----------------|------------------|-------------------|-------------------|--------------|-------------------|------------------|
| <b>Quintiles</b>          |                 |               |               |           |               |               |                |                  |                   |                   | 3.88e-01     | 3.57e-01          | 2.17e-01         |
| < 158                     | 27              | 24            | 88.89         | ----      | ----          | ----          | ----           | 1.11             | 5.010e-01         | 2.070             |              |                   |                  |
| [ 158,205)                | 26              | 22            | 84.62         | 1.030     | 5.759e-01     | 1.840         | 9.218e-01      | 0.86             | 7.091e-01         | 2.127             |              |                   |                  |
| [ 205,252)                | 27              | 24            | 88.89         | 1.118     | 6.337e-01     | 1.971         | 7.009e-01      | 0.75             | 4.079e-01         | 2.502             |              |                   |                  |
| [ 252,351)                | 27              | 26            | 96.30         | 1.514     | 8.666e-01     | 2.645         | 1.451e-01      | 0.77             | 4.408e-01         | 1.333             |              |                   |                  |
| ≥ 351                     | 28              | 26            | 92.86         | 8.580e-01 | 4.854e-01     | 1.517         | 5.983e-01      | 0.93             | 8.241e-01         | 2.352             |              |                   |                  |
| <b>Quartiles</b>          |                 |               |               |           |               |               |                |                  |                   |                   | 5.49e-01     | 5.43e-01          | 3.48e-01         |
| < 175                     | 32              | 28            | 87.50         | ----      | ----          | ----          | ----           | 1.05             | 7.091e-01         | 2.070             |              |                   |                  |
| [ 175,230)                | 35              | 32            | 91.43         | 1.389     | 8.347e-01     | 2.312         | 2.059e-01      | 0.79             | 6.186e-01         | 1.235             |              |                   |                  |
| [ 230,318)                | 33              | 29            | 87.88         | 1.169     | 6.949e-01     | 1.966         | 5.566e-01      | 0.91             | 4.079e-01         | 2.031             |              |                   |                  |
| ≥ 318                     | 35              | 33            | 94.29         | 1.012     | 6.063e-01     | 1.690         | 9.632e-01      | 0.93             | 6.626e-01         | 1.947             |              |                   |                  |
| <b>Tertiles</b>           |                 |               |               |           |               |               |                |                  |                   |                   | 5.31e-01     | 5.25e-01          | 5.29e-01         |
| < 197                     | 46              | 40            | 86.96         | ----      | ----          | ----          | ----           | 0.92             | 8.049e-01         | 1.703             |              |                   |                  |
| [ 197,274)                | 43              | 39            | 90.70         | 1.286     | 8.268e-01     | 2.000         | 2.643e-01      | 0.75             | 5.749e-01         | 1.333             |              |                   |                  |
| ≥ 274                     | 46              | 43            | 93.48         | 1.089     | 7.038e-01     | 1.684         | 7.028e-01      | 0.91             | 6.407e-01         | 1.673             |              |                   |                  |
| <b>Profile Likelihood</b> |                 |               |               |           |               |               |                |                  |                   |                   | 2.08e-01     | 2.20e-01          | 2.08e-02         |
| <351.5                    | 107             | 96            | 89.72         | ----      | ----          | ----          | ----           | 0.86             | 7.010e-01         | 1.112             |              |                   |                  |
| ≥351.5                    | 28              | 26            | 92.86         | 7.543e-01 | 4.806e-01     | 1.184         | 2.202e-01      | 0.93             | 8.241e-01         | 2.352             |              |                   |                  |
| <b>Quantitative</b>       | 135             | 122           | 90.37         | 1.000     | 9.987e-01     | 1.001         | 9.319e-01      |                  |                   |                   | 9.320e-01    | 9.319e-01         |                  |

Cohort: **Derivation**

Outcome: **Progression Free Survival by CPI ( Lung Transplant counts as event )**

Predictor: **IL8 ( ng / mL )**

|                           | Patients<br>(N) | Events<br>(n) | Events<br>(%) | HR        | HR<br>95% LCL | HR<br>95% UCL | Wald<br>pvalue | Median<br>(yrs.) | Median<br>95% LCL | Median<br>95% UCL | LR<br>pvalue | Logrank<br>pvalue | DevLIN<br>pvalue |
|---------------------------|-----------------|---------------|---------------|-----------|---------------|---------------|----------------|------------------|-------------------|-------------------|--------------|-------------------|------------------|
| <b>Quintiles</b>          |                 |               |               |           |               |               |                |                  |                   |                   |              |                   |                  |
| < 0.0051                  | 25              | 22            | 88.00         | ----      | ----          | ----          | ----           | 1.11             | 4.983e-01         | 1.744             | 3.30e-02     | 2.54e-02          | 1.42e-01         |
| [ 0.0051,0.00776)         | 27              | 21            | 77.78         | 1.732     | 9.765e-01     | 3.072         | 6.031e-02      | 1.28             | 9.500e-01         |                   |              |                   |                  |
| [ 0.00776,0.00968)        | 28              | 27            | 96.43         | 6.726e-01 | 3.661e-01     | 1.236         | 2.013e-01      | 0.84             | 4.081e-01         | 2.519             |              |                   |                  |
| [ 0.00968,0.013)          | 27              | 26            | 96.30         | 9.393e-01 | 5.332e-01     | 1.655         | 8.284e-01      | 0.86             | 6.708e-01         | 1.703             |              |                   |                  |
| ≥ 0.013                   | 28              | 26            | 92.86         | 1.163     | 6.576e-01     | 2.058         | 6.031e-01      | 0.53             | 1.477e-01         | 1.087             |              |                   |                  |
| <b>Quartiles</b>          |                 |               |               |           |               |               |                |                  |                   |                   |              |                   |                  |
| < 0.0056                  | 32              | 28            | 87.50         | ----      | ----          | ----          | ----           | 1.11             | 4.983e-01         | 1.648             | 4.35e-04     | 5.99e-04          | 2.31e-03         |
| [ 0.0056,0.0087)          | 31              | 25            | 80.65         | 1.602     | 9.823e-01     | 2.613         | 5.898e-02      | 2.03             | 9.856e-01         | 4.085             |              |                   |                  |
| [ 0.0087,0.011)           | 29              | 29            | 100.00        | 5.395e-01 | 3.092e-01     | 9.413e-01     | 2.979e-02      | 0.79             | 5.830e-01         | 1.714             |              |                   |                  |
| ≥ 0.011                   | 43              | 40            | 93.02         | 1.196     | 7.087e-01     | 2.017         | 5.030e-01      | 0.67             | 3.450e-01         | 9.391e-01         |              |                   |                  |
| <b>Tertiles</b>           |                 |               |               |           |               |               |                |                  |                   |                   |              |                   |                  |
| < 0.0066                  | 41              | 35            | 85.37         | ----      | ----          | ----          | ----           | 1.28             | 4.983e-01         | 1.744             | 1.58e-02     | 1.19e-02          | 7.83e-02         |
| [ 0.0066,0.00997)         | 48              | 44            | 91.67         | 8.798e-01 | 5.601e-01     | 1.382         | 5.784e-01      | 0.86             | 7.940e-01         | 2.341             |              |                   |                  |
| ≥ 0.00997                 | 46              | 43            | 93.48         | 1.649     | 1.049         | 2.592         | 3.019e-02      | 0.84             | 3.587e-01         | 9.774e-01         |              |                   |                  |
| <b>Profile Likelihood</b> |                 |               |               |           |               |               |                |                  |                   |                   |              |                   |                  |
| < 0.0084                  | 60              | 50            | 83.33         | ----      | ----          | ----          | ----           | 1.28             | 9.062e-01         | 2.034             | 5.17e-04     | 5.39e-04          | 3.38e-03         |
| ≥ 0.0084                  | 75              | 72            | 96.00         | 1.927     | 1.323         | 2.809         | 6.360e-04      | 0.79             | 5.830e-01         | 8.624e-01         |              |                   |                  |
| <b>Quantitative*</b>      | 135             | 122           | 90.37         | 1.020     | 1.003         | 1.037         | 2.401e-02      |                  |                   |                   | 5.725e-02    | 2.248e-02         |                  |

\*Units of pg / mL were used in **Quantitative model only**.

Cohort: Derivation

Outcome: Progression Free Survival by CPI ( Lung Transplant counts as event )

Predictor: VCAM1 ( ng / mL )

|                           | Patients<br>(N) | Events<br>(n) | Events<br>(%) | HR        | HR<br>95% LCL | HR<br>95% UCL | Wald<br>pvalue | Median<br>(yrs.) | Median<br>95% LCL | Median<br>95% UCL | LR<br>pvalue | Logrank<br>pvalue | DevLIN<br>pvalue |
|---------------------------|-----------------|---------------|---------------|-----------|---------------|---------------|----------------|------------------|-------------------|-------------------|--------------|-------------------|------------------|
| <b>Quintiles</b>          |                 |               |               |           |               |               |                |                  |                   |                   |              |                   |                  |
| < 335                     | 26              | 23            | 88.46         | ----      | ----          | ----          | ----           | 0.99             | 6.186e-01         | 1.744             | 1.45e-01     | 1.65e-01          | 1.37e-01         |
| [ 335,402)                | 27              | 25            | 92.59         | 6.208e-01 | 3.481e-01     | 1.107         | 1.062e-01      | 2.03             | 9.062e-01         | 2.664             |              |                   |                  |
| [ 402,457)                | 29              | 25            | 86.21         | 1.104     | 6.232e-01     | 1.957         | 7.335e-01      | 0.67             | 4.791e-01         | 1.035             |              |                   |                  |
| [ 457,572)                | 28              | 26            | 92.86         | 1.212     | 6.875e-01     | 2.136         | 5.063e-01      | 0.48             | 3.450e-01         | 1.596             |              |                   |                  |
| ≥ 572                     | 25              | 23            | 92.00         | 9.592e-01 | 5.348e-01     | 1.720         | 8.888e-01      | 0.95             | 8.350e-01         | 2.127             |              |                   |                  |
| <b>Quartiles</b>          |                 |               |               |           |               |               |                |                  |                   |                   |              |                   |                  |
| < 359                     | 34              | 31            | 91.18         | ----      | ----          | ----          | ----           | 1.14             | 7.392e-01         | 1.744             | 9.14e-02     | 9.96e-02          | 1.48e-01         |
| [ 359,419)                | 32              | 28            | 87.50         | 6.799e-01 | 4.030e-01     | 1.147         | 1.481e-01      | 1.03             | 8.049e-01         | 2.645             |              |                   |                  |
| [ 419,518)                | 37              | 34            | 91.89         | 1.271     | 7.776e-01     | 2.076         | 3.390e-01      | 0.49             | 4.079e-01         | 1.087             |              |                   |                  |
| ≥ 518                     | 32              | 29            | 90.62         | 1.109     | 6.661e-01     | 1.846         | 6.912e-01      | 0.86             | 5.284e-01         | 1.947             |              |                   |                  |
| <b>Tertiles</b>           |                 |               |               |           |               |               |                |                  |                   |                   |              |                   |                  |
| < 378                     | 46              | 41            | 89.13         | ----      | ----          | ----          | ----           | 1.14             | 8.049e-01         | 1.703             | 9.12e-01     | 9.14e-01          | 6.55e-01         |
| [ 378,480)                | 45              | 41            | 91.11         | 1.055     | 6.790e-01     | 1.639         | 8.118e-01      | 0.70             | 4.791e-01         | 1.112             |              |                   |                  |
| ≥ 480                     | 44              | 40            | 90.91         | 1.100     | 7.100e-01     | 1.705         | 6.691e-01      | 0.93             | 6.708e-01         | 1.714             |              |                   |                  |
| <b>Profile Likelihood</b> |                 |               |               |           |               |               |                |                  |                   |                   |              |                   |                  |
| < 418.0                   | 66              | 59            | 89.39         | ----      | ----          | ----          | ----           | 1.14             | 8.433e-01         | 1.744             | 4.40e-02     | 4.31e-02          | 1.15e-01         |
| ≥ 418.0                   | 69              | 63            | 91.30         | 1.448     | 1.010         | 2.078         | 4.410e-02      | 0.75             | 4.791e-01         | 9.500e-01         |              |                   |                  |
| <b>Quantitative</b>       | 135             | 122           | 90.37         | 1.001     | 9.997e-01     | 1.002         | 1.872e-01      |                  |                   |                   | 2.038e-01    | 1.871e-01         |                  |

**Cohort: Derivation**  
**Outcome: Progression Free Survival by CPI ( Lung Transplant counts as event )**  
**Predictor: S100A12 ( ng / mL )**

|                           | Patients<br>(N) | Events<br>(n) | Events<br>(%) | HR        | HR<br>95% LCL | HR<br>95% UCL | Wald<br>pvalue | Median<br>(yrs.) | Median<br>95% LCL | Median<br>95% UCL | LR<br>pvalue | Logrank<br>pvalue | DevLIN<br>pvalue |
|---------------------------|-----------------|---------------|---------------|-----------|---------------|---------------|----------------|------------------|-------------------|-------------------|--------------|-------------------|------------------|
| <b>Quintiles</b>          |                 |               |               |           |               |               |                |                  |                   |                   |              |                   |                  |
| < 15                      | 26              | 23            | 88.46         | ----      | ----          | ----          | ----           | 1.37             | 8.049e-01         | 2.519             | 1.27e-02     | 4.51e-03          | 1.55e-02         |
| [ 15,21.6)                | 29              | 23            | 79.31         | 1.217     | 6.795e-01     | 2.181         | 5.087e-01      | 0.95             | 7.010e-01         | 2.300             |              |                   |                  |
| [ 21.6,29)                | 26              | 24            | 92.31         | 1.100     | 6.188e-01     | 1.956         | 7.454e-01      | 1.28             | 7.091e-01         | 2.431             |              |                   |                  |
| [ 29,51)                  | 26              | 26            | 100.00        | 2.688     | 1.503         | 4.809         | 8.607e-04      | 0.63             | 4.079e-01         | 8.624e-01         |              |                   |                  |
| ≥ 51                      | 28              | 26            | 92.86         | 1.351     | 7.649e-01     | 2.385         | 3.001e-01      | 0.94             | 3.313e-01         | 2.127             |              |                   |                  |
| <b>Quartiles</b>          |                 |               |               |           |               |               |                |                  |                   |                   |              |                   |                  |
| < 17.8                    | 34              | 31            | 91.18         | ----      | ----          | ----          | ----           | 0.95             | 8.433e-01         | 2.070             | 5.14e-02     | 4.40e-02          | 6.30e-02         |
| [ 17.8,25)                | 34              | 26            | 76.47         | 8.777e-01 | 5.204e-01     | 1.480         | 6.249e-01      | 1.33             | 7.010e-01         | 2.300             |              |                   |                  |
| [ 25,45.2)                | 34              | 34            | 100.00        | 1.714     | 1.047         | 2.804         | 3.203e-02      | 0.69             | 4.983e-01         | 9.062e-01         |              |                   |                  |
| ≥ 45.2                    | 33              | 31            | 93.94         | 1.303     | 7.877e-01     | 2.157         | 3.024e-01      | 0.90             | 3.614e-01         | 1.473             |              |                   |                  |
| <b>Tertiles</b>           |                 |               |               |           |               |               |                |                  |                   |                   |              |                   |                  |
| < 19                      | 39              | 35            | 89.74         | ----      | ----          | ----          | ----           | 0.95             | 8.350e-01         | 2.070             | 1.42e-01     | 1.28e-01          | 1.20e-01         |
| [ 19,37)                  | 51              | 44            | 86.27         | 9.953e-01 | 6.375e-01     | 1.554         | 9.834e-01      | 0.99             | 7.010e-01         | 1.744             |              |                   |                  |
| ≥ 37                      | 45              | 43            | 95.56         | 1.471     | 9.371e-01     | 2.309         | 9.342e-02      | 0.79             | 4.983e-01         | 9.391e-01         |              |                   |                  |
| <b>Profile Likelihood</b> |                 |               |               |           |               |               |                |                  |                   |                   |              |                   |                  |
| < 25.5                    | 71              | 60            | 84.51         | ----      | ----          | ----          | ----           | 1.14             | 8.624e-01         | 1.947             | 3.79e-03     | 3.28e-03          | 2.21e-03         |
| ≥ 25.5                    | 64              | 62            | 96.88         | 1.707     | 1.190         | 2.448         | 3.637e-03      | 0.71             | 4.983e-01         | 9.062e-01         |              |                   |                  |
| <b>Quantitative</b>       |                 |               |               |           |               |               |                |                  |                   |                   |              |                   |                  |
|                           | 135             | 122           | 90.37         | 1.001     | 9.976e-01     | 1.005         | 4.744e-01      |                  |                   |                   | 4.916e-01    | 4.738e-01         |                  |



**Cohort: Validation**  
**Outcome: Mortality**  
**Predictor: Age (years)**

|                           | Patients<br>(N) | Events<br>(n) | Events<br>(%) | HR    | HR<br>95% LCL | HR<br>95% UCL | Wald<br>pvalue | Median<br>(yrs.) | Median<br>95% LCL | Median<br>95% UCL | LR<br>pvalue | Logrank<br>pvalue | DevLIN<br>pvalue |
|---------------------------|-----------------|---------------|---------------|-------|---------------|---------------|----------------|------------------|-------------------|-------------------|--------------|-------------------|------------------|
| <b>Quintiles</b>          |                 |               |               |       |               |               |                |                  |                   |                   |              |                   |                  |
| < 61.6                    | 20              | 3             | 15.00         | ----  | ----          | ----          | ----           | 0.00             | 4.087             |                   | 1.04e-03     | 2.02e-03          | 3.34e-02         |
| [ 61.6,66.5)              | 20              | 9             | 45.00         | 7.026 | 1.863         | 2.649e+01     | 3.991e-03      | 1.18             | 5.940e-01         |                   |              |                   |                  |
| [ 66.5,70.1)              | 20              | 8             | 40.00         | 4.109 | 1.079         | 1.565e+01     | 3.832e-02      | 2.05             | 1.008             |                   |              |                   |                  |
| [ 70.1,77.1)              | 20              | 9             | 45.00         | 4.411 | 1.171         | 1.662e+01     | 2.830e-02      | 2.34             | 1.322             |                   |              |                   |                  |
| ≥ 77.1                    | 21              | 14            | 66.67         | 9.615 | 2.677         | 3.454e+01     | 5.217e-04      | 1.55             | 9.363e-01         |                   |              |                   |                  |
| <b>Quartiles</b>          |                 |               |               |       |               |               |                |                  |                   |                   |              |                   |                  |
| < 62.8                    | 25              | 5             | 20.00         | ----  | ----          | ----          | ----           | 0.00             | 4.087             |                   | 1.83e-02     | 3.37e-02          | 1.45e-01         |
| [ 62.8,68.4)              | 25              | 11            | 44.00         | 3.980 | 1.355         | 1.168e+01     | 1.196e-02      | 2.05             | 1.008             |                   |              |                   |                  |
| [ 68.4,75)                | 25              | 11            | 44.00         | 2.911 | 1.001         | 8.468         | 4.977e-02      | 2.34             | 1.128             |                   |              |                   |                  |
| ≥ 75                      | 26              | 16            | 61.54         | 3.915 | 1.415         | 1.084e+01     | 8.596e-03      | 1.91             | 1.511             |                   |              |                   |                  |
| <b>Tertiles</b>           |                 |               |               |       |               |               |                |                  |                   |                   |              |                   |                  |
| < 65.3                    | 34              | 9             | 26.47         | ----  | ----          | ----          | ----           | 4.09             | 2.199             |                   | 4.84e-02     | 6.07e-02          | 2.93e-01         |
| [ 65.3,72.8)              | 33              | 15            | 45.45         | 2.192 | 9.517e-01     | 5.047         | 6.523e-02      | 2.05             | 1.008             |                   |              |                   |                  |
| ≥ 72.8                    | 34              | 19            | 55.88         | 2.511 | 1.123         | 5.614         | 2.491e-02      | 1.91             | 1.511             |                   |              |                   |                  |
| <b>Profile Likelihood</b> |                 |               |               |       |               |               |                |                  |                   |                   |              |                   |                  |
| <61.8                     | 21              | 4             | 19.05         | ----  | ----          | ----          | ----           | 0.00             | 4.087             |                   | 1.14e-03     | 3.29e-03          | 1.20e-01         |
| ≥61.8                     | 80              | 39            | 48.75         | 4.255 | 1.498         | 1.209e+01     | 6.543e-03      | 1.93             | 1.322             | 2.888             |              |                   |                  |
| <b>Quantitative</b>       |                 |               |               |       |               |               |                |                  |                   |                   |              |                   |                  |
|                           | 101             | 43            | 42.57         | 1.058 | 1.018         | 1.099         | 4.336e-03      |                  |                   |                   | 2.647e-03    | 3.977e-03         |                  |
| <b>Predictor: Gender</b>  |                 |               |               |       |               |               |                |                  |                   |                   |              |                   |                  |
| Female                    | 36              | 12            | 33.33         | ----  | ----          | ----          | ----           | 3.56             | 2.340             |                   |              |                   |                  |
| Male                      | 65              | 31            | 47.69         | 1.83  | 0.931         | 3.583         | 7.98E-02       | 1.93             | 1.320             |                   | 6.90E-02     | 7.56E-02          |                  |

**Cohort: Validation**  
**Outcome: Mortality**  
**Predictor: Baseline (4-month) FVC % Predicted**

|                           | Patients<br>(N) | Events<br>(n) | Events<br>(%) | HR        | HR<br>95% LCL | HR<br>95% UCL | Wald<br>pvalue | Median<br>(yrs.) | Median<br>95% LCL | Median<br>95% UCL | LR<br>pvalue | Logrank<br>pvalue | DevLIN<br>pvalue |
|---------------------------|-----------------|---------------|---------------|-----------|---------------|---------------|----------------|------------------|-------------------|-------------------|--------------|-------------------|------------------|
| <b>Quintiles</b>          |                 |               |               |           |               |               |                |                  |                   |                   |              |                   |                  |
| < 48.7                    | 18              | 12            | 66.67         | ----      | ----          | ----          | ----           | 1.01             | 7.939e-01         |                   | 3.05e-02     | 3.77e-02          | 8.99e-01         |
| [ 48.7,54.9)              | 17              | 8             | 47.06         | 6.806e-01 | 2.767e-01     | 1.674         | 4.020e-01      | 2.37             | 1.128             |                   |              |                   |                  |
| [ 54.9,62)                | 17              | 8             | 47.06         | 7.761e-01 | 3.068e-01     | 1.964         | 5.925e-01      | 1.55             | 9.363e-01         |                   |              |                   |                  |
| [ 62,77.2)                | 18              | 5             | 27.78         | 3.318e-01 | 1.117e-01     | 9.851e-01     | 4.692e-02      | 0.00             | 1.914             |                   |              |                   |                  |
| ≥ 77.2                    | 18              | 4             | 22.22         | 2.091e-01 | 6.571e-02     | 6.656e-01     | 8.069e-03      | 5.13             | 2.404             |                   |              |                   |                  |
| <b>Quartiles</b>          |                 |               |               |           |               |               |                |                  |                   |                   |              |                   |                  |
| < 49.7                    | 22              | 14            | 63.64         | ----      | ----          | ----          | ----           | 1.18             | 7.939e-01         |                   | 6.63e-02     | 6.70e-02          | 9.41e-01         |
| [ 49.7,58.2)              | 22              | 10            | 45.45         | 6.936e-01 | 3.027e-01     | 1.589         | 3.871e-01      | 2.37             | 9.363e-01         |                   |              |                   |                  |
| [ 58.2,72.6)              | 22              | 7             | 31.82         | 4.772e-01 | 1.864e-01     | 1.222         | 1.230e-01      | 1.93             | 1.552             |                   |              |                   |                  |
| ≥ 72.6                    | 22              | 6             | 27.27         | 2.946e-01 | 1.111e-01     | 7.810e-01     | 1.401e-02      | 5.13             | 2.199             |                   |              |                   |                  |
| <b>Tertiles</b>           |                 |               |               |           |               |               |                |                  |                   |                   |              |                   |                  |
| < 51.8                    | 29              | 16            | 55.17         | ----      | ----          | ----          | ----           | 1.18             | 9.884e-01         |                   | 4.70e-03     | 8.38e-03          | 3.96e-01         |
| [ 51.8,67.6)              | 30              | 14            | 46.67         | 9.203e-01 | 4.373e-01     | 1.937         | 8.268e-01      | 1.55             | 9.363e-01         |                   |              |                   |                  |
| ≥ 67.6                    | 29              | 7             | 24.14         | 2.613e-01 | 1.006e-01     | 6.787e-01     | 5.852e-03      | 5.13             | 2.404             |                   |              |                   |                  |
| <b>Profile Likelihood</b> |                 |               |               |           |               |               |                |                  |                   |                   |              |                   |                  |
| < 69.0                    | 60              | 31            | 51.67         | ----      | ----          | ----          | ----           | 1.55             | 1.008             | 3.565             | 2.89e-04     | 7.26e-04          | 6.27e-02         |
| ≥ 69.0                    | 28              | 6             | 21.43         | 2.223e-01 | 8.583e-02     | 5.760e-01     | 1.962e-03      | 5.13             | 2.404             |                   |              |                   |                  |
| <b>Quantitative</b>       |                 |               |               |           |               |               |                |                  |                   |                   |              |                   |                  |
|                           | 88              | 37            | 42.05         | 9.698e-01 | 9.508e-01     | 9.893e-01     | 2.489e-03      |                  |                   |                   | 1.699e-03    | 2.168e-03         |                  |

**Cohort: Validation**  
**Outcome: Mortality**  
**Predictor: Baseline (4-month) DLco % Predicted**

|                           | Patients<br>(N) | Events<br>(n) | Events<br>(%) | HR        | HR<br>95% LCL | HR<br>95% UCL | Wald<br>pvalue | Median<br>(yrs.) | Median<br>95% LCL | Median<br>95% UCL | LR<br>pvalue | Logrank<br>pvalue | DevLIN<br>pvalue |
|---------------------------|-----------------|---------------|---------------|-----------|---------------|---------------|----------------|------------------|-------------------|-------------------|--------------|-------------------|------------------|
| <b>Quintiles</b>          |                 |               |               |           |               |               |                |                  |                   |                   |              |                   |                  |
| < 30.1                    | 17              | 9             | 52.94         | ----      | ----          | ----          | ----           | 0.99             | 4.353e-01         |                   | 1.78e-02     | 3.37e-03          | 3.87e-01         |
| [ 30.1,38.8)              | 16              | 7             | 43.75         | 3.987e-01 | 1.468e-01     | 1.083         | 7.129e-02      | 2.37             | 1.008             |                   |              |                   |                  |
| [ 38.8,46)                | 16              | 7             | 43.75         | 2.457e-01 | 8.629e-02     | 6.993e-01     | 8.539e-03      | 1.93             | 1.563             |                   |              |                   |                  |
| [ 46,62.2)                | 17              | 6             | 35.29         | 2.070e-01 | 7.142e-02     | 5.998e-01     | 3.713e-03      | 2.89             | 2.404             |                   |              |                   |                  |
| ≥ 62.2                    | 17              | 4             | 23.53         | 1.596e-01 | 4.715e-02     | 5.406e-01     | 3.194e-03      | 5.13             | 1.552             |                   |              |                   |                  |
| <b>Quartiles</b>          |                 |               |               |           |               |               |                |                  |                   |                   |              |                   |                  |
| < 31.7                    | 21              | 10            | 47.62         | ----      | ----          | ----          | ----           | 1.13             | 5.940e-01         |                   | 9.50e-03     | 7.92e-03          | 4.13e-01         |
| [ 31.7,43.7)              | 20              | 10            | 50.00         | 9.239e-01 | 3.840e-01     | 2.223         | 8.597e-01      | 1.19             | 9.363e-01         |                   |              |                   |                  |
| [ 43.7,56.5)              | 21              | 8             | 38.10         | 3.139e-01 | 1.188e-01     | 8.294e-01     | 1.942e-02      | 2.89             | 2.199             |                   |              |                   |                  |
| ≥ 56.5                    | 21              | 5             | 23.81         | 2.252e-01 | 7.201e-02     | 7.041e-01     | 1.038e-02      | 4.30             | 4.301             |                   |              |                   |                  |
| <b>Tertiles</b>           |                 |               |               |           |               |               |                |                  |                   |                   |              |                   |                  |
| < 34.6                    | 28              | 13            | 46.43         | ----      | ----          | ----          | ----           | 1.13             | 8.350e-01         |                   | 1.24e-02     | 1.24e-02          | 9.50e-01         |
| [ 34.6,47.8)              | 27              | 14            | 51.85         | 5.602e-01 | 2.568e-01     | 1.222         | 1.453e-01      | 2.20             | 1.563             |                   |              |                   |                  |
| ≥ 47.8                    | 28              | 6             | 21.43         | 2.402e-01 | 8.855e-02     | 6.518e-01     | 5.102e-03      | 4.30             | 2.404             |                   |              |                   |                  |
| <b>Profile Likelihood</b> |                 |               |               |           |               |               |                |                  |                   |                   |              |                   |                  |
| < 43.2                    | 41              | 20            | 48.78         | ----      | ----          | ----          | ----           | 1.18             | 9.363e-01         |                   | 8.70e-04     | 6.59e-04          | 2.44e-01         |
| ≥ 43.2                    | 42              | 13            | 30.95         | 2.861e-01 | 1.331e-01     | 6.151e-01     | 1.355e-03      | 4.09             | 2.404             |                   |              |                   |                  |
| <b>Quantitative</b>       | 83              | 33            | 39.76         | 9.615e-01 | 9.380e-01     | 9.856e-01     | 1.858e-03      |                  |                   |                   | 5.392e-04    | 1.609e-03         |                  |

**Cohort: Validation**  
**Outcome: Mortality**  
**Predictor: Baseline (4-month) CPI**

|                           | Patients<br>(N) | Events<br>(n) | Events<br>(%) | HR    | HR<br>95% LCL | HR<br>95% UCL | Wald<br>pvalue | Median<br>(yrs.) | Median<br>95% LCL | Median<br>95% UCL | LR<br>pvalue | Logrank<br>pvalue | DevLIN<br>pvalue |
|---------------------------|-----------------|---------------|---------------|-------|---------------|---------------|----------------|------------------|-------------------|-------------------|--------------|-------------------|------------------|
| <b>Quintiles</b>          |                 |               |               |       |               |               |                |                  |                   |                   |              |                   |                  |
| < 41.2                    | 17              | 3             | 17.65         | ----  | ----          | ----          | ----           | 5.13             |                   |                   | 2.77e-02     | 1.74e-02          | 6.27e-01         |
| [ 41.2,50.9)              | 16              | 6             | 37.50         | 2.186 | 5.374e-01     | 8.893         | 2.746e-01      | 2.40             | 1.914             |                   |              |                   |                  |
| [ 50.9,59.1)              | 17              | 7             | 41.18         | 2.361 | 6.079e-01     | 9.167         | 2.146e-01      | 4.09             | 1.185             |                   |              |                   |                  |
| [ 59.1,65.3)              | 16              | 8             | 50.00         | 3.883 | 9.927e-01     | 1.519e+01     | 5.123e-02      | 2.37             | 9.363e-01         |                   |              |                   |                  |
| ≥ 65.3                    | 17              | 9             | 52.94         | 7.022 | 1.838         | 2.682e+01     | 4.364e-03      | 1.01             | 4.353e-01         |                   |              |                   |                  |
| <b>Quartiles</b>          |                 |               |               |       |               |               |                |                  |                   |                   |              |                   |                  |
| < 44.4                    | 21              | 3             | 14.29         | ----  | ----          | ----          | ----           | 5.13             |                   |                   | 2.52e-03     | 2.67e-03          | 8.09e-01         |
| [ 44.4,55.5)              | 20              | 8             | 40.00         | 2.113 | 5.527e-01     | 8.075         | 2.743e-01      | 4.09             | 1.914             |                   |              |                   |                  |
| [ 55.5,64.1)              | 21              | 10            | 47.62         | 5.151 | 1.367         | 1.940e+01     | 1.542e-02      | 1.93             | 1.185             |                   |              |                   |                  |
| ≥ 64.1                    | 21              | 12            | 57.14         | 7.368 | 1.992         | 2.725e+01     | 2.761e-03      | 1.01             | 4.353e-01         |                   |              |                   |                  |
| <b>Tertiles</b>           |                 |               |               |       |               |               |                |                  |                   |                   |              |                   |                  |
| < 49.9                    | 28              | 7             | 25.00         | ----  | ----          | ----          | ----           | 4.30             | 2.199             |                   | 2.43e-02     | 2.05e-02          | 2.96e-01         |
| [ 49.9,60.6)              | 27              | 12            | 44.44         | 1.809 | 7.092e-01     | 4.614         | 2.147e-01      | 2.37             | 1.914             |                   |              |                   |                  |
| ≥ 60.6                    | 28              | 14            | 50.00         | 3.510 | 1.369         | 8.999         | 8.943e-03      | 1.13             | 9.363e-01         |                   |              |                   |                  |
| <b>Profile Likelihood</b> |                 |               |               |       |               |               |                |                  |                   |                   |              |                   |                  |
| <56.0                     | 42              | 11            | 26.19         | ----  | ----          | ----          | ----           | 4.09             | 2.404             |                   | 1.86e-04     | 1.66e-04          | 1.79e-01         |
| ≥56.0                     | 41              | 22            | 53.66         | 4.216 | 1.870         | 9.506         | 5.227e-04      | 1.18             | 9.884e-01         | 3.565             |              |                   |                  |
| <b>Quantitative</b>       | 83              | 33            | 39.76         | 1.059 | 1.024         | 1.095         | 8.834e-04      |                  |                   |                   | 1.994e-04    | 6.643e-04         |                  |

**Cohort: Validation**  
**Outcome: Mortality**  
**Predictor: Baseline (3-month) FVC % Predicted**

|                           | Patients<br>(N) | Events<br>(n) | Events<br>(%) | HR        | HR<br>95% LCL | HR<br>95% UCL | Wald<br>pvalue | Median<br>(yrs.) | Median<br>95% LCL | Median<br>95% UCL | LR<br>pvalue | Logrank<br>pvalue | DevLIN<br>pvalue |
|---------------------------|-----------------|---------------|---------------|-----------|---------------|---------------|----------------|------------------|-------------------|-------------------|--------------|-------------------|------------------|
| <b>Quintiles</b>          |                 |               |               |           |               |               |                |                  |                   |                   |              |                   |                  |
| < 48.9                    | 15              | 9             | 60.00         | ----      | ----          | ----          | ----           | 1.01             | 5.940e-01         |                   | 1.02e-02     | 9.02e-03          | 4.82e-01         |
| [ 48.9,55.7)              | 15              | 5             | 33.33         | 4.843e-01 | 1.612e-01     | 1.455         | 1.964e-01      | 4.09             | 1.128             |                   |              |                   |                  |
| [ 55.7,62)                | 13              | 8             | 61.54         | 9.650e-01 | 3.590e-01     | 2.594         | 9.438e-01      | 1.19             | 8.543e-01         |                   |              |                   |                  |
| [ 62,76.7)                | 17              | 4             | 23.53         | 2.454e-01 | 7.150e-02     | 8.423e-01     | 2.557e-02      | 0.00             | 1.914             |                   |              |                   |                  |
| ≥ 76.7                    | 15              | 3             | 20.00         | 1.611e-01 | 4.188e-02     | 6.194e-01     | 7.886e-03      | 5.13             | 2.404             |                   |              |                   |                  |
| <b>Quartiles</b>          |                 |               |               |           |               |               |                |                  |                   |                   |              |                   |                  |
| < 49.7                    | 19              | 10            | 52.63         | ----      | ----          | ----          | ----           | 1.18             | 9.884e-01         |                   | 1.20e-01     | 1.29e-01          | 3.79e-01         |
| [ 49.7,58.8)              | 18              | 8             | 44.44         | 9.007e-01 | 3.452e-01     | 2.351         | 8.308e-01      | 4.09             | 8.543e-01         |                   |              |                   |                  |
| [ 58.8,73.3)              | 19              | 6             | 31.58         | 5.150e-01 | 1.807e-01     | 1.468         | 2.145e-01      | 1.93             | 1.552             |                   |              |                   |                  |
| ≥ 73.3                    | 19              | 5             | 26.32         | 3.122e-01 | 1.045e-01     | 9.328e-01     | 3.711e-02      | 5.13             | 2.199             |                   |              |                   |                  |
| <b>Tertiles</b>           |                 |               |               |           |               |               |                |                  |                   |                   |              |                   |                  |
| < 51.8                    | 25              | 12            | 48.00         | ----      | ----          | ----          | ----           | 1.18             | 9.884e-01         |                   | 1.95e-03     | 4.05e-03          | 1.88e-01         |
| [ 51.8,68.1)              | 25              | 12            | 48.00         | 1.004     | 4.368e-01     | 2.307         | 9.927e-01      | 1.55             | 9.363e-01         |                   |              |                   |                  |
| ≥ 68.1                    | 25              | 5             | 20.00         | 1.958e-01 | 6.205e-02     | 6.180e-01     | 5.423e-03      | 5.13             | 2.404             |                   |              |                   |                  |
| <b>Profile Likelihood</b> |                 |               |               |           |               |               |                |                  |                   |                   |              |                   |                  |
| < 62.3                    | 46              | 23            | 50.00         | ----      | ----          | ----          | ----           | 1.19             | 9.884e-01         |                   | 2.56e-04     | 4.32e-04          | 6.81e-02         |
| ≥ 62.3                    | 29              | 6             | 20.69         | 2.032e-01 | 7.651e-02     | 5.398e-01     | 1.389e-03      | 5.13             | 2.404             |                   |              |                   |                  |
| <b>Quantitative</b>       |                 |               |               |           |               |               |                |                  |                   |                   |              |                   |                  |
|                           | 75              | 29            | 38.67         | 9.661e-01 | 9.454e-01     | 9.873e-01     | 1.856e-03      |                  |                   |                   | 1.381e-03    | 1.545e-03         |                  |

**Cohort: Validation**  
**Outcome: Mortality**  
**Predictor: Baseline (3-month) DLco % Predicted**

|                           | Patients<br>(N) | Events<br>(n) | Events<br>(%) | HR        | HR<br>95% LCL | HR<br>95% UCL | Wald<br>pvalue | Median<br>(yrs.) | Median<br>95% LCL | Median<br>95% UCL | LR<br>pvalue | Logrank<br>pvalue | DevLIN<br>pvalue |
|---------------------------|-----------------|---------------|---------------|-----------|---------------|---------------|----------------|------------------|-------------------|-------------------|--------------|-------------------|------------------|
| <b>Quintiles</b>          |                 |               |               |           |               |               |                |                  |                   |                   |              |                   |                  |
| < 28.6                    | 14              | 7             | 50.00         | ----      | ----          | ----          | ----           | 1.13             | 4.353e-01         |                   | 2.67e-02     | 6.82e-03          | 4.87e-01         |
| [ 28.6,38.3)              | 14              | 5             | 35.71         | 4.696e-01 | 1.478e-01     | 1.491         | 1.998e-01      | 1.19             | 1.008             |                   |              |                   |                  |
| [ 38.3,46)                | 13              | 5             | 38.46         | 1.874e-01 | 5.472e-02     | 6.420e-01     | 7.690e-03      | 4.09             | 1.914             |                   |              |                   |                  |
| [ 46,61.3)                | 15              | 6             | 40.00         | 2.363e-01 | 7.627e-02     | 7.323e-01     | 1.242e-02      | 2.89             | 2.404             |                   |              |                   |                  |
| ≥ 61.3                    | 14              | 3             | 21.43         | 1.301e-01 | 3.152e-02     | 5.368e-01     | 4.800e-03      | 5.13             |                   |                   |              |                   |                  |
| <b>Quartiles</b>          |                 |               |               |           |               |               |                |                  |                   |                   |              |                   |                  |
| < 30.9                    | 18              | 8             | 44.44         | ----      | ----          | ----          | ----           | 1.13             | 5.940e-01         |                   | 5.59e-02     | 4.16e-02          | 6.86e-01         |
| [ 30.9,43.8)              | 17              | 6             | 35.29         | 4.300e-01 | 1.402e-01     | 1.318         | 1.398e-01      | 1.91             | 1.008             |                   |              |                   |                  |
| [ 43.8,55.1)              | 17              | 8             | 47.06         | 4.384e-01 | 1.612e-01     | 1.192         | 1.063e-01      | 2.89             | 2.199             |                   |              |                   |                  |
| ≥ 55.1                    | 18              | 4             | 22.22         | 1.859e-01 | 5.295e-02     | 6.528e-01     | 8.654e-03      | 4.30             | 4.301             |                   |              |                   |                  |
| <b>Tertiles</b>           |                 |               |               |           |               |               |                |                  |                   |                   |              |                   |                  |
| < 33.8                    | 23              | 10            | 43.48         | ----      | ----          | ----          | ----           | 1.13             | 9.884e-01         |                   | 1.77e-02     | 1.37e-02          | 9.53e-01         |
| [ 33.8,47.4)              | 24              | 11            | 45.83         | 4.663e-01 | 1.908e-01     | 1.140         | 9.430e-02      | 2.20             | 1.563             |                   |              |                   |                  |
| ≥ 47.4                    | 23              | 5             | 21.74         | 2.125e-01 | 6.953e-02     | 6.495e-01     | 6.587e-03      | 4.30             | 2.404             |                   |              |                   |                  |
| <b>Profile Likelihood</b> |                 |               |               |           |               |               |                |                  |                   |                   |              |                   |                  |
| < 39.5                    | 29              | 13            | 44.83         | ----      | ----          | ----          | ----           | 1.13             | 9.363e-01         |                   | 1.05e-03     | 3.81e-04          | 1.66e-01         |
| ≥ 39.5                    | 41              | 13            | 31.71         | 2.415e-01 | 1.039e-01     | 5.613e-01     | 9.584e-04      | 4.09             | 2.404             |                   |              |                   |                  |
| <b>Quantitative</b>       |                 |               |               |           |               |               |                |                  |                   |                   |              |                   |                  |
|                           | 70              | 26            | 37.14         | 9.606e-01 | 9.347e-01     | 9.872e-01     | 3.904e-03      |                  |                   |                   | 1.369e-03    | 3.463e-03         |                  |

**Cohort: Validation**  
**Outcome: Mortality**  
**Predictor: Baseline (3-month) CPI**

|                           | Patients<br>(N) | Events<br>(n) | Events<br>(%) | HR    | HR<br>95% LCL | HR<br>95% UCL | Wald<br>pvalue | Median<br>(yrs.) | Median<br>95% LCL | Median<br>95% UCL | LR<br>pvalue | Logrank<br>pvalue | DevLIN<br>pvalue |
|---------------------------|-----------------|---------------|---------------|-------|---------------|---------------|----------------|------------------|-------------------|-------------------|--------------|-------------------|------------------|
| <b>Quintiles</b>          |                 |               |               |       |               |               |                |                  |                   |                   |              |                   |                  |
| < 42.9                    | 14              | 2             | 14.29         | ----  | ----          | ----          | ----           | 5.13             |                   |                   | 1.94e-02     | 1.57e-02          | 1.52e-01         |
| [ 42.9,51.7)              | 14              | 6             | 42.86         | 3.247 | 6.322e-01     | 1.668e+01     | 1.583e-01      | 2.40             | 1.914             |                   |              |                   |                  |
| [ 51.7,59.8)              | 14              | 5             | 35.71         | 2.188 | 4.227e-01     | 1.133e+01     | 3.506e-01      | 2.89             | 1.930             |                   |              |                   |                  |
| [ 59.8,66)                | 14              | 7             | 50.00         | 8.416 | 1.639         | 4.321e+01     | 1.071e-02      | 1.01             | 5.940e-01         |                   |              |                   |                  |
| ≥ 66                      | 14              | 6             | 42.86         | 7.865 | 1.497         | 4.133e+01     | 1.484e-02      | 1.13             | 9.884e-01         |                   |              |                   |                  |
| <b>Quartiles</b>          |                 |               |               |       |               |               |                |                  |                   |                   |              |                   |                  |
| < 45.4                    | 18              | 4             | 22.22         | ----  | ----          | ----          | ----           | 2.40             | 2.199             |                   | 1.13e-03     | 2.46e-04          | 2.67e-01         |
| [ 45.4,56)                | 17              | 5             | 29.41         | 1.059 | 2.775e-01     | 4.043         | 9.330e-01      | 4.09             | 1.914             |                   |              |                   |                  |
| [ 56,64.8)                | 17              | 7             | 41.18         | 3.488 | 9.594e-01     | 1.268e+01     | 5.781e-02      | 1.93             | 1.185             |                   |              |                   |                  |
| ≥ 64.8                    | 18              | 10            | 55.56         | 7.873 | 2.295         | 2.701e+01     | 1.035e-03      | 1.01             | 4.353e-01         |                   |              |                   |                  |
| <b>Tertiles</b>           |                 |               |               |       |               |               |                |                  |                   |                   |              |                   |                  |
| < 50.3                    | 23              | 7             | 30.43         | ----  | ----          | ----          | ----           | 2.40             | 2.199             |                   | 9.18e-03     | 3.03e-03          | 1.38e-01         |
| [ 50.3,62.2)              | 24              | 8             | 33.33         | 1.186 | 4.274e-01     | 3.292         | 7.430e-01      | 4.09             | 1.930             |                   |              |                   |                  |
| ≥ 62.2                    | 23              | 11            | 47.83         | 4.213 | 1.543         | 1.150e+01     | 5.010e-03      | 1.01             | 5.940e-01         |                   |              |                   |                  |
| <b>Profile Likelihood</b> |                 |               |               |       |               |               |                |                  |                   |                   |              |                   |                  |
| <56.0                     | 35              | 9             | 25.71         | ----  | ----          | ----          | ----           | 4.30             | 2.404             |                   | 2.69e-04     | 2.06e-04          | 1.52e-01         |
| ≥56.0                     | 35              | 17            | 48.57         | 5.004 | 1.957         | 1.280e+01     | 7.758e-04      | 1.18             | 9.884e-01         |                   |              |                   |                  |
| <b>Quantitative</b>       | 70              | 26            | 37.14         | 1.064 | 1.024         | 1.106         | 1.601e-03      |                  |                   |                   | 3.673e-04    | 1.210e-03         |                  |

**Cohort: Validation**  
**Outcome: Mortality**  
**Predictor: MMP7Elisa ( ng / mL )**

|                           | Patients<br>(N) | Events<br>(n) | Events<br>(%) | HR    | HR<br>95% LCL | HR<br>95% UCL | Wald<br>pvalue | Median<br>(yrs.) | Median<br>95% LCL | Median<br>95% UCL | LR<br>pvalue | Logrank<br>pvalue | DevLIN<br>pvalue |
|---------------------------|-----------------|---------------|---------------|-------|---------------|---------------|----------------|------------------|-------------------|-------------------|--------------|-------------------|------------------|
| <b>Quintiles</b>          |                 |               |               |       |               |               |                |                  |                   |                   |              |                   |                  |
| < 3.41                    | 20              | 7             | 35.00         | ----  | ----          | ----          | ----           | 4.30             | 9.363e-01         |                   | 9.12e-01     | 9.18e-01          | 8.45e-01         |
| [ 3.41,4.56)              | 20              | 9             | 45.00         | 1.567 | 5.681e-01     | 4.324         | 3.854e-01      | 1.91             | 1.511             |                   |              |                   |                  |
| [ 4.56,5.49)              | 20              | 11            | 55.00         | 1.315 | 5.071e-01     | 3.411         | 5.731e-01      | 2.89             | 9.884e-01         |                   |              |                   |                  |
| [ 5.49,7.52)              | 20              | 7             | 35.00         | 1.344 | 4.594e-01     | 3.930         | 5.896e-01      | 0.00             | 1.008             |                   |              |                   |                  |
| ≥ 7.52                    | 21              | 9             | 42.86         | 1.546 | 5.608e-01     | 4.262         | 3.998e-01      | 2.37             | 1.322             |                   |              |                   |                  |
| <b>Quartiles</b>          |                 |               |               |       |               |               |                |                  |                   |                   |              |                   |                  |
| < 3.54                    | 25              | 9             | 36.00         | ----  | ----          | ----          | ----           | 4.30             | 1.563             |                   | 4.83e-01     | 4.86e-01          | 2.92e-01         |
| [ 3.54,4.94)              | 25              | 12            | 48.00         | 1.808 | 7.543e-01     | 4.335         | 1.842e-01      | 1.93             | 1.914             |                   |              |                   |                  |
| [ 4.94,6.46)              | 25              | 11            | 44.00         | 1.238 | 5.110e-01     | 2.999         | 6.363e-01      | 2.89             | 1.008             |                   |              |                   |                  |
| ≥ 6.46                    | 26              | 11            | 42.31         | 1.757 | 7.142e-01     | 4.324         | 2.197e-01      | 1.55             | 1.180             |                   |              |                   |                  |
| <b>Tertiles</b>           |                 |               |               |       |               |               |                |                  |                   |                   |              |                   |                  |
| < 3.99                    | 34              | 12            | 35.29         | ----  | ----          | ----          | ----           | 4.30             | 1.563             |                   | 5.51e-01     | 5.63e-01          | 3.90e-01         |
| [ 3.99,5.91)              | 33              | 18            | 54.55         | 1.420 | 6.814e-01     | 2.961         | 3.491e-01      | 2.05             | 1.008             |                   |              |                   |                  |
| ≥ 5.91                    | 34              | 13            | 38.24         | 1.466 | 6.604e-01     | 3.254         | 3.471e-01      | 2.37             | 1.185             |                   |              |                   |                  |
| <b>Profile Likelihood</b> |                 |               |               |       |               |               |                |                  |                   |                   |              |                   |                  |
| < 3.5                     | 24              | 8             | 33.33         | ----  | ----          | ----          | ----           | 4.30             | 1.563             |                   | 1.51e-01     | 1.68e-01          | 1.18e-01         |
| ≥ 3.5                     | 77              | 35            | 45.45         | 1.715 | 7.899e-01     | 3.722         | 1.727e-01      | 2.20             | 1.511             | 3.565             |              |                   |                  |
| <b>Quantitative</b>       |                 |               |               |       |               |               |                |                  |                   |                   |              |                   |                  |
|                           | 101             | 43            | 42.57         | 1.006 | 9.178e-01     | 1.104         | 8.916e-01      |                  |                   |                   | 8.925e-01    | 8.916e-01         |                  |



Cohort: Validation  
 Outcome: Mortality  
 Predictor: ICAM ( ng / mL )

|                           | Patients (N) | Events (n) | Events (%) | HR        | HR 95% LCL | HR 95% UCL | Wald pvalue | Median (yrs.) | Median 95% LCL | Median 95% UCL | LR pvalue | Logrank pvalue | DevLIN pvalue |
|---------------------------|--------------|------------|------------|-----------|------------|------------|-------------|---------------|----------------|----------------|-----------|----------------|---------------|
| <b>Quintiles</b>          |              |            |            |           |            |            |             |               |                |                |           |                |               |
| < 226                     | 20           | 5          | 25.00      | ----      | ----       | ----       | ----        | 5.13          |                |                | 5.36e-02  | 4.66e-02       | 1.35e-01      |
| [ 226,281)                | 20           | 9          | 45.00      | 1.282     | 4.261e-01  | 3.858      | 6.583e-01   | 2.89          | 2.199          |                |           |                |               |
| [ 281,326)                | 20           | 8          | 40.00      | 2.684     | 8.404e-01  | 8.574      | 9.560e-02   | 2.05          | 8.543e-01      |                |           |                |               |
| [ 326,419)                | 20           | 11         | 55.00      | 4.205     | 1.400      | 1.263e+01  | 1.048e-02   | 1.32          | 6.652e-01      |                |           |                |               |
| ≥ 419                     | 21           | 10         | 47.62      | 2.431     | 7.995e-01  | 7.395      | 1.174e-01   | 2.34          | 1.185          |                |           |                |               |
| <b>Quartiles</b>          |              |            |            |           |            |            |             |               |                |                |           |                |               |
| < 238                     | 25           | 8          | 32.00      | ----      | ----       | ----       | ----        | 4.09          | 4.087          |                | 1.32e-02  | 1.14e-02       | 4.49e-02      |
| [ 238,303)                | 25           | 8          | 32.00      | 8.661e-01 | 3.218e-01  | 2.331      | 7.759e-01   | 2.89          | 2.199          |                |           |                |               |
| [ 303,387)                | 25           | 14         | 56.00      | 3.157     | 1.273      | 7.830      | 1.309e-02   | 1.32          | 8.543e-01      |                |           |                |               |
| ≥ 387                     | 26           | 13         | 50.00      | 2.273     | 9.094e-01  | 5.683      | 7.894e-02   | 1.56          | 1.185          |                |           |                |               |
| <b>Tertiles</b>           |              |            |            |           |            |            |             |               |                |                |           |                |               |
| < 258                     | 34           | 11         | 32.35      | ----      | ----       | ----       | ----        | 4.09          | 2.199          |                | 4.70e-02  | 5.29e-02       | 1.93e-01      |
| [ 258,367)                | 33           | 14         | 42.42      | 1.943     | 8.601e-01  | 4.390      | 1.102e-01   | 1.93          | 1.322          |                |           |                |               |
| ≥ 367                     | 34           | 18         | 52.94      | 2.582     | 1.169      | 5.701      | 1.891e-02   | 1.55          | 9.884e-01      |                |           |                |               |
| <b>Profile Likelihood</b> |              |            |            |           |            |            |             |               |                |                |           |                |               |
| <300.0                    | 50           | 16         | 32.00      | ----      | ----       | ----       | ----        | 4.09          | 2.888          |                | 1.62e-03  | 1.65e-03       | 4.55e-03      |
| ≥300.0                    | 51           | 27         | 52.94      | 2.851     | 1.441      | 5.640      | 2.616e-03   | 1.55          | 9.884e-01      | 2.404          |           |                |               |
| <b>Quantitative</b>       | 101          | 43         | 42.57      | 1.003     | 0.9998     | 1.005      | 6.758e-02   |               |                |                | 7.171e-02 | 6.585e-02      |               |

Cohort: **Validation**  
 Outcome: **Mortality**  
 Predictor: **IL8 ( ng / mL )**

|                           | Patients<br>(N) | Events<br>(n) | Events<br>(%) | HR    | HR<br>95% LCL | HR<br>95% UCL | Wald<br>pvalue | Median<br>(yrs.) | Median<br>95% LCL | Median<br>95% UCL | LR<br>pvalue | Logrank<br>pvalue | DevLIN<br>pvalue |
|---------------------------|-----------------|---------------|---------------|-------|---------------|---------------|----------------|------------------|-------------------|-------------------|--------------|-------------------|------------------|
| <b>Quintiles</b>          |                 |               |               |       |               |               |                |                  |                   |                   |              |                   |                  |
| < 0.00767                 | 20              | 7             | 35.00         | ----  | ----          | ----          | ----           | 4.09             | 2.199             |                   | 1.71e-01     | 1.72e-01          | 6.05e-01         |
| [ 0.00767,0.0101)         | 20              | 7             | 35.00         | 2.274 | 7.812e-01     | 6.620         | 1.318e-01      | 2.37             | 1.930             |                   |              |                   |                  |
| [ 0.0101,0.0131)          | 19              | 8             | 42.11         | 2.185 | 7.625e-01     | 6.263         | 1.456e-01      | 4.92             | 5.532e-01         |                   |              |                   |                  |
| [ 0.0131,0.0178)          | 20              | 9             | 45.00         | 3.177 | 1.147         | 8.804         | 2.621e-02      | 1.56             | 8.543e-01         |                   |              |                   |                  |
| ≥ 0.0178                  | 20              | 12            | 60.00         | 1.472 | 4.771e-01     | 4.541         | 5.013e-01      | 1.55             | 9.363e-01         |                   |              |                   |                  |
| <b>Quartiles</b>          |                 |               |               |       |               |               |                |                  |                   |                   |              |                   |                  |
| < 0.00825                 | 25              | 8             | 32.00         | ----  | ----          | ----          | ----           | 4.09             | 2.199             |                   | 3.60e-02     | 3.89e-02          | 1.86e-01         |
| [ 0.00825,0.0112)         | 24              | 10            | 41.67         | 1.816 | 6.736e-01     | 4.897         | 2.383e-01      | 2.05             | 1.180             |                   |              |                   |                  |
| [ 0.0112,0.0164)          | 25              | 9             | 36.00         | 3.612 | 1.427         | 9.145         | 6.728e-03      | 4.30             | 8.350e-01         |                   |              |                   |                  |
| ≥ 0.0164                  | 25              | 16            | 64.00         | 2.556 | 9.249e-01     | 7.064         | 7.038e-02      | 1.55             | 9.884e-01         |                   |              |                   |                  |
| <b>Tertiles</b>           |                 |               |               |       |               |               |                |                  |                   |                   |              |                   |                  |
| < 0.00959                 | 33              | 9             | 27.27         | ----  | ----          | ----          | ----           | 5.13             | 2.199             |                   | 1.08e-02     | 1.59e-02          | 6.81e-02         |
| [ 0.00959,0.015)          | 33              | 15            | 45.45         | 3.160 | 1.368         | 7.302         | 7.077e-03      | 2.05             | 1.180             |                   |              |                   |                  |
| ≥ 0.015                   | 33              | 19            | 57.58         | 2.682 | 1.127         | 6.383         | 2.574e-02      | 1.55             | 9.884e-01         |                   |              |                   |                  |
| <b>Profile Likelihood</b> |                 |               |               |       |               |               |                |                  |                   |                   |              |                   |                  |
| < 0.0097                  | 34              | 9             | 26.47         | ----  | ----          | ----          | ----           | 5.13             | 4.087             |                   | 1.80e-03     | 2.97e-03          | 1.33e-02         |
| ≥ 0.0097                  | 65              | 34            | 52.31         | 3.071 | 1.411         | 6.682         | 4.673e-03      | 1.91             | 1.180             | 2.888             |              |                   |                  |
| <b>Quantitative*</b>      |                 |               |               |       |               |               |                |                  |                   |                   |              |                   |                  |
|                           | 99              | 43            | 43.43         | 1.030 | 1.005         | 1.056         | 1.670e-02      |                  |                   |                   | 4.863e-02    | 1.693e-02         |                  |

\*Units of pg / mL were used in **Quantitative model only**.

**Cohort: Validation**  
**Outcome: Mortality**  
**Predictor: VCAM ( ng / mL )**

|                           | Patients<br>(N) | Events<br>(n) | Events<br>(%) | HR        | HR<br>95% LCL | HR<br>95% UCL | Wald<br>pvalue | Median<br>(yrs.) | Median<br>95% LCL | Median<br>95% UCL | LR<br>pvalue | Logrank<br>pvalue | DevLIN<br>pvalue |
|---------------------------|-----------------|---------------|---------------|-----------|---------------|---------------|----------------|------------------|-------------------|-------------------|--------------|-------------------|------------------|
| <b>Quintiles</b>          |                 |               |               |           |               |               |                |                  |                   |                   |              |                   |                  |
| < 222                     | 20              | 8             | 40.00         | ----      | ----          | ----          | ----           | 2.89             | 1.008             |                   | 3.40e-01     | 3.25e-01          | 2.64e-01         |
| [ 222,260)                | 20              | 11            | 55.00         | 1.646     | 6.494e-01     | 4.172         | 2.937e-01      | 1.19             | 7.995e-01         |                   |              |                   |                  |
| [ 260,310)                | 20              | 6             | 30.00         | 6.746e-01 | 2.310e-01     | 1.969         | 4.714e-01      | 4.09             | 2.371             |                   |              |                   |                  |
| [ 310,376)                | 20              | 9             | 45.00         | 8.410e-01 | 3.233e-01     | 2.188         | 7.226e-01      | 2.05             | 1.552             |                   |              |                   |                  |
| ≥ 376                     | 21              | 9             | 42.86         | 1.466     | 5.514e-01     | 3.895         | 4.434e-01      | 2.34             | 1.563             |                   |              |                   |                  |
| <b>Quartiles</b>          |                 |               |               |           |               |               |                |                  |                   |                   |              |                   |                  |
| < 230                     | 25              | 11            | 44.00         | ----      | ----          | ----          | ----           | 2.20             | 1.008             |                   | 9.71e-01     | 9.71e-01          | 9.67e-01         |
| [ 230,285)                | 25              | 12            | 48.00         | 1.024     | 4.472e-01     | 2.346         | 9.550e-01      | 4.09             | 9.884e-01         |                   |              |                   |                  |
| [ 285,358)                | 25              | 10            | 40.00         | 8.439e-01 | 3.544e-01     | 2.009         | 7.013e-01      | 2.37             | 1.552             |                   |              |                   |                  |
| ≥ 358                     | 26              | 10            | 38.46         | 9.226e-01 | 3.911e-01     | 2.176         | 8.541e-01      | 2.34             | 1.563             |                   |              |                   |                  |
| <b>Tertiles</b>           |                 |               |               |           |               |               |                |                  |                   |                   |              |                   |                  |
| < 246                     | 34              | 16            | 47.06         | ----      | ----          | ----          | ----           | 1.13             | 8.350e-01         |                   | 2.93e-01     | 2.94e-01          | 2.59e-01         |
| [ 246,334)                | 33              | 12            | 36.36         | 5.494e-01 | 2.576e-01     | 1.172         | 1.213e-01      | 2.37             | 1.930             |                   |              |                   |                  |
| ≥ 334                     | 34              | 15            | 44.12         | 7.790e-01 | 3.839e-01     | 1.581         | 4.890e-01      | 2.34             | 1.511             |                   |              |                   |                  |
| <b>Profile Likelihood</b> |                 |               |               |           |               |               |                |                  |                   |                   |              |                   |                  |
| <246.8                    | 34              | 16            | 47.06         | ----      | ----          | ----          | ----           | 1.13             | 8.350e-01         |                   | 1.99e-01     | 1.87e-01          | 1.09e-01         |
| ≥246.8                    | 67              | 27            | 40.30         | 6.590e-01 | 3.530e-01     | 1.230         | 1.903e-01      | 2.37             | 1.930             |                   |              |                   |                  |
| <b>Quantitative</b>       | 101             | 43            | 42.57         | 0.9998    | 0.9968        | 1.003         | 8.905e-01      |                  |                   |                   | 8.900e-01    | 8.905e-01         |                  |

**Cohort: Validation**  
**Outcome: Mortality**  
**Predictor: S100A12 ( ng / mL )**

|                           | Patients<br>(N) | Events<br>(n) | Events<br>(%) | HR        | HR<br>95% LCL | HR<br>95% UCL | Wald<br>pvalue | Median<br>(yrs.) | Median<br>95% LCL | Median<br>95% UCL | LR<br>pvalue | Logrank<br>pvalue | DevLIN<br>pvalue |
|---------------------------|-----------------|---------------|---------------|-----------|---------------|---------------|----------------|------------------|-------------------|-------------------|--------------|-------------------|------------------|
| <b>Quintiles</b>          |                 |               |               |           |               |               |                |                  |                   |                   |              |                   |                  |
| < 36.6                    | 20              | 8             | 40.00         | ----      | ----          | ----          | ----           | 1.93             | 1.322             |                   | 1.13e-01     | 9.98e-02          | 4.55e-02         |
| [ 36.6,49.2)              | 20              | 4             | 20.00         | 8.296e-01 | 3.149e-01     | 2.186         | 7.054e-01      | 3.56             | 2.045             |                   |              |                   |                  |
| [ 49.2,65.9)              | 20              | 9             | 45.00         | 4.521e-01 | 1.348e-01     | 1.516         | 1.984e-01      | 2.34             | 1.128             |                   |              |                   |                  |
| [ 65.9,105)               | 20              | 12            | 60.00         | 1.097     | 4.186e-01     | 2.876         | 8.503e-01      | 1.18             | 7.939e-01         |                   |              |                   |                  |
| ≥ 105                     | 21              | 10            | 47.62         | 1.866     | 7.550e-01     | 4.609         | 1.766e-01      | 4.09             | 9.884e-01         |                   |              |                   |                  |
| <b>Quartiles</b>          |                 |               |               |           |               |               |                |                  |                   |                   |              |                   |                  |
| < 39.7                    | 25              | 10            | 40.00         | ----      | ----          | ----          | ----           | 2.05             | 1.563             |                   | 7.85e-01     | 7.83e-01          | 6.55e-01         |
| [ 39.7,54.5)              | 25              | 8             | 32.00         | 8.132e-01 | 3.192e-01     | 2.072         | 6.648e-01      | 2.37             | 2.199             |                   |              |                   |                  |
| [ 54.5,82.8)              | 25              | 12            | 48.00         | 1.297     | 5.553e-01     | 3.029         | 5.481e-01      | 1.91             | 1.128             |                   |              |                   |                  |
| ≥ 82.8                    | 26              | 13            | 50.00         | 1.059     | 4.526e-01     | 2.478         | 8.948e-01      | 1.55             | 9.884e-01         |                   |              |                   |                  |
| <b>Tertiles</b>           |                 |               |               |           |               |               |                |                  |                   |                   |              |                   |                  |
| < 43.9                    | 34              | 11            | 32.35         | ----      | ----          | ----          | ----           | 3.56             | 1.930             |                   | 3.71e-01     | 3.68e-01          | 3.72e-01         |
| [ 43.9,72.3)              | 33              | 14            | 42.42         | 1.289     | 5.822e-01     | 2.854         | 5.313e-01      | 2.37             | 1.914             |                   |              |                   |                  |
| ≥ 72.3                    | 34              | 18            | 52.94         | 1.719     | 7.989e-01     | 3.697         | 1.658e-01      | 1.19             | 9.884e-01         |                   |              |                   |                  |
| <b>Profile Likelihood</b> |                 |               |               |           |               |               |                |                  |                   |                   |              |                   |                  |
| < 49.1                    | 40              | 12            | 30.00         | ----      | ----          | ----          | ----           | 2.40             | 2.045             |                   | 1.27e-01     | 1.35e-01          | 1.75e-01         |
| ≥ 49.1                    | 61              | 31            | 50.82         | 1.663     | 8.471e-01     | 3.266         | 1.394e-01      | 1.91             | 1.128             |                   |              |                   |                  |
| <b>Quantitative</b>       | 101             | 43            | 42.57         | 1.002     | 0.9967        | 1.007         | 4.578e-01      |                  |                   |                   | 4.708e-01    | 4.573e-01         |                  |

**Cohort: Validation**  
**Outcome: Transplant Free Survival**  
**Predictor: Age (years)**

|                           | Patients<br>(N) | Events<br>(n) | Events<br>(%) | HR    | HR<br>95% LCL | HR<br>95% UCL | Wald<br>pvalue | Median<br>(yrs.) | Median<br>95% LCL | Median<br>95% UCL | LR<br>pvalue | Logrank<br>pvalue | DevLIN<br>pvalue |
|---------------------------|-----------------|---------------|---------------|-------|---------------|---------------|----------------|------------------|-------------------|-------------------|--------------|-------------------|------------------|
| <b>Quintiles</b>          |                 |               |               |       |               |               |                |                  |                   |                   |              |                   |                  |
| < 61.6                    | 20              | 9             | 45.00         | ----  | ----          | ----          | ----           | 4.05             | 1.927             |                   | 9.22e-03     | 7.53e-03          | 7.39e-04         |
| [ 61.6,66.5)              | 20              | 17            | 85.00         | 3.927 | 1.720         | 8.966         | 1.163e-03      | 0.59             | 4.519e-01         | 2.199             |              |                   |                  |
| [ 66.5,70.1)              | 20              | 13            | 65.00         | 2.168 | 9.164e-01     | 5.127         | 7.819e-02      | 1.01             | 6.515e-01         |                   |              |                   |                  |
| [ 70.1,77.1)              | 20              | 10            | 50.00         | 1.519 | 6.078e-01     | 3.797         | 3.709e-01      | 2.34             | 1.128             |                   |              |                   |                  |
| ≥ 77.1                    | 21              | 14            | 66.67         | 2.826 | 1.187         | 6.725         | 1.886e-02      | 1.55             | 9.363e-01         |                   |              |                   |                  |
| <b>Quartiles</b>          |                 |               |               |       |               |               |                |                  |                   |                   |              |                   |                  |
| < 62.8                    | 25              | 12            | 48.00         | ----  | ----          | ----          | ----           | 3.98             | 1.136             |                   | 5.28e-02     | 4.35e-02          | 5.40e-02         |
| [ 62.8,68.4)              | 25              | 20            | 80.00         | 2.750 | 1.321         | 5.723         | 6.834e-03      | 0.68             | 5.285e-01         | 2.199             |              |                   |                  |
| [ 68.4,75)                | 25              | 15            | 60.00         | 1.618 | 7.493e-01     | 3.495         | 2.204e-01      | 1.32             | 8.350e-01         |                   |              |                   |                  |
| ≥ 75                      | 26              | 16            | 61.54         | 1.583 | 7.397e-01     | 3.389         | 2.366e-01      | 1.91             | 1.511             |                   |              |                   |                  |
| <b>Tertiles</b>           |                 |               |               |       |               |               |                |                  |                   |                   |              |                   |                  |
| < 65.3                    | 34              | 20            | 58.82         | ----  | ----          | ----          | ----           | 1.93             | 6.845e-01         |                   | 4.56e-01     | 4.48e-01          | 5.26e-01         |
| [ 65.3,72.8)              | 33              | 23            | 69.70         | 1.466 | 8.004e-01     | 2.686         | 2.153e-01      | 1.01             | 5.285e-01         |                   |              |                   |                  |
| ≥ 72.8                    | 34              | 20            | 58.82         | 1.154 | 6.154e-01     | 2.165         | 6.548e-01      | 1.91             | 1.511             |                   |              |                   |                  |
| <b>Profile Likelihood</b> |                 |               |               |       |               |               |                |                  |                   |                   |              |                   |                  |
| <61.8                     | 21              | 10            | 47.62         | ----  | ----          | ----          | ----           | 3.98             | 1.136             |                   | 1.67e-02     | 2.36e-02          | 3.04e-03         |
| ≥61.8                     | 80              | 53            | 66.25         | 2.188 | 1.094         | 4.374         | 2.675e-02      | 1.32             | 9.363e-01         | 2.045             |              |                   |                  |
| <b>Quantitative</b>       |                 |               |               |       |               |               |                |                  |                   |                   |              |                   |                  |
|                           | 101             | 63            | 62.38         | 1.009 | 9.812e-01     | 1.037         | 5.373e-01      |                  |                   |                   | 5.342e-01    | 5.373e-01         |                  |
| <b>Predictor: Gender</b>  |                 |               |               |       |               |               |                |                  |                   |                   |              |                   |                  |
| Female                    | 36              | 18            | 50.00         | ----  | ----          | ----          | ----           | 2.37             | 1.933             |                   |              |                   |                  |
| Male                      | 65              | 45            | 69.23         | 1.73  | 0.997         | 3.013         | 5.13E-02       | 1.19             | 0.835             | 1.93              | 4.38E-02     | 4.86E-02          |                  |

**Cohort: Validation**  
**Outcome: Transplant Free Survival**  
**Predictor: Baseline (4-month) FVC % Predicted**

|                           | Patients<br>(N) | Events<br>(n) | Events<br>(%) | HR        | HR<br>95% LCL | HR<br>95% UCL | Wald<br>pvalue | Median<br>(yrs.) | Median<br>95% LCL | Median<br>95% UCL | LR<br>pvalue | Logrank<br>pvalue | DevLIN<br>pvalue |
|---------------------------|-----------------|---------------|---------------|-----------|---------------|---------------|----------------|------------------|-------------------|-------------------|--------------|-------------------|------------------|
| <b>Quintiles</b>          |                 |               |               |           |               |               |                |                  |                   |                   |              |                   |                  |
| < 48.7                    | 18              | 14            | 77.78         | ----      | ----          | ----          | ----           | 0.99             | 5.258e-01         |                   | 6.45e-02     | 8.35e-02          | 8.69e-01         |
| [ 48.7,54.9)              | 17              | 14            | 82.35         | 9.593e-01 | 4.518e-01     | 2.037         | 9.139e-01      | 1.13             | 4.764e-01         |                   |              |                   |                  |
| [ 54.9,62)                | 17              | 11            | 64.71         | 8.544e-01 | 3.805e-01     | 1.919         | 7.030e-01      | 1.14             | 8.543e-01         |                   |              |                   |                  |
| [ 62,77.2)                | 18              | 9             | 50.00         | 5.308e-01 | 2.251e-01     | 1.252         | 1.479e-01      | 1.93             | 6.515e-01         |                   |              |                   |                  |
| ≥ 77.2                    | 18              | 7             | 38.89         | 3.270e-01 | 1.304e-01     | 8.203e-01     | 1.721e-02      | 2.40             | 2.199             |                   |              |                   |                  |
| <b>Quartiles</b>          |                 |               |               |           |               |               |                |                  |                   |                   |              |                   |                  |
| < 49.7                    | 22              | 17            | 77.27         | ----      | ----          | ----          | ----           | 1.01             | 5.940e-01         | 3.565             | 9.60e-02     | 1.06e-01          | 9.07e-01         |
| [ 49.7,58.2)              | 22              | 17            | 77.27         | 9.314e-01 | 4.683e-01     | 1.852         | 8.393e-01      | 0.85             | 6.652e-01         |                   |              |                   |                  |
| [ 58.2,72.6)              | 22              | 11            | 50.00         | 6.182e-01 | 2.849e-01     | 1.342         | 2.238e-01      | 1.55             | 6.515e-01         |                   |              |                   |                  |
| ≥ 72.6                    | 22              | 10            | 45.45         | 4.161e-01 | 1.886e-01     | 9.180e-01     | 2.986e-02      | 2.20             | 1.927             |                   |              |                   |                  |
| <b>Tertiles</b>           |                 |               |               |           |               |               |                |                  |                   |                   |              |                   |                  |
| < 51.8                    | 29              | 23            | 79.31         | ----      | ----          | ----          | ----           | 0.99             | 5.258e-01         | 2.888             | 4.81e-03     | 7.36e-03          | 2.19e-01         |
| [ 51.8,67.6)              | 30              | 20            | 66.67         | 8.745e-01 | 4.731e-01     | 1.616         | 6.687e-01      | 1.14             | 6.845e-01         |                   |              |                   |                  |
| ≥ 67.6                    | 29              | 12            | 41.38         | 3.402e-01 | 1.642e-01     | 7.047e-01     | 3.711e-03      | 2.40             | 1.927             |                   |              |                   |                  |
| <b>Profile Likelihood</b> |                 |               |               |           |               |               |                |                  |                   |                   |              |                   |                  |
| < 69.0                    | 60              | 44            | 73.33         | ----      | ----          | ----          | ----           | 1.01             | 6.845e-01         | 1.930             | 4.93e-04     | 9.38e-04          | 3.38e-02         |
| ≥ 69.0                    | 28              | 11            | 39.29         | 3.286e-01 | 1.645e-01     | 6.564e-01     | 1.621e-03      | 2.40             | 1.933             |                   |              |                   |                  |
| <b>Quantitative</b>       |                 |               |               |           |               |               |                |                  |                   |                   |              |                   |                  |
|                           | 88              | 55            | 62.50         | 9.783e-01 | 9.629e-01     | 9.940e-01     | 6.903e-03      |                  |                   |                   | 5.681e-03    | 6.494e-03         |                  |

**Cohort: Validation**  
**Outcome: Transplant Free Survival**  
**Predictor: Baseline (4-month) DLco % Predicted**

|                           | Patients<br>(N) | Events<br>(n) | Events<br>(%) | HR        | HR<br>95% LCL | HR<br>95% UCL | Wald<br>pvalue | Median<br>(yrs.) | Median<br>95% LCL | Median<br>95% UCL | LR<br>pvalue | Logrank<br>pvalue | DevLIN<br>pvalue |
|---------------------------|-----------------|---------------|---------------|-----------|---------------|---------------|----------------|------------------|-------------------|-------------------|--------------|-------------------|------------------|
| <b>Quintiles</b>          |                 |               |               |           |               |               |                |                  |                   |                   |              |                   |                  |
| < 30.1                    | 17              | 16            | 94.12         | ----      | ----          | ----          | ----           | 0.44             | 3.068e-01         | 1.128             | 1.93e-05     | 1.04e-06          | 5.04e-01         |
| [ 30.1,38.8)              | 16              | 13            | 81.25         | 4.673e-01 | 2.216e-01     | 9.851e-01     | 4.557e-02      | 1.14             | 6.515e-01         |                   |              |                   |                  |
| [ 38.8,46)                | 16              | 9             | 56.25         | 2.067e-01 | 8.725e-02     | 4.898e-01     | 3.409e-04      | 1.91             | 9.363e-01         |                   |              |                   |                  |
| [ 46,62.2)                | 17              | 8             | 47.06         | 1.798e-01 | 7.490e-02     | 4.316e-01     | 1.225e-04      | 2.40             | 2.199             |                   |              |                   |                  |
| ≥ 62.2                    | 17              | 4             | 23.53         | 1.020e-01 | 3.309e-02     | 3.142e-01     | 6.994e-05      | 5.13             | 1.552             |                   |              |                   |                  |
| <b>Quartiles</b>          |                 |               |               |           |               |               |                |                  |                   |                   |              |                   |                  |
| < 31.7                    | 21              | 19            | 90.48         | ----      | ----          | ----          | ----           | 0.59             | 3.068e-01         | 1.927             | 1.66e-05     | 8.70e-06          | 9.95e-02         |
| [ 31.7,43.7)              | 20              | 15            | 75.00         | 7.852e-01 | 3.958e-01     | 1.558         | 4.891e-01      | 1.01             | 5.285e-01         | 3.565             |              |                   |                  |
| [ 43.7,56.5)              | 21              | 9             | 42.86         | 2.083e-01 | 9.128e-02     | 4.752e-01     | 1.933e-04      | 2.89             | 2.199             |                   |              |                   |                  |
| ≥ 56.5                    | 21              | 7             | 33.33         | 1.828e-01 | 7.318e-02     | 4.566e-01     | 2.740e-04      | 4.30             | 1.933             |                   |              |                   |                  |
| <b>Tertiles</b>           |                 |               |               |           |               |               |                |                  |                   |                   |              |                   |                  |
| < 34.6                    | 28              | 25            | 89.29         | ----      | ----          | ----          | ----           | 0.65             | 3.231e-01         | 1.180             | 2.18e-05     | 8.30e-06          | 6.71e-01         |
| [ 34.6,47.8)              | 27              | 17            | 62.96         | 3.815e-01 | 2.020e-01     | 7.204e-01     | 2.968e-03      | 1.93             | 9.363e-01         |                   |              |                   |                  |
| ≥ 47.8                    | 28              | 8             | 28.57         | 1.763e-01 | 7.777e-02     | 3.996e-01     | 3.225e-05      | 4.30             | 1.933             |                   |              |                   |                  |
| <b>Profile Likelihood</b> |                 |               |               |           |               |               |                |                  |                   |                   |              |                   |                  |
| < 41.7                    | 39              | 33            | 84.62         | ----      | ----          | ----          | ----           | 0.67             | 5.258e-01         | 1.136             | 4.66e-07     | 1.97e-07          | 5.58e-02         |
| ≥ 41.7                    | 44              | 17            | 38.64         | 2.157e-01 | 1.146e-01     | 4.058e-01     | 1.968e-06      | 2.89             | 1.933             |                   |              |                   |                  |
| <b>Quantitative</b>       |                 |               |               |           |               |               |                |                  |                   |                   |              |                   |                  |
|                           | 83              | 50            | 60.24         | 9.540e-01 | 9.342e-01     | 9.743e-01     | 1.146e-05      |                  |                   |                   | 6.892e-07    | 8.256e-06         |                  |

**Cohort: Validation**  
**Outcome: Transplant Free Survival**  
**Predictor: Baseline (4-month) CPI**

|                           | Patients<br>(N) | Events<br>(n) | Events<br>(%) | HR    | HR<br>95% LCL | HR<br>95% UCL | Wald<br>pvalue | Median<br>(yrs.) | Median<br>95% LCL | Median<br>95% UCL | LR<br>pvalue | Logrank<br>pvalue | DevLIN<br>pvalue |
|---------------------------|-----------------|---------------|---------------|-------|---------------|---------------|----------------|------------------|-------------------|-------------------|--------------|-------------------|------------------|
| <b>Quintiles</b>          |                 |               |               |       |               |               |                |                  |                   |                   |              |                   |                  |
| < 41.2                    | 17              | 4             | 23.53         | ----  | ----          | ----          | ----           | 5.13             | 1.933             |                   | 1.33e-03     | 9.37e-04          | 5.49e-01         |
| [ 41.2,50.9)              | 16              | 8             | 50.00         | 2.181 | 6.513e-01     | 7.306         | 2.060e-01      | 2.20             | 1.552             |                   |              |                   |                  |
| [ 50.9,59.1)              | 17              | 11            | 64.71         | 2.806 | 8.907e-01     | 8.841         | 7.802e-02      | 1.93             | 6.652e-01         |                   |              |                   |                  |
| [ 59.1,65.3)              | 16              | 13            | 81.25         | 4.667 | 1.492         | 1.460e+01     | 8.095e-03      | 0.94             | 5.940e-01         |                   |              |                   |                  |
| ≥ 65.3                    | 17              | 14            | 82.35         | 7.294 | 2.357         | 2.257e+01     | 5.647e-04      | 0.47             | 3.068e-01         |                   |              |                   |                  |
| <b>Quartiles</b>          |                 |               |               |       |               |               |                |                  |                   |                   |              |                   |                  |
| < 44.4                    | 21              | 5             | 23.81         | ----  | ----          | ----          | ----           | 5.13             | 1.933             |                   | 5.24e-05     | 5.69e-05          | 4.31e-01         |
| [ 44.4,55.5)              | 20              | 10            | 50.00         | 1.618 | 5.468e-01     | 4.791         | 3.845e-01      | 2.40             | 1.552             |                   |              |                   |                  |
| [ 55.5,64.1)              | 21              | 17            | 80.95         | 5.072 | 1.826         | 1.409e+01     | 1.837e-03      | 1.14             | 6.515e-01         | 2.371             |              |                   |                  |
| ≥ 64.1                    | 21              | 18            | 85.71         | 6.142 | 2.217         | 1.701e+01     | 4.790e-04      | 0.59             | 3.068e-01         |                   |              |                   |                  |
| <b>Tertiles</b>           |                 |               |               |       |               |               |                |                  |                   |                   |              |                   |                  |
| < 49.9                    | 28              | 10            | 35.71         | ----  | ----          | ----          | ----           | 2.40             | 1.933             |                   | 5.13e-04     | 2.63e-04          | 2.79e-01         |
| [ 49.9,60.6)              | 27              | 16            | 59.26         | 1.708 | 7.730e-01     | 3.772         | 1.857e-01      | 1.93             | 1.136             |                   |              |                   |                  |
| ≥ 60.6                    | 28              | 24            | 85.71         | 4.036 | 1.889         | 8.621         | 3.145e-04      | 0.65             | 4.353e-01         | 1.180             |              |                   |                  |
| <b>Profile Likelihood</b> |                 |               |               |       |               |               |                |                  |                   |                   |              |                   |                  |
| <56.0                     | 42              | 15            | 35.71         | ----  | ----          | ----          | ----           | 4.09             | 2.199             |                   | 9.90e-07     | 8.36e-07          | 8.01e-02         |
| ≥56.0                     | 41              | 35            | 85.37         | 4.560 | 2.356         | 8.826         | 6.678e-06      | 0.94             | 5.285e-01         | 1.185             |              |                   |                  |
| <b>Quantitative</b>       | 83              | 50            | 60.24         | 1.062 | 1.033         | 1.092         | 1.752e-05      |                  |                   |                   | 1.472e-06    | 1.100e-05         |                  |



**Cohort: Validation**  
**Outcome: Transplant Free Survival**  
**Predictor: Baseline (3-month) FVC % Predicted**

|                           | Patients<br>(N) | Events<br>(n) | Events<br>(%) | HR        | HR<br>95% LCL | HR<br>95% UCL | Wald<br>pvalue | Median<br>(yrs.) | Median<br>95% LCL | Median<br>95% UCL | LR<br>pvalue | Logrank<br>pvalue | DevLIN<br>pvalue |
|---------------------------|-----------------|---------------|---------------|-----------|---------------|---------------|----------------|------------------|-------------------|-------------------|--------------|-------------------|------------------|
| <b>Quintiles</b>          |                 |               |               |           |               |               |                |                  |                   |                   |              |                   |                  |
| < 48.9                    | 15              | 11            | 73.33         | ----      | ----          | ----          | ----           | 0.99             | 5.258e-01         |                   | 8.09e-02     | 9.23e-02          | 9.20e-01         |
| [ 48.9,55.7)              | 15              | 11            | 73.33         | 8.253e-01 | 3.517e-01     | 1.937         | 6.590e-01      | 1.15             | 4.764e-01         |                   |              |                   |                  |
| [ 55.7,62)                | 13              | 9             | 69.23         | 8.333e-01 | 3.385e-01     | 2.051         | 6.916e-01      | 0.94             | 4.710e-01         |                   |              |                   |                  |
| [ 62,76.7)                | 17              | 8             | 47.06         | 4.455e-01 | 1.753e-01     | 1.132         | 8.930e-02      | 1.93             | 1.511             |                   |              |                   |                  |
| ≥ 76.7                    | 15              | 6             | 40.00         | 2.983e-01 | 1.083e-01     | 8.215e-01     | 1.926e-02      | 2.40             | 2.199             |                   |              |                   |                  |
| <b>Quartiles</b>          |                 |               |               |           |               |               |                |                  |                   |                   |              |                   |                  |
| < 49.7                    | 19              | 13            | 68.42         | ----      | ----          | ----          | ----           | 1.01             | 5.940e-01         |                   | 1.36e-01     | 1.38e-01          | 4.16e-01         |
| [ 49.7,58.8)              | 18              | 14            | 77.78         | 1.138     | 5.226e-01     | 2.480         | 7.441e-01      | 0.85             | 4.710e-01         |                   |              |                   |                  |
| [ 58.8,73.3)              | 19              | 9             | 47.37         | 6.217e-01 | 2.614e-01     | 1.479         | 2.822e-01      | 1.55             | 6.515e-01         |                   |              |                   |                  |
| ≥ 73.3                    | 19              | 9             | 47.37         | 4.661e-01 | 1.970e-01     | 1.103         | 8.240e-02      | 2.20             | 1.927             |                   |              |                   |                  |
| <b>Tertiles</b>           |                 |               |               |           |               |               |                |                  |                   |                   |              |                   |                  |
| < 51.8                    | 25              | 19            | 76.00         | ----      | ----          | ----          | ----           | 0.99             | 5.940e-01         |                   | 4.76e-03     | 6.93e-03          | 2.01e-01         |
| [ 51.8,68.1)              | 25              | 16            | 64.00         | 8.292e-01 | 4.194e-01     | 1.640         | 5.903e-01      | 1.19             | 5.285e-01         |                   |              |                   |                  |
| ≥ 68.1                    | 25              | 10            | 40.00         | 3.002e-01 | 1.342e-01     | 6.714e-01     | 3.392e-03      | 2.40             | 1.933             |                   |              |                   |                  |
| <b>Profile Likelihood</b> |                 |               |               |           |               |               |                |                  |                   |                   |              |                   |                  |
| < 62.3                    | 46              | 33            | 71.74         | ----      | ----          | ----          | ----           | 0.99             | 5.940e-01         | 2.888             | 1.01e-03     | 1.34e-03          | 6.91e-02         |
| ≥ 62.3                    | 29              | 12            | 41.38         | 3.390e-01 | 1.698e-01     | 6.765e-01     | 2.152e-03      | 2.40             | 1.930             |                   |              |                   |                  |
| <b>Quantitative</b>       |                 |               |               |           |               |               |                |                  |                   |                   |              |                   |                  |
|                           | 75              | 45            | 60.00         | 9.766e-01 | 9.599e-01     | 9.935e-01     | 6.985e-03      |                  |                   |                   | 6.142e-03    | 6.560e-03         |                  |

**Cohort: Validation**  
**Outcome: Transplant Free Survival**  
**Predictor: Baseline (3-month) DLco % Predicted**

|                           | Patients<br>(N) | Events<br>(n) | Events<br>(%) | HR        | HR<br>95% LCL | HR<br>95% UCL | Wald<br>pvalue | Median<br>(yrs.) | Median<br>95% LCL | Median<br>95% UCL | LR<br>pvalue | Logrank<br>pvalue | DevLIN<br>pvalue |
|---------------------------|-----------------|---------------|---------------|-----------|---------------|---------------|----------------|------------------|-------------------|-------------------|--------------|-------------------|------------------|
| <b>Quintiles</b>          |                 |               |               |           |               |               |                |                  |                   |                   |              |                   |                  |
| < 28.6                    | 14              | 13            | 92.86         | ----      | ----          | ----          | ----           | 0.37             | 2.847e-01         |                   | 1.26e-05     | 8.70e-07          | 2.99e-01         |
| [ 28.6,38.3)              | 14              | 11            | 78.57         | 5.956e-01 | 2.635e-01     | 1.347         | 2.132e-01      | 0.77             | 5.940e-01         |                   |              |                   |                  |
| [ 38.3,46)                | 13              | 6             | 46.15         | 1.428e-01 | 5.054e-02     | 4.035e-01     | 2.399e-04      | 4.09             | 1.563             |                   |              |                   |                  |
| [ 46,61.3)                | 15              | 7             | 46.67         | 1.747e-01 | 6.713e-02     | 4.545e-01     | 3.482e-04      | 2.89             | 2.199             |                   |              |                   |                  |
| ≥ 61.3                    | 14              | 3             | 21.43         | 8.222e-02 | 2.224e-02     | 3.040e-01     | 1.804e-04      | 5.13             |                   |                   |              |                   |                  |
| <b>Quartiles</b>          |                 |               |               |           |               |               |                |                  |                   |                   |              |                   |                  |
| < 30.9                    | 18              | 16            | 88.89         | ----      | ----          | ----          | ----           | 0.53             | 3.068e-01         | 1.927             | 2.03e-04     | 5.27e-05          | 6.99e-01         |
| [ 30.9,43.8)              | 17              | 11            | 64.71         | 4.576e-01 | 2.056e-01     | 1.018         | 5.538e-02      | 1.01             | 5.285e-01         |                   |              |                   |                  |
| [ 43.8,55.1)              | 17              | 8             | 47.06         | 2.484e-01 | 1.045e-01     | 5.904e-01     | 1.616e-03      | 2.89             | 2.199             |                   |              |                   |                  |
| ≥ 55.1                    | 18              | 5             | 27.78         | 1.383e-01 | 4.925e-02     | 3.886e-01     | 1.743e-04      | 4.30             | 1.933             |                   |              |                   |                  |
| <b>Tertiles</b>           |                 |               |               |           |               |               |                |                  |                   |                   |              |                   |                  |
| < 33.8                    | 23              | 20            | 86.96         | ----      | ----          | ----          | ----           | 0.65             | 3.068e-01         | 1.927             | 3.50e-05     | 1.06e-05          | 7.68e-01         |
| [ 33.8,47.4)              | 24              | 14            | 58.33         | 3.367e-01 | 1.651e-01     | 6.867e-01     | 2.756e-03      | 1.93             | 1.185             |                   |              |                   |                  |
| ≥ 47.4                    | 23              | 6             | 26.09         | 1.447e-01 | 5.627e-02     | 3.721e-01     | 6.043e-05      | 4.30             | 2.404             |                   |              |                   |                  |
| <b>Profile Likelihood</b> |                 |               |               |           |               |               |                |                  |                   |                   |              |                   |                  |
| < 39.5                    | 29              | 25            | 86.21         | ----      | ----          | ----          | ----           | 0.65             | 4.600e-01         | 1.180             | 1.75e-07     | 1.90e-08          | 2.18e-02         |
| ≥ 39.5                    | 41              | 15            | 36.59         | 1.654e-01 | 8.183e-02     | 3.343e-01     | 5.402e-07      | 2.89             | 2.199             |                   |              |                   |                  |
| <b>Quantitative</b>       | 70              | 40            | 57.14         | 9.496e-01 | 9.273e-01     | 9.723e-01     | 1.870e-05      |                  |                   |                   | 1.098e-06    | 1.355e-05         |                  |

**Cohort: Validation**  
**Outcome: Transplant Free Survival**  
**Predictor: Baseline (3-month) CPI**

|                           | Patients<br>(N) | Events<br>(n) | Events<br>(%) | HR    | HR<br>95% LCL | HR<br>95% UCL | Wald<br>pvalue | Median<br>(yrs.) | Median<br>95% LCL | Median<br>95% UCL | LR<br>pvalue | Logrank<br>pvalue | DevLIN<br>pvalue |
|---------------------------|-----------------|---------------|---------------|-------|---------------|---------------|----------------|------------------|-------------------|-------------------|--------------|-------------------|------------------|
| <b>Quintiles</b>          |                 |               |               |       |               |               |                |                  |                   |                   |              |                   |                  |
| < 42.9                    | 14              | 3             | 21.43         | ----  | ----          | ----          | ----           | 5.13             | 1.933             |                   | 3.18e-04     | 1.46e-04          | 6.09e-02         |
| [ 42.9,51.7)              | 14              | 7             | 50.00         | 2.452 | 6.215e-01     | 9.676         | 2.002e-01      | 2.40             | 1.914             |                   |              |                   |                  |
| [ 51.7,59.8)              | 14              | 7             | 50.00         | 2.044 | 5.266e-01     | 7.933         | 3.015e-01      | 2.89             | 1.927             |                   |              |                   |                  |
| [ 59.8,66)                | 14              | 12            | 85.71         | 8.211 | 2.224         | 3.031e+01     | 1.578e-03      | 0.71             | 5.258e-01         |                   |              |                   |                  |
| ≥ 66                      | 14              | 11            | 78.57         | 8.051 | 2.165         | 2.995e+01     | 1.857e-03      | 0.73             | 3.068e-01         |                   |              |                   |                  |
| <b>Quartiles</b>          |                 |               |               |       |               |               |                |                  |                   |                   |              |                   |                  |
| < 45.4                    | 18              | 5             | 27.78         | ----  | ----          | ----          | ----           | 2.40             | 2.199             |                   | 5.25e-06     | 2.27e-06          | 1.26e-01         |
| [ 45.4,56)                | 17              | 6             | 35.29         | 1.021 | 3.054e-01     | 3.411         | 9.735e-01      | 4.09             | 1.914             |                   |              |                   |                  |
| [ 56,64.8)                | 17              | 14            | 82.35         | 5.191 | 1.784         | 1.511e+01     | 2.515e-03      | 0.94             | 6.515e-01         |                   |              |                   |                  |
| ≥ 64.8                    | 18              | 15            | 83.33         | 7.894 | 2.722         | 2.289e+01     | 1.426e-04      | 0.53             | 3.068e-01         |                   |              |                   |                  |
| <b>Tertiles</b>           |                 |               |               |       |               |               |                |                  |                   |                   |              |                   |                  |
| < 50.3                    | 23              | 8             | 34.78         | ----  | ----          | ----          | ----           | 2.40             | 1.933             |                   | 4.69e-05     | 6.23e-06          | 2.40e-01         |
| [ 50.3,62.2)              | 24              | 12            | 50.00         | 1.547 | 6.298e-01     | 3.800         | 3.413e-01      | 1.93             | 1.563             |                   |              |                   |                  |
| ≥ 62.2                    | 23              | 20            | 86.96         | 5.700 | 2.418         | 1.344e+01     | 6.951e-05      | 0.59             | 3.068e-01         | 1.180             |              |                   |                  |
| <b>Profile Likelihood</b> |                 |               |               |       |               |               |                |                  |                   |                   |              |                   |                  |
| <56.0                     | 35              | 11            | 31.43         | ----  | ----          | ----          | ----           | 4.09             | 2.404             |                   | 3.40e-07     | 2.66e-07          | 3.47e-02         |
| ≥56.0                     | 35              | 29            | 82.86         | 6.243 | 2.830         | 1.377e+01     | 5.693e-06      | 0.94             | 5.258e-01         | 1.563             |              |                   |                  |
| <b>Quantitative</b>       | 70              | 40            | 57.14         | 1.071 | 1.038         | 1.106         | 2.394e-05      |                  |                   |                   | 1.442e-06    | 1.435e-05         |                  |

**Cohort: Validation**  
**Outcome: Transplant Free Survival**  
**Predictor: MMP7Elisa ( ng / mL )**

|                           | Patients<br>(N) | Events<br>(n) | Events<br>(%) | HR    | HR<br>95% LCL | HR<br>95% UCL | Wald<br>pvalue | Median<br>(yrs.) | Median<br>95% LCL | Median<br>95% UCL | LR<br>pvalue | Logrank<br>pvalue | DevLIN<br>pvalue |
|---------------------------|-----------------|---------------|---------------|-------|---------------|---------------|----------------|------------------|-------------------|-------------------|--------------|-------------------|------------------|
| <b>Quintiles</b>          |                 |               |               |       |               |               |                |                  |                   |                   |              |                   |                  |
| < 3.41                    | 20              | 8             | 40.00         | ----  | ----          | ----          | ----           | 4.30             | 9.363e-01         |                   | 2.05e-01     | 2.14e-01          | 5.43e-01         |
| [ 3.41,4.56)              | 20              | 12            | 60.00         | 1.776 | 7.117e-01     | 4.434         | 2.182e-01      | 1.56             | 1.128             |                   |              |                   |                  |
| [ 4.56,5.49)              | 20              | 13            | 65.00         | 1.399 | 5.775e-01     | 3.390         | 4.569e-01      | 2.20             | 5.258e-01         |                   |              |                   |                  |
| [ 5.49,7.52)              | 20              | 13            | 65.00         | 2.161 | 8.755e-01     | 5.333         | 9.463e-02      | 1.01             | 4.764e-01         |                   |              |                   |                  |
| ≥ 7.52                    | 21              | 17            | 80.95         | 2.566 | 1.084         | 6.078         | 3.216e-02      | 1.18             | 6.515e-01         | 2.404             |              |                   |                  |
| <b>Quartiles</b>          |                 |               |               |       |               |               |                |                  |                   |                   |              |                   |                  |
| < 3.54                    | 25              | 10            | 40.00         | ----  | ----          | ----          | ----           | 4.30             | 1.511             |                   | 3.79e-02     | 3.94e-02          | 1.14e-01         |
| [ 3.54,4.94)              | 25              | 15            | 60.00         | 2.008 | 8.958e-01     | 4.502         | 9.048e-02      | 1.91             | 6.845e-01         |                   |              |                   |                  |
| [ 4.94,6.46)              | 25              | 17            | 68.00         | 1.765 | 8.056e-01     | 3.865         | 1.557e-01      | 1.93             | 5.258e-01         |                   |              |                   |                  |
| ≥ 6.46                    | 26              | 21            | 80.77         | 2.949 | 1.369         | 6.350         | 5.730e-03      | 1.18             | 6.515e-01         | 2.371             |              |                   |                  |
| <b>Tertiles</b>           |                 |               |               |       |               |               |                |                  |                   |                   |              |                   |                  |
| < 3.99                    | 34              | 15            | 44.12         | ----  | ----          | ----          | ----           | 2.34             | 1.136             |                   | 2.87e-02     | 2.55e-02          | 1.09e-01         |
| [ 3.99,5.91)              | 33              | 22            | 66.67         | 1.437 | 7.430e-01     | 2.778         | 2.816e-01      | 1.93             | 6.790e-01         | 4.087             |              |                   |                  |
| ≥ 5.91                    | 34              | 26            | 76.47         | 2.344 | 1.228         | 4.474         | 9.774e-03      | 1.18             | 5.285e-01         | 2.371             |              |                   |                  |
| <b>Profile Likelihood</b> |                 |               |               |       |               |               |                |                  |                   |                   |              |                   |                  |
| < 3.5                     | 24              | 9             | 37.50         | ----  | ----          | ----          | ----           | 4.30             | 1.563             |                   | 1.00e-02     | 1.58e-02          | 4.01e-02         |
| ≥ 3.5                     | 77              | 54            | 70.13         | 2.337 | 1.149         | 4.756         | 1.917e-02      | 1.19             | 8.350e-01         | 2.045             |              |                   |                  |
| <b>Quantitative</b>       |                 |               |               |       |               |               |                |                  |                   |                   |              |                   |                  |
|                           | 101             | 63            | 62.38         | 1.058 | 9.950e-01     | 1.125         | 7.161e-02      |                  |                   |                   | 9.255e-02    | 6.968e-02         |                  |

**Cohort: Validation**  
**Outcome: Transplant Free Survival**  
**Predictor: ICAM ( ng / mL )**

|                           | Patients<br>(N) | Events<br>(n) | Events<br>(%) | HR        | HR<br>95% LCL | HR<br>95% UCL | Wald<br>pvalue | Median<br>(yrs.) | Median<br>95% LCL | Median<br>95% UCL | LR<br>pvalue | Logrank<br>pvalue | DevLIN<br>pvalue |
|---------------------------|-----------------|---------------|---------------|-----------|---------------|---------------|----------------|------------------|-------------------|-------------------|--------------|-------------------|------------------|
| <b>Quintiles</b>          |                 |               |               |           |               |               |                |                  |                   |                   |              |                   |                  |
| < 226                     | 20              | 8             | 40.00         | ----      | ----          | ----          | ----           | 5.13             | 1.008             |                   | 6.28e-03     | 5.68e-03          | 7.64e-02         |
| [ 226,281)                | 20              | 11            | 55.00         | 9.929e-01 | 3.967e-01     | 2.485         | 9.879e-01      | 2.89             | 1.180             |                   |              |                   |                  |
| [ 281,326)                | 20              | 11            | 55.00         | 2.241     | 8.736e-01     | 5.750         | 9.316e-02      | 1.91             | 6.845e-01         |                   |              |                   |                  |
| [ 326,419)                | 20              | 16            | 80.00         | 3.669     | 1.520         | 8.855         | 3.827e-03      | 0.67             | 5.202e-01         |                   |              |                   |                  |
| ≥ 419                     | 21              | 17            | 80.95         | 2.482     | 1.044         | 5.899         | 3.959e-02      | 1.19             | 6.790e-01         |                   |              |                   |                  |
| <b>Quartiles</b>          |                 |               |               |           |               |               |                |                  |                   |                   |              |                   |                  |
| < 238                     | 25              | 11            | 44.00         | ----      | ----          | ----          | ----           | 4.09             | 1.008             |                   | 8.39e-04     | 7.76e-04          | 2.29e-02         |
| [ 238,303)                | 25              | 11            | 44.00         | 9.075e-01 | 3.908e-01     | 2.107         | 8.213e-01      | 2.89             | 1.914             |                   |              |                   |                  |
| [ 303,387)                | 25              | 20            | 80.00         | 3.200     | 1.490         | 6.873         | 2.858e-03      | 0.68             | 5.258e-01         | 2.045             |              |                   |                  |
| ≥ 387                     | 26              | 21            | 80.77         | 2.576     | 1.215         | 5.459         | 1.357e-02      | 1.19             | 5.940e-01         | 2.371             |              |                   |                  |
| <b>Tertiles</b>           |                 |               |               |           |               |               |                |                  |                   |                   |              |                   |                  |
| < 258                     | 34              | 14            | 41.18         | ----      | ----          | ----          | ----           | 2.89             | 2.199             |                   | 1.65e-03     | 2.00e-03          | 1.48e-01         |
| [ 258,367)                | 33              | 20            | 60.61         | 2.123     | 1.053         | 4.279         | 3.525e-02      | 1.91             | 8.543e-01         |                   |              |                   |                  |
| ≥ 367                     | 34              | 29            | 85.29         | 3.162     | 1.622         | 6.163         | 7.223e-04      | 0.79             | 5.940e-01         | 1.933             |              |                   |                  |
| <b>Profile Likelihood</b> |                 |               |               |           |               |               |                |                  |                   |                   |              |                   |                  |
| <300.0                    | 50              | 22            | 44.00         | ----      | ----          | ----          | ----           | 4.09             | 1.914             |                   | 5.97e-05     | 6.09e-05          | 7.29e-03         |
| ≥300.0                    | 51              | 41            | 80.39         | 2.978     | 1.702         | 5.212         | 1.325e-04      | 0.85             | 6.515e-01         | 1.927             |              |                   |                  |
| <b>Quantitative</b>       | 101             | 63            | 62.38         | 1.003     | 1.001         | 1.006         | 2.261e-03      |                  |                   |                   | 2.672e-03    | 1.994e-03         |                  |

**Cohort: Validation**  
**Outcome: Transplant Free Survival**  
**Predictor: IL8 ( ng / mL )**

|                           | Patients<br>(N) | Events<br>(n) | Events<br>(%) | HR    | HR<br>95% LCL | HR<br>95% UCL | Wald<br>pvalue | Median<br>(yrs.) | Median<br>95% LCL | Median<br>95% UCL | LR<br>pvalue | Logrank<br>pvalue | DevLIN<br>pvalue |
|---------------------------|-----------------|---------------|---------------|-------|---------------|---------------|----------------|------------------|-------------------|-------------------|--------------|-------------------|------------------|
| <b>Quintiles</b>          |                 |               |               |       |               |               |                |                  |                   |                   |              |                   |                  |
| < 0.00767                 | 20              | 10            | 50.00         | ----  | ----          | ----          | ----           | 4.09             | 1.185             |                   | 2.50e-01     | 2.78e-01          | 5.42e-01         |
| [ 0.00767,0.0101)         | 20              | 12            | 60.00         | 1.976 | 8.118e-01     | 4.811         | 1.334e-01      | 1.93             | 1.322             |                   |              |                   |                  |
| [ 0.0101,0.0131)          | 19              | 11            | 57.89         | 2.283 | 9.841e-01     | 5.297         | 5.452e-02      | 0.68             | 5.532e-01         |                   |              |                   |                  |
| [ 0.0131,0.0178)          | 20              | 15            | 75.00         | 2.275 | 9.576e-01     | 5.405         | 6.263e-02      | 0.85             | 7.995e-01         |                   |              |                   |                  |
| ≥ 0.0178                  | 20              | 14            | 70.00         | 1.540 | 6.334e-01     | 3.747         | 3.407e-01      | 1.14             | 9.363e-01         |                   |              |                   |                  |
| <b>Quartiles</b>          |                 |               |               |       |               |               |                |                  |                   |                   |              |                   |                  |
| < 0.00825                 | 25              | 13            | 52.00         | ----  | ----          | ----          | ----           | 4.05             | 1.185             |                   | 1.78e-01     | 2.08e-01          | 4.23e-01         |
| [ 0.00825,0.0112)         | 24              | 15            | 62.50         | 1.840 | 8.673e-01     | 3.905         | 1.120e-01      | 1.93             | 6.845e-01         |                   |              |                   |                  |
| [ 0.0112,0.0164)          | 25              | 16            | 64.00         | 2.152 | 1.011         | 4.577         | 4.667e-02      | 0.84             | 4.764e-01         |                   |              |                   |                  |
| ≥ 0.0164                  | 25              | 18            | 72.00         | 1.933 | 8.770e-01     | 4.259         | 1.022e-01      | 1.51             | 9.884e-01         | 2.404             |              |                   |                  |
| <b>Tertiles</b>           |                 |               |               |       |               |               |                |                  |                   |                   |              |                   |                  |
| < 0.00959                 | 33              | 16            | 48.48         | ----  | ----          | ----          | ----           | 4.05             | 1.185             |                   | 4.50e-02     | 5.45e-02          | 1.39e-01         |
| [ 0.00959,0.015)          | 33              | 22            | 66.67         | 2.074 | 1.079         | 3.988         | 2.874e-02      | 1.18             | 6.845e-01         |                   |              |                   |                  |
| ≥ 0.015                   | 33              | 24            | 72.73         | 2.000 | 1.029         | 3.886         | 4.099e-02      | 1.14             | 8.543e-01         | 2.404             |              |                   |                  |
| <b>Profile Likelihood</b> |                 |               |               |       |               |               |                |                  |                   |                   |              |                   |                  |
| < 0.0094                  | 31              | 14            | 45.16         | ----  | ----          | ----          | ----           | 4.05             | 1.322             |                   | 3.22e-03     | 4.75e-03          | 1.16e-02         |
| ≥ 0.0094                  | 68              | 48            | 70.59         | 2.388 | 1.282         | 4.448         | 6.081e-03      | 1.14             | 7.995e-01         | 1.930             |              |                   |                  |
| <b>Quantitative*</b>      | 99              | 62            | 62.63         | 1.021 | 9.974e-01     | 1.046         | 8.170e-02      |                  |                   |                   | 1.282e-01    | 8.466e-02         |                  |

\*Units of pg / mL were used in **Quantitative model only**.

**Cohort: Validation**  
**Outcome: Transplant Free Survival**  
**Predictor: VCAM ( ng / mL )**

|                           | Patients<br>(N) | Events<br>(n) | Events<br>(%) | HR        | HR<br>95% LCL | HR<br>95% UCL | Wald<br>pvalue | Median<br>(yrs.) | Median<br>95% LCL | Median<br>95% UCL | LR<br>pvalue | Logrank<br>pvalue | DevLIN<br>pvalue |
|---------------------------|-----------------|---------------|---------------|-----------|---------------|---------------|----------------|------------------|-------------------|-------------------|--------------|-------------------|------------------|
| <b>Quintiles</b>          |                 |               |               |           |               |               |                |                  |                   |                   |              |                   |                  |
| < 222                     | 20              | 13            | 65.00         | ----      | ----          | ----          | ----           | 1.01             | 7.695e-01         |                   | 1.61e-01     | 1.57e-01          | 1.14e-01         |
| [ 222,260)                | 20              | 14            | 70.00         | 1.219     | 5.669e-01     | 2.620         | 6.124e-01      | 0.85             | 6.845e-01         |                   |              |                   |                  |
| [ 260,310)                | 20              | 9             | 45.00         | 5.995e-01 | 2.538e-01     | 1.416         | 2.432e-01      | 2.37             | 1.322             |                   |              |                   |                  |
| [ 310,376)                | 20              | 12            | 60.00         | 6.943e-01 | 3.158e-01     | 1.527         | 3.641e-01      | 2.05             | 1.511             |                   |              |                   |                  |
| ≥ 376                     | 21              | 15            | 71.43         | 1.468     | 6.868e-01     | 3.136         | 3.221e-01      | 1.56             | 5.940e-01         |                   |              |                   |                  |
| <b>Quartiles</b>          |                 |               |               |           |               |               |                |                  |                   |                   |              |                   |                  |
| < 230                     | 25              | 17            | 68.00         | ----      | ----          | ----          | ----           | 1.01             | 6.515e-01         |                   | 6.24e-01     | 6.22e-01          | 6.42e-01         |
| [ 230,285)                | 25              | 14            | 56.00         | 7.316e-01 | 3.582e-01     | 1.494         | 3.909e-01      | 1.32             | 9.363e-01         |                   |              |                   |                  |
| [ 285,358)                | 25              | 14            | 56.00         | 7.509e-01 | 3.680e-01     | 1.532         | 4.313e-01      | 2.05             | 1.511             |                   |              |                   |                  |
| ≥ 358                     | 26              | 18            | 69.23         | 1.071     | 5.509e-01     | 2.082         | 8.398e-01      | 1.56             | 5.940e-01         | 3.565             |              |                   |                  |
| <b>Tertiles</b>           |                 |               |               |           |               |               |                |                  |                   |                   |              |                   |                  |
| < 246                     | 34              | 24            | 70.59         | ----      | ----          | ----          | ----           | 0.80             | 6.845e-01         |                   | 4.48e-02     | 5.27e-02          | 2.33e-02         |
| [ 246,334)                | 33              | 15            | 45.45         | 4.620e-01 | 2.407e-01     | 8.871e-01     | 2.034e-02      | 2.37             | 1.552             |                   |              |                   |                  |
| ≥ 334                     | 34              | 24            | 70.59         | 8.547e-01 | 4.839e-01     | 1.510         | 5.887e-01      | 1.56             | 6.790e-01         | 3.565             |              |                   |                  |
| <b>Profile Likelihood</b> |                 |               |               |           |               |               |                |                  |                   |                   |              |                   |                  |
| <358.2                    | 77              | 46            | 59.74         | ----      | ----          | ----          | ----           | 1.93             | 1.128             | 3.975             | 3.57e-02     | 2.51e-02          | 1.60e-02         |
| ≥358.2                    | 24              | 17            | 70.83         | 1.905     | 1.073         | 3.382         | 2.786e-02      | 1.14             | 5.202e-01         |                   |              |                   |                  |
| <b>Quantitative</b>       | 101             | 63            | 62.38         | 1.001     | 0.9985        | 1.003         | 5.206e-01      |                  |                   |                   | 5.287e-01    | 5.208e-01         |                  |

**Cohort: Validation**  
**Outcome: Transplant Free Survival**  
**Predictor: S100A12 ( ng / mL )**

|                           | Patients<br>(N) | Events<br>(n) | Events<br>(%) | HR        | HR<br>95% LCL | HR<br>95% UCL | Wald<br>pvalue | Median<br>(yrs.) | Median<br>95% LCL | Median<br>95% UCL | LR<br>pvalue | Logrank<br>pvalue | DevLIN<br>pvalue |
|---------------------------|-----------------|---------------|---------------|-----------|---------------|---------------|----------------|------------------|-------------------|-------------------|--------------|-------------------|------------------|
| <b>Quintiles</b>          |                 |               |               |           |               |               |                |                  |                   |                   |              |                   |                  |
| < 36.6                    | 20              | 10            | 50.00         | ----      | ----          | ----          | ----           | 1.93             | 1.322             |                   | 1.76e-01     | 1.28e-01          | 2.01e-01         |
| [ 36.6,49.2)              | 20              | 9             | 45.00         | 1.187     | 5.269e-01     | 2.675         | 6.787e-01      | 2.40             | 2.045             |                   |              |                   |                  |
| [ 49.2,65.9)              | 20              | 11            | 55.00         | 8.325e-01 | 3.364e-01     | 2.060         | 6.918e-01      | 2.20             | 8.350e-01         |                   |              |                   |                  |
| [ 65.9,105)               | 20              | 17            | 85.00         | 1.076     | 4.544e-01     | 2.546         | 8.682e-01      | 0.80             | 4.519e-01         | 1.914             |              |                   |                  |
| ≥ 105                     | 21              | 16            | 76.19         | 2.112     | 9.624e-01     | 4.634         | 6.227e-02      | 1.19             | 4.710e-01         |                   |              |                   |                  |
| <b>Quartiles</b>          |                 |               |               |           |               |               |                |                  |                   |                   |              |                   |                  |
| < 39.7                    | 25              | 13            | 52.00         | ----      | ----          | ----          | ----           | 1.93             | 1.322             |                   | 6.82e-01     | 6.84e-01          | 8.10e-01         |
| [ 39.7,54.5)              | 25              | 13            | 52.00         | 1.055     | 4.871e-01     | 2.287         | 8.911e-01      | 2.34             | 9.363e-01         |                   |              |                   |                  |
| [ 54.5,82.8)              | 25              | 17            | 68.00         | 1.455     | 7.033e-01     | 3.010         | 3.120e-01      | 1.13             | 5.285e-01         |                   |              |                   |                  |
| ≥ 82.8                    | 26              | 20            | 76.92         | 1.358     | 6.661e-01     | 2.770         | 3.997e-01      | 1.01             | 5.940e-01         | 4.087             |              |                   |                  |
| <b>Tertiles</b>           |                 |               |               |           |               |               |                |                  |                   |                   |              |                   |                  |
| < 43.9                    | 34              | 16            | 47.06         | ----      | ----          | ----          | ----           | 2.05             | 1.563             |                   | 9.76e-02     | 8.95e-02          | 2.57e-02         |
| [ 43.9,72.3)              | 33              | 19            | 57.58         | 1.228     | 6.296e-01     | 2.395         | 5.468e-01      | 2.20             | 9.363e-01         |                   |              |                   |                  |
| ≥ 72.3                    | 34              | 28            | 82.35         | 1.920     | 1.029         | 3.582         | 4.035e-02      | 0.80             | 4.519e-01         | 1.552             |              |                   |                  |
| <b>Profile Likelihood</b> |                 |               |               |           |               |               |                |                  |                   |                   |              |                   |                  |
| < 72.1                    | 67              | 35            | 52.24         | ----      | ----          | ----          | ----           | 2.20             | 1.914             | 3.565             | 3.84e-02     | 3.33e-02          | 1.33e-02         |
| ≥ 72.1                    | 34              | 28            | 82.35         | 1.727     | 1.039         | 2.871         | 3.511e-02      | 0.80             | 4.519e-01         | 1.552             |              |                   |                  |
| <b>Quantitative</b>       | 101             | 63            | 62.38         | 1.002     | 0.9973        | 1.006         | 4.431e-01      |                  |                   |                   | 4.550e-01    | 4.427e-01         |                  |



**Cohort: Validation**

**Outcome: Progression Free Survival by FVC ( Lung Transplant is Censored )**

**Predictor: Age (years)**

|                           | Patients<br>(N) | Events<br>(n) | Events<br>(%) | HR        | HR<br>95% LCL | HR<br>95% UCL | Wald<br>pvalue | Median<br>(yrs.) | Median<br>95% LCL | Median<br>95% UCL | LR<br>pvalue | Logrank<br>pvalue | DevLIN<br>pvalue |
|---------------------------|-----------------|---------------|---------------|-----------|---------------|---------------|----------------|------------------|-------------------|-------------------|--------------|-------------------|------------------|
| <b>Quintiles</b>          |                 |               |               |           |               |               |                |                  |                   |                   |              |                   |                  |
| < 61.6                    | 19              | 11            | 57.89         | ----      | ----          | ----          | ----           | 1.22             | 7.661e-01         |                   | 6.76e-02     | 4.07e-02          | 2.77e-02         |
| [ 61.6,66.5)              | 20              | 13            | 65.00         | 2.858     | 1.240         | 6.589         | 1.374e-02      | 0.60             | 4.950e-01         |                   |              |                   |                  |
| [ 66.5,70.1)              | 20              | 11            | 55.00         | 9.496e-01 | 4.113e-01     | 2.192         | 9.036e-01      | 2.04             | 8.620e-01         |                   |              |                   |                  |
| [ 70.1,77.1)              | 20              | 13            | 65.00         | 1.222     | 5.405e-01     | 2.765         | 6.295e-01      | 1.13             | 7.990e-01         |                   |              |                   |                  |
| ≥ 77.1                    | 20              | 15            | 75.00         | 1.744     | 7.903e-01     | 3.847         | 1.685e-01      | 0.85             | 7.251e-01         |                   |              |                   |                  |
| <b>Quartiles</b>          |                 |               |               |           |               |               |                |                  |                   |                   |              |                   |                  |
| < 62.8                    | 24              | 14            | 58.33         | ----      | ----          | ----          | ----           | 1.05             | 7.660e-01         |                   | 3.88e-01     | 3.54e-01          | 3.87e-01         |
| [ 62.8,68.4)              | 25              | 16            | 64.00         | 1.688     | 8.091e-01     | 3.523         | 1.628e-01      | 0.86             | 6.046e-01         |                   |              |                   |                  |
| [ 68.4,75)                | 25              | 15            | 60.00         | 9.202e-01 | 4.435e-01     | 1.909         | 8.232e-01      | 1.13             | 9.879e-01         |                   |              |                   |                  |
| ≥ 75                      | 25              | 18            | 72.00         | 1.165     | 5.750e-01     | 2.360         | 6.718e-01      | 1.51             | 7.934e-01         |                   |              |                   |                  |
| <b>Tertiles</b>           |                 |               |               |           |               |               |                |                  |                   |                   |              |                   |                  |
| < 65.3                    | 33              | 21            | 63.64         | ----      | ----          | ----          | ----           | 0.77             | 6.046e-01         | 2.198             | 9.19e-01     | 9.19e-01          | 5.94e-01         |
| [ 65.3,72.8)              | 33              | 20            | 60.61         | 8.841e-01 | 4.783e-01     | 1.634         | 6.944e-01      | 1.01             | 8.620e-01         |                   |              |                   |                  |
| ≥ 72.8                    | 33              | 22            | 66.67         | 9.105e-01 | 4.981e-01     | 1.664         | 7.607e-01      | 1.51             | 7.990e-01         |                   |              |                   |                  |
| <b>Profile Likelihood</b> |                 |               |               |           |               |               |                |                  |                   |                   |              |                   |                  |
| <67.8                     | 46              | 29            | 63.04         | ----      | ----          | ----          | ----           | 0.86             | 7.634e-01         | 1.218             | 2.07e-01     | 2.03e-01          | 1.93e-02         |
| ≥67.8                     | 53              | 34            | 64.15         | 7.238e-01 | 4.392e-01     | 1.193         | 2.047e-01      | 1.32             | 9.879e-01         | 2.045             |              |                   |                  |
| <b>Quantitative</b>       |                 |               |               |           |               |               |                |                  |                   |                   |              |                   |                  |
|                           | 99              | 63            | 63.64         | 1.002     | 9.731e-01     | 1.031         | 9.069e-01      |                  |                   |                   | 9.067e-01    | 9.069e-01         |                  |

**Predictor: Gender**

|        |    |    |       |      |       |       |          |      |       |      |          |          |  |
|--------|----|----|-------|------|-------|-------|----------|------|-------|------|----------|----------|--|
| Female | 34 | 20 | 58.82 | ---- | ----  | ----  | ----     | 1.22 | 0.988 | 3.56 |          |          |  |
| Male   | 65 | 43 | 66.15 | 1.76 | 1.021 | 3.016 | 4.19E-02 | 0.86 | 0.766 | 1.51 | 3.64E-02 | 3.95E-02 |  |

**Cohort: Validation**  
**Outcome: Progression Free Survival by FVC ( Lung Transplant is Censored )**  
**Predictor: Baseline (4-month) FVC % Predicted**

|                           | Patients<br>(N) | Events<br>(n) | Events<br>(%) | HR        | HR<br>95% LCL | HR<br>95% UCL | Wald<br>pvalue | Median<br>(yrs.) | Median<br>95% LCL | Median<br>95% UCL | LR<br>pvalue | Logrank<br>pvalue | DevLIN<br>pvalue |
|---------------------------|-----------------|---------------|---------------|-----------|---------------|---------------|----------------|------------------|-------------------|-------------------|--------------|-------------------|------------------|
| <b>Quintiles</b>          |                 |               |               |           |               |               |                |                  |                   |                   |              |                   |                  |
| < 48.7                    | 18              | 15            | 83.33         | ----      | ----          | ----          | ----           | 1.01             | 5.935e-01         | 2.888             | 3.98e-03     | 9.54e-03          | 8.99e-02         |
| [ 48.7,54.9)              | 16              | 12            | 75.00         | 1.435     | 6.606e-01     | 3.116         | 3.617e-01      | 1.13             | 4.759e-01         |                   |              |                   |                  |
| [ 54.9,62)                | 17              | 13            | 76.47         | 1.537     | 7.042e-01     | 3.355         | 2.804e-01      | 0.82             | 5.471e-01         |                   |              |                   |                  |
| [ 62,77.2)                | 17              | 11            | 64.71         | 1.064     | 4.784e-01     | 2.369         | 8.783e-01      | 0.86             | 7.251e-01         |                   |              |                   |                  |
| ≥ 77.2                    | 18              | 6             | 33.33         | 3.057e-01 | 1.178e-01     | 7.937e-01     | 1.490e-02      | 5.13             | 2.198             |                   |              |                   |                  |
| <b>Quartiles</b>          |                 |               |               |           |               |               |                |                  |                   |                   |              |                   |                  |
| < 49.7                    | 21              | 18            | 85.71         | ----      | ----          | ----          | ----           | 1.01             | 5.935e-01         | 2.702             | 6.53e-03     | 1.10e-02          | 4.62e-02         |
| [ 49.7,58.2)              | 22              | 14            | 63.64         | 1.289     | 6.304e-01     | 2.635         | 4.868e-01      | 0.85             | 4.977e-01         |                   |              |                   |                  |
| [ 58.2,72.6)              | 22              | 16            | 72.73         | 1.387     | 6.916e-01     | 2.784         | 3.566e-01      | 0.82             | 7.032e-01         | 1.130             |              |                   |                  |
| ≥ 72.6                    | 21              | 9             | 42.86         | 3.924e-01 | 1.754e-01     | 8.777e-01     | 2.275e-02      | 2.20             | 1.511             |                   |              |                   |                  |
| <b>Tertiles</b>           |                 |               |               |           |               |               |                |                  |                   |                   |              |                   |                  |
| < 51.8                    | 28              | 23            | 82.14         | ----      | ----          | ----          | ----           | 1.01             | 5.935e-01         | 2.094             | 2.58e-03     | 3.72e-03          | 1.24e-01         |
| [ 51.8,67.6)              | 30              | 21            | 70.00         | 1.279     | 6.915e-01     | 2.367         | 4.326e-01      | 0.82             | 7.032e-01         | 1.130             |              |                   |                  |
| ≥ 67.6                    | 28              | 13            | 46.43         | 3.982e-01 | 1.974e-01     | 8.032e-01     | 1.012e-02      | 1.91             | 9.879e-01         |                   |              |                   |                  |
| <b>Profile Likelihood</b> |                 |               |               |           |               |               |                |                  |                   |                   |              |                   |                  |
| < 76.1                    | 68              | 51            | 75.00         | ----      | ----          | ----          | ----           | 0.85             | 7.634e-01         | 1.127             | 2.09e-04     | 7.38e-04          | 2.13e-02         |
| ≥ 76.1                    | 18              | 6             | 33.33         | 2.560e-01 | 1.093e-01     | 5.999e-01     | 1.713e-03      | 5.13             | 2.198             |                   |              |                   |                  |
| <b>Quantitative</b>       |                 |               |               |           |               |               |                |                  |                   |                   |              |                   |                  |
|                           | 86              | 57            | 66.28         | 9.801e-01 | 9.666e-01     | 9.938e-01     | 4.634e-03      |                  |                   |                   | 3.615e-03    | 4.106e-03         |                  |

**Cohort: Validation**

**Outcome: Progression Free Survival by FVC ( Lung Transplant is Censored )**

**Predictor: Baseline (4-month) DLco % Predicted**

|                           | Patients<br>(N) | Events<br>(n) | Events<br>(%) | HR        | HR<br>95% LCL | HR<br>95% UCL | Wald<br>pvalue | Median<br>(yrs.) | Median<br>95% LCL | Median<br>95% UCL | LR<br>pvalue | Logrank<br>pvalue | DevLIN<br>pvalue |
|---------------------------|-----------------|---------------|---------------|-----------|---------------|---------------|----------------|------------------|-------------------|-------------------|--------------|-------------------|------------------|
| <b>Quintiles</b>          |                 |               |               |           |               |               |                |                  |                   |                   |              |                   |                  |
| < 30.1                    | 17              | 10            | 58.82         | ----      | ----          | ----          | ----           | 0.99             | 4.349e-01         |                   | 1.97e-01     | 1.75e-01          | 7.91e-01         |
| [ 30.1,38.8)              | 15              | 13            | 86.67         | 7.234e-01 | 3.109e-01     | 1.683         | 4.523e-01      | 0.83             | 7.032e-01         |                   |              |                   |                  |
| [ 38.8,46)                | 16              | 11            | 68.75         | 6.228e-01 | 2.570e-01     | 1.510         | 2.945e-01      | 0.99             | 4.977e-01         |                   |              |                   |                  |
| [ 46,62.2)                | 16              | 10            | 62.50         | 3.973e-01 | 1.618e-01     | 9.754e-01     | 4.398e-02      | 1.26             | 8.538e-01         |                   |              |                   |                  |
| ≥ 62.2                    | 17              | 9             | 52.94         | 4.004e-01 | 1.605e-01     | 9.989e-01     | 4.972e-02      | 1.51             | 8.620e-01         |                   |              |                   |                  |
| <b>Quartiles</b>          |                 |               |               |           |               |               |                |                  |                   |                   |              |                   |                  |
| < 31.7                    | 21              | 13            | 61.90         | ----      | ----          | ----          | ----           | 1.05             | 5.935e-01         |                   | 9.35e-02     | 9.54e-02          | 1.34e-02         |
| [ 31.7,43.7)              | 19              | 16            | 84.21         | 1.064     | 5.020e-01     | 2.255         | 8.715e-01      | 0.77             | 4.950e-01         | 2.370             |              |                   |                  |
| [ 43.7,56.5)              | 20              | 11            | 55.00         | 4.439e-01 | 1.942e-01     | 1.015         | 5.415e-02      | 1.56             | 7.660e-01         |                   |              |                   |                  |
| ≥ 56.5                    | 21              | 13            | 61.90         | 6.443e-01 | 2.957e-01     | 1.404         | 2.687e-01      | 0.98             | 8.236e-01         |                   |              |                   |                  |
| <b>Tertiles</b>           |                 |               |               |           |               |               |                |                  |                   |                   |              |                   |                  |
| < 34.6                    | 27              | 18            | 66.67         | ----      | ----          | ----          | ----           | 0.99             | 5.935e-01         |                   | 1.41e-01     | 1.47e-01          | 9.42e-01         |
| [ 34.6,47.8)              | 27              | 21            | 77.78         | 8.130e-01 | 4.268e-01     | 1.549         | 5.290e-01      | 0.82             | 6.046e-01         | 2.370             |              |                   |                  |
| ≥ 47.8                    | 27              | 14            | 51.85         | 5.056e-01 | 2.505e-01     | 1.020         | 5.697e-02      | 1.51             | 9.386e-01         |                   |              |                   |                  |
| <b>Profile Likelihood</b> |                 |               |               |           |               |               |                |                  |                   |                   |              |                   |                  |
| < 47.0                    | 51              | 37            | 72.55         | ----      | ----          | ----          | ----           | 0.83             | 7.251e-01         | 1.180             | 1.31e-02     | 1.47e-02          | 3.44e-01         |
| ≥ 47.0                    | 30              | 16            | 53.33         | 4.879e-01 | 2.708e-01     | 8.789e-01     | 1.685e-02      | 1.51             | 9.386e-01         |                   |              |                   |                  |
| <b>Quantitative</b>       |                 |               |               |           |               |               |                |                  |                   |                   |              |                   |                  |
|                           | 81              | 53            | 65.43         | 9.817e-01 | 9.663e-01     | 9.974e-01     | 2.226e-02      |                  |                   |                   | 1.526e-02    | 2.134e-02         |                  |

**Cohort: Validation**

**Outcome: Progression Free Survival by FVC ( Lung Transplant is Censored )**

**Predictor: Baseline (4-month) CPI**

|                           | Patients<br>(N) | Events<br>(n) | Events<br>(%) | HR    | HR<br>95% LCL | HR<br>95% UCL | Wald<br>pvalue | Median<br>(yrs.) | Median<br>95% LCL | Median<br>95% UCL | LR<br>pvalue | Logrank<br>pvalue | DevLIN<br>pvalue |
|---------------------------|-----------------|---------------|---------------|-------|---------------|---------------|----------------|------------------|-------------------|-------------------|--------------|-------------------|------------------|
| <b>Quintiles</b>          |                 |               |               |       |               |               |                |                  |                   |                   |              |                   |                  |
| < 41.2                    | 17              | 9             | 52.94         | ----  | ----          | ----          | ----           | 1.51             | 8.236e-01         |                   | 2.31e-01     | 2.07e-01          | 2.02e-01         |
| [ 41.2,50.9)              | 15              | 9             | 60.00         | 1.054 | 4.162e-01     | 2.670         | 9.114e-01      | 1.55             | 9.386e-01         |                   |              |                   |                  |
| [ 50.9,59.1)              | 17              | 11            | 64.71         | 1.820 | 7.512e-01     | 4.409         | 1.848e-01      | 0.77             | 4.950e-01         |                   |              |                   |                  |
| [ 59.1,65.3)              | 16              | 13            | 81.25         | 1.530 | 6.425e-01     | 3.643         | 3.368e-01      | 1.56             | 4.977e-01         |                   |              |                   |                  |
| ≥ 65.3                    | 16              | 11            | 68.75         | 2.493 | 1.017         | 6.110         | 4.574e-02      | 1.01             | 4.349e-01         |                   |              |                   |                  |
| <b>Quartiles</b>          |                 |               |               |       |               |               |                |                  |                   |                   |              |                   |                  |
| < 44.4                    | 21              | 11            | 52.38         | ----  | ----          | ----          | ----           | 1.13             | 8.236e-01         |                   | 9.49e-02     | 9.02e-02          | 3.36e-01         |
| [ 44.4,55.5)              | 19              | 11            | 57.89         | 1.006 | 4.348e-01     | 2.325         | 9.896e-01      | 1.26             | 8.538e-01         |                   |              |                   |                  |
| [ 55.5,64.1)              | 21              | 16            | 76.19         | 1.993 | 9.133e-01     | 4.347         | 8.323e-02      | 0.73             | 4.950e-01         |                   |              |                   |                  |
| ≥ 64.1                    | 20              | 15            | 75.00         | 2.081 | 9.478e-01     | 4.567         | 6.781e-02      | 1.01             | 4.349e-01         |                   |              |                   |                  |
| <b>Tertiles</b>           |                 |               |               |       |               |               |                |                  |                   |                   |              |                   |                  |
| < 49.9                    | 27              | 15            | 55.56         | ----  | ----          | ----          | ----           | 1.26             | 9.386e-01         |                   | 1.75e-01     | 1.65e-01          | 2.97e-01         |
| [ 49.9,60.6)              | 27              | 18            | 66.67         | 1.323 | 6.629e-01     | 2.642         | 4.269e-01      | 0.82             | 7.251e-01         | 2.888             |              |                   |                  |
| ≥ 60.6                    | 27              | 20            | 74.07         | 1.891 | 9.632e-01     | 3.711         | 6.417e-02      | 1.01             | 4.977e-01         | 2.094             |              |                   |                  |
| <b>Profile Likelihood</b> |                 |               |               |       |               |               |                |                  |                   |                   |              |                   |                  |
| <53.0                     | 36              | 19            | 52.78         | ----  | ----          | ----          | ----           | 1.51             | 9.386e-01         |                   | 2.52e-03     | 2.53e-03          | 1.96e-01         |
| ≥53.0                     | 45              | 34            | 75.56         | 2.365 | 1.331         | 4.203         | 3.350e-03      | 0.77             | 5.935e-01         | 1.180             |              |                   |                  |
| <b>Quantitative</b>       | 81              | 53            | 65.43         | 1.029 | 1.007         | 1.052         | 8.322e-03      |                  |                   |                   | 5.057e-03    | 7.622e-03         |                  |

**Cohort: Validation**  
**Outcome: Progression Free Survival by FVC ( Lung Transplant is Censored )**  
**Predictor: Baseline (3-month) FVC % Predicted**

|                           | Patients<br>(N) | Events<br>(n) | Events<br>(%) | HR        | HR<br>95% LCL | HR<br>95% UCL | Wald<br>pvalue | Median<br>(yrs.) | Median<br>95% LCL | Median<br>95% UCL | LR<br>pvalue | Logrank<br>pvalue | DevLIN<br>pvalue |
|---------------------------|-----------------|---------------|---------------|-----------|---------------|---------------|----------------|------------------|-------------------|-------------------|--------------|-------------------|------------------|
| <b>Quintiles</b>          |                 |               |               |           |               |               |                |                  |                   |                   |              |                   |                  |
| < 48.9                    | 15              | 12            | 80.00         | ----      | ----          | ----          | ----           | 0.99             | 5.935e-01         |                   | 5.58e-03     | 1.21e-02          | 1.35e-01         |
| [ 48.9,55.7)              | 14              | 9             | 64.29         | 1.140     | 4.723e-01     | 2.754         | 7.701e-01      | 1.13             | 4.759e-01         |                   |              |                   |                  |
| [ 55.7,62)                | 13              | 11            | 84.62         | 1.552     | 6.642e-01     | 3.626         | 3.101e-01      | 0.82             | 4.977e-01         |                   |              |                   |                  |
| [ 62,76.7)                | 16              | 10            | 62.50         | 8.864e-01 | 3.759e-01     | 2.091         | 7.830e-01      | 0.86             | 7.251e-01         |                   |              |                   |                  |
| ≥ 76.7                    | 15              | 5             | 33.33         | 2.512e-01 | 8.770e-02     | 7.193e-01     | 1.006e-02      | 5.13             | 2.198             |                   |              |                   |                  |
| <b>Quartiles</b>          |                 |               |               |           |               |               |                |                  |                   |                   |              |                   |                  |
| < 49.7                    | 18              | 15            | 83.33         | ----      | ----          | ----          | ----           | 1.01             | 5.935e-01         |                   | 1.20e-02     | 2.01e-02          | 1.24e-01         |
| [ 49.7,58.8)              | 18              | 11            | 61.11         | 1.230     | 5.519e-01     | 2.739         | 6.131e-01      | 0.85             | 4.977e-01         |                   |              |                   |                  |
| [ 58.8,73.3)              | 19              | 13            | 68.42         | 1.182     | 5.512e-01     | 2.533         | 6.680e-01      | 0.82             | 7.032e-01         |                   |              |                   |                  |
| ≥ 73.3                    | 18              | 8             | 44.44         | 3.483e-01 | 1.468e-01     | 8.265e-01     | 1.674e-02      | 2.20             | 1.511             |                   |              |                   |                  |
| <b>Tertiles</b>           |                 |               |               |           |               |               |                |                  |                   |                   |              |                   |                  |
| < 51.8                    | 24              | 19            | 79.17         | ----      | ----          | ----          | ----           | 1.01             | 5.935e-01         | 2.094             | 1.57e-03     | 2.29e-03          | 8.93e-02         |
| [ 51.8,68.1)              | 25              | 17            | 68.00         | 1.339     | 6.754e-01     | 2.657         | 4.028e-01      | 0.82             | 7.032e-01         | 1.130             |              |                   |                  |
| ≥ 68.1                    | 24              | 11            | 45.83         | 3.446e-01 | 1.590e-01     | 7.467e-01     | 6.929e-03      | 2.20             | 1.264             |                   |              |                   |                  |
| <b>Profile Likelihood</b> |                 |               |               |           |               |               |                |                  |                   |                   |              |                   |                  |
| < 76.1                    | 58              | 42            | 72.41         | ----      | ----          | ----          | ----           | 0.86             | 7.660e-01         | 1.127             | 3.21e-04     | 1.04e-03          | 3.81e-02         |
| ≥ 76.1                    | 15              | 5             | 33.33         | 2.340e-01 | 9.145e-02     | 5.986e-01     | 2.441e-03      | 5.13             | 2.198             |                   |              |                   |                  |
| <b>Quantitative</b>       |                 |               |               |           |               |               |                |                  |                   |                   |              |                   |                  |
|                           | 73              | 47            | 64.38         | 9.785e-01 | 9.644e-01     | 9.928e-01     | 3.375e-03      |                  |                   |                   | 2.848e-03    | 2.834e-03         |                  |

**Cohort: Validation**

**Outcome: Progression Free Survival by FVC ( Lung Transplant is Censored )**

**Predictor: Baseline (3-month) DLco % Predicted**

|                           | Patients<br>(N) | Events<br>(n) | Events<br>(%) | HR        | HR<br>95% LCL | HR<br>95% UCL | Wald<br>pvalue | Median<br>(yrs.) | Median<br>95% LCL | Median<br>95% UCL | LR<br>pvalue | Logrank<br>pvalue | DevLIN<br>pvalue |
|---------------------------|-----------------|---------------|---------------|-----------|---------------|---------------|----------------|------------------|-------------------|-------------------|--------------|-------------------|------------------|
| <b>Quintiles</b>          |                 |               |               |           |               |               |                |                  |                   |                   |              |                   |                  |
| < 28.6                    | 14              | 8             | 57.14         | ----      | ----          | ----          | ----           | 1.13             | 4.349e-01         |                   | 1.95e-01     | 1.67e-01          | 7.52e-01         |
| [ 28.6,38.3)              | 13              | 10            | 76.92         | 9.968e-01 | 3.888e-01     | 2.556         | 9.946e-01      | 0.82             | 4.595e-01         |                   |              |                   |                  |
| [ 38.3,46)                | 13              | 9             | 69.23         | 5.880e-01 | 2.176e-01     | 1.589         | 2.950e-01      | 0.99             | 7.251e-01         |                   |              |                   |                  |
| [ 46,61.3)                | 14              | 9             | 64.29         | 4.147e-01 | 1.547e-01     | 1.112         | 8.019e-02      | 1.26             | 8.538e-01         |                   |              |                   |                  |
| ≥ 61.3                    | 14              | 8             | 57.14         | 4.247e-01 | 1.562e-01     | 1.155         | 9.330e-02      | 1.51             | 8.620e-01         |                   |              |                   |                  |
| <b>Quartiles</b>          |                 |               |               |           |               |               |                |                  |                   |                   |              |                   |                  |
| < 30.9                    | 18              | 10            | 55.56         | ----      | ----          | ----          | ----           | 1.05             | 5.935e-01         |                   | 6.30e-01     | 6.25e-01          | 1.95e-01         |
| [ 30.9,43.8)              | 16              | 12            | 75.00         | 8.967e-01 | 3.775e-01     | 2.130         | 8.049e-01      | 0.99             | 4.977e-01         |                   |              |                   |                  |
| [ 43.8,55.1)              | 16              | 11            | 68.75         | 6.684e-01 | 2.766e-01     | 1.616         | 3.710e-01      | 1.26             | 7.251e-01         |                   |              |                   |                  |
| ≥ 55.1                    | 18              | 11            | 61.11         | 6.109e-01 | 2.572e-01     | 1.451         | 2.642e-01      | 1.13             | 8.620e-01         |                   |              |                   |                  |
| <b>Tertiles</b>           |                 |               |               |           |               |               |                |                  |                   |                   |              |                   |                  |
| < 33.8                    | 22              | 13            | 59.09         | ----      | ----          | ----          | ----           | 1.05             | 5.935e-01         |                   | 2.14e-01     | 2.28e-01          | 8.23e-01         |
| [ 33.8,47.4)              | 24              | 19            | 79.17         | 8.978e-01 | 4.297e-01     | 1.876         | 7.744e-01      | 0.79             | 6.046e-01         | 2.198             |              |                   |                  |
| ≥ 47.4                    | 22              | 12            | 54.55         | 5.312e-01 | 2.406e-01     | 1.173         | 1.174e-01      | 1.39             | 9.386e-01         |                   |              |                   |                  |
| <b>Profile Likelihood</b> |                 |               |               |           |               |               |                |                  |                   |                   |              |                   |                  |
| < 39.5                    | 28              | 19            | 67.86         | ----      | ----          | ----          | ----           | 0.82             | 4.977e-01         | 1.218             | 9.78e-03     | 6.81e-03          | 1.37e-01         |
| ≥ 39.5                    | 40              | 25            | 62.50         | 4.283e-01 | 2.278e-01     | 8.053e-01     | 8.483e-03      | 1.26             | 9.386e-01         | 2.702             |              |                   |                  |
| <b>Quantitative</b>       | 68              | 44            | 64.71         | 9.826e-01 | 9.663e-01     | 9.992e-01     | 4.053e-02      |                  |                   |                   | 3.040e-02    | 3.928e-02         |                  |

**Cohort: Validation**  
**Outcome: Progression Free Survival by FVC ( Lung Transplant is Censored )**  
**Predictor: Baseline (3-month) CPI**

|                           | Patients<br>(N) | Events<br>(n) | Events<br>(%) | HR        | HR<br>95% LCL | HR<br>95% UCL | Wald<br>pvalue | Median<br>(yrs.) | Median<br>95% LCL | Median<br>95% UCL | LR<br>pvalue | Logrank<br>pvalue | DevLIN<br>pvalue |
|---------------------------|-----------------|---------------|---------------|-----------|---------------|---------------|----------------|------------------|-------------------|-------------------|--------------|-------------------|------------------|
| <b>Quintiles</b>          |                 |               |               |           |               |               |                |                  |                   |                   |              |                   |                  |
| < 42.9                    | 14              | 8             | 57.14         | ----      | ----          | ----          | ----           | 1.13             | 8.236e-01         |                   | 2.04e-01     | 1.68e-01          | 9.83e-02         |
| [ 42.9,51.7)              | 13              | 8             | 61.54         | 9.146e-01 | 3.395e-01     | 2.464         | 8.598e-01      | 1.55             | 9.770e-01         |                   |              |                   |                  |
| [ 51.7,59.8)              | 14              | 8             | 57.14         | 1.099     | 4.096e-01     | 2.947         | 8.518e-01      | 0.77             | 7.032e-01         |                   |              |                   |                  |
| [ 59.8,66)                | 14              | 12            | 85.71         | 2.257     | 9.100e-01     | 5.597         | 7.900e-02      | 0.71             | 4.595e-01         |                   |              |                   |                  |
| ≥ 66                      | 13              | 8             | 61.54         | 1.940     | 7.129e-01     | 5.279         | 1.945e-01      | 1.05             | 4.349e-01         |                   |              |                   |                  |
| <b>Quartiles</b>          |                 |               |               |           |               |               |                |                  |                   |                   |              |                   |                  |
| < 45.4                    | 18              | 11            | 61.11         | ----      | ----          | ----          | ----           | 1.26             | 8.620e-01         |                   | 1.19e-01     | 9.08e-02          | 6.27e-01         |
| [ 45.4,56)                | 16              | 9             | 56.25         | 1.038     | 4.281e-01     | 2.515         | 9.346e-01      | 0.99             | 8.538e-01         |                   |              |                   |                  |
| [ 56,64.8)                | 17              | 12            | 70.59         | 1.575     | 6.880e-01     | 3.605         | 2.824e-01      | 0.82             | 7.032e-01         |                   |              |                   |                  |
| ≥ 64.8                    | 17              | 12            | 70.59         | 2.602     | 1.117         | 6.063         | 2.671e-02      | 0.99             | 4.349e-01         |                   |              |                   |                  |
| <b>Tertiles</b>           |                 |               |               |           |               |               |                |                  |                   |                   |              |                   |                  |
| < 50.3                    | 22              | 14            | 63.64         | ----      | ----          | ----          | ----           | 1.39             | 9.386e-01         |                   | 3.72e-02     | 2.31e-02          | 2.68e-01         |
| [ 50.3,62.2)              | 24              | 14            | 58.33         | 1.045     | 4.927e-01     | 2.218         | 9.080e-01      | 0.85             | 7.251e-01         |                   |              |                   |                  |
| ≥ 62.2                    | 22              | 16            | 72.73         | 2.452     | 1.175         | 5.118         | 1.687e-02      | 0.99             | 4.349e-01         | 1.218             |              |                   |                  |
| <b>Profile Likelihood</b> |                 |               |               |           |               |               |                |                  |                   |                   |              |                   |                  |
| <53.0                     | 29              | 16            | 55.17         | ----      | ----          | ----          | ----           | 1.51             | 9.770e-01         |                   | 3.08e-03     | 3.00e-03          | 1.33e-01         |
| ≥53.0                     | 39              | 28            | 71.79         | 2.535     | 1.344         | 4.780         | 4.053e-03      | 0.82             | 5.935e-01         | 1.180             |              |                   |                  |
| <b>Quantitative</b>       | 68              | 44            | 64.71         | 1.029     | 1.006         | 1.053         | 1.523e-02      |                  |                   |                   | 9.810e-03    | 1.407e-02         |                  |

**Cohort: Validation**

**Outcome: Progression Free Survival by FVC ( Lung Transplant is Censored )**

**Predictor: MMP7Elisa ( ng / mL )**

|                           | Patients<br>(N) | Events<br>(n) | Events<br>(%) | HR        | HR<br>95% LCL | HR<br>95% UCL | Wald<br>pvalue | Median<br>(yrs.) | Median<br>95% LCL | Median<br>95% UCL | LR<br>pvalue | Logrank<br>pvalue | DevLIN<br>pvalue |
|---------------------------|-----------------|---------------|---------------|-----------|---------------|---------------|----------------|------------------|-------------------|-------------------|--------------|-------------------|------------------|
| <b>Quintiles</b>          |                 |               |               |           |               |               |                |                  |                   |                   |              |                   |                  |
| < 3.41                    | 19              | 13            | 68.42         | ----      | ----          | ----          | ----           | 0.86             | 7.990e-01         |                   | 5.32e-01     | 4.98e-01          | 4.79e-01         |
| [ 3.41,4.56)              | 19              | 12            | 63.16         | 7.000e-01 | 3.157e-01     | 1.552         | 3.799e-01      | 1.51             | 7.661e-01         |                   |              |                   |                  |
| [ 4.56,5.49)              | 20              | 13            | 65.00         | 6.983e-01 | 3.195e-01     | 1.526         | 3.680e-01      | 1.70             | 4.595e-01         |                   |              |                   |                  |
| [ 5.49,7.52)              | 20              | 13            | 65.00         | 1.215     | 5.570e-01     | 2.652         | 6.242e-01      | 0.79             | 5.800e-01         |                   |              |                   |                  |
| ≥ 7.52                    | 21              | 12            | 57.14         | 6.925e-01 | 3.121e-01     | 1.537         | 3.661e-01      | 1.32             | 1.180             |                   |              |                   |                  |
| <b>Quartiles</b>          |                 |               |               |           |               |               |                |                  |                   |                   |              |                   |                  |
| < 3.54                    | 24              | 16            | 66.67         | ----      | ----          | ----          | ----           | 0.98             | 8.538e-01         |                   | 8.60e-01     | 8.53e-01          | 2.99e-01         |
| [ 3.54,4.94)              | 24              | 14            | 58.33         | 9.645e-01 | 4.688e-01     | 1.984         | 9.218e-01      | 1.70             | 7.251e-01         |                   |              |                   |                  |
| [ 4.94,6.46)              | 25              | 18            | 72.00         | 1.271     | 6.453e-01     | 2.503         | 4.880e-01      | 0.77             | 4.759e-01         | 2.198             |              |                   |                  |
| ≥ 6.46                    | 26              | 15            | 57.69         | 1.015     | 5.000e-01     | 2.062         | 9.663e-01      | 1.22             | 8.346e-01         |                   |              |                   |                  |
| <b>Tertiles</b>           |                 |               |               |           |               |               |                |                  |                   |                   |              |                   |                  |
| < 3.99                    | 33              | 21            | 63.64         | ----      | ----          | ----          | ----           | 0.99             | 8.538e-01         |                   | 8.72e-01     | 8.71e-01          | 2.69e-01         |
| [ 3.99,5.91)              | 32              | 23            | 71.88         | 1.172     | 6.461e-01     | 2.127         | 6.012e-01      | 0.99             | 4.950e-01         | 2.094             |              |                   |                  |
| ≥ 5.91                    | 34              | 19            | 55.88         | 1.077     | 5.775e-01     | 2.010         | 8.145e-01      | 1.18             | 8.235e-01         |                   |              |                   |                  |
| <b>Profile Likelihood</b> |                 |               |               |           |               |               |                |                  |                   |                   |              |                   |                  |
| < 4.7                     | 43              | 26            | 60.47         | ----      | ----          | ----          | ----           | 1.13             | 8.620e-01         | 2.335             | 2.48e-01     | 2.48e-01          | 1.84e-02         |
| ≥ 4.7                     | 56              | 37            | 66.07         | 1.344     | 8.116e-01     | 2.225         | 2.507e-01      | 1.01             | 7.660e-01         | 1.552             |              |                   |                  |
| <b>Quantitative</b>       |                 |               |               |           |               |               |                |                  |                   |                   |              |                   |                  |
|                           | 99              | 63            | 63.64         | 9.635e-01 | 8.894e-01     | 1.044         | 3.631e-01      |                  |                   |                   | 3.407e-01    | 3.622e-01         |                  |



**Cohort: Validation**  
**Outcome: Progression Free Survival by FVC ( Lung Transplant is Censored )**  
**Predictor: ICAM ( ng / mL )**

|                           | Patients<br>(N) | Events<br>(n) | Events<br>(%) | HR        | HR<br>95% LCL | HR<br>95% UCL | Wald<br>pvalue | Median<br>(yrs.) | Median<br>95% LCL | Median<br>95% UCL | LR<br>pvalue | Logrank<br>pvalue | DevLIN<br>pvalue |
|---------------------------|-----------------|---------------|---------------|-----------|---------------|---------------|----------------|------------------|-------------------|-------------------|--------------|-------------------|------------------|
| <b>Quintiles</b>          |                 |               |               |           |               |               |                |                  |                   |                   |              |                   |                  |
| < 226                     | 20              | 10            | 50.00         | ----      | ----          | ----          | ----           | 0.99             | 8.235e-01         |                   | 9.49e-02     | 9.29e-02          | 2.15e-01         |
| [ 226,281)                | 20              | 11            | 55.00         | 9.323e-01 | 3.934e-01     | 2.210         | 8.735e-01      | 1.70             | 1.127             |                   |              |                   |                  |
| [ 281,326)                | 18              | 13            | 72.22         | 1.941     | 8.286e-01     | 4.547         | 1.267e-01      | 0.85             | 4.595e-01         |                   |              |                   |                  |
| [ 326,419)                | 20              | 14            | 70.00         | 2.340     | 1.025         | 5.342         | 4.349e-02      | 0.82             | 4.950e-01         |                   |              |                   |                  |
| ≥ 419                     | 21              | 15            | 71.43         | 1.740     | 7.657e-01     | 3.954         | 1.860e-01      | 1.22             | 7.634e-01         |                   |              |                   |                  |
| <b>Quartiles</b>          |                 |               |               |           |               |               |                |                  |                   |                   |              |                   |                  |
| < 238                     | 25              | 13            | 52.00         | ----      | ----          | ----          | ----           | 1.01             | 8.346e-01         |                   | 3.53e-02     | 2.82e-02          | 9.04e-02         |
| [ 238,303)                | 24              | 13            | 54.17         | 9.703e-01 | 4.482e-01     | 2.101         | 9.391e-01      | 1.70             | 9.770e-01         |                   |              |                   |                  |
| [ 303,387)                | 24              | 19            | 79.17         | 2.366     | 1.158         | 4.833         | 1.818e-02      | 0.73             | 4.950e-01         | 1.322             |              |                   |                  |
| ≥ 387                     | 26              | 18            | 69.23         | 1.745     | 8.440e-01     | 3.610         | 1.330e-01      | 1.22             | 7.032e-01         | 2.335             |              |                   |                  |
| <b>Tertiles</b>           |                 |               |               |           |               |               |                |                  |                   |                   |              |                   |                  |
| < 258                     | 34              | 17            | 50.00         | ----      | ----          | ----          | ----           | 1.18             | 9.879e-01         |                   | 6.69e-03     | 7.91e-03          | 2.94e-02         |
| [ 258,367)                | 31              | 23            | 74.19         | 2.718     | 1.401         | 5.273         | 3.101e-03      | 0.82             | 5.471e-01         | 1.697             |              |                   |                  |
| ≥ 367                     | 34              | 23            | 67.65         | 2.092     | 1.097         | 3.988         | 2.500e-02      | 1.22             | 7.634e-01         | 2.094             |              |                   |                  |
| <b>Profile Likelihood</b> |                 |               |               |           |               |               |                |                  |                   |                   |              |                   |                  |
| <262.0                    | 35              | 17            | 48.57         | ----      | ----          | ----          | ----           | 1.18             | 1.007             |                   | 1.47e-03     | 1.98e-03          | 4.67e-03         |
| ≥262.0                    | 64              | 46            | 71.88         | 2.432     | 1.361         | 4.347         | 2.697e-03      | 0.85             | 7.251e-01         | 1.511             |              |                   |                  |
| <b>Quantitative</b>       | 99              | 63            | 63.64         | 1.002     | 0.9997        | 1.004         | 8.066e-02      |                  |                   |                   | 8.504e-02    | 7.940e-02         |                  |

Cohort: **Validation**

Outcome: **Progression Free Survival by FVC ( Lung Transplant is Censored )**

Predictor: **IL8 ( ng / mL )**

|                           | Patients<br>(N) | Events<br>(n) | Events<br>(%) | HR    | HR<br>95% LCL | HR<br>95% UCL | Wald<br>pvalue | Median<br>(yrs.) | Median<br>95% LCL | Median<br>95% UCL | LR<br>pvalue | Logrank<br>pvalue | DevLIN<br>pvalue |
|---------------------------|-----------------|---------------|---------------|-------|---------------|---------------|----------------|------------------|-------------------|-------------------|--------------|-------------------|------------------|
| <b>Quintiles</b>          |                 |               |               |       |               |               |                |                  |                   |                   |              |                   |                  |
| < 0.00767                 | 19              | 11            | 57.89         | ----  | ----          | ----          | ----           | 0.99             | 7.660e-01         |                   | 8.85e-01     | 8.91e-01          | 9.39e-01         |
| [ 0.00767,0.0101)         | 20              | 14            | 70.00         | 1.561 | 6.353e-01     | 3.838         | 3.314e-01      | 1.05             | 7.934e-01         |                   |              |                   |                  |
| [ 0.0101,0.0131)          | 18              | 10            | 55.56         | 1.305 | 5.685e-01     | 2.998         | 5.297e-01      | 1.18             | 4.513e-01         |                   |              |                   |                  |
| [ 0.0131,0.0178)          | 20              | 13            | 65.00         | 1.432 | 6.324e-01     | 3.245         | 3.890e-01      | 1.13             | 8.346e-01         |                   |              |                   |                  |
| ≥ 0.0178                  | 20              | 14            | 70.00         | 1.352 | 5.886e-01     | 3.107         | 4.771e-01      | 0.99             | 5.935e-01         |                   |              |                   |                  |
| <b>Quartiles</b>          |                 |               |               |       |               |               |                |                  |                   |                   |              |                   |                  |
| < 0.00825                 | 24              | 15            | 62.50         | ----  | ----          | ----          | ----           | 0.99             | 7.660e-01         |                   | 9.29e-01     | 9.29e-01          | 9.27e-01         |
| [ 0.00825,0.0112)         | 24              | 15            | 62.50         | 1.287 | 6.077e-01     | 2.726         | 5.097e-01      | 1.01             | 7.251e-01         |                   |              |                   |                  |
| [ 0.0112,0.0164)          | 24              | 14            | 58.33         | 1.169 | 5.802e-01     | 2.354         | 6.626e-01      | 0.98             | 7.990e-01         |                   |              |                   |                  |
| ≥ 0.0164                  | 25              | 18            | 72.00         | 1.159 | 5.517e-01     | 2.433         | 6.974e-01      | 1.13             | 7.661e-01         | 2.888             |              |                   |                  |
| <b>Tertiles</b>           |                 |               |               |       |               |               |                |                  |                   |                   |              |                   |                  |
| < 0.00959                 | 32              | 19            | 59.38         | ----  | ----          | ----          | ----           | 1.01             | 8.235e-01         |                   | 6.43e-01     | 6.48e-01          | 7.54e-01         |
| [ 0.00959,0.015)          | 32              | 20            | 62.50         | 1.252 | 6.747e-01     | 2.322         | 4.764e-01      | 0.83             | 7.251e-01         |                   |              |                   |                  |
| ≥ 0.015                   | 33              | 23            | 69.70         | 1.337 | 7.015e-01     | 2.547         | 3.777e-01      | 1.13             | 7.990e-01         | 1.913             |              |                   |                  |
| <b>Profile Likelihood</b> |                 |               |               |       |               |               |                |                  |                   |                   |              |                   |                  |
| < 0.0092                  | 28              | 16            | 57.14         | ----  | ----          | ----          | ----           | 1.01             | 8.620e-01         |                   | 1.83e-01     | 1.92e-01          | 2.93e-01         |
| ≥ 0.0092                  | 69              | 46            | 66.67         | 1.472 | 8.191e-01     | 2.645         | 1.961e-01      | 0.99             | 7.990e-01         | 1.552             |              |                   |                  |
| <b>Quantitative*</b>      |                 |               |               |       |               |               |                |                  |                   |                   |              |                   |                  |
|                           | 97              | 62            | 63.92         | 1.013 | 9.841e-01     | 1.043         | 3.786e-01      |                  |                   |                   | 4.107e-01    | 3.824e-01         |                  |

\*Units of pg / mL were used in **Quantitative model only**.

**Cohort: Validation**  
**Outcome: Progression Free Survival by FVC ( Lung Transplant is Censored )**  
**Predictor: VCAM ( ng / mL )**

|                           | Patients<br>(N) | Events<br>(n) | Events<br>(%) | HR        | HR<br>95% LCL | HR<br>95% UCL | Wald<br>pvalue | Median<br>(yrs.) | Median<br>95% LCL | Median<br>95% UCL | LR<br>pvalue | Logrank<br>pvalue | DevLIN<br>pvalue |
|---------------------------|-----------------|---------------|---------------|-----------|---------------|---------------|----------------|------------------|-------------------|-------------------|--------------|-------------------|------------------|
| <b>Quintiles</b>          |                 |               |               |           |               |               |                |                  |                   |                   |              |                   |                  |
| < 222                     | 20              | 13            | 65.00         | ----      | ----          | ----          | ----           | 1.05             | 8.235e-01         |                   | 7.24e-01     | 7.08e-01          | 5.12e-01         |
| [ 222,260)                | 20              | 15            | 75.00         | 1.327     | 6.273e-01     | 2.809         | 4.589e-01      | 0.80             | 5.471e-01         | 2.702             |              |                   |                  |
| [ 260,310)                | 19              | 10            | 52.63         | 7.870e-01 | 3.430e-01     | 1.806         | 5.718e-01      | 1.32             | 9.386e-01         |                   |              |                   |                  |
| [ 310,376)                | 20              | 13            | 65.00         | 8.454e-01 | 3.900e-01     | 1.833         | 6.706e-01      | 1.26             | 7.251e-01         |                   |              |                   |                  |
| ≥ 376                     | 20              | 12            | 60.00         | 1.023     | 4.628e-01     | 2.262         | 9.548e-01      | 1.56             | 5.935e-01         |                   |              |                   |                  |
| <b>Quartiles</b>          |                 |               |               |           |               |               |                |                  |                   |                   |              |                   |                  |
| < 230                     | 25              | 17            | 68.00         | ----      | ----          | ----          | ----           | 1.05             | 8.235e-01         |                   | 8.94e-01     | 8.92e-01          | 9.61e-01         |
| [ 230,285)                | 24              | 16            | 66.67         | 1.138     | 5.699e-01     | 2.273         | 7.137e-01      | 0.86             | 7.934e-01         |                   |              |                   |                  |
| [ 285,358)                | 25              | 16            | 64.00         | 9.275e-01 | 4.657e-01     | 1.847         | 8.305e-01      | 1.26             | 9.386e-01         |                   |              |                   |                  |
| ≥ 358                     | 25              | 14            | 56.00         | 8.655e-01 | 4.257e-01     | 1.759         | 6.898e-01      | 1.22             | 5.935e-01         |                   |              |                   |                  |
| <b>Tertiles</b>           |                 |               |               |           |               |               |                |                  |                   |                   |              |                   |                  |
| < 246                     | 34              | 24            | 70.59         | ----      | ----          | ----          | ----           | 0.83             | 7.934e-01         | 2.198             | 4.98e-01     | 4.90e-01          | 5.94e-01         |
| [ 246,334)                | 32              | 18            | 56.25         | 6.954e-01 | 3.759e-01     | 1.286         | 2.470e-01      | 0.99             | 9.386e-01         |                   |              |                   |                  |
| ≥ 334                     | 33              | 21            | 63.64         | 7.981e-01 | 4.427e-01     | 1.439         | 4.533e-01      | 1.22             | 7.634e-01         | 2.335             |              |                   |                  |
| <b>Profile Likelihood</b> |                 |               |               |           |               |               |                |                  |                   |                   |              |                   |                  |
| <246.8                    | 34              | 24            | 70.59         | ----      | ----          | ----          | ----           | 0.83             | 7.934e-01         | 2.198             | 2.71e-01     | 2.62e-01          | 3.55e-01         |
| ≥246.8                    | 65              | 39            | 60.00         | 7.473e-01 | 4.478e-01     | 1.247         | 2.649e-01      | 1.22             | 9.386e-01         | 1.913             |              |                   |                  |
| <b>Quantitative</b>       |                 |               |               |           |               |               |                |                  |                   |                   |              |                   |                  |
|                           | 99              | 63            | 63.64         | 0.9993    | 0.9968        | 1.002         | 5.467e-01      |                  |                   |                   | 5.385e-01    | 5.469e-01         |                  |

**Cohort: Validation**  
**Outcome: Progression Free Survival by FVC ( Lung Transplant is Censored )**  
**Predictor: S100A12 ( ng / mL )**

|                           | Patients<br>(N) | Events<br>(n) | Events<br>(%) | HR        | HR<br>95% LCL | HR<br>95% UCL | Wald<br>Pvalue | Median<br>(yrs.) | Median<br>95% LCL | Median<br>95% UCL | LR<br>pvalue | Logrank<br>pvalue | DevLIN<br>pvalue |
|---------------------------|-----------------|---------------|---------------|-----------|---------------|---------------|----------------|------------------|-------------------|-------------------|--------------|-------------------|------------------|
| <b>Quintiles</b>          |                 |               |               |           |               |               |                |                  |                   |                   |              |                   |                  |
| < 36.6                    | 20              | 14            | 70.00         | ----      | ----          | ----          | ----           | 0.85             | 7.251e-01         |                   | 5.76e-02     | 4.34e-02          | 1.26e-03         |
| [ 36.6,49.2)              | 19              | 10            | 52.63         | 4.946e-01 | 2.165e-01     | 1.130         | 9.494e-02      | 2.04             | 1.130             |                   |              |                   |                  |
| [ 49.2,65.9)              | 19              | 11            | 57.89         | 4.479e-01 | 1.962e-01     | 1.022         | 5.645e-02      | 1.13             | 8.346e-01         |                   |              |                   |                  |
| [ 65.9,105)               | 20              | 16            | 80.00         | 5.197e-01 | 2.323e-01     | 1.163         | 1.112e-01      | 0.82             | 7.661e-01         | 1.913             |              |                   |                  |
| ≥ 105                     | 21              | 12            | 57.14         | 1.152     | 5.591e-01     | 2.375         | 7.007e-01      | 0.99             | 5.935e-01         |                   |              |                   |                  |
| <b>Quartiles</b>          |                 |               |               |           |               |               |                |                  |                   |                   |              |                   |                  |
| < 39.7                    | 25              | 17            | 68.00         | ----      | ----          | ----          | ----           | 0.99             | 7.634e-01         |                   | 3.08e-01     | 3.24e-01          | 1.23e-01         |
| [ 39.7,54.5)              | 24              | 13            | 54.17         | 5.278e-01 | 2.527e-01     | 1.102         | 8.897e-02      | 2.20             | 1.130             |                   |              |                   |                  |
| [ 54.5,82.8)              | 24              | 16            | 66.67         | 9.322e-01 | 4.666e-01     | 1.862         | 8.423e-01      | 1.05             | 7.661e-01         | 2.888             |              |                   |                  |
| ≥ 82.8                    | 26              | 17            | 65.38         | 7.543e-01 | 3.724e-01     | 1.528         | 4.339e-01      | 0.79             | 7.032e-01         |                   |              |                   |                  |
| <b>Tertiles</b>           |                 |               |               |           |               |               |                |                  |                   |                   |              |                   |                  |
| < 43.9                    | 34              | 22            | 64.71         | ----      | ----          | ----          | ----           | 1.13             | 8.538e-01         | 2.045             | 5.36e-01     | 5.44e-01          | 6.51e-01         |
| [ 43.9,72.3)              | 31              | 18            | 58.06         | 7.823e-01 | 4.183e-01     | 1.463         | 4.422e-01      | 1.26             | 9.770e-01         |                   |              |                   |                  |
| ≥ 72.3                    | 34              | 23            | 67.65         | 1.105     | 6.079e-01     | 2.008         | 7.440e-01      | 0.79             | 5.935e-01         | 1.552             |              |                   |                  |
| <b>Profile Likelihood</b> |                 |               |               |           |               |               |                |                  |                   |                   |              |                   |                  |
| < 37.0                    | 21              | 15            | 71.43         | ----      | ----          | ----          | ----           | 0.85             | 7.251e-01         | 1.697             | 8.28e-02     | 6.69e-02          | 2.59e-02         |
| ≥ 37.0                    | 78              | 48            | 61.54         | 5.740e-01 | 3.148e-01     | 1.047         | 7.011e-02      | 1.13             | 9.386e-01         | 2.045             |              |                   |                  |
| <b>Quantitative</b>       | 99              | 63            | 63.64         | 1.002     | 0.9967        | 1.007         | 4.617e-01      |                  |                   |                   | 4.725e-01    | 4.614e-01         |                  |

**Cohort: Validation**

**Outcome: Progression Free Survival by DLCO ( Lung Transplant is Censored )**

**Predictor: Age (years)**

|                           | Patients<br>(N) | Events<br>(n) | Events<br>(%) | HR    | HR<br>95% LCL | HR<br>95% UCL | Wald<br>pvalue | Median<br>(yrs.) | Median<br>95% LCL | Median<br>95% UCL | LR<br>pvalue | Logrank<br>pvalue | DevLIN<br>pvalue |
|---------------------------|-----------------|---------------|---------------|-------|---------------|---------------|----------------|------------------|-------------------|-------------------|--------------|-------------------|------------------|
| <b>Quintiles</b>          |                 |               |               |       |               |               |                |                  |                   |                   |              |                   |                  |
| < 61.6                    | 19              | 9             | 47.37         | ----  | ----          | ----          | ----           | 2.09             | 9.495e-01         |                   | 6.29e-02     | 8.91e-02          | 2.78e-01         |
| [ 61.6,66.5)              | 20              | 12            | 60.00         | 3.050 | 1.254         | 7.421         | 1.395e-02      | 0.77             | 5.471e-01         |                   |              |                   |                  |
| [ 66.5,70.1)              | 20              | 16            | 80.00         | 2.265 | 9.862e-01     | 5.200         | 5.395e-02      | 0.98             | 6.265e-01         |                   |              |                   |                  |
| [ 70.1,77.1)              | 20              | 16            | 80.00         | 2.148 | 9.383e-01     | 4.916         | 7.039e-02      | 1.12             | 7.990e-01         |                   |              |                   |                  |
| ≥ 77.1                    | 20              | 18            | 90.00         | 2.888 | 1.260         | 6.615         | 1.217e-02      | 0.90             | 7.934e-01         | 1.552             |              |                   |                  |
| <b>Quartiles</b>          |                 |               |               |       |               |               |                |                  |                   |                   |              |                   |                  |
| < 62.8                    | 24              | 11            | 45.83         | ----  | ----          | ----          | ----           | 2.09             | 7.661e-01         |                   | 3.96e-02     | 4.86e-02          | 1.17e-01         |
| [ 62.8,68.4)              | 25              | 18            | 72.00         | 2.903 | 1.347         | 6.253         | 6.494e-03      | 0.77             | 5.471e-01         | 1.470             |              |                   |                  |
| [ 68.4,75)                | 25              | 20            | 80.00         | 1.995 | 9.434e-01     | 4.217         | 7.069e-02      | 0.99             | 7.990e-01         | 1.322             |              |                   |                  |
| ≥ 75                      | 25              | 22            | 88.00         | 2.098 | 1.005         | 4.379         | 4.840e-02      | 1.02             | 8.235e-01         | 1.514             |              |                   |                  |
| <b>Tertiles</b>           |                 |               |               |       |               |               |                |                  |                   |                   |              |                   |                  |
| < 65.3                    | 33              | 18            | 54.55         | ----  | ----          | ----          | ----           | 1.18             | 7.661e-01         |                   | 1.67e-01     | 1.81e-01          | 5.76e-01         |
| [ 65.3,72.8)              | 33              | 25            | 75.76         | 1.680 | 9.069e-01     | 3.113         | 9.908e-02      | 0.98             | 6.265e-01         | 1.130             |              |                   |                  |
| ≥ 72.8                    | 33              | 28            | 84.85         | 1.635 | 8.982e-01     | 2.976         | 1.077e-01      | 0.94             | 7.990e-01         | 1.511             |              |                   |                  |
| <b>Profile Likelihood</b> |                 |               |               |       |               |               |                |                  |                   |                   |              |                   |                  |
| <62.8                     | 24              | 11            | 45.83         | ----  | ----          | ----          | ----           | 2.09             | 7.661e-01         |                   | 8.62e-03     | 1.32e-02          | 8.64e-02         |
| ≥62.8                     | 75              | 60            | 80.00         | 2.238 | 1.165         | 4.299         | 1.564e-02      | 0.94             | 8.127e-01         | 1.130             |              |                   |                  |
| <b>Quantitative</b>       |                 |               |               |       |               |               |                |                  |                   |                   |              |                   |                  |
|                           | 99              | 71            | 71.72         | 1.028 | 9.997e-01     | 1.057         | 5.282e-02      |                  |                   |                   | 4.643e-02    | 5.246e-02         |                  |
| <b>Predictor: Gender</b>  |                 |               |               |       |               |               |                |                  |                   |                   |              |                   |                  |
| Female                    | 34              | 22            | 64.71         | ----  | ----          | ----          | ----           | 1.13             | 0.977             | 2.37              |              |                   |                  |
| Male                      | 65              | 49            | 75.38         | 1.64  | 0.983         | 2.728         | 5.81E-02       | 0.85             | 0.766             | 1.19              | 5.20E-02     | 5.53E-02          |                  |

**Cohort: Validation**  
**Outcome: Progression Free Survival by DLCO ( Lung Transplant is Censored )**  
**Predictor: Baseline (4-month) FVC % Predicted**

|                           | Patients<br>(N) | Events<br>(n) | Events<br>(%) | HR        | HR<br>95% LCL | HR<br>95% UCL | Wald<br>pvalue | Median<br>(yrs.) | Median<br>95% LCL | Median<br>95% UCL | LR<br>pvalue | Logrank<br>pvalue | DevLIN<br>pvalue |
|---------------------------|-----------------|---------------|---------------|-----------|---------------|---------------|----------------|------------------|-------------------|-------------------|--------------|-------------------|------------------|
| <b>Quintiles</b>          |                 |               |               |           |               |               |                |                  |                   |                   |              |                   |                  |
| < 48.7                    | 18              | 14            | 77.78         | ----      | ----          | ----          | ----           | 0.95             | 6.265e-01         |                   | 5.66e-02     | 4.98e-02          | 1.85e-01         |
| [ 48.7,54.9)              | 16              | 12            | 75.00         | 9.388e-01 | 4.338e-01     | 2.032         | 8.725e-01      | 0.90             | 6.647e-01         |                   |              |                   |                  |
| [ 54.9,62)                | 17              | 16            | 94.12         | 1.738     | 8.300e-01     | 3.639         | 1.427e-01      | 0.77             | 4.787e-01         | 1.117             |              |                   |                  |
| [ 62,77.2)                | 17              | 12            | 70.59         | 8.987e-01 | 4.105e-01     | 1.967         | 7.893e-01      | 1.13             | 7.661e-01         |                   |              |                   |                  |
| ≥ 77.2                    | 18              | 10            | 55.56         | 4.986e-01 | 2.144e-01     | 1.160         | 1.060e-01      | 1.51             | 8.346e-01         |                   |              |                   |                  |
| <b>Quartiles</b>          |                 |               |               |           |               |               |                |                  |                   |                   |              |                   |                  |
| < 49.7                    | 21              | 17            | 80.95         | ----      | ----          | ----          | ----           | 0.99             | 6.265e-01         | 2.094             | 8.52e-02     | 1.02e-01          | 3.07e-01         |
| [ 49.7,58.2)              | 22              | 18            | 81.82         | 1.309     | 6.722e-01     | 2.550         | 4.283e-01      | 0.82             | 5.471e-01         | 1.127             |              |                   |                  |
| [ 58.2,72.6)              | 22              | 16            | 72.73         | 1.111     | 5.554e-01     | 2.223         | 7.657e-01      | 0.82             | 7.251e-01         |                   |              |                   |                  |
| ≥ 72.6                    | 21              | 13            | 61.90         | 5.395e-01 | 2.566e-01     | 1.134         | 1.036e-01      | 1.51             | 9.768e-01         |                   |              |                   |                  |
| <b>Tertiles</b>           |                 |               |               |           |               |               |                |                  |                   |                   |              |                   |                  |
| < 51.8                    | 28              | 21            | 75.00         | ----      | ----          | ----          | ----           | 1.01             | 6.265e-01         | 1.609             | 7.08e-03     | 5.63e-03          | 2.90e-02         |
| [ 51.8,67.6)              | 30              | 25            | 83.33         | 1.735     | 9.530e-01     | 3.157         | 7.149e-02      | 0.77             | 6.647e-01         | 9.358e-01         |              |                   |                  |
| ≥ 67.6                    | 28              | 18            | 64.29         | 6.293e-01 | 3.277e-01     | 1.208         | 1.642e-01      | 1.47             | 9.768e-01         |                   |              |                   |                  |
| <b>Profile Likelihood</b> |                 |               |               |           |               |               |                |                  |                   |                   |              |                   |                  |
| < 69.0                    | 59              | 47            | 79.66         | ----      | ----          | ----          | ----           | 0.82             | 6.895e-01         | 1.007             | 4.87e-03     | 6.42e-03          | 1.16e-02         |
| ≥ 69.0                    | 27              | 17            | 62.96         | 4.527e-01 | 2.523e-01     | 8.123e-01     | 7.883e-03      | 1.51             | 9.768e-01         |                   |              |                   |                  |
| <b>Quantitative</b>       |                 |               |               |           |               |               |                |                  |                   |                   |              |                   |                  |
|                           | 86              | 64            | 74.42         | 9.882e-01 | 9.749e-01     | 1.002         | 8.522e-02      |                  |                   |                   | 8.266e-02    | 8.416e-02         |                  |

**Cohort: Validation**

**Outcome: Progression Free Survival by DLCO ( Lung Transplant is Censored )**

**Predictor: Baseline (4-month) DLco % Predicted**

|                           | Patients<br>(N) | Events<br>(n) | Events<br>(%) | HR        | HR<br>95% LCL | HR<br>95% UCL | Wald<br>pvalue | Median<br>(yrs.) | Median<br>95% LCL | Median<br>95% UCL | LR<br>pvalue | Logrank<br>pvalue | DevLIN<br>pvalue |
|---------------------------|-----------------|---------------|---------------|-----------|---------------|---------------|----------------|------------------|-------------------|-------------------|--------------|-------------------|------------------|
| <b>Quintiles</b>          |                 |               |               |           |               |               |                |                  |                   |                   |              |                   |                  |
| < 30.1                    | 17              | 11            | 64.71         | ----      | ----          | ----          | ----           | 0.59             | 3.363e-01         |                   | 5.68e-01     | 5.22e-01          | 5.50e-01         |
| [ 30.1,38.8)              | 15              | 12            | 80.00         | 6.262e-01 | 2.737e-01     | 1.433         | 2.677e-01      | 1.01             | 7.661e-01         |                   |              |                   |                  |
| [ 38.8,46)                | 16              | 11            | 68.75         | 5.265e-01 | 2.260e-01     | 1.227         | 1.371e-01      | 1.40             | 7.660e-01         |                   |              |                   |                  |
| [ 46,62.2)                | 16              | 12            | 75.00         | 5.181e-01 | 2.267e-01     | 1.184         | 1.189e-01      | 0.98             | 7.661e-01         |                   |              |                   |                  |
| ≥ 62.2                    | 17              | 14            | 82.35         | 6.941e-01 | 3.086e-01     | 1.561         | 3.772e-01      | 0.90             | 5.800e-01         |                   |              |                   |                  |
| <b>Quartiles</b>          |                 |               |               |           |               |               |                |                  |                   |                   |              |                   |                  |
| < 31.7                    | 21              | 13            | 61.90         | ----      | ----          | ----          | ----           | 0.99             | 4.349e-01         |                   | 5.12e-01     | 5.11e-01          | 2.26e-01         |
| [ 31.7,43.7)              | 19              | 15            | 78.95         | 1.307     | 6.185e-01     | 2.761         | 4.834e-01      | 0.94             | 6.647e-01         |                   |              |                   |                  |
| [ 43.7,56.5)              | 20              | 15            | 75.00         | 7.507e-01 | 3.558e-01     | 1.584         | 4.517e-01      | 1.40             | 7.661e-01         |                   |              |                   |                  |
| ≥ 56.5                    | 21              | 17            | 80.95         | 1.048     | 4.985e-01     | 2.201         | 9.024e-01      | 0.90             | 5.800e-01         |                   |              |                   |                  |
| <b>Tertiles</b>           |                 |               |               |           |               |               |                |                  |                   |                   |              |                   |                  |
| < 34.6                    | 27              | 19            | 70.37         | ----      | ----          | ----          | ----           | 0.83             | 3.471e-01         | 1.415             | 5.65e-01     | 5.50e-01          | 7.37e-01         |
| [ 34.6,47.8)              | 27              | 21            | 77.78         | 7.329e-01 | 3.927e-01     | 1.368         | 3.289e-01      | 0.98             | 8.235e-01         | 1.913             |              |                   |                  |
| ≥ 47.8                    | 27              | 20            | 74.07         | 7.414e-01 | 3.906e-01     | 1.407         | 3.600e-01      | 0.90             | 6.895e-01         | 1.552             |              |                   |                  |
| <b>Profile Likelihood</b> |                 |               |               |           |               |               |                |                  |                   |                   |              |                   |                  |
| < 41.7                    | 38              | 27            | 71.05         | ----      | ----          | ----          | ----           | 0.94             | 5.935e-01         | 1.180             | 1.32e-01     | 1.26e-01          | 1.58e-01         |
| ≥ 41.7                    | 43              | 33            | 76.74         | 6.693e-01 | 3.984e-01     | 1.124         | 1.293e-01      | 1.08             | 8.236e-01         | 1.563             |              |                   |                  |
| <b>Quantitative</b>       | 81              | 60            | 74.07         | 9.947e-01 | 9.806e-01     | 1.009         | 4.680e-01      |                  |                   |                   | 4.618e-01    | 4.678e-01         |                  |

**Cohort: Validation**  
**Outcome: Progression Free Survival by DLCO ( Lung Transplant is Censored )**  
**Predictor: Baseline (4-month) CPI**

|                           | Patients<br>(N) | Events<br>(n) | Events<br>(%) | HR        | HR<br>95% LCL | HR<br>95% UCL | Wald<br>pvalue | Median<br>(yrs.) | Median<br>95% LCL | Median<br>95% UCL | LR<br>pvalue | Logrank<br>pvalue | DevLIN<br>pvalue |
|---------------------------|-----------------|---------------|---------------|-----------|---------------|---------------|----------------|------------------|-------------------|-------------------|--------------|-------------------|------------------|
| <b>Quintiles</b>          |                 |               |               |           |               |               |                |                  |                   |                   |              |                   |                  |
| < 41.2                    | 17              | 13            | 76.47         | ----      | ----          | ----          | ----           | 1.08             | 8.127e-01         |                   | 9.24e-01     | 9.20e-01          | 6.22e-01         |
| [ 41.2,50.9)              | 15              | 11            | 73.33         | 9.450e-01 | 4.136e-01     | 2.159         | 8.933e-01      | 0.98             | 8.236e-01         |                   |              |                   |                  |
| [ 50.9,59.1)              | 17              | 12            | 70.59         | 1.055     | 4.730e-01     | 2.351         | 8.966e-01      | 0.83             | 7.251e-01         |                   |              |                   |                  |
| [ 59.1,65.3)              | 16              | 13            | 81.25         | 1.212     | 5.486e-01     | 2.679         | 6.343e-01      | 0.95             | 5.935e-01         |                   |              |                   |                  |
| ≥ 65.3                    | 16              | 11            | 68.75         | 1.342     | 5.872e-01     | 3.068         | 4.853e-01      | 0.99             | 3.363e-01         |                   |              |                   |                  |
| <b>Quartiles</b>          |                 |               |               |           |               |               |                |                  |                   |                   |              |                   |                  |
| < 44.4                    | 21              | 15            | 71.43         | ----      | ----          | ----          | ----           | 1.08             | 5.800e-01         |                   | 6.51e-01     | 6.46e-01          | 9.60e-01         |
| [ 44.4,55.5)              | 19              | 14            | 73.68         | 1.034     | 4.923e-01     | 2.173         | 9.289e-01      | 0.98             | 8.236e-01         |                   |              |                   |                  |
| [ 55.5,64.1)              | 21              | 16            | 76.19         | 1.357     | 6.589e-01     | 2.794         | 4.077e-01      | 0.94             | 7.251e-01         |                   |              |                   |                  |
| ≥ 64.1                    | 20              | 15            | 75.00         | 1.483     | 7.114e-01     | 3.091         | 2.931e-01      | 0.99             | 3.363e-01         | 1.415             |              |                   |                  |
| <b>Tertiles</b>           |                 |               |               |           |               |               |                |                  |                   |                   |              |                   |                  |
| < 49.9                    | 27              | 19            | 70.37         | ----      | ----          | ----          | ----           | 1.13             | 8.236e-01         | 2.198             | 3.82e-01     | 3.74e-01          | 8.76e-01         |
| [ 49.9,60.6)              | 27              | 21            | 77.78         | 1.227     | 6.521e-01     | 2.308         | 5.260e-01      | 0.83             | 7.660e-01         | 1.913             |              |                   |                  |
| ≥ 60.6                    | 27              | 20            | 74.07         | 1.573     | 8.291e-01     | 2.986         | 1.656e-01      | 0.95             | 4.349e-01         | 1.415             |              |                   |                  |
| <b>Profile Likelihood</b> |                 |               |               |           |               |               |                |                  |                   |                   |              |                   |                  |
| <59.8                     | 52              | 38            | 73.08         | ----      | ----          | ----          | ----           | 0.98             | 8.236e-01         | 1.552             | 1.09e-01     | 9.78e-02          | 3.35e-01         |
| ≥59.8                     | 29              | 22            | 75.86         | 1.560     | 9.162e-01     | 2.657         | 1.015e-01      | 0.94             | 4.349e-01         | 1.180             |              |                   |                  |
| <b>Quantitative</b>       | 81              | 60            | 74.07         | 1.013     | 9.932e-01     | 1.033         | 2.012e-01      |                  |                   |                   | 1.916e-01    | 2.003e-01         |                  |



**Cohort: Validation**  
**Outcome: Progression Free Survival by DLCO ( Lung Transplant is Censored )**  
**Predictor: Baseline (3-month) FVC % Predicted**

|                           | Patients<br>(N) | Events<br>(n) | Events<br>(%) | HR        | HR<br>95% LCL | HR<br>95% UCL | Wald<br>pvalue | Median<br>(yrs.) | Median<br>95% LCL | Median<br>95% UCL | LR<br>pvalue | Logrank<br>pvalue | DevLIN<br>pvalue |
|---------------------------|-----------------|---------------|---------------|-----------|---------------|---------------|----------------|------------------|-------------------|-------------------|--------------|-------------------|------------------|
| <b>Quintiles</b>          |                 |               |               |           |               |               |                |                  |                   |                   |              |                   |                  |
| < 48.9                    | 15              | 11            | 73.33         | ----      | ----          | ----          | ----           | 0.95             | 5.935e-01         |                   | 1.68e-01     | 1.57e-01          | 4.22e-01         |
| [ 48.9,55.7)              | 14              | 10            | 71.43         | 8.946e-01 | 3.790e-01     | 2.112         | 7.993e-01      | 1.12             | 4.787e-01         |                   |              |                   |                  |
| [ 55.7,62)                | 13              | 12            | 92.31         | 1.522     | 6.605e-01     | 3.506         | 3.242e-01      | 0.82             | 3.993e-01         |                   |              |                   |                  |
| [ 62,76.7)                | 16              | 11            | 68.75         | 7.773e-01 | 3.328e-01     | 1.816         | 5.606e-01      | 1.40             | 7.661e-01         |                   |              |                   |                  |
| ≥ 76.7                    | 15              | 9             | 60.00         | 4.880e-01 | 1.950e-01     | 1.222         | 1.254e-01      | 1.51             | 8.127e-01         |                   |              |                   |                  |
| <b>Quartiles</b>          |                 |               |               |           |               |               |                |                  |                   |                   |              |                   |                  |
| < 49.7                    | 18              | 14            | 77.78         | ----      | ----          | ----          | ----           | 0.99             | 6.265e-01         | 2.094             | 8.71e-02     | 7.83e-02          | 2.52e-01         |
| [ 49.7,58.8)              | 18              | 14            | 77.78         | 1.710     | 8.028e-01     | 3.642         | 1.643e-01      | 0.82             | 4.787e-01         | 1.127             |              |                   |                  |
| [ 58.8,73.3)              | 19              | 13            | 68.42         | 1.049     | 4.870e-01     | 2.260         | 9.024e-01      | 0.86             | 7.251e-01         |                   |              |                   |                  |
| ≥ 73.3                    | 18              | 12            | 66.67         | 5.986e-01 | 2.706e-01     | 1.324         | 2.051e-01      | 1.51             | 9.768e-01         |                   |              |                   |                  |
| <b>Tertiles</b>           |                 |               |               |           |               |               |                |                  |                   |                   |              |                   |                  |
| < 51.8                    | 24              | 17            | 70.83         | ----      | ----          | ----          | ----           | 1.01             | 7.934e-01         | 2.094             | 6.73e-03     | 4.69e-03          | 2.04e-02         |
| [ 51.8,68.1)              | 25              | 20            | 80.00         | 1.979     | 9.990e-01     | 3.920         | 5.032e-02      | 0.77             | 4.787e-01         | 1.117             |              |                   |                  |
| ≥ 68.1                    | 24              | 16            | 66.67         | 6.315e-01 | 3.107e-01     | 1.283         | 2.040e-01      | 1.51             | 9.768e-01         |                   |              |                   |                  |
| <b>Profile Likelihood</b> |                 |               |               |           |               |               |                |                  |                   |                   |              |                   |                  |
| < 68.3                    | 49              | 37            | 75.51         | ----      | ----          | ----          | ----           | 0.85             | 7.251e-01         | 1.127             | 1.33e-02     | 1.56e-02          | 3.92e-02         |
| ≥ 68.3                    | 24              | 16            | 66.67         | 4.729e-01 | 2.543e-01     | 8.796e-01     | 1.803e-02      | 1.51             | 9.768e-01         |                   |              |                   |                  |
| <b>Quantitative</b>       |                 |               |               |           |               |               |                |                  |                   |                   |              |                   |                  |
|                           | 73              | 53            | 72.60         | 9.882e-01 | 9.740e-01     | 1.003         | 1.097e-01      |                  |                   |                   | 1.084e-01    | 1.085e-01         |                  |

**Cohort: Validation**

**Outcome: Progression Free Survival by DLCO ( Lung Transplant is Censored )**

**Predictor: Baseline (3-month) DLco % Predicted**

|                           | Patients<br>(N) | Events<br>(n) | Events<br>(%) | HR        | HR<br>95% LCL | HR<br>95% UCL | Wald<br>pvalue | Median<br>(yrs.) | Median<br>95% LCL | Median<br>95% UCL | LR<br>pvalue | Logrank<br>pvalue | DevLIN<br>pvalue |
|---------------------------|-----------------|---------------|---------------|-----------|---------------|---------------|----------------|------------------|-------------------|-------------------|--------------|-------------------|------------------|
| <b>Quintiles</b>          |                 |               |               |           |               |               |                |                  |                   |                   |              |                   |                  |
| < 28.6                    | 14              | 9             | 64.29         | ----      | ----          | ----          | ----           | 0.99             | 3.363e-01         |                   | 6.64e-01     | 6.40e-01          | 6.57e-01         |
| [ 28.6,38.3)              | 13              | 9             | 69.23         | 6.886e-01 | 2.708e-01     | 1.751         | 4.333e-01      | 1.01             | 3.637e-01         |                   |              |                   |                  |
| [ 38.3,46)                | 13              | 9             | 69.23         | 4.973e-01 | 1.950e-01     | 1.269         | 1.437e-01      | 1.48             | 9.358e-01         |                   |              |                   |                  |
| [ 46,61.3)                | 14              | 11            | 78.57         | 5.804e-01 | 2.386e-01     | 1.412         | 2.303e-01      | 0.98             | 7.661e-01         |                   |              |                   |                  |
| ≥ 61.3                    | 14              | 12            | 85.71         | 7.214e-01 | 2.958e-01     | 1.760         | 4.729e-01      | 0.86             | 5.800e-01         |                   |              |                   |                  |
| <b>Quartiles</b>          |                 |               |               |           |               |               |                |                  |                   |                   |              |                   |                  |
| < 30.9                    | 18              | 10            | 55.56         | ----      | ----          | ----          | ----           | 1.12             | 4.349e-01         |                   | 9.79e-01     | 9.79e-01          | 3.61e-01         |
| [ 30.9,43.8)              | 16              | 12            | 75.00         | 1.068     | 4.587e-01     | 2.485         | 8.794e-01      | 0.95             | 8.235e-01         |                   |              |                   |                  |
| [ 43.8,55.1)              | 16              | 13            | 81.25         | 9.254e-01 | 4.049e-01     | 2.115         | 8.541e-01      | 1.40             | 7.661e-01         |                   |              |                   |                  |
| ≥ 55.1                    | 18              | 15            | 83.33         | 1.078     | 4.744e-01     | 2.450         | 8.577e-01      | 0.86             | 6.265e-01         |                   |              |                   |                  |
| <b>Tertiles</b>           |                 |               |               |           |               |               |                |                  |                   |                   |              |                   |                  |
| < 33.8                    | 22              | 14            | 63.64         | ----      | ----          | ----          | ----           | 1.01             | 3.471e-01         |                   | 9.15e-01     | 9.14e-01          | 9.33e-01         |
| [ 33.8,47.4)              | 24              | 19            | 79.17         | 8.829e-01 | 4.408e-01     | 1.768         | 7.251e-01      | 0.98             | 8.235e-01         | 1.913             |              |                   |                  |
| ≥ 47.4                    | 22              | 17            | 77.27         | 8.648e-01 | 4.189e-01     | 1.785         | 6.945e-01      | 1.08             | 6.895e-01         | 1.552             |              |                   |                  |
| <b>Profile Likelihood</b> |                 |               |               |           |               |               |                |                  |                   |                   |              |                   |                  |
| < 30.1                    | 16              | 10            | 62.50         | ----      | ----          | ----          | ----           | 0.99             | 3.363e-01         |                   | 1.92e-01     | 1.68e-01          | 2.35e-01         |
| ≥ 30.1                    | 52              | 40            | 76.92         | 6.119e-01 | 3.025e-01     | 1.238         | 1.717e-01      | 1.01             | 8.236e-01         | 1.514             |              |                   |                  |
| <b>Quantitative</b>       |                 |               |               |           |               |               |                |                  |                   |                   |              |                   |                  |
|                           | 68              | 50            | 73.53         | 9.955e-01 | 9.802e-01     | 1.011         | 5.679e-01      |                  |                   |                   | 5.634e-01    | 5.677e-01         |                  |

**Cohort: Validation**  
**Outcome: Progression Free Survival by DLCO ( Lung Transplant is Censored )**  
**Predictor: Baseline (3-month) CPI**

|                           | Patients<br>(N) | Events<br>(n) | Events<br>(%) | HR        | HR<br>95% LCL | HR<br>95% UCL | Wald<br>pvalue | Median<br>(yrs.) | Median<br>95% LCL | Median<br>95% UCL | LR<br>pvalue | Logrank<br>pvalue | DevLIN<br>pvalue |
|---------------------------|-----------------|---------------|---------------|-----------|---------------|---------------|----------------|------------------|-------------------|-------------------|--------------|-------------------|------------------|
| <b>Quintiles</b>          |                 |               |               |           |               |               |                |                  |                   |                   |              |                   |                  |
| < 42.9                    | 14              | 12            | 85.71         | ----      | ----          | ----          | ----           | 0.86             | 5.800e-01         |                   | 2.52e-01     | 2.09e-01          | 3.29e-02         |
| [ 42.9,51.7)              | 13              | 9             | 69.23         | 6.882e-01 | 2.805e-01     | 1.688         | 4.143e-01      | 1.51             | 8.538e-01         |                   |              |                   |                  |
| [ 51.7,59.8)              | 14              | 9             | 64.29         | 6.163e-01 | 2.536e-01     | 1.498         | 2.853e-01      | 1.40             | 7.660e-01         |                   |              |                   |                  |
| [ 59.8,66)                | 14              | 12            | 85.71         | 1.588     | 6.901e-01     | 3.655         | 2.767e-01      | 0.82             | 3.637e-01         |                   |              |                   |                  |
| ≥ 66                      | 13              | 8             | 61.54         | 9.232e-01 | 3.665e-01     | 2.326         | 8.655e-01      | 1.12             | 3.363e-01         |                   |              |                   |                  |
| <b>Quartiles</b>          |                 |               |               |           |               |               |                |                  |                   |                   |              |                   |                  |
| < 45.4                    | 18              | 14            | 77.78         | ----      | ----          | ----          | ----           | 1.13             | 8.127e-01         |                   | 6.37e-01     | 6.21e-01          | 9.26e-01         |
| [ 45.4,56)                | 16              | 12            | 75.00         | 1.162     | 5.289e-01     | 2.553         | 7.084e-01      | 0.98             | 7.661e-01         |                   |              |                   |                  |
| [ 56,64.8)                | 17              | 12            | 70.59         | 1.299     | 5.888e-01     | 2.865         | 5.171e-01      | 0.95             | 7.251e-01         |                   |              |                   |                  |
| ≥ 64.8                    | 17              | 12            | 70.59         | 1.683     | 7.626e-01     | 3.712         | 1.975e-01      | 0.99             | 3.363e-01         |                   |              |                   |                  |
| <b>Tertiles</b>           |                 |               |               |           |               |               |                |                  |                   |                   |              |                   |                  |
| < 50.3                    | 22              | 17            | 77.27         | ----      | ----          | ----          | ----           | 1.47             | 8.236e-01         | 2.198             | 4.78e-01     | 4.73e-01          | 8.83e-01         |
| [ 50.3,62.2)              | 24              | 18            | 75.00         | 1.249     | 6.353e-01     | 2.455         | 5.195e-01      | 0.95             | 7.660e-01         | 1.609             |              |                   |                  |
| ≥ 62.2                    | 22              | 15            | 68.18         | 1.554     | 7.638e-01     | 3.162         | 2.238e-01      | 0.99             | 4.349e-01         | 2.094             |              |                   |                  |
| <b>Profile Likelihood</b> |                 |               |               |           |               |               |                |                  |                   |                   |              |                   |                  |
| <59.8                     | 41              | 30            | 73.17         | ----      | ----          | ----          | ----           | 1.13             | 8.236e-01         | 1.609             | 9.78e-02     | 8.87e-02          | 2.18e-01         |
| ≥59.8                     | 27              | 20            | 74.07         | 1.642     | 9.223e-01     | 2.925         | 9.192e-02      | 0.94             | 4.349e-01         | 1.180             |              |                   |                  |
| <b>Quantitative</b>       |                 |               |               |           |               |               |                |                  |                   |                   |              |                   |                  |
|                           | 68              | 50            | 73.53         | 1.012     | 9.907e-01     | 1.033         | 2.753e-01      |                  |                   |                   | 2.656e-01    | 2.745e-01         |                  |

**Cohort: Validation**

**Outcome: Progression Free Survival by DLCO ( Lung Transplant is Censored )**

**Predictor: MMP7Elisa ( ng / mL )**

|                           | Patients<br>(N) | Events<br>(n) | Events<br>(%) | HR        | HR<br>95% LCL | HR<br>95% UCL | Wald<br>pvalue | Median<br>(yrs.) | Median<br>95% LCL | Median<br>95% UCL | LR<br>pvalue | Logrank<br>pvalue | DevLIN<br>pvalue |
|---------------------------|-----------------|---------------|---------------|-----------|---------------|---------------|----------------|------------------|-------------------|-------------------|--------------|-------------------|------------------|
| <b>Quintiles</b>          |                 |               |               |           |               |               |                |                  |                   |                   |              |                   |                  |
| < 3.41                    | 19              | 14            | 73.68         | ----      | ----          | ----          | ----           | 0.81             | 6.265e-01         |                   | 9.29e-01     | 9.27e-01          | 6.79e-01         |
| [ 3.41,4.56)              | 19              | 14            | 73.68         | 7.400e-01 | 3.440e-01     | 1.592         | 4.409e-01      | 1.13             | 7.251e-01         |                   |              |                   |                  |
| [ 4.56,5.49)              | 20              | 16            | 80.00         | 8.579e-01 | 4.095e-01     | 1.797         | 6.845e-01      | 0.99             | 9.030e-01         | 2.888             |              |                   |                  |
| [ 5.49,7.52)              | 20              | 14            | 70.00         | 8.529e-01 | 3.964e-01     | 1.835         | 6.839e-01      | 1.01             | 6.647e-01         | 2.094             |              |                   |                  |
| ≥ 7.52                    | 21              | 13            | 61.90         | 7.244e-01 | 3.325e-01     | 1.578         | 4.170e-01      | 1.32             | 8.346e-01         |                   |              |                   |                  |
| <b>Quartiles</b>          |                 |               |               |           |               |               |                |                  |                   |                   |              |                   |                  |
| < 3.54                    | 24              | 17            | 70.83         | ----      | ----          | ----          | ----           | 0.85             | 7.990e-01         |                   | 5.55e-01     | 5.37e-01          | 7.98e-02         |
| [ 3.54,4.94)              | 24              | 19            | 79.17         | 1.510     | 7.698e-01     | 2.961         | 2.306e-01      | 0.90             | 6.895e-01         | 1.913             |              |                   |                  |
| [ 4.94,6.46)              | 25              | 18            | 72.00         | 9.668e-01 | 4.909e-01     | 1.904         | 9.221e-01      | 1.08             | 7.660e-01         |                   |              |                   |                  |
| ≥ 6.46                    | 26              | 17            | 65.38         | 1.139     | 5.732e-01     | 2.263         | 7.104e-01      | 1.18             | 8.235e-01         | 1.552             |              |                   |                  |
| <b>Tertiles</b>           |                 |               |               |           |               |               |                |                  |                   |                   |              |                   |                  |
| < 3.99                    | 33              | 24            | 72.73         | ----      | ----          | ----          | ----           | 0.85             | 7.661e-01         | 1.563             | 6.42e-01     | 6.39e-01          | 4.59e-01         |
| [ 3.99,5.91)              | 32              | 27            | 84.38         | 1.191     | 6.821e-01     | 2.081         | 5.382e-01      | 0.99             | 7.251e-01         | 1.609             |              |                   |                  |
| ≥ 5.91                    | 34              | 20            | 58.82         | 9.083e-01 | 4.974e-01     | 1.659         | 7.542e-01      | 1.19             | 8.235e-01         | 1.552             |              |                   |                  |
| <b>Profile Likelihood</b> |                 |               |               |           |               |               |                |                  |                   |                   |              |                   |                  |
| < 6.1                     | 67              | 52            | 77.61         | ----      | ----          | ----          | ----           | 0.94             | 7.661e-01         | 1.127             | 3.51e-01     | 3.60e-01          | 9.31e-01         |
| ≥ 6.1                     | 32              | 19            | 59.38         | 7.808e-01 | 4.598e-01     | 1.326         | 3.597e-01      | 1.19             | 8.346e-01         | 2.370             |              |                   |                  |
| <b>Quantitative</b>       |                 |               |               |           |               |               |                |                  |                   |                   |              |                   |                  |
|                           | 99              | 71            | 71.72         | 9.520e-01 | 8.807e-01     | 1.029         | 2.150e-01      |                  |                   |                   | 1.878e-01    | 2.137e-01         |                  |

**Cohort: Validation**  
**Outcome: Progression Free Survival by DLCO ( Lung Transplant is Censored )**  
**Predictor: ICAM ( ng / mL )**

|                           | Patients<br>(N) | Events<br>(n) | Events<br>(%) | HR    | HR<br>95% LCL | HR<br>95% UCL | Wald<br>pvalue | Median<br>(yrs.) | Median<br>95% LCL | Median<br>95% UCL | LR<br>pvalue | Logrank<br>pvalue | DevLIN<br>pvalue |
|---------------------------|-----------------|---------------|---------------|-------|---------------|---------------|----------------|------------------|-------------------|-------------------|--------------|-------------------|------------------|
| <b>Quintiles</b>          |                 |               |               |       |               |               |                |                  |                   |                   |              |                   |                  |
| < 226                     | 20              | 12            | 60.00         | ----  | ----          | ----          | ----           | 1.01             | 8.235e-01         |                   | 2.25e-01     | 1.60e-01          | 1.43e-01         |
| [ 226,281)                | 20              | 17            | 85.00         | 1.284 | 6.007e-01     | 2.744         | 5.190e-01      | 1.02             | 8.236e-01         | 2.198             |              |                   |                  |
| [ 281,326)                | 18              | 12            | 66.67         | 1.204 | 5.245e-01     | 2.762         | 6.620e-01      | 0.77             | 4.513e-01         |                   |              |                   |                  |
| [ 326,419)                | 20              | 15            | 75.00         | 2.396 | 1.084         | 5.297         | 3.090e-02      | 0.73             | 4.759e-01         | 1.511             |              |                   |                  |
| ≥ 419                     | 21              | 15            | 71.43         | 1.112 | 5.060e-01     | 2.443         | 7.918e-01      | 1.47             | 9.495e-01         | 2.335             |              |                   |                  |
| <b>Quartiles</b>          |                 |               |               |       |               |               |                |                  |                   |                   |              |                   |                  |
| < 238                     | 25              | 16            | 64.00         | ----  | ----          | ----          | ----           | 0.98             | 8.235e-01         |                   | 4.25e-01     | 3.85e-01          | 2.85e-01         |
| [ 238,303)                | 24              | 18            | 75.00         | 1.081 | 5.439e-01     | 2.148         | 8.241e-01      | 1.02             | 8.236e-01         |                   |              |                   |                  |
| [ 303,387)                | 24              | 18            | 75.00         | 1.723 | 8.620e-01     | 3.444         | 1.236e-01      | 0.66             | 4.513e-01         | 1.514             |              |                   |                  |
| ≥ 387                     | 26              | 19            | 73.08         | 1.160 | 5.854e-01     | 2.298         | 6.708e-01      | 1.19             | 7.934e-01         | 2.094             |              |                   |                  |
| <b>Tertiles</b>           |                 |               |               |       |               |               |                |                  |                   |                   |              |                   |                  |
| < 258                     | 34              | 24            | 70.59         | ----  | ----          | ----          | ----           | 1.08             | 8.346e-01         | 2.198             | 3.71e-01     | 3.76e-01          | 3.69e-01         |
| [ 258,367)                | 31              | 22            | 70.97         | 1.515 | 8.335e-01     | 2.753         | 1.731e-01      | 0.77             | 5.800e-01         | 1.322             |              |                   |                  |
| ≥ 367                     | 34              | 25            | 73.53         | 1.324 | 7.436e-01     | 2.357         | 3.403e-01      | 1.19             | 7.934e-01         | 1.563             |              |                   |                  |
| <b>Profile Likelihood</b> |                 |               |               |       |               |               |                |                  |                   |                   |              |                   |                  |
| <291.7                    | 45              | 31            | 68.89         | ----  | ----          | ----          | ----           | 1.02             | 8.620e-01         | 1.913             | 9.88e-02     | 9.90e-02          | 3.61e-02         |
| ≥291.7                    | 54              | 40            | 74.07         | 1.495 | 9.241e-01     | 2.420         | 1.013e-01      | 0.85             | 6.265e-01         | 1.470             |              |                   |                  |
| <b>Quantitative</b>       | 99              | 71            | 71.72         | 1.001 | 0.9985        | 1.003         | 6.001e-01      |                  |                   |                   | 6.017e-01    | 5.999e-01         |                  |

Cohort: **Validation**

Outcome: **Progression Free Survival by DLCO ( Lung Transplant is Censored )**

Predictor: **IL8 ( ng / mL )**

|                           | Patients<br>(N) | Events<br>(n) | Events<br>(%) | HR    | HR<br>95% LCL | HR<br>95% UCL | Wald<br>pvalue | Median<br>(yrs.) | Median<br>95% LCL | Median<br>95% UCL | LR<br>pvalue | Logrank<br>pvalue | DevLIN<br>pvalue |
|---------------------------|-----------------|---------------|---------------|-------|---------------|---------------|----------------|------------------|-------------------|-------------------|--------------|-------------------|------------------|
| <b>Quintiles</b>          |                 |               |               |       |               |               |                |                  |                   |                   |              |                   |                  |
| < 0.00767                 | 19              | 12            | 63.16         | ----  | ----          | ----          | ----           | 1.40             | 7.660e-01         |                   | 1.93e-01     | 2.02e-01          | 3.87e-01         |
| [ 0.00767,0.0101)         | 20              | 13            | 65.00         | 1.959 | 8.321e-01     | 4.610         | 1.238e-01      | 1.01             | 7.934e-01         |                   |              |                   |                  |
| [ 0.0101,0.0131)          | 18              | 12            | 66.67         | 2.242 | 9.914e-01     | 5.069         | 5.246e-02      | 1.02             | 4.759e-01         |                   |              |                   |                  |
| [ 0.0131,0.0178)          | 20              | 15            | 75.00         | 1.948 | 8.838e-01     | 4.294         | 9.819e-02      | 0.83             | 7.990e-01         | 1.563             |              |                   |                  |
| ≥ 0.0178                  | 20              | 17            | 85.00         | 1.194 | 5.213e-01     | 2.734         | 6.752e-01      | 0.98             | 7.661e-01         | 1.552             |              |                   |                  |
| <b>Quartiles</b>          |                 |               |               |       |               |               |                |                  |                   |                   |              |                   |                  |
| < 0.00825                 | 24              | 16            | 66.67         | ----  | ----          | ----          | ----           | 1.19             | 7.661e-01         |                   | 2.30e-01     | 2.27e-01          | 4.50e-01         |
| [ 0.00825,0.0112)         | 24              | 15            | 62.50         | 2.023 | 9.818e-01     | 4.169         | 5.609e-02      | 1.01             | 7.934e-01         |                   |              |                   |                  |
| [ 0.0112,0.0164)          | 24              | 17            | 70.83         | 1.667 | 8.376e-01     | 3.316         | 1.457e-01      | 0.82             | 4.759e-01         | 1.609             |              |                   |                  |
| ≥ 0.0164                  | 25              | 21            | 84.00         | 1.290 | 6.164e-01     | 2.700         | 4.990e-01      | 0.99             | 9.030e-01         | 1.514             |              |                   |                  |
| <b>Tertiles</b>           |                 |               |               |       |               |               |                |                  |                   |                   |              |                   |                  |
| < 0.00959                 | 32              | 19            | 59.38         | ----  | ----          | ----          | ----           | 1.19             | 8.235e-01         |                   | 3.86e-02     | 4.23e-02          | 8.30e-02         |
| [ 0.00959,0.015)          | 32              | 22            | 68.75         | 2.162 | 1.170         | 3.996         | 1.382e-02      | 1.02             | 5.800e-01         |                   |              |                   |                  |
| ≥ 0.015                   | 33              | 28            | 84.85         | 1.701 | 8.955e-01     | 3.230         | 1.047e-01      | 0.94             | 7.990e-01         | 1.415             |              |                   |                  |
| <b>Profile Likelihood</b> |                 |               |               |       |               |               |                |                  |                   |                   |              |                   |                  |
| <0.01                     | 37              | 23            | 62.16         | ----  | ----          | ----          | ----           | 1.19             | 8.235e-01         |                   | 6.48e-03     | 7.37e-03          | 1.83e-02         |
| ≥0.01                     | 60              | 46            | 76.67         | 2.040 | 1.199         | 3.471         | 8.550e-03      | 0.94             | 7.934e-01         | 1.127             |              |                   |                  |
| <b>Quantitative*</b>      |                 |               |               |       |               |               |                |                  |                   |                   |              |                   |                  |
|                           | 97              | 69            | 71.13         | 1.019 | 9.950e-01     | 1.044         | 1.194e-01      |                  |                   |                   | 1.622e-01    | 1.242e-01         |                  |

\*Units of pg / mL were used in **Quantitative model only**.

**Cohort: Validation**  
**Outcome: Progression Free Survival by DLCO ( Lung Transplant is Censored )**  
**Predictor: VCAM ( ng / mL )**

|                           | Patients<br>(N) | Events<br>(n) | Events<br>(%) | HR        | HR<br>95% LCL | HR<br>95% UCL | Wald<br>pvalue | Median<br>(yrs.) | Median<br>95% LCL | Median<br>95% UCL | LR<br>pvalue | Logrank<br>pvalue | DevLIN<br>pvalue |
|---------------------------|-----------------|---------------|---------------|-----------|---------------|---------------|----------------|------------------|-------------------|-------------------|--------------|-------------------|------------------|
| <b>Quintiles</b>          |                 |               |               |           |               |               |                |                  |                   |                   |              |                   |                  |
| < 222                     | 20              | 12            | 60.00         | ----      | ----          | ----          | ----           | 1.13             | 8.235e-01         |                   | 7.60e-02     | 5.30e-02          | 1.34e-02         |
| [ 222,260)                | 20              | 17            | 85.00         | 2.591     | 1.186         | 5.660         | 1.690e-02      | 0.82             | 4.349e-01         | 9.768e-01         |              |                   |                  |
| [ 260,310)                | 19              | 12            | 63.16         | 1.150     | 5.035e-01     | 2.627         | 7.400e-01      | 1.08             | 9.030e-01         |                   |              |                   |                  |
| [ 310,376)                | 20              | 15            | 75.00         | 1.090     | 4.988e-01     | 2.382         | 8.291e-01      | 1.51             | 7.251e-01         |                   |              |                   |                  |
| ≥ 376                     | 20              | 15            | 75.00         | 1.779     | 8.046e-01     | 3.932         | 1.548e-01      | 0.81             | 5.800e-01         | 1.913             |              |                   |                  |
| <b>Quartiles</b>          |                 |               |               |           |               |               |                |                  |                   |                   |              |                   |                  |
| < 230                     | 25              | 17            | 68.00         | ----      | ----          | ----          | ----           | 1.01             | 8.235e-01         |                   | 2.59e-01     | 2.29e-01          | 2.62e-01         |
| [ 230,285)                | 24              | 20            | 83.33         | 1.745     | 8.768e-01     | 3.474         | 1.128e-01      | 0.90             | 8.236e-01         | 1.117             |              |                   |                  |
| [ 285,358)                | 25              | 17            | 68.00         | 9.064e-01 | 4.546e-01     | 1.807         | 7.802e-01      | 1.51             | 7.251e-01         |                   |              |                   |                  |
| ≥ 358                     | 25              | 17            | 68.00         | 1.072     | 5.406e-01     | 2.124         | 8.430e-01      | 0.98             | 5.935e-01         | 2.335             |              |                   |                  |
| <b>Tertiles</b>           |                 |               |               |           |               |               |                |                  |                   |                   |              |                   |                  |
| < 246                     | 34              | 24            | 70.59         | ----      | ----          | ----          | ----           | 0.83             | 5.471e-01         | 2.198             | 8.73e-01     | 8.70e-01          | 8.64e-01         |
| [ 246,334)                | 32              | 23            | 71.88         | 8.825e-01 | 4.926e-01     | 1.581         | 6.742e-01      | 1.02             | 9.030e-01         | 1.552             |              |                   |                  |
| ≥ 334                     | 33              | 24            | 72.73         | 8.678e-01 | 4.882e-01     | 1.543         | 6.289e-01      | 1.18             | 7.661e-01         | 1.913             |              |                   |                  |
| <b>Profile Likelihood</b> |                 |               |               |           |               |               |                |                  |                   |                   |              |                   |                  |
| <284.7                    | 49              | 37            | 75.51         | ----      | ----          | ----          | ----           | 0.94             | 8.236e-01         | 1.117             | 2.68e-01     | 2.66e-01          | 1.73e-01         |
| ≥284.7                    | 50              | 34            | 68.00         | 7.630e-01 | 4.729e-01     | 1.231         | 2.677e-01      | 1.41             | 7.661e-01         | 1.609             |              |                   |                  |
| <b>Quantitative</b>       | 99              | 71            | 71.72         | 0.9998    | 0.9976        | 1.002         | 8.348e-01      |                  |                   |                   | 8.337e-01    | 8.348e-01         |                  |

Cohort: **Validation**

Outcome: **Progression Free Survival by DLCO ( Lung Transplant is Censored )**

Predictor: **S100A12 ( ng / mL )**

|                           | Patients<br>(N) | Events<br>(n) | Events<br>(%) | HR        | HR<br>95% LCL | HR<br>95% UCL | Wald<br>pvalue | Median<br>(yrs.) | Median<br>95% LCL | Median<br>95% UCL | LR<br>pvalue | Logrank<br>pvalue | DevLIN<br>pvalue |
|---------------------------|-----------------|---------------|---------------|-----------|---------------|---------------|----------------|------------------|-------------------|-------------------|--------------|-------------------|------------------|
| <b>Quintiles</b>          |                 |               |               |           |               |               |                |                  |                   |                   |              |                   |                  |
| < 36.6                    | 20              | 15            | 75.00         | ----      | ----          | ----          | ----           | 0.86             | 6.647e-01         |                   | 2.00e-01     | 1.69e-01          | 1.44e-01         |
| [ 36.6,49.2)              | 19              | 11            | 57.89         | 6.048e-01 | 2.824e-01     | 1.295         | 1.956e-01      | 1.41             | 9.030e-01         |                   |              |                   |                  |
| [ 49.2,65.9)              | 19              | 14            | 73.68         | 5.680e-01 | 2.594e-01     | 1.244         | 1.572e-01      | 0.98             | 7.990e-01         | 2.370             |              |                   |                  |
| [ 65.9,105)               | 20              | 16            | 80.00         | 6.516e-01 | 3.078e-01     | 1.379         | 2.629e-01      | 0.82             | 4.513e-01         | 1.913             |              |                   |                  |
| ≥ 105                     | 21              | 15            | 71.43         | 1.214     | 5.962e-01     | 2.472         | 5.928e-01      | 0.99             | 5.935e-01         |                   |              |                   |                  |
| <b>Quartiles</b>          |                 |               |               |           |               |               |                |                  |                   |                   |              |                   |                  |
| < 39.7                    | 25              | 19            | 76.00         | ----      | ----          | ----          | ----           | 0.90             | 6.647e-01         | 1.470             | 8.78e-01     | 8.78e-01          | 8.81e-01         |
| [ 39.7,54.5)              | 24              | 16            | 66.67         | 7.580e-01 | 3.888e-01     | 1.478         | 4.160e-01      | 1.13             | 8.346e-01         |                   |              |                   |                  |
| [ 54.5,82.8)              | 24              | 16            | 66.67         | 8.855e-01 | 4.531e-01     | 1.730         | 7.220e-01      | 0.98             | 7.661e-01         |                   |              |                   |                  |
| ≥ 82.8                    | 26              | 20            | 76.92         | 8.518e-01 | 4.449e-01     | 1.631         | 6.282e-01      | 0.98             | 7.660e-01         | 2.094             |              |                   |                  |
| <b>Tertiles</b>           |                 |               |               |           |               |               |                |                  |                   |                   |              |                   |                  |
| < 43.9                    | 34              | 24            | 70.59         | ----      | ----          | ----          | ----           | 1.02             | 8.538e-01         | 1.470             | 6.42e-01     | 6.46e-01          | 4.21e-01         |
| [ 43.9,72.3)              | 31              | 21            | 67.74         | 8.148e-01 | 4.486e-01     | 1.480         | 5.010e-01      | 0.98             | 8.236e-01         | 2.335             |              |                   |                  |
| ≥ 72.3                    | 34              | 26            | 76.47         | 1.069     | 6.037e-01     | 1.892         | 8.197e-01      | 0.82             | 5.935e-01         | 1.511             |              |                   |                  |
| <b>Profile Likelihood</b> |                 |               |               |           |               |               |                |                  |                   |                   |              |                   |                  |
| < 37.5                    | 22              | 17            | 77.27         | ----      | ----          | ----          | ----           | 0.86             | 6.647e-01         | 1.470             | 1.60e-01     | 1.44e-01          | 1.39e-01         |
| ≥ 37.5                    | 77              | 54            | 70.13         | 6.588e-01 | 3.746e-01     | 1.159         | 1.474e-01      | 0.99             | 8.235e-01         | 1.511             |              |                   |                  |
| <b>Quantitative</b>       | 99              | 71            | 71.72         | 0.9997    | 0.9953        | 1.004         | 9.046e-01      |                  |                   |                   | 9.041e-01    | 9.046e-01         |                  |



**Cohort: Validation**

**Outcome: Progression Free Survival by CPI ( Lung Transplant is Censored )**

**Predictor: Age (years)**

|                           | Patients<br>(N) | Events<br>(n) | Events<br>(%) | HR    | HR<br>95% LCL | HR<br>95% UCL | Wald<br>pvalue | Median<br>(yrs.) | Median<br>95% LCL | Median<br>95% UCL | LR<br>pvalue | Logrank<br>pvalue | DevLIN<br>pvalue |
|---------------------------|-----------------|---------------|---------------|-------|---------------|---------------|----------------|------------------|-------------------|-------------------|--------------|-------------------|------------------|
| <b>Quintiles</b>          |                 |               |               |       |               |               |                |                  |                   |                   |              |                   |                  |
| < 61.6                    | 19              | 12            | 63.16         | ----  | ----          | ----          | ----           | 0.73             | 4.594e-01         |                   | 3.42e-01     | 3.32e-01          | 4.04e-01         |
| [ 61.6,66.5)              | 20              | 14            | 70.00         | 2.104 | 9.516e-01     | 4.651         | 6.616e-02      | 0.59             | 4.513e-01         |                   |              |                   |                  |
| [ 66.5,70.1)              | 20              | 14            | 70.00         | 1.127 | 5.114e-01     | 2.485         | 7.661e-01      | 0.99             | 6.265e-01         |                   |              |                   |                  |
| [ 70.1,77.1)              | 20              | 18            | 90.00         | 1.502 | 7.148e-01     | 3.158         | 2.828e-01      | 0.98             | 6.895e-01         | 1.130             |              |                   |                  |
| ≥ 77.1                    | 20              | 18            | 90.00         | 1.674 | 7.838e-01     | 3.575         | 1.832e-01      | 0.85             | 7.251e-01         | 1.552             |              |                   |                  |
| <b>Quartiles</b>          |                 |               |               |       |               |               |                |                  |                   |                   |              |                   |                  |
| < 62.8                    | 24              | 16            | 66.67         | ----  | ----          | ----          | ----           | 0.61             | 4.594e-01         |                   | 7.47e-01     | 7.42e-01          | 6.45e-01         |
| [ 62.8,68.4)              | 25              | 17            | 68.00         | 1.355 | 6.747e-01     | 2.722         | 3.930e-01      | 0.63             | 5.471e-01         |                   |              |                   |                  |
| [ 68.4,75)                | 25              | 20            | 80.00         | 1.008 | 5.142e-01     | 1.974         | 9.825e-01      | 0.99             | 8.346e-01         | 1.130             |              |                   |                  |
| ≥ 75                      | 25              | 23            | 92.00         | 1.255 | 6.536e-01     | 2.410         | 4.949e-01      | 0.90             | 7.934e-01         | 1.415             |              |                   |                  |
| <b>Tertiles</b>           |                 |               |               |       |               |               |                |                  |                   |                   |              |                   |                  |
| < 65.3                    | 33              | 23            | 69.70         | ----  | ----          | ----          | ----           | 0.61             | 5.471e-01         | 2.094             | 8.48e-01     | 8.45e-01          | 8.53e-01         |
| [ 65.3,72.8)              | 33              | 24            | 72.73         | 1.017 | 5.671e-01     | 1.824         | 9.549e-01      | 0.98             | 8.236e-01         | 1.130             |              |                   |                  |
| ≥ 72.8                    | 33              | 29            | 87.88         | 1.157 | 6.642e-01     | 2.016         | 6.063e-01      | 0.85             | 7.251e-01         | 1.117             |              |                   |                  |
| <b>Profile Likelihood</b> |                 |               |               |       |               |               |                |                  |                   |                   |              |                   |                  |
| <61.8                     | 20              | 13            | 65.00         | ----  | ----          | ----          | ----           | 0.73             | 4.594e-01         |                   | 2.68e-01     | 2.84e-01          | 4.57e-01         |
| ≥61.8                     | 79              | 63            | 79.75         | 1.398 | 7.578e-01     | 2.578         | 2.838e-01      | 0.90             | 7.990e-01         | 1.015             |              |                   |                  |
| <b>Quantitative</b>       |                 |               |               |       |               |               |                |                  |                   |                   |              |                   |                  |
|                           | 99              | 76            | 76.77         | 1.011 | 9.847e-01     | 1.038         | 4.172e-01      |                  |                   |                   | 4.113e-01    | 4.173e-01         |                  |
| <b>Predictor: Gender</b>  |                 |               |               |       |               |               |                |                  |                   |                   |              |                   |                  |
| Female                    | 34              | 27            | 79.41         | ----  | ----          | ----          | ----           | 0.99             | 0.854             | 1.42              |              |                   |                  |
| Male                      | 65              | 49            | 75.38         | 1.41  | 0.876         | 2.274         | 1.56E-01       | 0.80             | 0.613             | 0.98              | 1.51E-01     | 1.52E-01          |                  |

**Cohort: Validation**

**Outcome: Progression Free Survival by CPI ( Lung Transplant is Censored )**

**Predictor: Baseline (4-month) FVC % Predicted**

|                           | Patients<br>(N) | Events<br>(n) | Events<br>(%) | HR        | HR<br>95% LCL | HR<br>95% UCL | Wald<br>pvalue | Median<br>(yrs.) | Median<br>95% LCL | Median<br>95% UCL | LR<br>pvalue | Logrank<br>pvalue | DevLIN<br>pvalue |
|---------------------------|-----------------|---------------|---------------|-----------|---------------|---------------|----------------|------------------|-------------------|-------------------|--------------|-------------------|------------------|
| <b>Quintiles</b>          |                 |               |               |           |               |               |                |                  |                   |                   |              |                   |                  |
| < 48.7                    | 18              | 15            | 83.33         | ----      | ----          | ----          | ----           | 0.79             | 4.431e-01         | 2.335             | 5.61e-01     | 5.21e-01          | 4.95e-01         |
| [ 48.7,54.9)              | 16              | 12            | 75.00         | 9.561e-01 | 4.471e-01     | 2.045         | 9.079e-01      | 0.90             | 4.759e-01         |                   |              |                   |                  |
| [ 54.9,62)                | 17              | 16            | 94.12         | 1.603     | 7.725e-01     | 3.326         | 2.052e-01      | 0.82             | 5.471e-01         | 1.117             |              |                   |                  |
| [ 62,77.2)                | 17              | 13            | 76.47         | 1.092     | 5.138e-01     | 2.321         | 8.190e-01      | 0.98             | 6.046e-01         |                   |              |                   |                  |
| ≥ 77.2                    | 18              | 13            | 72.22         | 8.627e-01 | 4.015e-01     | 1.854         | 7.051e-01      | 0.83             | 6.238e-01         |                   |              |                   |                  |
| <b>Quartiles</b>          |                 |               |               |           |               |               |                |                  |                   |                   |              |                   |                  |
| < 49.7                    | 21              | 18            | 85.71         | ----      | ----          | ----          | ----           | 0.79             | 4.513e-01         | 2.094             | 4.54e-01     | 4.54e-01          | 3.36e-01         |
| [ 49.7,58.2)              | 22              | 17            | 77.27         | 1.242     | 6.358e-01     | 2.427         | 5.256e-01      | 0.69             | 4.950e-01         | 1.117             |              |                   |                  |
| [ 58.2,72.6)              | 22              | 18            | 81.82         | 1.409     | 7.245e-01     | 2.742         | 3.122e-01      | 0.77             | 5.307e-01         | 1.130             |              |                   |                  |
| ≥ 72.6                    | 21              | 16            | 76.19         | 8.363e-01 | 4.198e-01     | 1.666         | 6.112e-01      | 0.98             | 7.278e-01         |                   |              |                   |                  |
| <b>Tertiles</b>           |                 |               |               |           |               |               |                |                  |                   |                   |              |                   |                  |
| < 51.8                    | 28              | 22            | 78.57         | ----      | ----          | ----          | ----           | 0.79             | 4.513e-01         | 1.563             | 1.71e-01     | 1.50e-01          | 1.63e-01         |
| [ 51.8,67.6)              | 30              | 25            | 83.33         | 1.606     | 8.898e-01     | 2.900         | 1.158e-01      | 0.73             | 5.307e-01         | 9.358e-01         |              |                   |                  |
| ≥ 67.6                    | 28              | 22            | 78.57         | 9.605e-01 | 5.250e-01     | 1.757         | 8.959e-01      | 0.98             | 6.238e-01         | 1.913             |              |                   |                  |
| <b>Profile Likelihood</b> |                 |               |               |           |               |               |                |                  |                   |                   |              |                   |                  |
| < 73.3                    | 65              | 53            | 81.54         | ----      | ----          | ----          | ----           | 0.79             | 6.046e-01         | 9.879e-01         | 2.12e-01     | 2.23e-01          | 6.71e-02         |
| ≥ 73.3                    | 21              | 16            | 76.19         | 7.011e-01 | 3.946e-01     | 1.246         | 2.260e-01      | 0.98             | 7.278e-01         |                   |              |                   |                  |
| <b>Quantitative</b>       |                 |               |               |           |               |               |                |                  |                   |                   |              |                   |                  |
|                           | 86              | 69            | 80.23         | 9.987e-01 | 9.854e-01     | 1.012         | 8.490e-01      |                  |                   |                   | 8.489e-01    | 8.490e-01         |                  |

**Cohort: Validation**

**Outcome: Progression Free Survival by CPI ( Lung Transplant is Censored )**

**Predictor: Baseline (4-month) DLco % Predicted**

|                           | Patients<br>(N) | Events<br>(n) | Events<br>(%) | HR        | HR<br>95% LCL | HR<br>95% UCL | Wald<br>pvalue | Median<br>(yrs.) | Median<br>95% LCL | Median<br>95% UCL | LR<br>pvalue | Logrank<br>pvalue | DevLIN<br>pvalue |
|---------------------------|-----------------|---------------|---------------|-----------|---------------|---------------|----------------|------------------|-------------------|-------------------|--------------|-------------------|------------------|
| <b>Quintiles</b>          |                 |               |               |           |               |               |                |                  |                   |                   |              |                   |                  |
| < 30.1                    | 17              | 10            | 58.82         | ----      | ----          | ----          | ----           | 0.99             | 4.349e-01         |                   | 9.67e-01     | 9.67e-01          | 8.99e-01         |
| [ 30.1,38.8)              | 15              | 13            | 86.67         | 8.475e-01 | 3.692e-01     | 1.945         | 6.962e-01      | 0.83             | 7.278e-01         | 2.370             |              |                   |                  |
| [ 38.8,46)                | 16              | 13            | 81.25         | 1.034     | 4.500e-01     | 2.375         | 9.375e-01      | 0.94             | 4.950e-01         |                   |              |                   |                  |
| [ 46,62.2)                | 16              | 14            | 87.50         | 8.794e-01 | 3.889e-01     | 1.989         | 7.576e-01      | 0.85             | 6.265e-01         |                   |              |                   |                  |
| ≥ 62.2                    | 17              | 15            | 88.24         | 1.074     | 4.764e-01     | 2.423         | 8.626e-01      | 0.58             | 5.307e-01         | 1.552             |              |                   |                  |
| <b>Quartiles</b>          |                 |               |               |           |               |               |                |                  |                   |                   |              |                   |                  |
| < 31.7                    | 21              | 13            | 61.90         | ----      | ----          | ----          | ----           | 0.99             | 5.935e-01         |                   | 5.83e-01     | 5.73e-01          | 4.08e-01         |
| [ 31.7,43.7)              | 19              | 17            | 89.47         | 1.491     | 7.211e-01     | 3.083         | 2.811e-01      | 0.82             | 4.513e-01         | 1.415             |              |                   |                  |
| [ 43.7,56.5)              | 20              | 16            | 80.00         | 1.001     | 4.799e-01     | 2.086         | 9.988e-01      | 0.85             | 6.265e-01         |                   |              |                   |                  |
| ≥ 56.5                    | 21              | 19            | 90.48         | 1.343     | 6.547e-01     | 2.754         | 4.212e-01      | 0.82             | 5.471e-01         | 1.130             |              |                   |                  |
| <b>Tertiles</b>           |                 |               |               |           |               |               |                |                  |                   |                   |              |                   |                  |
| < 34.6                    | 27              | 18            | 66.67         | ----      | ----          | ----          | ----           | 0.99             | 5.935e-01         | 1.415             | 8.92e-01     | 8.91e-01          | 7.05e-01         |
| [ 34.6,47.8)              | 27              | 24            | 88.89         | 1.049     | 5.681e-01     | 1.937         | 8.785e-01      | 0.85             | 6.127e-01         | 1.563             |              |                   |                  |
| ≥ 47.8                    | 27              | 23            | 85.19         | 1.159     | 6.195e-01     | 2.169         | 6.440e-01      | 0.69             | 5.608e-01         | 1.081             |              |                   |                  |
| <b>Profile Likelihood</b> |                 |               |               |           |               |               |                |                  |                   |                   |              |                   |                  |
| < 32.3                    | 22              | 13            | 59.09         | ----      | ----          | ----          | ----           | 0.99             | 5.935e-01         |                   | 3.84e-01     | 3.95e-01          | 3.06e-01         |
| ≥ 32.3                    | 59              | 52            | 88.14         | 1.303     | 7.073e-01     | 2.402         | 3.955e-01      | 0.82             | 6.127e-01         | 9.768e-01         |              |                   |                  |
| <b>Quantitative</b>       |                 |               |               |           |               |               |                |                  |                   |                   |              |                   |                  |
|                           | 81              | 65            | 80.25         | 1.001     | 9.878e-01     | 1.014         | 9.139e-01      |                  |                   |                   | 9.140e-01    | 9.139e-01         |                  |

**Cohort: Validation**

**Outcome: Progression Free Survival by CPI ( Lung Transplant is Censored )**

**Predictor: Baseline (4-month) CPI**

|                           | Patients<br>(N) | Events<br>(n) | Events<br>(%) | HR        | HR<br>95% LCL | HR<br>95% UCL | Wald<br>pvalue | Median<br>(yrs.) | Median<br>95% LCL | Median<br>95% UCL | LR<br>pvalue | Logrank<br>pvalue | DevLIN<br>pvalue |
|---------------------------|-----------------|---------------|---------------|-----------|---------------|---------------|----------------|------------------|-------------------|-------------------|--------------|-------------------|------------------|
| <b>Quintiles</b>          |                 |               |               |           |               |               |                |                  |                   |                   |              |                   |                  |
| < 41.2                    | 17              | 14            | 82.35         | ----      | ----          | ----          | ----           | 0.90             | 5.553e-01         |                   | 6.81e-01     | 6.58e-01          | 6.02e-01         |
| [ 41.2,50.9)              | 15              | 13            | 86.67         | 1.131     | 5.213e-01     | 2.454         | 7.551e-01      | 0.85             | 6.265e-01         |                   |              |                   |                  |
| [ 50.9,59.1)              | 17              | 15            | 88.24         | 1.536     | 7.249e-01     | 3.254         | 2.627e-01      | 0.73             | 4.950e-01         | 9.879e-01         |              |                   |                  |
| [ 59.1,65.3)              | 16              | 13            | 81.25         | 9.548e-01 | 4.406e-01     | 2.069         | 9.066e-01      | 0.94             | 4.431e-01         |                   |              |                   |                  |
| ≥ 65.3                    | 16              | 10            | 62.50         | 8.813e-01 | 3.847e-01     | 2.019         | 7.650e-01      | 1.01             | 4.349e-01         |                   |              |                   |                  |
| <b>Quartiles</b>          |                 |               |               |           |               |               |                |                  |                   |                   |              |                   |                  |
| < 44.4                    | 21              | 18            | 85.71         | ----      | ----          | ----          | ----           | 0.85             | 5.471e-01         | 1.130             | 9.36e-01     | 9.39e-01          | 6.45e-01         |
| [ 44.4,55.5)              | 19              | 16            | 84.21         | 9.721e-01 | 4.890e-01     | 1.933         | 9.358e-01      | 0.83             | 6.265e-01         | 1.913             |              |                   |                  |
| [ 55.5,64.1)              | 21              | 17            | 80.95         | 1.027     | 5.227e-01     | 2.018         | 9.383e-01      | 0.77             | 4.950e-01         | 1.563             |              |                   |                  |
| ≥ 64.1                    | 20              | 14            | 70.00         | 8.274e-01 | 4.055e-01     | 1.688         | 6.026e-01      | 1.01             | 4.349e-01         | 2.094             |              |                   |                  |
| <b>Tertiles</b>           |                 |               |               |           |               |               |                |                  |                   |                   |              |                   |                  |
| < 49.9                    | 27              | 22            | 81.48         | ----      | ----          | ----          | ----           | 0.85             | 5.608e-01         | 1.470             | 8.33e-01     | 8.35e-01          | 8.29e-01         |
| [ 49.9,60.6)              | 27              | 24            | 88.89         | 1.162     | 6.454e-01     | 2.093         | 6.163e-01      | 0.77             | 6.265e-01         | 9.879e-01         |              |                   |                  |
| ≥ 60.6                    | 27              | 19            | 70.37         | 9.846e-01 | 5.280e-01     | 1.836         | 9.611e-01      | 0.99             | 4.431e-01         | 1.415             |              |                   |                  |
| <b>Profile Likelihood</b> |                 |               |               |           |               |               |                |                  |                   |                   |              |                   |                  |
| <59.1                     | 49              | 42            | 85.71         | ----      | ----          | ----          | ----           | 0.77             | 6.238e-01         | 9.768e-01         | 3.32e-01     | 3.40e-01          | 1.36e-01         |
| ≥59.1                     | 32              | 23            | 71.88         | 7.746e-01 | 4.597e-01     | 1.305         | 3.373e-01      | 0.99             | 5.935e-01         | 1.563             |              |                   |                  |
| <b>Quantitative</b>       | 81              | 65            | 80.25         | 1.000     | 9.827e-01     | 1.018         | 9.952e-01      |                  |                   |                   | 9.952e-01    | 9.952e-01         |                  |

**Cohort: Validation**  
**Outcome: Progression Free Survival by CPI ( Lung Transplant is Censored )**  
**Predictor: Baseline (3-month) FVC % Predicted**

|                           | Patients<br>(N) | Events<br>(n) | Events<br>(%) | HR        | HR<br>95% LCL | HR<br>95% UCL | Wald<br>pvalue | Median<br>(yrs.) | Median<br>95% LCL | Median<br>95% UCL | LR<br>pvalue | Logrank<br>pvalue | DevLIN<br>pvalue |
|---------------------------|-----------------|---------------|---------------|-----------|---------------|---------------|----------------|------------------|-------------------|-------------------|--------------|-------------------|------------------|
| <b>Quintiles</b>          |                 |               |               |           |               |               |                |                  |                   |                   |              |                   |                  |
| < 48.9                    | 15              | 12            | 80.00         | ----      | ----          | ----          | ----           | 0.63             | 4.431e-01         |                   | 8.29e-01     | 8.08e-01          | 6.35e-01         |
| [ 48.9,55.7)              | 14              | 10            | 71.43         | 8.849e-01 | 3.812e-01     | 2.054         | 7.760e-01      | 1.12             | 4.759e-01         |                   |              |                   |                  |
| [ 55.7,62)                | 13              | 12            | 92.31         | 1.395     | 6.149e-01     | 3.165         | 4.257e-01      | 0.82             | 4.349e-01         |                   |              |                   |                  |
| [ 62,76.7)                | 16              | 12            | 75.00         | 8.972e-01 | 4.007e-01     | 2.009         | 7.919e-01      | 0.99             | 7.251e-01         |                   |              |                   |                  |
| ≥ 76.7                    | 15              | 12            | 80.00         | 9.426e-01 | 4.147e-01     | 2.143         | 8.877e-01      | 0.73             | 5.608e-01         |                   |              |                   |                  |
| <b>Quartiles</b>          |                 |               |               |           |               |               |                |                  |                   |                   |              |                   |                  |
| < 49.7                    | 18              | 15            | 83.33         | ----      | ----          | ----          | ----           | 0.79             | 5.935e-01         | 2.094             | 7.97e-01     | 7.97e-01          | 5.53e-01         |
| [ 49.7,58.8)              | 18              | 13            | 72.22         | 1.257     | 5.921e-01     | 2.667         | 5.519e-01      | 0.82             | 4.759e-01         |                   |              |                   |                  |
| [ 58.8,73.3)              | 19              | 15            | 78.95         | 1.224     | 5.945e-01     | 2.519         | 5.837e-01      | 0.94             | 5.307e-01         | 1.552             |              |                   |                  |
| ≥ 73.3                    | 18              | 15            | 83.33         | 9.097e-01 | 4.384e-01     | 1.888         | 7.995e-01      | 0.85             | 6.238e-01         | 2.198             |              |                   |                  |
| <b>Tertiles</b>           |                 |               |               |           |               |               |                |                  |                   |                   |              |                   |                  |
| < 51.8                    | 24              | 18            | 75.00         | ----      | ----          | ----          | ----           | 0.79             | 5.935e-01         | 2.094             | 1.66e-01     | 1.43e-01          | 1.47e-01         |
| [ 51.8,68.1)              | 25              | 20            | 80.00         | 1.772     | 9.089e-01     | 3.455         | 9.302e-02      | 0.73             | 4.787e-01         | 1.117             |              |                   |                  |
| ≥ 68.1                    | 24              | 20            | 83.33         | 1.014     | 5.303e-01     | 1.939         | 9.665e-01      | 0.98             | 6.238e-01         | 1.913             |              |                   |                  |
| <b>Profile Likelihood</b> |                 |               |               |           |               |               |                |                  |                   |                   |              |                   |                  |
| < 68.3                    | 49              | 38            | 77.55         | ----      | ----          | ----          | ----           | 0.79             | 5.935e-01         | 1.007             | 3.85e-01     | 3.84e-01          | 8.91e-02         |
| ≥ 68.3                    | 24              | 20            | 83.33         | 7.853e-01 | 4.521e-01     | 1.364         | 3.910e-01      | 0.98             | 6.238e-01         | 1.913             |              |                   |                  |
| <b>Quantitative</b>       |                 |               |               |           |               |               |                |                  |                   |                   |              |                   |                  |
|                           | 73              | 58            | 79.45         | 1.001     | 9.862e-01     | 1.015         | 9.333e-01      |                  |                   |                   | 9.333e-01    | 9.333e-01         |                  |

**Cohort: Validation**  
**Outcome: Progression Free Survival by CPI ( Lung Transplant is Censored )**  
**Predictor: Baseline (3-month) DLco % Predicted**

|                           | Patients<br>(N) | Events<br>(n) | Events<br>(%) | HR    | HR<br>95% LCL | HR<br>95% UCL | Wald<br>pvalue | Median<br>(yrs.) | Median<br>95% LCL | Median<br>95% UCL | LR<br>pvalue | Logrank<br>pvalue | DevLIN<br>pvalue |
|---------------------------|-----------------|---------------|---------------|-------|---------------|---------------|----------------|------------------|-------------------|-------------------|--------------|-------------------|------------------|
| <b>Quintiles</b>          |                 |               |               |       |               |               |                |                  |                   |                   |              |                   |                  |
| < 28.6                    | 14              | 8             | 57.14         | ----  | ----          | ----          | ----           | 1.12             | 4.349e-01         |                   | 9.94e-01     | 9.94e-01          | 9.93e-01         |
| [ 28.6,38.3)              | 13              | 10            | 76.92         | 1.024 | 4.010e-01     | 2.614         | 9.606e-01      | 0.82             | 4.431e-01         |                   |              |                   |                  |
| [ 38.3,46)                | 13              | 11            | 84.62         | 1.062 | 4.236e-01     | 2.661         | 8.982e-01      | 0.94             | 6.127e-01         |                   |              |                   |                  |
| [ 46,61.3)                | 14              | 13            | 92.86         | 1.069 | 4.400e-01     | 2.599         | 8.824e-01      | 0.85             | 6.265e-01         |                   |              |                   |                  |
| ≥ 61.3                    | 14              | 13            | 92.86         | 1.208 | 4.922e-01     | 2.964         | 6.802e-01      | 0.56             | 5.307e-01         |                   |              |                   |                  |
| <b>Quartiles</b>          |                 |               |               |       |               |               |                |                  |                   |                   |              |                   |                  |
| < 30.9                    | 18              | 10            | 55.56         | ----  | ----          | ----          | ----           | 0.99             | 5.935e-01         |                   | 8.32e-01     | 8.39e-01          | 6.42e-01         |
| [ 30.9,43.8)              | 16              | 14            | 87.50         | 1.357 | 5.999e-01     | 3.067         | 4.638e-01      | 0.94             | 3.637e-01         |                   |              |                   |                  |
| [ 43.8,55.1)              | 16              | 14            | 87.50         | 1.302 | 5.759e-01     | 2.944         | 5.258e-01      | 0.85             | 6.238e-01         | 2.198             |              |                   |                  |
| ≥ 55.1                    | 18              | 17            | 94.44         | 1.421 | 6.423e-01     | 3.142         | 3.860e-01      | 0.63             | 5.553e-01         | 1.130             |              |                   |                  |
| <b>Tertiles</b>           |                 |               |               |       |               |               |                |                  |                   |                   |              |                   |                  |
| < 33.8                    | 22              | 13            | 59.09         | ----  | ----          | ----          | ----           | 1.01             | 5.935e-01         |                   | 5.33e-01     | 5.41e-01          | 2.02e-01         |
| [ 33.8,47.4)              | 24              | 22            | 91.67         | 1.317 | 6.621e-01     | 2.619         | 4.328e-01      | 0.85             | 6.046e-01         | 1.563             |              |                   |                  |
| ≥ 47.4                    | 22              | 20            | 90.91         | 1.486 | 7.296e-01     | 3.025         | 2.753e-01      | 0.69             | 5.608e-01         | 1.081             |              |                   |                  |
| <b>Profile Likelihood</b> |                 |               |               |       |               |               |                |                  |                   |                   |              |                   |                  |
| < 32.3                    | 20              | 11            | 55.00         | ----  | ----          | ----          | ----           | 1.12             | 7.278e-01         |                   | 1.71e-01     | 1.86e-01          | 1.25e-01         |
| ≥ 32.3                    | 48              | 44            | 91.67         | 1.562 | 8.032e-01     | 3.037         | 1.888e-01      | 0.82             | 6.127e-01         | 9.879e-01         |              |                   |                  |
| <b>Quantitative</b>       | 68              | 55            | 80.88         | 1.002 | 9.885e-01     | 1.016         | 7.412e-01      |                  |                   |                   | 7.424e-01    | 7.411e-01         |                  |

**Cohort: Validation**

**Outcome: Progression Free Survival by CPI ( Lung Transplant is Censored )**

**Predictor: Baseline (3-month) CPI**

|                           | Patients<br>(N) | Events<br>(n) | Events<br>(%) | HR        | HR<br>95% LCL | HR<br>95% UCL | Wald<br>pvalue | Median<br>(yrs.) | Median<br>95% LCL | Median<br>95% UCL | LR<br>pvalue | Logrank<br>pvalue | DevLIN<br>pvalue |
|---------------------------|-----------------|---------------|---------------|-----------|---------------|---------------|----------------|------------------|-------------------|-------------------|--------------|-------------------|------------------|
| <b>Quintiles</b>          |                 |               |               |           |               |               |                |                  |                   |                   |              |                   |                  |
| < 42.9                    | 14              | 13            | 92.86         | ----      | ----          | ----          | ----           | 0.56             | 5.307e-01         |                   | 5.46e-01     | 5.52e-01          | 4.12e-01         |
| [ 42.9,51.7)              | 13              | 11            | 84.62         | 8.467e-01 | 3.699e-01     | 1.938         | 6.936e-01      | 0.85             | 8.236e-01         |                   |              |                   |                  |
| [ 51.7,59.8)              | 14              | 12            | 85.71         | 8.670e-01 | 3.879e-01     | 1.938         | 7.281e-01      | 0.73             | 6.127e-01         |                   |              |                   |                  |
| [ 59.8,66)                | 14              | 12            | 85.71         | 1.234     | 5.493e-01     | 2.774         | 6.102e-01      | 0.71             | 3.637e-01         |                   |              |                   |                  |
| ≥ 66                      | 13              | 7             | 53.85         | 5.570e-01 | 2.181e-01     | 1.422         | 2.212e-01      | 1.12             | 4.349e-01         |                   |              |                   |                  |
| <b>Quartiles</b>          |                 |               |               |           |               |               |                |                  |                   |                   |              |                   |                  |
| < 45.4                    | 18              | 17            | 94.44         | ----      | ----          | ----          | ----           | 0.62             | 5.553e-01         | 1.130             | 9.45e-01     | 9.48e-01          | 9.28e-01         |
| [ 45.4,56)                | 16              | 14            | 87.50         | 1.009     | 4.907e-01     | 2.077         | 9.796e-01      | 0.85             | 6.265e-01         | 1.913             |              |                   |                  |
| [ 56,64.8)                | 17              | 13            | 76.47         | 9.006e-01 | 4.321e-01     | 1.877         | 7.798e-01      | 0.82             | 7.251e-01         |                   |              |                   |                  |
| ≥ 64.8                    | 17              | 11            | 64.71         | 8.163e-01 | 3.776e-01     | 1.765         | 6.059e-01      | 0.99             | 4.349e-01         |                   |              |                   |                  |
| <b>Tertiles</b>           |                 |               |               |           |               |               |                |                  |                   |                   |              |                   |                  |
| < 50.3                    | 22              | 20            | 90.91         | ----      | ----          | ----          | ----           | 0.85             | 5.608e-01         | 1.470             | 8.50e-01     | 8.55e-01          | 7.74e-01         |
| [ 50.3,62.2)              | 24              | 20            | 83.33         | 1.136     | 6.040e-01     | 2.137         | 6.923e-01      | 0.73             | 6.265e-01         | 1.185             |              |                   |                  |
| ≥ 62.2                    | 22              | 15            | 68.18         | 9.401e-01 | 4.766e-01     | 1.854         | 8.585e-01      | 0.99             | 4.431e-01         | 2.094             |              |                   |                  |
| <b>Profile Likelihood</b> |                 |               |               |           |               |               |                |                  |                   |                   |              |                   |                  |
| <66.1                     | 55              | 48            | 87.27         | ----      | ----          | ----          | ----           | 0.82             | 6.127e-01         | 9.768e-01         | 1.52e-01     | 1.73e-01          | 1.28e-01         |
| ≥66.1                     | 13              | 7             | 53.85         | 5.773e-01 | 2.590e-01     | 1.287         | 1.790e-01      | 1.12             | 4.349e-01         |                   |              |                   |                  |
| <b>Quantitative</b>       |                 |               |               |           |               |               |                |                  |                   |                   |              |                   |                  |
|                           | 68              | 55            | 80.88         | 9.969e-01 | 9.786e-01     | 1.016         | 7.462e-01      |                  |                   |                   | 7.474e-01    | 7.461e-01         |                  |

**Cohort: Validation**

**Outcome: Progression Free Survival by CPI ( Lung Transplant is Censored )**

**Predictor: MMP7Elisa ( ng / mL )**

|                           | Patients<br>(N) | Events<br>(n) | Events<br>(%) | HR        | HR<br>95% LCL | HR<br>95% UCL | Wald<br>pvalue | Median<br>(yrs.) | Median<br>95% LCL | Median<br>95% UCL | LR<br>pvalue | Logrank<br>pvalue | DevLIN<br>pvalue |
|---------------------------|-----------------|---------------|---------------|-----------|---------------|---------------|----------------|------------------|-------------------|-------------------|--------------|-------------------|------------------|
| <b>Quintiles</b>          |                 |               |               |           |               |               |                |                  |                   |                   |              |                   |                  |
| < 3.41                    | 19              | 16            | 84.21         | ----      | ----          | ----          | ----           | 0.63             | 5.307e-01         | 9.879e-01         | 4.41e-01     | 4.29e-01          | 4.79e-01         |
| [ 3.41,4.56)              | 19              | 14            | 73.68         | 5.004e-01 | 2.384e-01     | 1.050         | 6.718e-02      | 1.02             | 7.251e-01         |                   |              |                   |                  |
| [ 4.56,5.49)              | 20              | 18            | 90.00         | 7.692e-01 | 3.831e-01     | 1.545         | 4.607e-01      | 0.98             | 4.594e-01         | 2.045             |              |                   |                  |
| [ 5.49,7.52)              | 20              | 14            | 70.00         | 6.836e-01 | 3.274e-01     | 1.427         | 3.112e-01      | 0.85             | 6.127e-01         | 2.094             |              |                   |                  |
| ≥ 7.52                    | 21              | 14            | 66.67         | 6.115e-01 | 2.926e-01     | 1.278         | 1.910e-01      | 0.83             | 6.238e-01         |                   |              |                   |                  |
| <b>Quartiles</b>          |                 |               |               |           |               |               |                |                  |                   |                   |              |                   |                  |
| < 3.54                    | 24              | 19            | 79.17         | ----      | ----          | ----          | ----           | 0.85             | 6.046e-01         | 1.130             | 8.76e-01     | 8.73e-01          | 9.08e-01         |
| [ 3.54,4.94)              | 24              | 20            | 83.33         | 1.234     | 6.497e-01     | 2.343         | 5.207e-01      | 0.77             | 5.935e-01         | 1.127             |              |                   |                  |
| [ 4.94,6.46)              | 25              | 20            | 80.00         | 1.010     | 5.324e-01     | 1.916         | 9.758e-01      | 0.98             | 4.950e-01         | 2.094             |              |                   |                  |
| ≥ 6.46                    | 26              | 17            | 65.38         | 9.634e-01 | 4.957e-01     | 1.873         | 9.125e-01      | 0.83             | 7.278e-01         | 1.552             |              |                   |                  |
| <b>Tertiles</b>           |                 |               |               |           |               |               |                |                  |                   |                   |              |                   |                  |
| < 3.99                    | 33              | 26            | 78.79         | ----      | ----          | ----          | ----           | 0.85             | 6.265e-01         | 1.127             | 5.15e-01     | 5.11e-01          | 5.78e-01         |
| [ 3.99,5.91)              | 32              | 29            | 90.62         | 1.251     | 7.314e-01     | 2.141         | 4.130e-01      | 0.90             | 5.553e-01         | 1.081             |              |                   |                  |
| ≥ 5.91                    | 34              | 21            | 61.76         | 9.117e-01 | 5.096e-01     | 1.631         | 7.553e-01      | 0.85             | 7.278e-01         | 1.470             |              |                   |                  |
| <b>Profile Likelihood</b> |                 |               |               |           |               |               |                |                  |                   |                   |              |                   |                  |
| < 3.4                     | 20              | 17            | 85.00         | ----      | ----          | ----          | ----           | 0.80             | 5.608e-01         | 9.879e-01         | 1.79e-01     | 1.62e-01          | 2.12e-01         |
| ≥ 3.4                     | 79              | 59            | 74.68         | 6.707e-01 | 3.825e-01     | 1.176         | 1.633e-01      | 0.98             | 7.278e-01         | 1.117             |              |                   |                  |
| <b>Quantitative</b>       |                 |               |               |           |               |               |                |                  |                   |                   |              |                   |                  |
|                           | 99              | 76            | 76.77         | 9.812e-01 | 9.106e-01     | 1.057         | 6.187e-01      |                  |                   |                   | 6.115e-01    | 6.186e-01         |                  |



**Cohort: Validation**  
**Outcome: Progression Free Survival by CPI ( Lung Transplant is Censored )**  
**Predictor: ICAM ( ng / mL )**

|                           | Patients<br>(N) | Events<br>(n) | Events<br>(%) | HR        | HR<br>95% LCL | HR<br>95% UCL | Wald<br>pvalue | Median<br>(yrs.) | Median<br>95% LCL | Median<br>95% UCL | LR<br>pvalue | Logrank<br>pvalue | DevLIN<br>pvalue |
|---------------------------|-----------------|---------------|---------------|-----------|---------------|---------------|----------------|------------------|-------------------|-------------------|--------------|-------------------|------------------|
| <b>Quintiles</b>          |                 |               |               |           |               |               |                |                  |                   |                   |              |                   |                  |
| < 226                     | 20              | 13            | 65.00         | ----      | ----          | ----          | ----           | 0.98             | 7.990e-01         |                   | 1.05e-01     | 8.20e-02          | 5.07e-02         |
| [ 226,281)                | 20              | 17            | 85.00         | 1.145     | 5.447e-01     | 2.409         | 7.203e-01      | 1.02             | 8.236e-01         | 2.198             |              |                   |                  |
| [ 281,326)                | 18              | 16            | 88.89         | 1.891     | 8.878e-01     | 4.029         | 9.864e-02      | 0.60             | 4.513e-01         | 9.386e-01         |              |                   |                  |
| [ 326,419)                | 20              | 15            | 75.00         | 2.212     | 1.021         | 4.792         | 4.411e-02      | 0.62             | 4.759e-01         | 1.322             |              |                   |                  |
| ≥ 419                     | 21              | 15            | 71.43         | 9.899e-01 | 4.601e-01     | 2.130         | 9.794e-01      | 1.47             | 6.127e-01         | 2.370             |              |                   |                  |
| <b>Quartiles</b>          |                 |               |               |           |               |               |                |                  |                   |                   |              |                   |                  |
| < 238                     | 25              | 17            | 68.00         | ----      | ----          | ----          | ----           | 0.98             | 7.990e-01         |                   | 3.14e-01     | 2.86e-01          | 1.76e-01         |
| [ 238,303)                | 24              | 21            | 87.50         | 1.331     | 6.931e-01     | 2.555         | 3.906e-01      | 0.90             | 7.661e-01         | 1.180             |              |                   |                  |
| [ 303,387)                | 24              | 19            | 79.17         | 1.799     | 9.203e-01     | 3.516         | 8.594e-02      | 0.58             | 4.513e-01         | 1.322             |              |                   |                  |
| ≥ 387                     | 26              | 19            | 73.08         | 1.081     | 5.536e-01     | 2.111         | 8.197e-01      | 1.02             | 6.127e-01         | 2.094             |              |                   |                  |
| <b>Tertiles</b>           |                 |               |               |           |               |               |                |                  |                   |                   |              |                   |                  |
| < 258                     | 34              | 25            | 73.53         | ----      | ----          | ----          | ----           | 0.99             | 8.235e-01         | 1.180             | 4.33e-02     | 3.32e-02          | 1.57e-02         |
| [ 258,367)                | 31              | 27            | 87.10         | 2.019     | 1.154         | 3.531         | 1.377e-02      | 0.73             | 5.471e-01         | 9.030e-01         |              |                   |                  |
| ≥ 367                     | 34              | 24            | 70.59         | 1.210     | 6.854e-01     | 2.135         | 5.114e-01      | 0.99             | 6.127e-01         | 1.552             |              |                   |                  |
| <b>Profile Likelihood</b> |                 |               |               |           |               |               |                |                  |                   |                   |              |                   |                  |
| <258.3                    | 34              | 25            | 73.53         | ----      | ----          | ----          | ----           | 0.99             | 8.235e-01         | 1.180             | 8.25e-02     | 8.60e-02          | 3.99e-03         |
| ≥258.3                    | 65              | 51            | 78.46         | 1.528     | 9.369e-01     | 2.492         | 8.938e-02      | 0.79             | 6.127e-01         | 9.768e-01         |              |                   |                  |
| <b>Quantitative</b>       |                 |               |               |           |               |               |                |                  |                   |                   |              |                   |                  |
|                           | 99              | 76            | 76.77         | 0.9998    | 0.9978        | 1.002         | 8.529e-01      |                  |                   |                   | 8.526e-01    | 8.529e-01         |                  |

Cohort: **Validation**

Outcome: **Progression Free Survival by CPI ( Lung Transplant is Censored )**

Predictor: **IL8 ( ng / mL )**

|                           | Patients<br>(N) | Events<br>(n) | Events<br>(%) | HR        | HR<br>95% LCL | HR<br>95% UCL | Wald<br>pvalue | Median<br>(yrs.) | Median<br>95% LCL | Median<br>95% UCL | LR<br>pvalue | Logrank<br>pvalue | DevLIN<br>pvalue |
|---------------------------|-----------------|---------------|---------------|-----------|---------------|---------------|----------------|------------------|-------------------|-------------------|--------------|-------------------|------------------|
| <b>Quintiles</b>          |                 |               |               |           |               |               |                |                  |                   |                   |              |                   |                  |
| < 0.00767                 | 19              | 14            | 73.68         | ----      | ----          | ----          | ----           | 0.98             | 6.895e-01         |                   | 2.47e-01     | 2.23e-01          | 3.35e-01         |
| [ 0.00767,0.0101)         | 20              | 14            | 70.00         | 2.116     | 9.679e-01     | 4.626         | 6.036e-02      | 0.82             | 7.251e-01         |                   |              |                   |                  |
| [ 0.0101,0.0131)          | 18              | 14            | 77.78         | 1.455     | 6.767e-01     | 3.131         | 3.368e-01      | 0.56             | 4.759e-01         |                   |              |                   |                  |
| [ 0.0131,0.0178)          | 20              | 14            | 70.00         | 1.441     | 7.010e-01     | 2.961         | 3.204e-01      | 0.83             | 7.990e-01         |                   |              |                   |                  |
| ≥ 0.0178                  | 20              | 18            | 90.00         | 9.381e-01 | 4.400e-01     | 2.000         | 8.687e-01      | 0.94             | 6.238e-01         | 1.470             |              |                   |                  |
| <b>Quartiles</b>          |                 |               |               |           |               |               |                |                  |                   |                   |              |                   |                  |
| < 0.00825                 | 24              | 17            | 70.83         | ----      | ----          | ----          | ----           | 0.98             | 6.895e-01         | 2.299             | 1.15e-01     | 8.94e-02          | 1.67e-01         |
| [ 0.00825,0.0112)         | 24              | 17            | 70.83         | 2.320     | 1.159         | 4.644         | 1.749e-02      | 0.82             | 5.800e-01         |                   |              |                   |                  |
| [ 0.0112,0.0164)          | 24              | 18            | 75.00         | 1.435     | 7.463e-01     | 2.759         | 2.790e-01      | 0.63             | 4.759e-01         | 1.015             |              |                   |                  |
| ≥ 0.0164                  | 25              | 22            | 88.00         | 1.233     | 6.185e-01     | 2.459         | 5.517e-01      | 0.98             | 7.661e-01         | 1.470             |              |                   |                  |
| <b>Tertiles</b>           |                 |               |               |           |               |               |                |                  |                   |                   |              |                   |                  |
| < 0.00959                 | 32              | 21            | 65.62         | ----      | ----          | ----          | ----           | 0.98             | 8.235e-01         | 2.299             | 7.99e-02     | 8.83e-02          | 1.03e-01         |
| [ 0.00959,0.015)          | 32              | 25            | 78.12         | 1.764     | 9.845e-01     | 3.161         | 5.646e-02      | 0.73             | 5.553e-01         | 1.130             |              |                   |                  |
| ≥ 0.015                   | 33              | 28            | 84.85         | 1.805     | 9.937e-01     | 3.280         | 5.248e-02      | 0.85             | 6.265e-01         | 1.117             |              |                   |                  |
| <b>Profile Likelihood</b> |                 |               |               |           |               |               |                |                  |                   |                   |              |                   |                  |
| < 0.0093                  | 29              | 19            | 65.52         | ----      | ----          | ----          | ----           | 0.99             | 9.386e-01         |                   | 1.22e-02     | 1.48e-02          | 1.60e-02         |
| ≥ 0.0093                  | 68              | 55            | 80.88         | 1.941     | 1.127         | 3.344         | 1.687e-02      | 0.82             | 6.265e-01         | 9.879e-01         |              |                   |                  |
| <b>Quantitative *</b>     |                 |               |               |           |               |               |                |                  |                   |                   |              |                   |                  |
|                           | 97              | 74            | 76.29         | 1.013     | 9.876e-01     | 1.040         | 3.154e-01      |                  |                   |                   | 3.464e-01    | 3.191e-01         |                  |

\*Units of pg / mL were used in **Quantitative model only**.

**Cohort: Validation**

**Outcome: Progression Free Survival by CPI ( Lung Transplant is Censored )**

**Predictor: VCAM ( ng / mL )**

|                           | Patients<br>(N) | Events<br>(n) | Events<br>(%) | HR    | HR<br>95% LCL | HR<br>95% UCL | Wald<br>pvalue | Median<br>(yrs.) | Median<br>95% LCL | Median<br>95% UCL | LR<br>pvalue | Logrank<br>pvalue | DevLIN<br>pvalue |
|---------------------------|-----------------|---------------|---------------|-------|---------------|---------------|----------------|------------------|-------------------|-------------------|--------------|-------------------|------------------|
| <b>Quintiles</b>          |                 |               |               |       |               |               |                |                  |                   |                   |              |                   |                  |
| < 222                     | 20              | 12            | 60.00         | ----  | ----          | ----          | ----           | 1.13             | 8.235e-01         |                   | 7.35e-02     | 6.40e-02          | 1.11e-01         |
| [ 222,260)                | 20              | 17            | 85.00         | 2.942 | 1.352         | 6.402         | 6.534e-03      | 0.79             | 4.349e-01         | 9.768e-01         |              |                   |                  |
| [ 260,310)                | 19              | 15            | 78.95         | 1.524 | 6.977e-01     | 3.331         | 2.904e-01      | 0.99             | 9.030e-01         | 1.322             |              |                   |                  |
| [ 310,376)                | 20              | 16            | 80.00         | 1.526 | 7.052e-01     | 3.301         | 2.833e-01      | 0.85             | 6.238e-01         | 2.094             |              |                   |                  |
| ≥ 376                     | 20              | 16            | 80.00         | 2.079 | 9.550e-01     | 4.526         | 6.518e-02      | 0.73             | 4.787e-01         | 1.563             |              |                   |                  |
| <b>Quartiles</b>          |                 |               |               |       |               |               |                |                  |                   |                   |              |                   |                  |
| < 230                     | 25              | 16            | 64.00         | ----  | ----          | ----          | ----           | 1.01             | 8.235e-01         |                   | 2.41e-01     | 2.46e-01          | 1.32e-01         |
| [ 230,285)                | 24              | 21            | 87.50         | 2.020 | 1.015         | 4.020         | 4.523e-02      | 0.90             | 7.934e-01         | 1.015             |              |                   |                  |
| [ 285,358)                | 25              | 21            | 84.00         | 1.489 | 7.658e-01     | 2.895         | 2.407e-01      | 0.73             | 6.127e-01         | 1.180             |              |                   |                  |
| ≥ 358                     | 25              | 18            | 72.00         | 1.345 | 6.763e-01     | 2.675         | 3.980e-01      | 0.77             | 5.800e-01         | 1.913             |              |                   |                  |
| <b>Tertiles</b>           |                 |               |               |       |               |               |                |                  |                   |                   |              |                   |                  |
| < 246                     | 34              | 24            | 70.59         | ----  | ----          | ----          | ----           | 0.82             | 5.471e-01         | 2.198             | 9.59e-01     | 9.59e-01          | 5.03e-01         |
| [ 246,334)                | 32              | 26            | 81.25         | 1.039 | 5.909e-01     | 1.828         | 8.934e-01      | 0.94             | 7.251e-01         | 1.117             |              |                   |                  |
| ≥ 334                     | 33              | 26            | 78.79         | 1.087 | 6.186e-01     | 1.909         | 7.726e-01      | 0.77             | 5.935e-01         | 1.470             |              |                   |                  |
| <b>Profile Likelihood</b> |                 |               |               |       |               |               |                |                  |                   |                   |              |                   |                  |
| <227.6                    | 24              | 15            | 62.50         | ----  | ----          | ----          | ----           | 1.13             | 8.235e-01         |                   | 6.16e-02     | 7.36e-02          | 1.32e-01         |
| ≥227.6                    | 75              | 61            | 81.33         | 1.700 | 9.464e-01     | 3.052         | 7.581e-02      | 0.82             | 6.265e-01         | 9.768e-01         |              |                   |                  |
| <b>Quantitative</b>       | 99              | 76            | 76.77         | 1.001 | 0.999         | 1.003         | 2.541e-01      |                  |                   |                   | 2.658e-01    | 2.548e-01         |                  |

Cohort: **Validation**

Outcome: **Progression Free Survival by CPI ( Lung Transplant is Censored )**

Predictor: **S100A12 ( ng / mL )**

|                           | Patients<br>(N) | Events<br>(n) | Events<br>(%) | HR        | HR<br>95% LCL | HR<br>95% UCL | Wald<br>pvalue | Median<br>(yrs.) | Median<br>95% LCL | Median<br>95% UCL | LR<br>pvalue | Logrank<br>pvalue | DevLIN<br>pvalue |
|---------------------------|-----------------|---------------|---------------|-----------|---------------|---------------|----------------|------------------|-------------------|-------------------|--------------|-------------------|------------------|
| <b>Quintiles</b>          |                 |               |               |           |               |               |                |                  |                   |                   |              |                   |                  |
| < 36.6                    | 20              | 17            | 85.00         | ----      | ----          | ----          | ----           | 0.85             | 5.608e-01         | 1.322             | 2.54e-01     | 2.70e-01          | 2.09e-01         |
| [ 36.6,49.2)              | 19              | 14            | 73.68         | 7.506e-01 | 3.707e-01     | 1.520         | 4.253e-01      | 0.63             | 5.471e-01         |                   |              |                   |                  |
| [ 49.2,65.9)              | 19              | 13            | 68.42         | 7.395e-01 | 3.618e-01     | 1.512         | 4.082e-01      | 0.98             | 8.346e-01         |                   |              |                   |                  |
| [ 65.9,105)               | 20              | 16            | 80.00         | 4.810e-01 | 2.287e-01     | 1.012         | 5.365e-02      | 0.82             | 4.513e-01         | 1.913             |              |                   |                  |
| ≥ 105                     | 21              | 16            | 76.19         | 1.016     | 5.101e-01     | 2.024         | 9.636e-01      | 0.85             | 5.935e-01         | 2.094             |              |                   |                  |
| <b>Quartiles</b>          |                 |               |               |           |               |               |                |                  |                   |                   |              |                   |                  |
| < 39.7                    | 25              | 21            | 84.00         | ----      | ----          | ----          | ----           | 0.90             | 5.800e-01         | 1.322             | 8.19e-01     | 8.25e-01          | 8.42e-01         |
| [ 39.7,54.5)              | 24              | 18            | 75.00         | 8.550e-01 | 4.542e-01     | 1.609         | 6.273e-01      | 0.94             | 6.238e-01         | 2.335             |              |                   |                  |
| [ 54.5,82.8)              | 24              | 16            | 66.67         | 7.731e-01 | 4.014e-01     | 1.489         | 4.417e-01      | 0.98             | 6.046e-01         |                   |              |                   |                  |
| ≥ 82.8                    | 26              | 21            | 80.77         | 1.017     | 5.502e-01     | 1.878         | 9.581e-01      | 0.82             | 6.127e-01         | 1.185             |              |                   |                  |
| <b>Tertiles</b>           |                 |               |               |           |               |               |                |                  |                   |                   |              |                   |                  |
| < 43.9                    | 34              | 28            | 82.35         | ----      | ----          | ----          | ----           | 0.90             | 5.608e-01         | 1.130             | 1.68e-01     | 1.80e-01          | 1.48e-01         |
| [ 43.9,72.3)              | 31              | 21            | 67.74         | 6.477e-01 | 3.635e-01     | 1.154         | 1.406e-01      | 0.98             | 7.990e-01         | 2.335             |              |                   |                  |
| ≥ 72.3                    | 34              | 27            | 79.41         | 1.087     | 6.363e-01     | 1.858         | 7.596e-01      | 0.79             | 5.935e-01         | 1.015             |              |                   |                  |
| <b>Profile Likelihood</b> |                 |               |               |           |               |               |                |                  |                   |                   |              |                   |                  |
| < 37.5                    | 22              | 19            | 86.36         | ----      | ----          | ----          | ----           | 0.85             | 5.608e-01         | 1.081             | 1.58e-01     | 1.46e-01          | 9.12e-02         |
| ≥ 37.5                    | 77              | 57            | 74.03         | 6.722e-01 | 3.936e-01     | 1.148         | 1.457e-01      | 0.85             | 7.278e-01         | 1.117             |              |                   |                  |
| <b>Quantitative</b>       | 99              | 76            | 76.77         | 1.001     | 0.9964        | 1.005         | 7.485e-01      |                  |                   |                   | 7.515e-01    | 7.484e-01         |                  |

**Cohort: Validation**

**Outcome: Progression Free Survival by FVC ( Lung Transplant counts as event )**

**Predictor: Age (years)**

|                           | Patients<br>(N) | Events<br>(n) | Events<br>(%) | HR        | HR<br>95% LCL | HR<br>95% UCL | Wald<br>pvalue | Median<br>(yrs.) | Median<br>95% LCL | Median<br>95% UCL | LR<br>pvalue | Logrank<br>pvalue | DevLIN<br>pvalue |
|---------------------------|-----------------|---------------|---------------|-----------|---------------|---------------|----------------|------------------|-------------------|-------------------|--------------|-------------------|------------------|
| <b>Quintiles</b>          |                 |               |               |           |               |               |                |                  |                   |                   |              |                   |                  |
| < 61.6                    | 19              | 13            | 68.42         | ----      | ----          | ----          | ----           | 1.05             | 7.661e-01         |                   | 1.20e-02     | 2.95e-03          | 2.24e-03         |
| [ 61.6,66.5)              | 20              | 19            | 95.00         | 3.225     | 1.551         | 6.709         | 1.725e-03      | 0.53             | 3.993e-01         | 9.386e-01         |              |                   |                  |
| [ 66.5,70.1)              | 20              | 15            | 75.00         | 1.089     | 5.176e-01     | 2.290         | 8.227e-01      | 0.86             | 6.515e-01         |                   |              |                   |                  |
| [ 70.1,77.1)              | 20              | 14            | 70.00         | 1.095     | 5.096e-01     | 2.351         | 8.167e-01      | 1.13             | 7.990e-01         |                   |              |                   |                  |
| ≥ 77.1                    | 20              | 15            | 75.00         | 1.429     | 6.732e-01     | 3.035         | 3.524e-01      | 0.85             | 7.251e-01         |                   |              |                   |                  |
| <b>Quartiles</b>          |                 |               |               |           |               |               |                |                  |                   |                   |              |                   |                  |
| < 62.8                    | 24              | 17            | 70.83         | ----      | ----          | ----          | ----           | 0.77             | 7.660e-01         | 2.702             | 8.53e-02     | 5.72e-02          | 8.85e-02         |
| [ 62.8,68.4)              | 25              | 23            | 92.00         | 1.895     | 9.973e-01     | 3.602         | 5.096e-02      | 0.60             | 5.202e-01         | 9.770e-01         |              |                   |                  |
| [ 68.4,75)                | 25              | 18            | 72.00         | 9.116e-01 | 4.692e-01     | 1.771         | 7.848e-01      | 0.99             | 7.990e-01         |                   |              |                   |                  |
| ≥ 75                      | 25              | 18            | 72.00         | 9.596e-01 | 4.917e-01     | 1.873         | 9.038e-01      | 1.51             | 7.934e-01         |                   |              |                   |                  |
| <b>Tertiles</b>           |                 |               |               |           |               |               |                |                  |                   |                   |              |                   |                  |
| < 65.3                    | 33              | 26            | 78.79         | ----      | ----          | ----          | ----           | 0.77             | 5.935e-01         | 1.218             | 6.27e-01     | 6.35e-01          | 8.52e-01         |
| [ 65.3,72.8)              | 33              | 27            | 81.82         | 9.596e-01 | 5.590e-01     | 1.647         | 8.811e-01      | 0.86             | 5.285e-01         | 1.130             |              |                   |                  |
| ≥ 72.8                    | 33              | 23            | 69.70         | 7.726e-01 | 4.391e-01     | 1.360         | 3.709e-01      | 1.26             | 7.934e-01         | 2.335             |              |                   |                  |
| <b>Profile Likelihood</b> |                 |               |               |           |               |               |                |                  |                   |                   |              |                   |                  |
| <68.8                     | 52              | 43            | 82.69         | ----      | ----          | ----          | ----           | 0.77             | 5.471e-01         | 9.386e-01         | 3.07e-02     | 2.99e-02          | 1.24e-02         |
| ≥68.8                     | 47              | 33            | 70.21         | 6.064e-01 | 3.842e-01     | 9.571e-01     | 3.171e-02      | 1.26             | 8.538e-01         | 1.913             |              |                   |                  |
| <b>Quantitative</b>       |                 |               |               |           |               |               |                |                  |                   |                   |              |                   |                  |
|                           | 99              | 76            | 76.77         | 9.899e-01 | 9.655e-01     | 1.015         | 4.278e-01      |                  |                   |                   | 4.336e-01    | 4.279e-01         |                  |
| <b>Predictor: Gender</b>  |                 |               |               |           |               |               |                |                  |                   |                   |              |                   |                  |
| Female                    | 34              | 22            | 64.71         | ----      | ----          | ----          | ----           | 1.18             | 0.939             | 3.56              |              |                   |                  |
| Male                      | 65              | 54            | 83.08         | 1.93      | 1.166         | 3.205         | 1.06E-02       | 0.77             | 0.605             | 0.99              | 7.92E-03     | 9.35E-03          |                  |

Cohort: **Validation**

Outcome: **Progression Free Survival by FVC ( Lung Transplant counts as event )**

Predictor: **Baseline (4-month) FVC % Predicted**

|                           | Patients<br>(N) | Events<br>(n) | Events<br>(%) | HR        | HR<br>95% LCL | HR<br>95% UCL | Wald<br>pvalue | Median<br>(yrs.) | Median<br>95% LCL | Median<br>95% UCL | LR<br>pvalue | Logrank<br>pvalue | DevLIN<br>pvalue |
|---------------------------|-----------------|---------------|---------------|-----------|---------------|---------------|----------------|------------------|-------------------|-------------------|--------------|-------------------|------------------|
| <b>Quintiles</b>          |                 |               |               |           |               |               |                |                  |                   |                   |              |                   |                  |
| < 48.7                    | 18              | 16            | 88.89         | ----      | ----          | ----          | ----           | 0.99             | 3.856e-01         | 2.888             | 1.07e-02     | 1.79e-02          | 9.85e-02         |
| [ 48.7,54.9)              | 16              | 15            | 93.75         | 1.604     | 7.828e-01     | 3.285         | 1.968e-01      | 0.63             | 2.677e-01         | 2.094             |              |                   |                  |
| [ 54.9,62)                | 17              | 14            | 82.35         | 1.440     | 6.828e-01     | 3.038         | 3.380e-01      | 0.82             | 5.471e-01         |                   |              |                   |                  |
| [ 62,77.2)                | 17              | 14            | 82.35         | 1.251     | 6.011e-01     | 2.604         | 5.491e-01      | 0.73             | 5.285e-01         | 1.511             |              |                   |                  |
| ≥ 77.2                    | 18              | 9             | 50.00         | 4.315e-01 | 1.896e-01     | 9.821e-01     | 4.517e-02      | 2.20             | 1.264             |                   |              |                   |                  |
| <b>Quartiles</b>          |                 |               |               |           |               |               |                |                  |                   |                   |              |                   |                  |
| < 49.7                    | 21              | 19            | 90.48         | ----      | ----          | ----          | ----           | 1.01             | 4.513e-01         | 2.335             | 6.65e-03     | 9.09e-03          | 3.66e-02         |
| [ 49.7,58.2)              | 22              | 18            | 81.82         | 1.506     | 7.787e-01     | 2.914         | 2.236e-01      | 0.55             | 4.759e-01         | 1.218             |              |                   |                  |
| [ 58.2,72.6)              | 22              | 19            | 86.36         | 1.498     | 7.784e-01     | 2.884         | 2.263e-01      | 0.73             | 5.285e-01         | 9.386e-01         |              |                   |                  |
| ≥ 72.6                    | 21              | 12            | 57.14         | 4.979e-01 | 2.407e-01     | 1.030         | 6.006e-02      | 1.93             | 1.264             |                   |              |                   |                  |
| <b>Tertiles</b>           |                 |               |               |           |               |               |                |                  |                   |                   |              |                   |                  |
| < 51.8                    | 28              | 26            | 92.86         | ----      | ----          | ----          | ----           | 0.79             | 3.856e-01         | 1.218             | 5.48e-03     | 6.99e-03          | 1.10e-01         |
| [ 51.8,67.6)              | 30              | 25            | 83.33         | 1.268     | 7.184e-01     | 2.238         | 4.127e-01      | 0.77             | 5.285e-01         | 9.386e-01         |              |                   |                  |
| ≥ 67.6                    | 28              | 17            | 60.71         | 4.726e-01 | 2.527e-01     | 8.836e-01     | 1.890e-02      | 1.51             | 7.995e-01         |                   |              |                   |                  |
| <b>Profile Likelihood</b> |                 |               |               |           |               |               |                |                  |                   |                   |              |                   |                  |
| < 76.1                    | 68              | 59            | 86.76         | ----      | ----          | ----          | ----           | 0.77             | 6.046e-01         | 9.879e-01         | 7.84e-04     | 1.83e-03          | 2.18e-02         |
| ≥ 76.1                    | 18              | 9             | 50.00         | 3.415e-01 | 1.683e-01     | 6.928e-01     | 2.912e-03      | 2.20             | 1.264             |                   |              |                   |                  |
| <b>Quantitative</b>       | 86              | 68            | 79.07         | 9.846e-01 | 9.723e-01     | 9.971e-01     | 1.561e-02      |                  |                   |                   | 1.383e-02    | 1.480e-02         |                  |

**Cohort: Validation**  
**Outcome: Progression Free Survival by FVC ( Lung Transplant counts as event )**  
**Predictor: Baseline (4-month) DLco % Predicted**

|                           | Patients<br>(N) | Events<br>(n) | Events<br>(%) | HR        | HR<br>95% LCL | HR<br>95% UCL | Wald<br>pvalue | Median<br>(yrs.) | Median<br>95% LCL | Median<br>95% UCL | LR<br>pvalue | Logrank<br>pvalue | DevLIN<br>pvalue |
|---------------------------|-----------------|---------------|---------------|-----------|---------------|---------------|----------------|------------------|-------------------|-------------------|--------------|-------------------|------------------|
| <b>Quintiles</b>          |                 |               |               |           |               |               |                |                  |                   |                   |              |                   |                  |
| < 30.1                    | 17              | 16            | 94.12         | ----      | ----          | ----          | ----           | 0.43             | 3.062e-01         | 1.127             | 4.50e-03     | 1.92e-03          | 4.69e-01         |
| [ 30.1,38.8)              | 15              | 15            | 100.00        | 5.261e-01 | 2.544e-01     | 1.088         | 8.317e-02      | 0.82             | 6.515e-01         | 2.094             |              |                   |                  |
| [ 38.8,46)                | 16              | 13            | 81.25         | 4.722e-01 | 2.208e-01     | 1.010         | 5.310e-02      | 0.77             | 4.977e-01         | 2.702             |              |                   |                  |
| [ 46,62.2)                | 16              | 10            | 62.50         | 2.547e-01 | 1.130e-01     | 5.741e-01     | 9.731e-04      | 1.26             | 8.538e-01         |                   |              |                   |                  |
| ≥ 62.2                    | 17              | 9             | 52.94         | 2.572e-01 | 1.122e-01     | 5.899e-01     | 1.343e-03      | 1.51             | 8.620e-01         |                   |              |                   |                  |
| <b>Quartiles</b>          |                 |               |               |           |               |               |                |                  |                   |                   |              |                   |                  |
| < 31.7                    | 21              | 20            | 95.24         | ----      | ----          | ----          | ----           | 0.59             | 3.068e-01         | 1.180             | 6.50e-03     | 5.49e-03          | 2.49e-02         |
| [ 31.7,43.7)              | 19              | 18            | 94.74         | 7.885e-01 | 4.098e-01     | 1.517         | 4.768e-01      | 0.70             | 4.950e-01         | 1.913             |              |                   |                  |
| [ 43.7,56.5)              | 20              | 12            | 60.00         | 3.257e-01 | 1.556e-01     | 6.817e-01     | 2.912e-03      | 1.56             | 7.660e-01         |                   |              |                   |                  |
| ≥ 56.5                    | 21              | 13            | 61.90         | 4.256e-01 | 2.097e-01     | 8.639e-01     | 1.802e-02      | 0.98             | 8.236e-01         |                   |              |                   |                  |
| <b>Tertiles</b>           |                 |               |               |           |               |               |                |                  |                   |                   |              |                   |                  |
| < 34.6                    | 27              | 26            | 96.30         | ----      | ----          | ----          | ----           | 0.65             | 3.226e-01         | 1.051             | 5.99e-03     | 5.57e-03          | 9.45e-01         |
| [ 34.6,47.8)              | 27              | 23            | 85.19         | 6.294e-01 | 3.544e-01     | 1.118         | 1.141e-01      | 0.77             | 5.285e-01         | 1.913             |              |                   |                  |
| ≥ 47.8                    | 27              | 14            | 51.85         | 3.557e-01 | 1.851e-01     | 6.837e-01     | 1.932e-03      | 1.51             | 9.386e-01         |                   |              |                   |                  |
| <b>Profile Likelihood</b> |                 |               |               |           |               |               |                |                  |                   |                   |              |                   |                  |
| < 42.6                    | 39              | 37            | 94.87         | ----      | ----          | ----          | ----           | 0.65             | 4.710e-01         | 9.879e-01         | 5.05e-04     | 3.96e-04          | 2.15e-01         |
| ≥ 42.6                    | 42              | 26            | 61.90         | 4.083e-01 | 2.449e-01     | 6.807e-01     | 5.935e-04      | 1.26             | 8.538e-01         | 2.888             |              |                   |                  |
| <b>Quantitative</b>       |                 |               |               |           |               |               |                |                  |                   |                   |              |                   |                  |
|                           | 81              | 63            | 77.78         | 9.746e-01 | 9.595e-01     | 9.898e-01     | 1.162e-03      |                  |                   |                   | 4.196e-04    | 1.018e-03         |                  |

**Cohort: Validation**  
**Outcome: Progression Free Survival by FVC ( Lung Transplant counts as event )**  
**Predictor: Baseline (4-month) CPI**

|                           | Patients<br>(N) | Events<br>(n) | Events<br>(%) | HR    | HR<br>95% LCL | HR<br>95% UCL | Wald<br>pvalue | Median<br>(yrs.) | Median<br>95% LCL | Median<br>95% UCL | LR<br>pvalue | Logrank<br>pvalue | DevLIN<br>pvalue |
|---------------------------|-----------------|---------------|---------------|-------|---------------|---------------|----------------|------------------|-------------------|-------------------|--------------|-------------------|------------------|
| <b>Quintiles</b>          |                 |               |               |       |               |               |                |                  |                   |                   |              |                   |                  |
| < 41.2                    | 17              | 9             | 52.94         | ----  | ----          | ----          | ----           | 1.51             | 8.236e-01         |                   | 2.70e-02     | 2.03e-02          | 2.13e-01         |
| [ 41.2,50.9)              | 15              | 10            | 66.67         | 1.177 | 4.762e-01     | 2.908         | 7.243e-01      | 1.26             | 8.538e-01         |                   |              |                   |                  |
| [ 50.9,59.1)              | 17              | 14            | 82.35         | 2.286 | 9.861e-01     | 5.299         | 5.394e-02      | 0.73             | 4.950e-01         |                   |              |                   |                  |
| [ 59.1,65.3)              | 16              | 15            | 93.75         | 1.782 | 7.686e-01     | 4.130         | 1.782e-01      | 0.77             | 4.977e-01         | 2.702             |              |                   |                  |
| ≥ 65.3                    | 16              | 15            | 93.75         | 3.331 | 1.439         | 7.712         | 4.971e-03      | 0.45             | 3.062e-01         | 1.180             |              |                   |                  |
| <b>Quartiles</b>          |                 |               |               |       |               |               |                |                  |                   |                   |              |                   |                  |
| < 44.4                    | 21              | 11            | 52.38         | ----  | ----          | ----          | ----           | 1.13             | 8.236e-01         |                   | 1.33e-02     | 1.28e-02          | 4.22e-01         |
| [ 44.4,55.5)              | 19              | 13            | 68.42         | 1.211 | 5.415e-01     | 2.709         | 6.407e-01      | 0.99             | 8.346e-01         |                   |              |                   |                  |
| [ 55.5,64.1)              | 21              | 20            | 95.24         | 2.470 | 1.172         | 5.208         | 1.748e-02      | 0.70             | 4.950e-01         | 1.563             |              |                   |                  |
| ≥ 64.1                    | 20              | 19            | 95.00         | 2.633 | 1.244         | 5.572         | 1.134e-02      | 0.47             | 3.068e-01         | 1.180             |              |                   |                  |
| <b>Tertiles</b>           |                 |               |               |       |               |               |                |                  |                   |                   |              |                   |                  |
| < 49.9                    | 27              | 16            | 59.26         | ----  | ----          | ----          | ----           | 1.26             | 8.620e-01         |                   | 2.85e-02     | 2.50e-02          | 3.29e-01         |
| [ 49.9,60.6)              | 27              | 21            | 77.78         | 1.463 | 7.597e-01     | 2.816         | 2.552e-01      | 0.77             | 6.046e-01         | 1.927             |              |                   |                  |
| ≥ 60.6                    | 27              | 26            | 96.30         | 2.305 | 1.231         | 4.314         | 9.041e-03      | 0.59             | 3.856e-01         | 1.127             |              |                   |                  |
| <b>Profile Likelihood</b> |                 |               |               |       |               |               |                |                  |                   |                   |              |                   |                  |
| <53.0                     | 36              | 21            | 58.33         | ----  | ----          | ----          | ----           | 1.26             | 8.620e-01         |                   | 3.06e-04     | 3.20e-04          | 2.43e-01         |
| ≥53.0                     | 45              | 42            | 93.33         | 2.585 | 1.513         | 4.418         | 5.137e-04      | 0.70             | 4.759e-01         | 9.879e-01         |              |                   |                  |
| <b>Quantitative</b>       | 81              | 63            | 77.78         | 1.036 | 1.015         | 1.057         | 7.865e-04      |                  |                   |                   | 3.017e-04    | 6.550e-04         |                  |



Cohort: **Validation**

Outcome: **Progression Free Survival by FVC ( Lung Transplant counts as event )**

Predictor: **Baseline (3-month) FVC % Predicted**

|                           | Patients<br>(N) | Events<br>(n) | Events<br>(%) | HR        | HR<br>95% LCL | HR<br>95% UCL | Wald<br>pvalue | Median<br>(yrs.) | Median<br>95% LCL | Median<br>95% UCL | LR<br>pvalue | Logrank<br>pvalue | DevLIN<br>pvalue |
|---------------------------|-----------------|---------------|---------------|-----------|---------------|---------------|----------------|------------------|-------------------|-------------------|--------------|-------------------|------------------|
| <b>Quintiles</b>          |                 |               |               |           |               |               |                |                  |                   |                   |              |                   |                  |
| < 48.9                    | 15              | 13            | 86.67         | ----      | ----          | ----          | ----           | 0.99             | 3.856e-01         |                   | 2.19e-02     | 3.64e-02          | 2.00e-01         |
| [ 48.9,55.7)              | 14              | 12            | 85.71         | 1.352     | 6.097e-01     | 3.000         | 4.576e-01      | 0.77             | 2.677e-01         |                   |              |                   |                  |
| [ 55.7,62)                | 13              | 12            | 92.31         | 1.441     | 6.435e-01     | 3.226         | 3.745e-01      | 0.82             | 4.710e-01         |                   |              |                   |                  |
| [ 62,76.7)                | 16              | 13            | 81.25         | 1.061     | 4.860e-01     | 2.316         | 8.821e-01      | 0.76             | 6.046e-01         | 1.913             |              |                   |                  |
| ≥ 76.7                    | 15              | 8             | 53.33         | 3.830e-01 | 1.575e-01     | 9.314e-01     | 3.428e-02      | 2.20             | 7.995e-01         |                   |              |                   |                  |
| <b>Quartiles</b>          |                 |               |               |           |               |               |                |                  |                   |                   |              |                   |                  |
| < 49.7                    | 18              | 16            | 88.89         | ----      | ----          | ----          | ----           | 0.99             | 3.856e-01         | 2.702             | 1.24e-02     | 1.70e-02          | 8.16e-02         |
| [ 49.7,58.8)              | 18              | 15            | 83.33         | 1.501     | 7.269e-01     | 3.098         | 2.724e-01      | 0.77             | 4.710e-01         | 1.218             |              |                   |                  |
| [ 58.8,73.3)              | 19              | 16            | 84.21         | 1.317     | 6.485e-01     | 2.674         | 4.463e-01      | 0.70             | 5.285e-01         | 1.130             |              |                   |                  |
| ≥ 73.3                    | 18              | 11            | 61.11         | 4.595e-01 | 2.122e-01     | 9.953e-01     | 4.861e-02      | 1.91             | 1.264             |                   |              |                   |                  |
| <b>Tertiles</b>           |                 |               |               |           |               |               |                |                  |                   |                   |              |                   |                  |
| < 51.8                    | 24              | 22            | 91.67         | ----      | ----          | ----          | ----           | 0.79             | 3.856e-01         | 1.218             | 3.48e-03     | 4.47e-03          | 8.11e-02         |
| [ 51.8,68.1)              | 25              | 21            | 84.00         | 1.324     | 7.110e-01     | 2.464         | 3.765e-01      | 0.73             | 4.977e-01         | 9.386e-01         |              |                   |                  |
| ≥ 68.1                    | 24              | 15            | 62.50         | 4.272e-01 | 2.172e-01     | 8.405e-01     | 1.377e-02      | 1.51             | 7.995e-01         |                   |              |                   |                  |
| <b>Profile Likelihood</b> |                 |               |               |           |               |               |                |                  |                   |                   |              |                   |                  |
| < 68.3                    | 49              | 43            | 87.76         | ----      | ----          | ----          | ----           | 0.77             | 5.285e-01         | 9.879e-01         | 1.17e-03     | 1.64e-03          | 3.88e-02         |
| ≥ 68.3                    | 24              | 15            | 62.50         | 3.820e-01 | 2.057e-01     | 7.096e-01     | 2.322e-03      | 1.51             | 7.995e-01         |                   |              |                   |                  |
| <b>Quantitative</b>       |                 |               |               |           |               |               |                |                  |                   |                   |              |                   |                  |
|                           | 73              | 58            | 79.45         | 9.834e-01 | 9.707e-01     | 9.964e-01     | 1.217e-02      |                  |                   |                   | 1.141e-02    | 1.135e-02         |                  |

**Cohort: Validation**

**Outcome: Progression Free Survival by FVC ( Lung Transplant counts as event )**

**Predictor: Baseline (3-month) DLco % Predicted**

|                           | Patients<br>(N) | Events<br>(n) | Events<br>(%) | HR        | HR<br>95% LCL | HR<br>95% UCL | Wald<br>pvalue | Median<br>(yrs.) | Median<br>95% LCL | Median<br>95% UCL | LR<br>pvalue | Logrank<br>pvalue | DevLIN<br>pvalue |
|---------------------------|-----------------|---------------|---------------|-----------|---------------|---------------|----------------|------------------|-------------------|-------------------|--------------|-------------------|------------------|
| <b>Quintiles</b>          |                 |               |               |           |               |               |                |                  |                   |                   |              |                   |                  |
| < 28.6                    | 14              | 13            | 92.86         | ----      | ----          | ----          | ----           | 0.37             | 2.843e-01         | 1.218             | 5.41e-03     | 2.81e-03          | 4.21e-01         |
| [ 28.6,38.3)              | 13              | 13            | 100.00        | 7.647e-01 | 3.497e-01     | 1.672         | 5.015e-01      | 0.70             | 4.595e-01         |                   |              |                   |                  |
| [ 38.3,46)                | 13              | 10            | 76.92         | 4.044e-01 | 1.699e-01     | 9.626e-01     | 4.074e-02      | 0.77             | 5.285e-01         |                   |              |                   |                  |
| [ 46,61.3)                | 14              | 9             | 64.29         | 2.574e-01 | 1.061e-01     | 6.242e-01     | 2.676e-03      | 1.26             | 8.538e-01         |                   |              |                   |                  |
| ≥ 61.3                    | 14              | 8             | 57.14         | 2.651e-01 | 1.076e-01     | 6.530e-01     | 3.897e-03      | 1.51             | 8.620e-01         |                   |              |                   |                  |
| <b>Quartiles</b>          |                 |               |               |           |               |               |                |                  |                   |                   |              |                   |                  |
| < 30.9                    | 18              | 17            | 94.44         | ----      | ----          | ----          | ----           | 0.53             | 3.062e-01         | 1.180             | 4.09e-02     | 2.90e-02          | 3.15e-01         |
| [ 30.9,43.8)              | 16              | 14            | 87.50         | 6.177e-01 | 2.967e-01     | 1.286         | 1.979e-01      | 0.70             | 4.977e-01         | 2.094             |              |                   |                  |
| [ 43.8,55.1)              | 16              | 11            | 68.75         | 4.000e-01 | 1.825e-01     | 8.768e-01     | 2.211e-02      | 1.26             | 7.251e-01         |                   |              |                   |                  |
| ≥ 55.1                    | 18              | 11            | 61.11         | 3.674e-01 | 1.706e-01     | 7.912e-01     | 1.052e-02      | 1.13             | 8.620e-01         |                   |              |                   |                  |
| <b>Tertiles</b>           |                 |               |               |           |               |               |                |                  |                   |                   |              |                   |                  |
| < 33.8                    | 22              | 21            | 95.45         | ----      | ----          | ----          | ----           | 0.59             | 3.068e-01         | 1.127             | 9.55e-03     | 8.26e-03          | 9.42e-01         |
| [ 33.8,47.4)              | 24              | 20            | 83.33         | 5.883e-01 | 3.091e-01     | 1.120         | 1.063e-01      | 0.77             | 5.285e-01         | 2.198             |              |                   |                  |
| ≥ 47.4                    | 22              | 12            | 54.55         | 3.377e-01 | 1.649e-01     | 6.913e-01     | 2.979e-03      | 1.39             | 9.386e-01         |                   |              |                   |                  |
| <b>Profile Likelihood</b> |                 |               |               |           |               |               |                |                  |                   |                   |              |                   |                  |
| < 39.5                    | 28              | 27            | 96.43         | ----      | ----          | ----          | ----           | 0.50             | 3.856e-01         | 1.007             | 1.34e-04     | 5.73e-05          | 4.38e-02         |
| ≥ 39.5                    | 40              | 26            | 65.00         | 3.260e-01 | 1.838e-01     | 5.781e-01     | 1.256e-04      | 1.26             | 8.620e-01         | 2.702             |              |                   |                  |
| <b>Quantitative</b>       | 68              | 53            | 77.94         | 9.744e-01 | 9.584e-01     | 9.907e-01     | 2.167e-03      |                  |                   |                   | 8.811e-04    | 1.932e-03         |                  |

**Cohort: Validation**  
**Outcome: Progression Free Survival by FVC ( Lung Transplant counts as event )**  
**Predictor: Baseline (3-month) CPI**

|                           | Patients<br>(N) | Events<br>(n) | Events<br>(%) | HR    | HR<br>95% LCL | HR<br>95% UCL | Wald<br>pvalue | Median<br>(yrs.) | Median<br>95% LCL | Median<br>95% UCL | LR<br>pvalue | Logrank<br>pvalue | DevLIN<br>pvalue |
|---------------------------|-----------------|---------------|---------------|-------|---------------|---------------|----------------|------------------|-------------------|-------------------|--------------|-------------------|------------------|
| <b>Quintiles</b>          |                 |               |               |       |               |               |                |                  |                   |                   |              |                   |                  |
| < 42.9                    | 14              | 8             | 57.14         | ----  | ----          | ----          | ----           | 1.13             | 8.236e-01         |                   | 4.22e-02     | 3.15e-02          | 2.06e-01         |
| [ 42.9,51.7)              | 13              | 9             | 69.23         | 1.043 | 3.987e-01     | 2.728         | 9.320e-01      | 1.55             | 9.386e-01         |                   |              |                   |                  |
| [ 51.7,59.8)              | 14              | 10            | 71.43         | 1.366 | 5.362e-01     | 3.481         | 5.133e-01      | 0.77             | 5.285e-01         |                   |              |                   |                  |
| [ 59.8,66)                | 14              | 14            | 100.00        | 2.548 | 1.058         | 6.141         | 3.708e-02      | 0.62             | 4.595e-01         | 2.094             |              |                   |                  |
| ≥ 66                      | 13              | 12            | 92.31         | 2.876 | 1.154         | 7.169         | 2.336e-02      | 0.47             | 2.843e-01         |                   |              |                   |                  |
| <b>Quartiles</b>          |                 |               |               |       |               |               |                |                  |                   |                   |              |                   |                  |
| < 45.4                    | 18              | 11            | 61.11         | ----  | ----          | ----          | ----           | 1.26             | 8.620e-01         |                   | 1.07e-02     | 6.79e-03          | 6.93e-01         |
| [ 45.4,56)                | 16              | 10            | 62.50         | 1.168 | 4.943e-01     | 2.761         | 7.232e-01      | 0.99             | 7.660e-01         |                   |              |                   |                  |
| [ 56,64.8)                | 17              | 16            | 94.12         | 2.050 | 9.431e-01     | 4.456         | 6.999e-02      | 0.73             | 5.285e-01         | 2.094             |              |                   |                  |
| ≥ 64.8                    | 17              | 16            | 94.12         | 3.368 | 1.525         | 7.441         | 2.671e-03      | 0.47             | 3.062e-01         | 1.127             |              |                   |                  |
| <b>Tertiles</b>           |                 |               |               |       |               |               |                |                  |                   |                   |              |                   |                  |
| < 50.3                    | 22              | 14            | 63.64         | ----  | ----          | ----          | ----           | 1.39             | 9.386e-01         |                   | 4.36e-03     | 2.13e-03          | 3.93e-01         |
| [ 50.3,62.2)              | 24              | 18            | 75.00         | 1.342 | 6.620e-01     | 2.721         | 4.144e-01      | 0.82             | 6.515e-01         | 2.702             |              |                   |                  |
| ≥ 62.2                    | 22              | 21            | 95.45         | 3.073 | 1.539         | 6.136         | 1.461e-03      | 0.47             | 3.068e-01         | 1.051             |              |                   |                  |
| <b>Profile Likelihood</b> |                 |               |               |       |               |               |                |                  |                   |                   |              |                   |                  |
| <53.0                     | 29              | 17            | 58.62         | ----  | ----          | ----          | ----           | 1.51             | 9.386e-01         |                   | 2.06e-04     | 2.14e-04          | 1.14e-01         |
| ≥53.0                     | 39              | 36            | 92.31         | 2.934 | 1.618         | 5.322         | 3.947e-04      | 0.70             | 4.759e-01         | 9.879e-01         |              |                   |                  |
| <b>Quantitative</b>       | 68              | 53            | 77.94         | 1.037 | 1.014         | 1.060         | 1.401e-03      |                  |                   |                   | 5.430e-04    | 1.163e-03         |                  |

**Cohort: Validation**  
**Outcome: Progression Free Survival by FVC ( Lung Transplant counts as event )**  
**Predictor: MMP7Elisa ( ng / mL )**

|                           | Patients<br>(N) | Events<br>(n) | Events<br>(%) | HR        | HR<br>95% LCL | HR<br>95% UCL | Wald<br>pvalue | Median<br>(yrs.) | Median<br>95% LCL | Median<br>95% UCL | LR<br>pvalue | Logrank<br>pvalue | DevLIN<br>pvalue |
|---------------------------|-----------------|---------------|---------------|-----------|---------------|---------------|----------------|------------------|-------------------|-------------------|--------------|-------------------|------------------|
| <b>Quintiles</b>          |                 |               |               |           |               |               |                |                  |                   |                   |              |                   |                  |
| < 3.41                    | 19              | 14            | 73.68         | ----      | ----          | ----          | ----           | 0.85             | 7.990e-01         |                   | 3.39e-01     | 3.07e-01          | 3.57e-01         |
| [ 3.41,4.56)              | 19              | 13            | 68.42         | 7.281e-01 | 3.391e-01     | 1.563         | 4.157e-01      | 1.13             | 7.251e-01         |                   |              |                   |                  |
| [ 4.56,5.49)              | 20              | 14            | 70.00         | 7.387e-01 | 3.484e-01     | 1.566         | 4.296e-01      | 0.99             | 4.595e-01         |                   |              |                   |                  |
| [ 5.49,7.52)              | 20              | 17            | 85.00         | 1.446     | 7.058e-01     | 2.961         | 3.137e-01      | 0.58             | 4.710e-01         | 1.051             |              |                   |                  |
| ≥ 7.52                    | 21              | 18            | 85.71         | 9.994e-01 | 4.917e-01     | 2.031         | 9.986e-01      | 1.18             | 6.515e-01         | 1.927             |              |                   |                  |
| <b>Quartiles</b>          |                 |               |               |           |               |               |                |                  |                   |                   |              |                   |                  |
| < 3.54                    | 24              | 17            | 70.83         | ----      | ----          | ----          | ----           | 0.94             | 8.236e-01         |                   | 4.61e-01     | 4.60e-01          | 2.99e-01         |
| [ 3.54,4.94)              | 24              | 15            | 62.50         | 9.741e-01 | 4.849e-01     | 1.957         | 9.412e-01      | 1.13             | 6.790e-01         |                   |              |                   |                  |
| [ 4.94,6.46)              | 25              | 21            | 84.00         | 1.402     | 7.370e-01     | 2.668         | 3.030e-01      | 0.58             | 3.856e-01         | 2.094             |              |                   |                  |
| ≥ 6.46                    | 26              | 23            | 88.46         | 1.458     | 7.762e-01     | 2.738         | 2.412e-01      | 0.82             | 6.515e-01         | 1.552             |              |                   |                  |
| <b>Tertiles</b>           |                 |               |               |           |               |               |                |                  |                   |                   |              |                   |                  |
| < 3.99                    | 33              | 22            | 66.67         | ----      | ----          | ----          | ----           | 0.98             | 8.236e-01         |                   | 2.91e-01     | 2.85e-01          | 1.60e-01         |
| [ 3.99,5.91)              | 32              | 25            | 78.12         | 1.235     | 6.941e-01     | 2.199         | 4.724e-01      | 0.73             | 4.950e-01         | 2.045             |              |                   |                  |
| ≥ 5.91                    | 34              | 29            | 85.29         | 1.558     | 8.929e-01     | 2.720         | 1.185e-01      | 0.79             | 5.285e-01         | 1.264             |              |                   |                  |
| <b>Profile Likelihood</b> |                 |               |               |           |               |               |                |                  |                   |                   |              |                   |                  |
| < 4.7                     | 43              | 28            | 65.12         | ----      | ----          | ----          | ----           | 0.99             | 8.236e-01         | 1.913             | 4.18e-02     | 4.29e-02          | 2.46e-02         |
| ≥ 4.7                     | 56              | 48            | 85.71         | 1.614     | 1.010         | 2.578         | 4.522e-02      | 0.77             | 5.202e-01         | 1.051             |              |                   |                  |
| <b>Quantitative</b>       |                 |               |               |           |               |               |                |                  |                   |                   |              |                   |                  |
|                           | 99              | 76            | 76.77         | 1.013     | 9.543e-01     | 1.076         | 6.682e-01      |                  |                   |                   | 6.735e-01    | 6.681e-01         |                  |

**Cohort: Validation**  
**Outcome: Progression Free Survival by FVC ( Lung Transplant counts as event )**  
**Predictor: ICAM ( ng / mL )**

|                           | Patients<br>(N) | Events<br>(n) | Events<br>(%) | HR        | HR<br>95% LCL | HR<br>95% UCL | Wald<br>pvalue | Median<br>(yrs.) | Median<br>95% LCL | Median<br>95% UCL | LR<br>pvalue | Logrank<br>pvalue | DevLIN<br>pvalue |
|---------------------------|-----------------|---------------|---------------|-----------|---------------|---------------|----------------|------------------|-------------------|-------------------|--------------|-------------------|------------------|
| <b>Quintiles</b>          |                 |               |               |           |               |               |                |                  |                   |                   |              |                   |                  |
| < 226                     | 20              | 13            | 65.00         | ----      | ----          | ----          | ----           | 0.86             | 7.990e-01         |                   | 4.01e-02     | 3.82e-02          | 1.60e-01         |
| [ 226,281)                | 20              | 12            | 60.00         | 7.829e-01 | 3.555e-01     | 1.724         | 5.434e-01      | 1.18             | 9.770e-01         |                   |              |                   |                  |
| [ 281,326)                | 18              | 14            | 77.78         | 1.552     | 7.157e-01     | 3.366         | 2.657e-01      | 0.85             | 4.595e-01         |                   |              |                   |                  |
| [ 326,419)                | 20              | 18            | 90.00         | 2.222     | 1.076         | 4.587         | 3.085e-02      | 0.58             | 4.759e-01         | 1.322             |              |                   |                  |
| ≥ 419                     | 21              | 19            | 90.48         | 1.647     | 8.008e-01     | 3.387         | 1.750e-01      | 0.77             | 5.935e-01         | 2.094             |              |                   |                  |
| <b>Quartiles</b>          |                 |               |               |           |               |               |                |                  |                   |                   |              |                   |                  |
| < 238                     | 25              | 16            | 64.00         | ----      | ----          | ----          | ----           | 0.86             | 7.995e-01         |                   | 1.01e-02     | 8.49e-03          | 5.37e-02         |
| [ 238,303)                | 24              | 14            | 58.33         | 8.633e-01 | 4.201e-01     | 1.774         | 6.891e-01      | 1.70             | 9.770e-01         |                   |              |                   |                  |
| [ 303,387)                | 24              | 23            | 95.83         | 2.263     | 1.187         | 4.316         | 1.314e-02      | 0.58             | 4.595e-01         | 1.051             |              |                   |                  |
| ≥ 387                     | 26              | 23            | 88.46         | 1.781     | 9.311e-01     | 3.408         | 8.108e-02      | 0.76             | 5.285e-01         | 1.563             |              |                   |                  |
| <b>Tertiles</b>           |                 |               |               |           |               |               |                |                  |                   |                   |              |                   |                  |
| < 258                     | 34              | 20            | 58.82         | ----      | ----          | ----          | ----           | 1.13             | 8.346e-01         |                   | 4.24e-03     | 5.83e-03          | 5.50e-02         |
| [ 258,367)                | 31              | 25            | 80.65         | 2.349     | 1.272         | 4.339         | 6.375e-03      | 0.77             | 5.471e-01         | 1.322             |              |                   |                  |
| ≥ 367                     | 34              | 31            | 91.18         | 2.310     | 1.298         | 4.113         | 4.432e-03      | 0.70             | 5.202e-01         | 1.511             |              |                   |                  |
| <b>Profile Likelihood</b> |                 |               |               |           |               |               |                |                  |                   |                   |              |                   |                  |
| <262.0                    | 35              | 20            | 57.14         | ----      | ----          | ----          | ----           | 1.13             | 8.620e-01         |                   | 5.22e-04     | 7.54e-04          | 8.09e-03         |
| ≥262.0                    | 64              | 56            | 87.50         | 2.419     | 1.424         | 4.110         | 1.082e-03      | 0.73             | 5.800e-01         | 9.879e-01         |              |                   |                  |
| <b>Quantitative</b>       | 99              | 76            | 76.77         | 1.002     | 1.000         | 1.005         | 2.079e-02      |                  |                   |                   | 2.284e-02    | 2.004e-02         |                  |

Cohort: **Validation**

Outcome: **Progression Free Survival by FVC ( Lung Transplant counts as event )**

Predictor: **IL8 ( ng / mL )**

|                           | Patients<br>(N) | Events<br>(n) | Events<br>(%) | HR        | HR<br>95% LCL | HR<br>95% UCL | Wald<br>pvalue | Median<br>(yrs.) | Median<br>95% LCL | Median<br>95% UCL | LR<br>pvalue | Logrank<br>pvalue | DevLIN<br>pvalue |
|---------------------------|-----------------|---------------|---------------|-----------|---------------|---------------|----------------|------------------|-------------------|-------------------|--------------|-------------------|------------------|
| <b>Quintiles</b>          |                 |               |               |           |               |               |                |                  |                   |                   |              |                   |                  |
| < 0.00767                 | 19              | 14            | 73.68         | ----      | ----          | ----          | ----           | 0.77             | 7.032e-01         |                   | 8.96e-01     | 8.95e-01          | 8.95e-01         |
| [ 0.00767,0.0101)         | 20              | 17            | 85.00         | 1.385     | 6.210e-01     | 3.087         | 4.264e-01      | 0.86             | 7.251e-01         |                   |              |                   |                  |
| [ 0.0101,0.0131)          | 18              | 12            | 66.67         | 1.365     | 6.650e-01     | 2.801         | 3.965e-01      | 0.55             | 4.349e-01         |                   |              |                   |                  |
| [ 0.0131,0.0178)          | 20              | 18            | 90.00         | 1.089     | 5.096e-01     | 2.328         | 8.255e-01      | 0.83             | 7.990e-01         | 2.335             |              |                   |                  |
| ≥ 0.0178                  | 20              | 14            | 70.00         | 1.215     | 5.811e-01     | 2.540         | 6.050e-01      | 0.99             | 5.935e-01         |                   |              |                   |                  |
| <b>Quartiles</b>          |                 |               |               |           |               |               |                |                  |                   |                   |              |                   |                  |
| < 0.00825                 | 24              | 19            | 79.17         | ----      | ----          | ----          | ----           | 0.77             | 6.515e-01         | 2.198             | 6.05e-01     | 5.81e-01          | 5.21e-01         |
| [ 0.00825,0.0112)         | 24              | 18            | 75.00         | 1.404     | 7.364e-01     | 2.676         | 3.028e-01      | 0.82             | 5.800e-01         |                   |              |                   |                  |
| [ 0.0112,0.0164)          | 24              | 20            | 83.33         | 9.176e-01 | 4.768e-01     | 1.766         | 7.968e-01      | 0.80             | 4.710e-01         | 1.697             |              |                   |                  |
| ≥ 0.0164                  | 25              | 18            | 72.00         | 1.056     | 5.437e-01     | 2.052         | 8.716e-01      | 1.13             | 7.661e-01         | 2.888             |              |                   |                  |
| <b>Tertiles</b>           |                 |               |               |           |               |               |                |                  |                   |                   |              |                   |                  |
| < 0.00959                 | 32              | 24            | 75.00         | ----      | ----          | ----          | ----           | 0.86             | 7.660e-01         | 1.322             | 5.83e-01     | 5.73e-01          | 5.75e-01         |
| [ 0.00959,0.015)          | 32              | 26            | 81.25         | 1.077     | 6.108e-01     | 1.899         | 7.975e-01      | 0.79             | 5.471e-01         | 1.697             |              |                   |                  |
| ≥ 0.015                   | 33              | 25            | 75.76         | 1.336     | 7.577e-01     | 2.357         | 3.164e-01      | 0.99             | 7.634e-01         | 1.563             |              |                   |                  |
| <b>Profile Likelihood</b> |                 |               |               |           |               |               |                |                  |                   |                   |              |                   |                  |
| < 0.0092                  | 28              | 20            | 71.43         | ----      | ----          | ----          | ----           | 0.94             | 7.660e-01         |                   | 2.25e-01     | 2.33e-01          | 1.81e-01         |
| ≥ 0.0092                  | 69              | 55            | 79.71         | 1.372     | 8.125e-01     | 2.318         | 2.365e-01      | 0.82             | 6.790e-01         | 1.180             |              |                   |                  |
| <b>Quantitative*</b>      |                 |               |               |           |               |               |                |                  |                   |                   |              |                   |                  |
|                           | 97              | 75            | 77.32         | 1.003     | 9.740e-01     | 1.034         | 8.189e-01      |                  |                   |                   | 8.217e-01    | 8.190e-01         |                  |

\*Units of pg / mL were used in **Quantitative model only**.

**Cohort: Validation**

**Outcome: Progression Free Survival by FVC ( Lung Transplant counts as event )**

**Predictor: VCAM ( ng / mL )**

|                           | Patients<br>(N) | Events<br>(n) | Events<br>(%) | HR        | HR<br>95% LCL | HR<br>95% UCL | Wald<br>pvalue | Median<br>(yrs.) | Median<br>95% LCL | Median<br>95% UCL | LR<br>pvalue | Logrank<br>pvalue | DevLIN<br>pvalue |
|---------------------------|-----------------|---------------|---------------|-----------|---------------|---------------|----------------|------------------|-------------------|-------------------|--------------|-------------------|------------------|
| <b>Quintiles</b>          |                 |               |               |           |               |               |                |                  |                   |                   |              |                   |                  |
| < 222                     | 20              | 17            | 85.00         | ----      | ----          | ----          | ----           | 0.82             | 7.661e-01         |                   | 5.91e-01     | 5.96e-01          | 5.95e-01         |
| [ 222,260)                | 20              | 17            | 85.00         | 1.134     | 5.760e-01     | 2.233         | 7.157e-01      | 0.79             | 5.471e-01         | 2.198             |              |                   |                  |
| [ 260,310)                | 19              | 12            | 63.16         | 7.224e-01 | 3.434e-01     | 1.519         | 3.913e-01      | 0.99             | 7.660e-01         |                   |              |                   |                  |
| [ 310,376)                | 20              | 14            | 70.00         | 7.104e-01 | 3.488e-01     | 1.447         | 3.462e-01      | 1.26             | 7.251e-01         |                   |              |                   |                  |
| ≥ 376                     | 20              | 16            | 80.00         | 1.048     | 5.256e-01     | 2.088         | 8.949e-01      | 0.76             | 5.202e-01         |                   |              |                   |                  |
| <b>Quartiles</b>          |                 |               |               |           |               |               |                |                  |                   |                   |              |                   |                  |
| < 230                     | 25              | 22            | 88.00         | ----      | ----          | ----          | ----           | 0.82             | 6.515e-01         | 2.198             | 9.28e-01     | 9.28e-01          | 9.32e-01         |
| [ 230,285)                | 24              | 17            | 70.83         | 9.011e-01 | 4.755e-01     | 1.708         | 7.495e-01      | 0.85             | 7.660e-01         |                   |              |                   |                  |
| [ 285,358)                | 25              | 18            | 72.00         | 8.066e-01 | 4.308e-01     | 1.510         | 5.018e-01      | 1.18             | 6.046e-01         | 2.094             |              |                   |                  |
| ≥ 358                     | 25              | 19            | 76.00         | 9.174e-01 | 4.957e-01     | 1.698         | 7.836e-01      | 0.76             | 5.800e-01         | 2.335             |              |                   |                  |
| <b>Tertiles</b>           |                 |               |               |           |               |               |                |                  |                   |                   |              |                   |                  |
| < 246                     | 34              | 30            | 88.24         | ----      | ----          | ----          | ----           | 0.80             | 6.515e-01         | 1.051             | 2.60e-01     | 2.60e-01          | 2.32e-01         |
| [ 246,334)                | 32              | 20            | 62.50         | 6.243e-01 | 3.535e-01     | 1.102         | 1.044e-01      | 0.99             | 8.620e-01         | 2.370             |              |                   |                  |
| ≥ 334                     | 33              | 26            | 78.79         | 8.096e-01 | 4.774e-01     | 1.373         | 4.330e-01      | 0.77             | 5.935e-01         | 1.913             |              |                   |                  |
| <b>Profile Likelihood</b> |                 |               |               |           |               |               |                |                  |                   |                   |              |                   |                  |
| <246.8                    | 34              | 30            | 88.24         | ----      | ----          | ----          | ----           | 0.80             | 6.515e-01         | 1.051             | 1.65e-01     | 1.56e-01          | 9.51e-02         |
| ≥246.8                    | 65              | 46            | 70.77         | 7.171e-01 | 4.514e-01     | 1.139         | 1.590e-01      | 0.99             | 7.634e-01         | 1.563             |              |                   |                  |
| <b>Quantitative</b>       | 99              | 76            | 76.77         | 0.9998    | 0.9977        | 1.002         | 8.614e-01      |                  |                   |                   | 8.606e-01    | 8.614e-01         |                  |

**Cohort: Validation**  
**Outcome: Progression Free Survival by FVC ( Lung Transplant counts as event )**  
**Predictor: S100A12 ( ng / mL )**

|                           | Patients<br>(N) | Events<br>(n) | Events<br>(%) | HR        | HR<br>95% LCL | HR<br>95% UCL | Wald<br>pvalue | Median<br>(yrs.) | Median<br>95% LCL | Median<br>95% UCL | LR<br>pvalue | Logrank<br>pvalue | DevLIN<br>pvalue |
|---------------------------|-----------------|---------------|---------------|-----------|---------------|---------------|----------------|------------------|-------------------|-------------------|--------------|-------------------|------------------|
| <b>Quintiles</b>          |                 |               |               |           |               |               |                |                  |                   |                   |              |                   |                  |
| < 36.6                    | 20              | 15            | 75.00         | ----      | ----          | ----          | ----           | 0.82             | 7.251e-01         | 1.697             | 1.09e-01     | 9.03e-02          | 3.61e-02         |
| [ 36.6,49.2)              | 19              | 12            | 63.16         | 7.435e-01 | 3.579e-01     | 1.544         | 4.268e-01      | 1.26             | 9.386e-01         |                   |              |                   |                  |
| [ 49.2,65.9)              | 19              | 13            | 68.42         | 5.427e-01 | 2.515e-01     | 1.171         | 1.193e-01      | 1.05             | 6.515e-01         |                   |              |                   |                  |
| [ 65.9,105)               | 20              | 19            | 95.00         | 6.158e-01 | 2.900e-01     | 1.308         | 2.071e-01      | 0.77             | 4.513e-01         | 1.180             |              |                   |                  |
| ≥ 105                     | 21              | 17            | 80.95         | 1.314     | 6.653e-01     | 2.595         | 4.317e-01      | 0.70             | 4.349e-01         | 2.094             |              |                   |                  |
| <b>Quartiles</b>          |                 |               |               |           |               |               |                |                  |                   |                   |              |                   |                  |
| < 39.7                    | 25              | 18            | 72.00         | ----      | ----          | ----          | ----           | 0.86             | 7.634e-01         | 1.697             | 3.80e-01     | 4.03e-01          | 3.46e-01         |
| [ 39.7,54.5)              | 24              | 16            | 66.67         | 6.561e-01 | 3.311e-01     | 1.300         | 2.271e-01      | 2.20             | 8.346e-01         |                   |              |                   |                  |
| [ 54.5,82.8)              | 24              | 20            | 83.33         | 1.138     | 5.987e-01     | 2.164         | 6.928e-01      | 0.80             | 5.202e-01         | 1.511             |              |                   |                  |
| ≥ 82.8                    | 26              | 22            | 84.62         | 9.910e-01 | 5.196e-01     | 1.890         | 9.782e-01      | 0.77             | 4.710e-01         | 1.552             |              |                   |                  |
| <b>Tertiles</b>           |                 |               |               |           |               |               |                |                  |                   |                   |              |                   |                  |
| < 43.9                    | 34              | 24            | 70.59         | ----      | ----          | ----          | ----           | 0.99             | 8.236e-01         | 1.697             | 3.13e-01     | 3.02e-01          | 5.25e-01         |
| [ 43.9,72.3)              | 31              | 22            | 70.97         | 8.967e-01 | 5.016e-01     | 1.603         | 7.130e-01      | 1.05             | 7.661e-01         | 2.370             |              |                   |                  |
| ≥ 72.3                    | 34              | 30            | 88.24         | 1.356     | 7.860e-01     | 2.341         | 2.735e-01      | 0.70             | 4.349e-01         | 1.007             |              |                   |                  |
| <b>Profile Likelihood</b> |                 |               |               |           |               |               |                |                  |                   |                   |              |                   |                  |
| < 64.8                    | 57              | 39            | 68.42         | ----      | ----          | ----          | ----           | 1.05             | 8.236e-01         | 1.697             | 1.24e-01     | 1.20e-01          | 2.48e-01         |
| ≥ 64.8                    | 42              | 37            | 88.10         | 1.434     | 9.086e-01     | 2.262         | 1.216e-01      | 0.77             | 5.285e-01         | 1.007             |              |                   |                  |
| <b>Quantitative</b>       |                 |               |               |           |               |               |                |                  |                   |                   |              |                   |                  |
|                           | 99              | 76            | 76.77         | 1.002     | 0.998         | 1.007         | 2.856e-01      |                  |                   |                   | 3.014e-01    | 2.851e-01         |                  |



**Cohort: Validation**

**Outcome: Progression Free Survival by DLCO ( Lung Transplant counts as event )**

**Predictor: Age (years)**

|                           | Patients<br>(N) | Events<br>(n) | Events<br>(%) | HR    | HR<br>95% LCL | HR<br>95% UCL | Wald<br>pvalue | Median<br>(yrs.) | Median<br>95% LCL | Median<br>95% UCL | LR<br>pvalue | Logrank<br>pvalue | DevLIN<br>pvalue |
|---------------------------|-----------------|---------------|---------------|-------|---------------|---------------|----------------|------------------|-------------------|-------------------|--------------|-------------------|------------------|
| <b>Quintiles</b>          |                 |               |               |       |               |               |                |                  |                   |                   |              |                   |                  |
| < 61.6                    | 19              | 13            | 68.42         | ----  | ----          | ----          | ----           | 1.61             | 7.661e-01         |                   | 5.09e-02     | 4.50e-02          | 2.11e-02         |
| [ 61.6,66.5)              | 20              | 18            | 90.00         | 3.084 | 1.467         | 6.483         | 2.961e-03      | 0.55             | 3.993e-01         | 1.180             |              |                   |                  |
| [ 66.5,70.1)              | 20              | 18            | 90.00         | 1.777 | 8.579e-01     | 3.680         | 1.218e-01      | 0.83             | 3.993e-01         | 2.045             |              |                   |                  |
| [ 70.1,77.1)              | 20              | 17            | 85.00         | 1.610 | 7.693e-01     | 3.369         | 2.063e-01      | 1.02             | 7.990e-01         |                   |              |                   |                  |
| ≥ 77.1                    | 20              | 18            | 90.00         | 2.018 | 9.586e-01     | 4.249         | 6.450e-02      | 0.90             | 7.934e-01         | 1.552             |              |                   |                  |
| <b>Quartiles</b>          |                 |               |               |       |               |               |                |                  |                   |                   |              |                   |                  |
| < 62.8                    | 24              | 16            | 66.67         | ----  | ----          | ----          | ----           | 0.95             | 7.660e-01         |                   | 3.39e-02     | 2.56e-02          | 3.98e-02         |
| [ 62.8,68.4)              | 25              | 24            | 96.00         | 2.607 | 1.357         | 5.009         | 4.025e-03      | 0.55             | 3.993e-01         | 8.620e-01         |              |                   |                  |
| [ 68.4,75)                | 25              | 22            | 88.00         | 1.520 | 7.873e-01     | 2.934         | 2.123e-01      | 0.98             | 6.895e-01         | 1.130             |              |                   |                  |
| ≥ 75                      | 25              | 22            | 88.00         | 1.474 | 7.621e-01     | 2.851         | 2.490e-01      | 1.02             | 8.235e-01         | 1.514             |              |                   |                  |
| <b>Tertiles</b>           |                 |               |               |       |               |               |                |                  |                   |                   |              |                   |                  |
| < 65.3                    | 33              | 25            | 75.76         | ----  | ----          | ----          | ----           | 0.77             | 5.935e-01         | 2.094             | 4.06e-01     | 4.07e-01          | 4.92e-01         |
| [ 65.3,72.8)              | 33              | 30            | 90.91         | 1.446 | 8.419e-01     | 2.482         | 1.815e-01      | 0.82             | 4.759e-01         | 1.081             |              |                   |                  |
| ≥ 72.8                    | 33              | 29            | 87.88         | 1.231 | 7.152e-01     | 2.120         | 4.527e-01      | 0.90             | 7.990e-01         | 1.511             |              |                   |                  |
| <b>Profile Likelihood</b> |                 |               |               |       |               |               |                |                  |                   |                   |              |                   |                  |
| <62.6                     | 23              | 15            | 65.22         | ----  | ----          | ----          | ----           | 1.61             | 7.660e-01         |                   | 2.07e-02     | 2.71e-02          | 3.91e-03         |
| ≥62.6                     | 76              | 69            | 90.79         | 1.887 | 1.065         | 3.343         | 2.947e-02      | 0.82             | 6.895e-01         | 1.007             |              |                   |                  |
| <b>Quantitative</b>       |                 |               |               |       |               |               |                |                  |                   |                   |              |                   |                  |
|                           | 99              | 84            | 84.85         | 1.008 | 9.839e-01     | 1.033         | 5.172e-01      |                  |                   |                   | 5.137e-01    | 5.172e-01         |                  |
| <b>Predictor: Gender</b>  |                 |               |               |       |               |               |                |                  |                   |                   |              |                   |                  |
| Female                    | 34              | 26            | 76.47         | ----  | ----          | ----          | ----           | 1.13             | 0.793             | 2.33              |              |                   |                  |
| Male                      | 65              | 58            | 89.23         | 1.63  | 1.019         | 2.611         | 4.16E-02       | 0.80             | 0.665             | 0.95              | 3.66E-02     | 3.94E-02          |                  |

**Cohort: Validation**  
**Outcome: Progression Free Survival by DLCO ( Lung Transplant counts as event )**  
**Predictor: Baseline (4-month) FVC % Predicted**

|                           | Patients<br>(N) | Events<br>(n) | Events<br>(%) | HR        | HR<br>95% LCL | HR<br>95% UCL | Wald<br>pvalue | Median<br>(yrs.) | Median<br>95% LCL | Median<br>95% UCL | LR<br>pvalue | Logrank<br>pvalue | DevLIN<br>pvalue |
|---------------------------|-----------------|---------------|---------------|-----------|---------------|---------------|----------------|------------------|-------------------|-------------------|--------------|-------------------|------------------|
| <b>Quintiles</b>          |                 |               |               |           |               |               |                |                  |                   |                   |              |                   |                  |
| < 48.7                    | 18              | 16            | 88.89         | ----      | ----          | ----          | ----           | 0.79             | 5.258e-01         | 2.335             | 1.81e-01     | 1.91e-01          | 4.53e-01         |
| [ 48.7,54.9)              | 16              | 16            | 100.00        | 1.075     | 5.360e-01     | 2.155         | 8.390e-01      | 0.77             | 4.513e-01         | 2.094             |              |                   |                  |
| [ 54.9,62)                | 17              | 16            | 94.12         | 1.442     | 7.093e-01     | 2.930         | 3.121e-01      | 0.77             | 4.787e-01         | 1.117             |              |                   |                  |
| [ 62,77.2)                | 17              | 14            | 82.35         | 9.014e-01 | 4.351e-01     | 1.868         | 7.801e-01      | 0.86             | 5.285e-01         |                   |              |                   |                  |
| ≥ 77.2                    | 18              | 13            | 72.22         | 5.709e-01 | 2.685e-01     | 1.214         | 1.454e-01      | 1.08             | 8.127e-01         |                   |              |                   |                  |
| <b>Quartiles</b>          |                 |               |               |           |               |               |                |                  |                   |                   |              |                   |                  |
| < 49.7                    | 21              | 19            | 90.48         | ----      | ----          | ----          | ----           | 0.95             | 5.258e-01         | 1.563             | 8.57e-02     | 9.41e-02          | 2.54e-01         |
| [ 49.7,58.2)              | 22              | 22            | 100.00        | 1.378     | 7.425e-01     | 2.558         | 3.094e-01      | 0.69             | 4.787e-01         | 9.358e-01         |              |                   |                  |
| [ 58.2,72.6)              | 22              | 18            | 81.82         | 1.088     | 5.653e-01     | 2.095         | 8.004e-01      | 0.77             | 3.993e-01         | 1.398             |              |                   |                  |
| ≥ 72.6                    | 21              | 16            | 76.19         | 6.004e-01 | 3.038e-01     | 1.186         | 1.420e-01      | 1.47             | 8.346e-01         |                   |              |                   |                  |
| <b>Tertiles</b>           |                 |               |               |           |               |               |                |                  |                   |                   |              |                   |                  |
| < 51.8                    | 28              | 26            | 92.86         | ----      | ----          | ----          | ----           | 0.79             | 5.258e-01         | 1.415             | 7.76e-03     | 7.39e-03          | 2.50e-02         |
| [ 51.8,67.6)              | 30              | 28            | 93.33         | 1.517     | 8.739e-01     | 2.632         | 1.387e-01      | 0.73             | 5.285e-01         | 9.030e-01         |              |                   |                  |
| ≥ 67.6                    | 28              | 21            | 75.00         | 5.961e-01 | 3.293e-01     | 1.079         | 8.764e-02      | 1.40             | 8.346e-01         | 2.198             |              |                   |                  |
| <b>Profile Likelihood</b> |                 |               |               |           |               |               |                |                  |                   |                   |              |                   |                  |
| < 69.0                    | 59              | 55            | 93.22         | ----      | ----          | ----          | ----           | 0.77             | 5.471e-01         | 9.358e-01         | 3.18e-03     | 4.25e-03          | 2.94e-03         |
| ≥ 69.0                    | 27              | 20            | 74.07         | 4.655e-01 | 2.722e-01     | 7.960e-01     | 5.217e-03      | 1.47             | 8.346e-01         | 2.198             |              |                   |                  |
| <b>Quantitative</b>       |                 |               |               |           |               |               |                |                  |                   |                   |              |                   |                  |
|                           | 86              | 75            | 87.21         | 9.898e-01 | 9.775e-01     | 1.002         | 1.093e-01      |                  |                   |                   | 1.069e-01    | 1.084e-01         |                  |

**Cohort: Validation**

**Outcome: Progression Free Survival by DLCO ( Lung Transplant counts as event )**

**Predictor: Baseline (4-month) DLco % Predicted**

|                           | Patients<br>(N) | Events<br>(n) | Events<br>(%) | HR        | HR<br>95% LCL | HR<br>95% UCL | Wald<br>pvalue | Median<br>(yrs.) | Median<br>95% LCL | Median<br>95% UCL | LR<br>pvalue | Logrank<br>pvalue | DevLIN<br>pvalue |
|---------------------------|-----------------|---------------|---------------|-----------|---------------|---------------|----------------|------------------|-------------------|-------------------|--------------|-------------------|------------------|
| <b>Quintiles</b>          |                 |               |               |           |               |               |                |                  |                   |                   |              |                   |                  |
| < 30.1                    | 17              | 17            | 100.00        | ----      | ----          | ----          | ----           | 0.34             | 3.062e-01         | 1.117             | 8.02e-02     | 4.22e-02          | 2.61e-01         |
| [ 30.1,38.8)              | 15              | 14            | 93.33         | 4.996e-01 | 2.433e-01     | 1.026         | 5.879e-02      | 0.83             | 5.258e-01         | 2.094             |              |                   |                  |
| [ 38.8,46)                | 16              | 13            | 81.25         | 4.242e-01 | 2.039e-01     | 8.824e-01     | 2.175e-02      | 0.95             | 7.660e-01         |                   |              |                   |                  |
| [ 46,62.2)                | 16              | 12            | 75.00         | 3.564e-01 | 1.684e-01     | 7.545e-01     | 7.013e-03      | 0.98             | 7.661e-01         |                   |              |                   |                  |
| ≥ 62.2                    | 17              | 14            | 82.35         | 4.649e-01 | 2.241e-01     | 9.644e-01     | 3.965e-02      | 0.90             | 5.800e-01         |                   |              |                   |                  |
| <b>Quartiles</b>          |                 |               |               |           |               |               |                |                  |                   |                   |              |                   |                  |
| < 31.7                    | 21              | 20            | 95.24         | ----      | ----          | ----          | ----           | 0.59             | 3.068e-01         | 1.180             | 1.97e-01     | 1.98e-01          | 2.61e-01         |
| [ 31.7,43.7)              | 19              | 17            | 89.47         | 9.817e-01 | 5.107e-01     | 1.887         | 9.558e-01      | 0.82             | 5.258e-01         | 1.415             |              |                   |                  |
| [ 43.7,56.5)              | 20              | 16            | 80.00         | 5.370e-01 | 2.771e-01     | 1.041         | 6.549e-02      | 1.40             | 7.661e-01         |                   |              |                   |                  |
| ≥ 56.5                    | 21              | 17            | 80.95         | 6.829e-01 | 3.503e-01     | 1.331         | 2.629e-01      | 0.90             | 5.800e-01         |                   |              |                   |                  |
| <b>Tertiles</b>           |                 |               |               |           |               |               |                |                  |                   |                   |              |                   |                  |
| < 34.6                    | 27              | 26            | 96.30         | ----      | ----          | ----          | ----           | 0.59             | 3.226e-01         | 1.117             | 1.12e-01     | 9.69e-02          | 5.58e-01         |
| [ 34.6,47.8)              | 27              | 24            | 88.89         | 6.289e-01 | 3.599e-01     | 1.099         | 1.035e-01      | 0.94             | 7.661e-01         | 1.609             |              |                   |                  |
| ≥ 47.8                    | 27              | 20            | 74.07         | 5.495e-01 | 3.028e-01     | 9.973e-01     | 4.898e-02      | 0.90             | 6.895e-01         | 1.552             |              |                   |                  |
| <b>Profile Likelihood</b> |                 |               |               |           |               |               |                |                  |                   |                   |              |                   |                  |
| < 30.1                    | 17              | 17            | 100.00        | ----      | ----          | ----          | ----           | 0.34             | 3.062e-01         | 1.117             | 6.15e-03     | 2.43e-03          | 3.99e-02         |
| ≥ 30.1                    | 64              | 53            | 82.81         | 4.327e-01 | 2.478e-01     | 7.557e-01     | 3.230e-03      | 0.94             | 8.127e-01         | 1.415             |              |                   |                  |
| <b>Quantitative</b>       | 81              | 70            | 86.42         | 9.876e-01 | 9.740e-01     | 1.001         | 7.633e-02      |                  |                   |                   | 6.645e-02    | 7.543e-02         |                  |

**Cohort: Validation**  
**Outcome: Progression Free Survival by DLCO ( Lung Transplant counts as event )**  
**Predictor: Baseline (4-month) CPI**

|                           | Patients<br>(N) | Events<br>(n) | Events<br>(%) | HR    | HR<br>95% LCL | HR<br>95% UCL | Wald<br>pvalue | Median<br>(yrs.) | Median<br>95% LCL | Median<br>95% UCL | LR<br>pvalue | Logrank<br>pvalue | DevLIN<br>pvalue |
|---------------------------|-----------------|---------------|---------------|-------|---------------|---------------|----------------|------------------|-------------------|-------------------|--------------|-------------------|------------------|
| <b>Quintiles</b>          |                 |               |               |       |               |               |                |                  |                   |                   |              |                   |                  |
| < 41.2                    | 17              | 13            | 76.47         | ----  | ----          | ----          | ----           | 1.08             | 8.127e-01         |                   | 5.59e-01     | 5.42e-01          | 6.95e-01         |
| [ 41.2,50.9)              | 15              | 12            | 80.00         | 1.060 | 4.725e-01     | 2.376         | 8.883e-01      | 0.92             | 7.995e-01         |                   |              |                   |                  |
| [ 50.9,59.1)              | 17              | 15            | 88.24         | 1.326 | 6.196e-01     | 2.836         | 4.677e-01      | 0.77             | 6.647e-01         |                   |              |                   |                  |
| [ 59.1,65.3)              | 16              | 15            | 93.75         | 1.433 | 6.654e-01     | 3.084         | 3.582e-01      | 0.82             | 5.258e-01         | 2.094             |              |                   |                  |
| ≥ 65.3                    | 16              | 15            | 93.75         | 1.809 | 8.407e-01     | 3.892         | 1.295e-01      | 0.39             | 3.062e-01         | 1.180             |              |                   |                  |
| <b>Quartiles</b>          |                 |               |               |       |               |               |                |                  |                   |                   |              |                   |                  |
| < 44.4                    | 21              | 15            | 71.43         | ----  | ----          | ----          | ----           | 1.08             | 5.800e-01         |                   | 2.31e-01     | 2.31e-01          | 9.49e-01         |
| [ 44.4,55.5)              | 19              | 16            | 84.21         | 1.192 | 5.810e-01     | 2.445         | 6.320e-01      | 0.85             | 7.995e-01         | 1.913             |              |                   |                  |
| [ 55.5,64.1)              | 21              | 20            | 95.24         | 1.716 | 8.624e-01     | 3.416         | 1.240e-01      | 0.77             | 5.285e-01         | 1.398             |              |                   |                  |
| ≥ 64.1                    | 20              | 19            | 95.00         | 1.860 | 9.276e-01     | 3.730         | 8.041e-02      | 0.43             | 3.068e-01         | 1.180             |              |                   |                  |
| <b>Tertiles</b>           |                 |               |               |       |               |               |                |                  |                   |                   |              |                   |                  |
| < 49.9                    | 27              | 20            | 74.07         | ----  | ----          | ----          | ----           | 1.08             | 8.127e-01         | 2.198             | 9.89e-02     | 9.18e-02          | 8.26e-01         |
| [ 49.9,60.6)              | 27              | 24            | 88.89         | 1.332 | 7.283e-01     | 2.437         | 3.518e-01      | 0.82             | 7.251e-01         | 1.609             |              |                   |                  |
| ≥ 60.6                    | 27              | 26            | 96.30         | 1.909 | 1.053         | 3.460         | 3.322e-02      | 0.59             | 3.363e-01         | 1.117             |              |                   |                  |
| <b>Profile Likelihood</b> |                 |               |               |       |               |               |                |                  |                   |                   |              |                   |                  |
| <59.8                     | 52              | 42            | 80.77         | ----  | ----          | ----          | ----           | 0.90             | 7.995e-01         | 1.511             | 2.64e-02     | 2.13e-02          | 3.25e-01         |
| ≥59.8                     | 29              | 28            | 96.55         | 1.753 | 1.080         | 2.847         | 2.325e-02      | 0.59             | 3.471e-01         | 1.007             |              |                   |                  |
| <b>Quantitative</b>       | 81              | 70            | 86.42         | 1.020 | 1.001         | 1.039         | 3.895e-02      |                  |                   |                   | 3.251e-02    | 3.802e-02         |                  |

**Cohort: Validation**  
**Outcome: Progression Free Survival by DLCO ( Lung Transplant counts as event )**  
**Predictor: Baseline (3-month) FVC % Predicted**

|                           | Patients<br>(N) | Events<br>(n) | Events<br>(%) | HR        | HR<br>95% LCL | HR<br>95% UCL | Wald<br>pvalue | Median<br>(yrs.) | Median<br>95% LCL | Median<br>95% UCL | LR<br>pvalue | Logrank<br>pvalue | DevLIN<br>pvalue |
|---------------------------|-----------------|---------------|---------------|-----------|---------------|---------------|----------------|------------------|-------------------|-------------------|--------------|-------------------|------------------|
| <b>Quintiles</b>          |                 |               |               |           |               |               |                |                  |                   |                   |              |                   |                  |
| < 48.9                    | 15              | 13            | 86.67         | ----      | ----          | ----          | ----           | 0.79             | 5.258e-01         |                   | 3.62e-01     | 3.76e-01          | 6.86e-01         |
| [ 48.9,55.7)              | 14              | 14            | 100.00        | 1.049     | 4.909e-01     | 2.242         | 9.016e-01      | 0.77             | 4.759e-01         | 2.094             |              |                   |                  |
| [ 55.7,62)                | 13              | 12            | 92.31         | 1.240     | 5.589e-01     | 2.749         | 5.971e-01      | 0.82             | 3.993e-01         |                   |              |                   |                  |
| [ 62,76.7)                | 16              | 13            | 81.25         | 7.796e-01 | 3.575e-01     | 1.700         | 5.315e-01      | 1.13             | 7.251e-01         |                   |              |                   |                  |
| ≥ 76.7                    | 15              | 12            | 80.00         | 5.688e-01 | 2.531e-01     | 1.278         | 1.719e-01      | 1.08             | 7.995e-01         |                   |              |                   |                  |
| <b>Quartiles</b>          |                 |               |               |           |               |               |                |                  |                   |                   |              |                   |                  |
| < 49.7                    | 18              | 16            | 88.89         | ----      | ----          | ----          | ----           | 0.95             | 5.935e-01         | 1.609             | 6.57e-02     | 5.26e-02          | 1.72e-01         |
| [ 49.7,58.8)              | 18              | 18            | 100.00        | 1.773     | 8.907e-01     | 3.527         | 1.030e-01      | 0.73             | 4.349e-01         | 9.358e-01         |              |                   |                  |
| [ 58.8,73.3)              | 19              | 15            | 78.95         | 1.037     | 5.072e-01     | 2.122         | 9.199e-01      | 0.77             | 3.993e-01         |                   |              |                   |                  |
| ≥ 73.3                    | 18              | 15            | 83.33         | 6.666e-01 | 3.241e-01     | 1.371         | 2.703e-01      | 1.47             | 8.127e-01         | 2.198             |              |                   |                  |
| <b>Tertiles</b>           |                 |               |               |           |               |               |                |                  |                   |                   |              |                   |                  |
| < 51.8                    | 24              | 22            | 91.67         | ----      | ----          | ----          | ----           | 0.79             | 5.258e-01         | 1.563             | 7.31e-03     | 6.37e-03          | 2.06e-02         |
| [ 51.8,68.1)              | 25              | 23            | 92.00         | 1.670     | 9.015e-01     | 3.094         | 1.030e-01      | 0.73             | 4.759e-01         | 9.358e-01         |              |                   |                  |
| ≥ 68.1                    | 24              | 19            | 79.17         | 5.910e-01 | 3.133e-01     | 1.115         | 1.044e-01      | 1.47             | 8.127e-01         | 2.198             |              |                   |                  |
| <b>Profile Likelihood</b> |                 |               |               |           |               |               |                |                  |                   |                   |              |                   |                  |
| < 68.3                    | 49              | 45            | 91.84         | ----      | ----          | ----          | ----           | 0.77             | 5.285e-01         | 9.495e-01         | 7.41e-03     | 8.94e-03          | 9.20e-03         |
| ≥ 68.3                    | 24              | 19            | 79.17         | 4.786e-01 | 2.723e-01     | 8.414e-01     | 1.047e-02      | 1.47             | 8.127e-01         | 2.198             |              |                   |                  |
| <b>Quantitative</b>       |                 |               |               |           |               |               |                |                  |                   |                   |              |                   |                  |
|                           | 73              | 64            | 87.67         | 9.900e-01 | 9.769e-01     | 1.003         | 1.373e-01      |                  |                   |                   | 1.361e-01    | 1.363e-01         |                  |

**Cohort: Validation**  
**Outcome: Progression Free Survival by DLCO ( Lung Transplant counts as event )**  
**Predictor: Baseline (3-month) DLco % Predicted**

|                           | Patients<br>(N) | Events<br>(n) | Events<br>(%) | HR        | HR<br>95% LCL | HR<br>95% UCL | Wald<br>pvalue | Median<br>(yrs.) | Median<br>95% LCL | Median<br>95% UCL | LR<br>pvalue | Logrank<br>pvalue | DevLIN<br>pvalue |
|---------------------------|-----------------|---------------|---------------|-----------|---------------|---------------|----------------|------------------|-------------------|-------------------|--------------|-------------------|------------------|
| <b>Quintiles</b>          |                 |               |               |           |               |               |                |                  |                   |                   |              |                   |                  |
| < 28.6                    | 14              | 14            | 100.00        | ----      | ----          | ----          | ----           | 0.32             | 2.843e-01         | 1.180             | 1.31e-01     | 8.91e-02          | 3.67e-01         |
| [ 28.6,38.3)              | 13              | 12            | 92.31         | 6.149e-01 | 2.808e-01     | 1.347         | 2.241e-01      | 0.77             | 3.637e-01         |                   |              |                   |                  |
| [ 38.3,46)                | 13              | 10            | 76.92         | 3.768e-01 | 1.652e-01     | 8.594e-01     | 2.034e-02      | 1.40             | 9.358e-01         |                   |              |                   |                  |
| [ 46,61.3)                | 14              | 11            | 78.57         | 3.985e-01 | 1.789e-01     | 8.877e-01     | 2.434e-02      | 0.98             | 7.661e-01         |                   |              |                   |                  |
| ≥ 61.3                    | 14              | 12            | 85.71         | 4.794e-01 | 2.153e-01     | 1.067         | 7.185e-02      | 0.86             | 5.800e-01         |                   |              |                   |                  |
| <b>Quartiles</b>          |                 |               |               |           |               |               |                |                  |                   |                   |              |                   |                  |
| < 30.9                    | 18              | 17            | 94.44         | ----      | ----          | ----          | ----           | 0.51             | 3.062e-01         | 1.180             | 4.70e-01     | 4.48e-01          | 4.75e-01         |
| [ 30.9,43.8)              | 16              | 14            | 87.50         | 7.453e-01 | 3.653e-01     | 1.520         | 4.190e-01      | 0.94             | 5.258e-01         |                   |              |                   |                  |
| [ 43.8,55.1)              | 16              | 13            | 81.25         | 5.743e-01 | 2.779e-01     | 1.187         | 1.344e-01      | 1.40             | 7.661e-01         |                   |              |                   |                  |
| ≥ 55.1                    | 18              | 15            | 83.33         | 6.450e-01 | 3.151e-01     | 1.320         | 2.302e-01      | 0.86             | 6.265e-01         |                   |              |                   |                  |
| <b>Tertiles</b>           |                 |               |               |           |               |               |                |                  |                   |                   |              |                   |                  |
| < 33.8                    | 22              | 21            | 95.45         | ----      | ----          | ----          | ----           | 0.43             | 3.068e-01         | 1.127             | 2.48e-01     | 2.29e-01          | 8.03e-01         |
| [ 33.8,47.4)              | 24              | 21            | 87.50         | 6.700e-01 | 3.642e-01     | 1.233         | 1.978e-01      | 0.95             | 7.661e-01         | 1.609             |              |                   |                  |
| ≥ 47.4                    | 22              | 17            | 77.27         | 5.872e-01 | 3.042e-01     | 1.133         | 1.125e-01      | 1.08             | 6.895e-01         | 1.552             |              |                   |                  |
| <b>Profile Likelihood</b> |                 |               |               |           |               |               |                |                  |                   |                   |              |                   |                  |
| < 30.1                    | 16              | 16            | 100.00        | ----      | ----          | ----          | ----           | 0.39             | 2.843e-01         | 1.127             | 9.46e-03     | 4.47e-03          | 5.23e-02         |
| ≥ 30.1                    | 52              | 43            | 82.69         | 4.364e-01 | 2.426e-01     | 7.852e-01     | 5.656e-03      | 0.98             | 8.235e-01         | 1.511             |              |                   |                  |
| <b>Quantitative</b>       | 68              | 59            | 86.76         | 9.873e-01 | 9.726e-01     | 1.002         | 9.466e-02      |                  |                   |                   | 8.355e-02    | 9.374e-02         |                  |

**Cohort: Validation**

**Outcome: Progression Free Survival by DLCO ( Lung Transplant counts as event )**

**Predictor: Baseline (3-month) CPI**

|                           | Patients<br>(N) | Events<br>(n) | Events<br>(%) | HR        | HR<br>95% LCL | HR<br>95% UCL | Wald<br>pvalue | Median<br>(yrs.) | Median<br>95% LCL | Median<br>95% UCL | LR<br>pvalue | Logrank<br>pvalue | DevLIN<br>pvalue |
|---------------------------|-----------------|---------------|---------------|-----------|---------------|---------------|----------------|------------------|-------------------|-------------------|--------------|-------------------|------------------|
| <b>Quintiles</b>          |                 |               |               |           |               |               |                |                  |                   |                   |              |                   |                  |
| < 42.9                    | 14              | 12            | 85.71         | ----      | ----          | ----          | ----           | 0.86             | 5.800e-01         |                   | 1.83e-01     | 1.50e-01          | 5.68e-02         |
| [ 42.9,51.7)              | 13              | 10            | 76.92         | 8.040e-01 | 3.363e-01     | 1.922         | 6.238e-01      | 1.51             | 8.236e-01         |                   |              |                   |                  |
| [ 51.7,59.8)              | 14              | 11            | 78.57         | 7.758e-01 | 3.344e-01     | 1.800         | 5.545e-01      | 1.40             | 7.251e-01         |                   |              |                   |                  |
| [ 59.8,66)                | 14              | 14            | 100.00        | 1.838     | 8.226e-01     | 4.109         | 1.378e-01      | 0.68             | 3.637e-01         | 1.563             |              |                   |                  |
| ≥ 66                      | 13              | 12            | 92.31         | 1.381     | 6.022e-01     | 3.167         | 4.460e-01      | 0.43             | 2.843e-01         |                   |              |                   |                  |
| <b>Quartiles</b>          |                 |               |               |           |               |               |                |                  |                   |                   |              |                   |                  |
| < 45.4                    | 18              | 14            | 77.78         | ----      | ----          | ----          | ----           | 1.13             | 8.127e-01         |                   | 1.80e-01     | 1.72e-01          | 8.24e-01         |
| [ 45.4,56)                | 16              | 13            | 81.25         | 1.252     | 5.791e-01     | 2.707         | 5.678e-01      | 0.98             | 7.661e-01         |                   |              |                   |                  |
| [ 56,64.8)                | 17              | 16            | 94.12         | 1.721     | 8.220e-01     | 3.601         | 1.499e-01      | 0.82             | 5.285e-01         | 1.927             |              |                   |                  |
| ≥ 64.8                    | 17              | 16            | 94.12         | 2.159     | 1.032         | 4.518         | 4.112e-02      | 0.43             | 3.062e-01         | 1.127             |              |                   |                  |
| <b>Tertiles</b>           |                 |               |               |           |               |               |                |                  |                   |                   |              |                   |                  |
| < 50.3                    | 22              | 17            | 77.27         | ----      | ----          | ----          | ----           | 1.47             | 8.236e-01         | 2.198             | 8.69e-02     | 8.11e-02          | 6.33e-01         |
| [ 50.3,62.2)              | 24              | 21            | 87.50         | 1.432     | 7.458e-01     | 2.750         | 2.806e-01      | 0.85             | 7.251e-01         | 1.563             |              |                   |                  |
| ≥ 62.2                    | 22              | 21            | 95.45         | 2.087     | 1.083         | 4.022         | 2.798e-02      | 0.53             | 3.068e-01         | 1.117             |              |                   |                  |
| <b>Profile Likelihood</b> |                 |               |               |           |               |               |                |                  |                   |                   |              |                   |                  |
| <59.8                     | 41              | 33            | 80.49         | ----      | ----          | ----          | ----           | 1.08             | 8.127e-01         | 1.552             | 2.10e-02     | 1.71e-02          | 2.16e-01         |
| ≥59.8                     | 27              | 26            | 96.30         | 1.873     | 1.109         | 3.164         | 1.894e-02      | 0.59             | 3.471e-01         | 1.007             |              |                   |                  |
| <b>Quantitative</b>       | 68              | 59            | 86.76         | 1.020     | 9.996e-01     | 1.041         | 5.430e-02      |                  |                   |                   | 4.590e-02    | 5.315e-02         |                  |

**Cohort: Validation**

**Outcome: Progression Free Survival by DLCO ( Lung Transplant counts as event )**

**Predictor: MMP7Elisa ( ng / mL )**

|                           | Patients<br>(N) | Events<br>(n) | Events<br>(%) | HR        | HR<br>95% LCL | HR<br>95% UCL | Wald<br>pvalue | Median<br>(yrs.) | Median<br>95% LCL | Median<br>95% UCL | LR<br>pvalue | Logrank<br>pvalue | DevLIN<br>pvalue |
|---------------------------|-----------------|---------------|---------------|-----------|---------------|---------------|----------------|------------------|-------------------|-------------------|--------------|-------------------|------------------|
| <b>Quintiles</b>          |                 |               |               |           |               |               |                |                  |                   |                   |              |                   |                  |
| < 3.41                    | 19              | 15            | 78.95         | ----      | ----          | ----          | ----           | 0.80             | 6.265e-01         |                   | 9.24e-01     | 9.27e-01          | 8.38e-01         |
| [ 3.41,4.56)              | 19              | 15            | 78.95         | 7.680e-01 | 3.675e-01     | 1.605         | 4.827e-01      | 1.05             | 6.895e-01         |                   |              |                   |                  |
| [ 4.56,5.49)              | 20              | 18            | 90.00         | 9.346e-01 | 4.619e-01     | 1.891         | 8.509e-01      | 0.98             | 5.258e-01         | 2.198             |              |                   |                  |
| [ 5.49,7.52)              | 20              | 17            | 85.00         | 1.006     | 4.908e-01     | 2.061         | 9.873e-01      | 0.79             | 4.759e-01         | 1.609             |              |                   |                  |
| ≥ 7.52                    | 21              | 19            | 90.48         | 1.021     | 5.075e-01     | 2.053         | 9.539e-01      | 0.95             | 4.787e-01         | 1.552             |              |                   |                  |
| <b>Quartiles</b>          |                 |               |               |           |               |               |                |                  |                   |                   |              |                   |                  |
| < 3.54                    | 24              | 18            | 75.00         | ----      | ----          | ----          | ----           | 0.85             | 7.990e-01         |                   | 4.84e-01     | 4.87e-01          | 2.06e-01         |
| [ 3.54,4.94)              | 24              | 20            | 83.33         | 1.496     | 7.773e-01     | 2.880         | 2.279e-01      | 0.90             | 6.790e-01         | 1.127             |              |                   |                  |
| [ 4.94,6.46)              | 25              | 22            | 88.00         | 1.149     | 6.077e-01     | 2.173         | 6.687e-01      | 0.99             | 5.258e-01         | 2.094             |              |                   |                  |
| ≥ 6.46                    | 26              | 24            | 92.31         | 1.520     | 8.138e-01     | 2.841         | 1.889e-01      | 0.82             | 4.787e-01         | 1.415             |              |                   |                  |
| <b>Tertiles</b>           |                 |               |               |           |               |               |                |                  |                   |                   |              |                   |                  |
| < 3.99                    | 33              | 25            | 75.76         | ----      | ----          | ----          | ----           | 0.85             | 7.661e-01         | 1.511             | 5.74e-01     | 5.80e-01          | 4.15e-01         |
| [ 3.99,5.91)              | 32              | 30            | 93.75         | 1.291     | 7.539e-01     | 2.212         | 3.516e-01      | 0.90             | 6.647e-01         | 1.398             |              |                   |                  |
| ≥ 5.91                    | 34              | 29            | 85.29         | 1.281     | 7.438e-01     | 2.207         | 3.717e-01      | 0.82             | 4.787e-01         | 1.470             |              |                   |                  |
| <b>Profile Likelihood</b> |                 |               |               |           |               |               |                |                  |                   |                   |              |                   |                  |
| < 3.5                     | 26              | 20            | 76.92         | ----      | ----          | ----          | ----           | 0.85             | 7.990e-01         | 2.335             | 2.10e-01     | 2.20e-01          | 1.54e-01         |
| ≥ 3.5                     | 73              | 64            | 87.67         | 1.377     | 8.234e-01     | 2.304         | 2.226e-01      | 0.83             | 6.895e-01         | 1.117             |              |                   |                  |
| <b>Quantitative</b>       |                 |               |               |           |               |               |                |                  |                   |                   |              |                   |                  |
|                           | 99              | 84            | 84.85         | 1.001     | 9.433e-01     | 1.062         | 9.723e-01      |                  |                   |                   | 9.723e-01    | 9.723e-01         |                  |



**Cohort: Validation**  
**Outcome: Progression Free Survival by DLCO ( Lung Transplant counts as event )**  
**Predictor: ICAM ( ng / mL )**

|                           | Patients<br>(N) | Events<br>(n) | Events<br>(%) | HR        | HR<br>95% LCL | HR<br>95% UCL | Wald<br>pvalue | Median<br>(yrs.) | Median<br>95% LCL | Median<br>95% UCL | LR<br>pvalue | Logrank<br>pvalue | DevLIN<br>pvalue |
|---------------------------|-----------------|---------------|---------------|-----------|---------------|---------------|----------------|------------------|-------------------|-------------------|--------------|-------------------|------------------|
| <b>Quintiles</b>          |                 |               |               |           |               |               |                |                  |                   |                   |              |                   |                  |
| < 226                     | 20              | 15            | 75.00         | ----      | ----          | ----          | ----           | 0.86             | 7.990e-01         |                   | 9.95e-02     | 5.39e-02          | 7.40e-02         |
| [ 226,281)                | 20              | 18            | 90.00         | 1.090     | 5.412e-01     | 2.197         | 8.088e-01      | 0.94             | 8.236e-01         | 2.198             |              |                   |                  |
| [ 281,326)                | 18              | 13            | 72.22         | 1.071     | 4.964e-01     | 2.309         | 8.620e-01      | 0.77             | 4.513e-01         |                   |              |                   |                  |
| [ 326,419)                | 20              | 19            | 95.00         | 2.401     | 1.184         | 4.871         | 1.519e-02      | 0.53             | 3.993e-01         | 1.322             |              |                   |                  |
| ≥ 419                     | 21              | 19            | 90.48         | 1.145     | 5.688e-01     | 2.303         | 7.051e-01      | 1.19             | 6.790e-01         | 2.094             |              |                   |                  |
| <b>Quartiles</b>          |                 |               |               |           |               |               |                |                  |                   |                   |              |                   |                  |
| < 238                     | 25              | 19            | 76.00         | ----      | ----          | ----          | ----           | 0.86             | 7.990e-01         | 1.398             | 2.16e-01     | 1.88e-01          | 1.74e-01         |
| [ 238,303)                | 24              | 19            | 79.17         | 9.831e-01 | 5.150e-01     | 1.877         | 9.588e-01      | 1.02             | 8.127e-01         | 2.198             |              |                   |                  |
| [ 303,387)                | 24              | 22            | 91.67         | 1.790     | 9.517e-01     | 3.365         | 7.086e-02      | 0.55             | 4.349e-01         | 1.322             |              |                   |                  |
| ≥ 387                     | 26              | 24            | 92.31         | 1.261     | 6.800e-01     | 2.338         | 4.619e-01      | 0.95             | 5.935e-01         | 1.563             |              |                   |                  |
| <b>Tertiles</b>           |                 |               |               |           |               |               |                |                  |                   |                   |              |                   |                  |
| < 258                     | 34              | 27            | 79.41         | ----      | ----          | ----          | ----           | 1.01             | 8.127e-01         | 1.398             | 2.05e-01     | 2.16e-01          | 2.47e-01         |
| [ 258,367)                | 31              | 25            | 80.65         | 1.531     | 8.728e-01     | 2.686         | 1.374e-01      | 0.77             | 5.471e-01         | 1.322             |              |                   |                  |
| ≥ 367                     | 34              | 32            | 94.12         | 1.521     | 8.974e-01     | 2.577         | 1.193e-01      | 0.79             | 5.285e-01         | 1.511             |              |                   |                  |
| <b>Profile Likelihood</b> |                 |               |               |           |               |               |                |                  |                   |                   |              |                   |                  |
| <291.7                    | 45              | 35            | 77.78         | ----      | ----          | ----          | ----           | 0.98             | 8.236e-01         | 1.180             | 3.12e-02     | 3.14e-02          | 2.12e-02         |
| ≥291.7                    | 54              | 49            | 90.74         | 1.622     | 1.039         | 2.531         | 3.313e-02      | 0.68             | 5.285e-01         | 9.879e-01         |              |                   |                  |
| <b>Quantitative</b>       | 99              | 84            | 84.85         | 1.001     | 0.999         | 1.003         | 3.187e-01      |                  |                   |                   | 3.222e-01    | 3.182e-01         |                  |

Cohort: **Validation**

Outcome: **Progression Free Survival by DLCO ( Lung Transplant counts as event )**

Predictor: **IL8 ( ng / mL )**

|                           | Patients<br>(N) | Events<br>(n) | Events<br>(%) | HR    | HR<br>95% LCL | HR<br>95% UCL | Wald<br>pvalue | Median<br>(yrs.) | Median<br>95% LCL | Median<br>95% UCL | LR<br>pvalue | Logrank<br>pvalue | DevLIN<br>pvalue |
|---------------------------|-----------------|---------------|---------------|-------|---------------|---------------|----------------|------------------|-------------------|-------------------|--------------|-------------------|------------------|
| <b>Quintiles</b>          |                 |               |               |       |               |               |                |                  |                   |                   |              |                   |                  |
| < 0.00767                 | 19              | 15            | 78.95         | ----  | ----          | ----          | ----           | 0.98             | 6.895e-01         |                   | 2.25e-01     | 2.16e-01          | 2.75e-01         |
| [ 0.00767,0.0101)         | 20              | 17            | 85.00         | 1.793 | 8.243e-01     | 3.898         | 1.409e-01      | 0.82             | 7.661e-01         | 2.370             |              |                   |                  |
| [ 0.0101,0.0131)          | 18              | 14            | 77.78         | 2.194 | 1.060         | 4.542         | 3.429e-02      | 0.55             | 4.513e-01         |                   |              |                   |                  |
| [ 0.0131,0.0178)          | 20              | 19            | 95.00         | 1.544 | 7.381e-01     | 3.232         | 2.486e-01      | 0.80             | 5.285e-01         | 1.415             |              |                   |                  |
| ≥ 0.0178                  | 20              | 17            | 85.00         | 1.217 | 5.869e-01     | 2.525         | 5.972e-01      | 0.98             | 7.661e-01         | 1.552             |              |                   |                  |
| <b>Quartiles</b>          |                 |               |               |       |               |               |                |                  |                   |                   |              |                   |                  |
| < 0.00825                 | 24              | 20            | 83.33         | ----  | ----          | ----          | ----           | 0.86             | 6.895e-01         | 4.055             | 1.73e-01     | 1.50e-01          | 2.18e-01         |
| [ 0.00825,0.0112)         | 24              | 19            | 79.17         | 2.061 | 1.080         | 3.934         | 2.831e-02      | 0.81             | 5.800e-01         | 2.045             |              |                   |                  |
| [ 0.0112,0.0164)          | 24              | 22            | 91.67         | 1.348 | 7.040e-01     | 2.580         | 3.678e-01      | 0.58             | 4.513e-01         | 9.495e-01         |              |                   |                  |
| ≥ 0.0164                  | 25              | 21            | 84.00         | 1.299 | 6.695e-01     | 2.521         | 4.391e-01      | 0.99             | 9.030e-01         | 1.514             |              |                   |                  |
| <b>Tertiles</b>           |                 |               |               |       |               |               |                |                  |                   |                   |              |                   |                  |
| < 0.00959                 | 32              | 25            | 78.12         | ----  | ----          | ----          | ----           | 0.86             | 7.661e-01         | 2.198             | 1.22e-01     | 1.33e-01          | 1.37e-01         |
| [ 0.00959,0.015)          | 32              | 28            | 87.50         | 1.685 | 9.587e-01     | 2.960         | 6.980e-02      | 0.73             | 5.285e-01         | 1.180             |              |                   |                  |
| ≥ 0.015                   | 33              | 29            | 87.88         | 1.632 | 9.273e-01     | 2.872         | 8.945e-02      | 0.94             | 7.661e-01         | 1.415             |              |                   |                  |
| <b>Profile Likelihood</b> |                 |               |               |       |               |               |                |                  |                   |                   |              |                   |                  |
| < 0.0093                  | 29              | 22            | 75.86         | ----  | ----          | ----          | ----           | 1.01             | 7.661e-01         |                   | 1.20e-02     | 1.50e-02          | 1.37e-02         |
| ≥ 0.0093                  | 68              | 60            | 88.24         | 1.901 | 1.123         | 3.217         | 1.675e-02      | 0.82             | 6.647e-01         | 1.015             |              |                   |                  |
| <b>Quantitative*</b>      | 97              | 82            | 84.54         | 1.011 | 9.865e-01     | 1.037         | 3.740e-01      |                  |                   |                   | 4.024e-01    | 3.767e-01         |                  |

\*Units of pg / mL were used in **Quantitative model only**.

**Cohort: Validation**  
**Outcome: Progression Free Survival by DLCO ( Lung Transplant counts as event )**  
**Predictor: VCAM ( ng / mL )**

|                           | Patients<br>(N) | Events<br>(n) | Events<br>(%) | HR        | HR<br>95% LCL | HR<br>95% UCL | Wald<br>pvalue | Median<br>(yrs.) | Median<br>95% LCL | Median<br>95% UCL | LR<br>pvalue | Logrank<br>pvalue | DevLIN<br>pvalue |
|---------------------------|-----------------|---------------|---------------|-----------|---------------|---------------|----------------|------------------|-------------------|-------------------|--------------|-------------------|------------------|
| <b>Quintiles</b>          |                 |               |               |           |               |               |                |                  |                   |                   |              |                   |                  |
| < 222                     | 20              | 16            | 80.00         | ----      | ----          | ----          | ----           | 0.82             | 5.285e-01         |                   | 1.25e-01     | 1.07e-01          | 1.06e-01         |
| [ 222,260)                | 20              | 18            | 90.00         | 1.906     | 9.432e-01     | 3.853         | 7.233e-02      | 0.80             | 4.349e-01         | 9.768e-01         |              |                   |                  |
| [ 260,310)                | 19              | 14            | 73.68         | 9.724e-01 | 4.666e-01     | 2.027         | 9.405e-01      | 1.02             | 7.660e-01         |                   |              |                   |                  |
| [ 310,376)                | 20              | 17            | 85.00         | 9.107e-01 | 4.534e-01     | 1.830         | 7.927e-01      | 1.51             | 7.251e-01         | 2.094             |              |                   |                  |
| ≥ 376                     | 20              | 19            | 95.00         | 1.643     | 8.244e-01     | 3.276         | 1.582e-01      | 0.68             | 5.202e-01         | 1.563             |              |                   |                  |
| <b>Quartiles</b>          |                 |               |               |           |               |               |                |                  |                   |                   |              |                   |                  |
| < 230                     | 25              | 21            | 84.00         | ----      | ----          | ----          | ----           | 0.82             | 4.513e-01         | 2.198             | 4.34e-01     | 4.36e-01          | 4.30e-01         |
| [ 230,285)                | 24              | 21            | 87.50         | 1.377     | 7.298e-01     | 2.599         | 3.232e-01      | 0.90             | 7.990e-01         | 1.117             |              |                   |                  |
| [ 285,358)                | 25              | 19            | 76.00         | 8.218e-01 | 4.363e-01     | 1.548         | 5.436e-01      | 1.18             | 6.647e-01         | 2.094             |              |                   |                  |
| ≥ 358                     | 25              | 23            | 92.00         | 1.156     | 6.336e-01     | 2.108         | 6.372e-01      | 0.77             | 5.202e-01         | 1.563             |              |                   |                  |
| <b>Tertiles</b>           |                 |               |               |           |               |               |                |                  |                   |                   |              |                   |                  |
| < 246                     | 34              | 29            | 85.29         | ----      | ----          | ----          | ----           | 0.79             | 4.513e-01         | 1.007             | 6.97e-01     | 6.98e-01          | 5.24e-01         |
| [ 246,334)                | 32              | 25            | 78.12         | 7.910e-01 | 4.595e-01     | 1.362         | 3.976e-01      | 0.99             | 8.620e-01         | 1.398             |              |                   |                  |
| ≥ 334                     | 33              | 30            | 90.91         | 9.049e-01 | 5.390e-01     | 1.519         | 7.052e-01      | 0.81             | 5.935e-01         | 1.514             |              |                   |                  |
| <b>Profile Likelihood</b> |                 |               |               |           |               |               |                |                  |                   |                   |              |                   |                  |
| <365.7                    | 78              | 64            | 82.05         | ----      | ----          | ----          | ----           | 0.90             | 7.990e-01         | 1.127             | 9.82e-02     | 8.38e-02          | 3.68e-02         |
| ≥365.7                    | 21              | 20            | 95.24         | 1.563     | 9.391e-01     | 2.600         | 8.576e-02      | 0.68             | 4.787e-01         | 1.470             |              |                   |                  |
| <b>Quantitative</b>       | 99              | 84            | 84.85         | 1.000     | 0.9984        | 1.002         | 7.682e-01      |                  |                   |                   | 7.702e-01    | 7.682e-01         |                  |

Cohort: **Validation**

Outcome: **Progression Free Survival by DLCO ( Lung Transplant counts as event )**

Predictor: **S100A12 ( ng / mL )**

|                           | Patients<br>(N) | Events<br>(n) | Events<br>(%) | HR        | HR<br>95% LCL | HR<br>95% UCL | Wald<br>pvalue | Median<br>(yrs.) | Median<br>95% LCL | Median<br>95% UCL | LR<br>pvalue | Logrank<br>pvalue | DevLIN<br>pvalue |
|---------------------------|-----------------|---------------|---------------|-----------|---------------|---------------|----------------|------------------|-------------------|-------------------|--------------|-------------------|------------------|
| <b>Quintiles</b>          |                 |               |               |           |               |               |                |                  |                   |                   |              |                   |                  |
| < 36.6                    | 20              | 16            | 80.00         | ----      | ----          | ----          | ----           | 0.86             | 6.647e-01         | 1.470             | 2.54e-01     | 2.12e-01          | 2.48e-01         |
| [ 36.6,49.2)              | 19              | 15            | 78.95         | 7.504e-01 | 3.720e-01     | 1.514         | 4.224e-01      | 0.95             | 6.265e-01         |                   |              |                   |                  |
| [ 49.2,65.9)              | 19              | 15            | 78.95         | 7.352e-01 | 3.612e-01     | 1.496         | 3.961e-01      | 0.94             | 7.661e-01         | 2.370             |              |                   |                  |
| [ 65.9,105)               | 20              | 19            | 95.00         | 6.668e-01 | 3.237e-01     | 1.373         | 2.716e-01      | 0.77             | 4.321e-01         | 1.180             |              |                   |                  |
| ≥ 105                     | 21              | 19            | 90.48         | 1.356     | 6.938e-01     | 2.650         | 3.731e-01      | 0.98             | 4.349e-01         | 1.927             |              |                   |                  |
| <b>Quartiles</b>          |                 |               |               |           |               |               |                |                  |                   |                   |              |                   |                  |
| < 39.7                    | 25              | 21            | 84.00         | ----      | ----          | ----          | ----           | 0.86             | 6.647e-01         | 1.470             | 9.30e-01     | 9.33e-01          | 9.20e-01         |
| [ 39.7,54.5)              | 24              | 19            | 79.17         | 8.371e-01 | 4.489e-01     | 1.561         | 5.761e-01      | 0.95             | 6.895e-01         |                   |              |                   |                  |
| [ 54.5,82.8)              | 24              | 20            | 83.33         | 1.013     | 5.473e-01     | 1.877         | 9.660e-01      | 0.80             | 4.759e-01         | 1.511             |              |                   |                  |
| ≥ 82.8                    | 26              | 24            | 92.31         | 9.479e-01 | 5.191e-01     | 1.731         | 8.617e-01      | 0.79             | 5.935e-01         | 1.552             |              |                   |                  |
| <b>Tertiles</b>           |                 |               |               |           |               |               |                |                  |                   |                   |              |                   |                  |
| < 43.9                    | 34              | 27            | 79.41         | ----      | ----          | ----          | ----           | 0.95             | 7.251e-01         | 1.415             | 5.39e-01     | 5.36e-01          | 1.96e-01         |
| [ 43.9,72.3)              | 31              | 25            | 80.65         | 8.777e-01 | 5.048e-01     | 1.526         | 6.438e-01      | 0.83             | 7.661e-01         | 1.913             |              |                   |                  |
| ≥ 72.3                    | 34              | 32            | 94.12         | 1.185     | 7.013e-01     | 2.002         | 5.258e-01      | 0.77             | 4.349e-01         | 1.180             |              |                   |                  |
| <b>Profile Likelihood</b> |                 |               |               |           |               |               |                |                  |                   |                   |              |                   |                  |
| < 65.7                    | 58              | 46            | 79.31         | ----      | ----          | ----          | ----           | 0.94             | 7.990e-01         | 1.322             | 2.95e-01     | 2.91e-01          | 9.61e-02         |
| ≥ 65.7                    | 41              | 38            | 92.68         | 1.266     | 8.167e-01     | 1.962         | 2.918e-01      | 0.77             | 4.513e-01         | 1.007             |              |                   |                  |
| <b>Quantitative</b>       | 99              | 84            | 84.85         | 0.9998    | 0.9957        | 1.004         | 9.229e-01      |                  |                   |                   | 9.226e-01    | 9.229e-01         |                  |

**Cohort: Validation**

**Outcome: Progression Free Survival by CPI ( Lung Transplant counts as event )**

**Predictor: Age (years)**

|                           | Patients<br>(N) | Events<br>(n) | Events<br>(%) | HR        | HR<br>95% LCL | HR<br>95% UCL | Wald<br>pvalue | Median<br>(yrs.) | Median<br>95% LCL | Median<br>95% UCL | LR<br>pvalue | Logrank<br>pvalue | DevLIN<br>pvalue |
|---------------------------|-----------------|---------------|---------------|-----------|---------------|---------------|----------------|------------------|-------------------|-------------------|--------------|-------------------|------------------|
| <b>Quintiles</b>          |                 |               |               |           |               |               |                |                  |                   |                   |              |                   |                  |
| < 61.6                    | 19              | 14            | 73.68         | ----      | ----          | ----          | ----           | 0.73             | 4.594e-01         |                   | 1.25e-01     | 8.64e-02          | 6.26e-02         |
| [ 61.6,66.5)              | 20              | 20            | 100.00        | 2.510     | 1.237         | 5.095         | 1.083e-02      | 0.49             | 3.445e-01         | 8.236e-01         |              |                   |                  |
| [ 66.5,70.1)              | 20              | 18            | 90.00         | 1.264     | 6.193e-01     | 2.581         | 5.195e-01      | 0.65             | 5.202e-01         | 2.045             |              |                   |                  |
| [ 70.1,77.1)              | 20              | 19            | 95.00         | 1.371     | 6.765e-01     | 2.777         | 3.816e-01      | 0.98             | 6.895e-01         | 1.130             |              |                   |                  |
| ≥ 77.1                    | 20              | 18            | 90.00         | 1.428     | 6.910e-01     | 2.952         | 3.360e-01      | 0.85             | 7.251e-01         | 1.552             |              |                   |                  |
| <b>Quartiles</b>          |                 |               |               |           |               |               |                |                  |                   |                   |              |                   |                  |
| < 62.8                    | 24              | 19            | 79.17         | ----      | ----          | ----          | ----           | 0.61             | 4.513e-01         | 2.299             | 3.32e-01     | 2.90e-01          | 3.32e-01         |
| [ 62.8,68.4)              | 25              | 24            | 96.00         | 1.616     | 8.702e-01     | 3.001         | 1.285e-01      | 0.55             | 3.993e-01         | 8.236e-01         |              |                   |                  |
| [ 68.4,75)                | 25              | 23            | 92.00         | 9.868e-01 | 5.300e-01     | 1.838         | 9.667e-01      | 0.98             | 6.895e-01         | 1.127             |              |                   |                  |
| ≥ 75                      | 25              | 23            | 92.00         | 1.069     | 5.732e-01     | 1.994         | 8.333e-01      | 0.90             | 7.934e-01         | 1.415             |              |                   |                  |
| <b>Tertiles</b>           |                 |               |               |           |               |               |                |                  |                   |                   |              |                   |                  |
| < 65.3                    | 33              | 28            | 84.85         | ----      | ----          | ----          | ----           | 0.59             | 4.594e-01         | 1.180             | 9.32e-01     | 9.34e-01          | 9.27e-01         |
| [ 65.3,72.8)              | 33              | 31            | 93.94         | 1.078     | 6.406e-01     | 1.815         | 7.763e-01      | 0.80             | 5.202e-01         | 1.007             |              |                   |                  |
| ≥ 72.8                    | 33              | 30            | 90.91         | 9.843e-01 | 5.831e-01     | 1.661         | 9.527e-01      | 0.85             | 7.251e-01         | 1.117             |              |                   |                  |
| <b>Profile Likelihood</b> |                 |               |               |           |               |               |                |                  |                   |                   |              |                   |                  |
| <68.0                     | 47              | 42            | 89.36         | ----      | ----          | ----          | ----           | 0.55             | 4.594e-01         | 7.661e-01         | 9.64e-02     | 9.08e-02          | 8.21e-03         |
| ≥68.0                     | 52              | 47            | 90.38         | 6.961e-01 | 4.552e-01     | 1.065         | 9.471e-02      | 0.98             | 8.235e-01         | 1.081             |              |                   |                  |
| <b>Quantitative</b>       |                 |               |               |           |               |               |                |                  |                   |                   |              |                   |                  |
|                           | 99              | 89            | 89.90         | 9.987e-01 | 9.759e-01     | 1.022         | 9.156e-01      |                  |                   |                   | 9.158e-01    | 9.156e-01         |                  |
| <b>Predictor: Gender</b>  |                 |               |               |           |               |               |                |                  |                   |                   |              |                   |                  |
| Female                    | 34              | 30            | 88.24         | ----      | ----          | ----          | ----           | 0.98             | 0.793             | 1.42              |              |                   |                  |
| Male                      | 65              | 59            | 90.77         | 1.51      | 0.965         | 2.354         | 7.17E-02       | 0.63             | 0.547             | 0.82              | 6.67E-02     | 6.88E-02          |                  |

**Cohort: Validation**

**Outcome: Progression Free Survival by CPI ( Lung Transplant counts as event )**

**Predictor: Baseline (4-month) FVC % Predicted**

|                           | Patients<br>(N) | Events<br>(n) | Events<br>(%) | HR        | HR<br>95% LCL | HR<br>95% UCL | Wald<br>pvalue | Median<br>(yrs.) | Median<br>95% LCL | Median<br>95% UCL | LR<br>pvalue | Logrank<br>pvalue | DevLIN<br>pvalue |
|---------------------------|-----------------|---------------|---------------|-----------|---------------|---------------|----------------|------------------|-------------------|-------------------|--------------|-------------------|------------------|
| <b>Quintiles</b>          |                 |               |               |           |               |               |                |                  |                   |                   |              |                   |                  |
| < 48.7                    | 18              | 16            | 88.89         | ----      | ----          | ----          | ----           | 0.63             | 3.444e-01         | 2.335             | 6.76e-01     | 6.69e-01          | 5.42e-01         |
| [ 48.7,54.9)              | 16              | 16            | 100.00        | 1.152     | 5.737e-01     | 2.315         | 6.902e-01      | 0.55             | 4.513e-01         | 2.094             |              |                   |                  |
| [ 54.9,62)                | 17              | 17            | 100.00        | 1.485     | 7.359e-01     | 2.998         | 2.695e-01      | 0.77             | 4.787e-01         | 9.386e-01         |              |                   |                  |
| [ 62,77.2)                | 17              | 16            | 94.12         | 1.218     | 6.034e-01     | 2.457         | 5.826e-01      | 0.73             | 5.307e-01         | 1.470             |              |                   |                  |
| ≥ 77.2                    | 18              | 15            | 83.33         | 8.856e-01 | 4.290e-01     | 1.828         | 7.425e-01      | 0.80             | 5.800e-01         |                   |              |                   |                  |
| <b>Quartiles</b>          |                 |               |               |           |               |               |                |                  |                   |                   |              |                   |                  |
| < 49.7                    | 21              | 19            | 90.48         | ----      | ----          | ----          | ----           | 0.79             | 4.431e-01         | 1.563             | 2.43e-01     | 2.43e-01          | 1.16e-01         |
| [ 49.7,58.2)              | 22              | 22            | 100.00        | 1.436     | 7.708e-01     | 2.677         | 2.542e-01      | 0.55             | 4.759e-01         | 9.030e-01         |              |                   |                  |
| [ 58.2,72.6)              | 22              | 21            | 95.45         | 1.488     | 7.919e-01     | 2.797         | 2.168e-01      | 0.65             | 5.285e-01         | 9.879e-01         |              |                   |                  |
| ≥ 72.6                    | 21              | 18            | 85.71         | 8.611e-01 | 4.454e-01     | 1.665         | 6.567e-01      | 0.85             | 6.238e-01         | 1.913             |              |                   |                  |
| <b>Tertiles</b>           |                 |               |               |           |               |               |                |                  |                   |                   |              |                   |                  |
| < 51.8                    | 28              | 26            | 92.86         | ----      | ----          | ----          | ----           | 0.63             | 4.431e-01         | 1.180             | 1.52e-01     | 1.36e-01          | 9.27e-02         |
| [ 51.8,67.6)              | 30              | 29            | 96.67         | 1.517     | 8.787e-01     | 2.620         | 1.347e-01      | 0.55             | 4.787e-01         | 9.030e-01         |              |                   |                  |
| ≥ 67.6                    | 28              | 25            | 89.29         | 9.062e-01 | 5.177e-01     | 1.586         | 7.302e-01      | 0.83             | 6.238e-01         | 1.081             |              |                   |                  |
| <b>Profile Likelihood</b> |                 |               |               |           |               |               |                |                  |                   |                   |              |                   |                  |
| < 71.9                    | 64              | 61            | 95.31         | ----      | ----          | ----          | ----           | 0.63             | 4.950e-01         | 8.538e-01         | 1.32e-01     | 1.41e-01          | 1.68e-02         |
| ≥ 71.9                    | 22              | 19            | 86.36         | 6.755e-01 | 3.984e-01     | 1.145         | 1.452e-01      | 0.85             | 6.238e-01         | 1.913             |              |                   |                  |
| <b>Quantitative</b>       |                 |               |               |           |               |               |                |                  |                   |                   |              |                   |                  |
|                           | 86              | 80            | 93.02         | 9.992e-01 | 9.868e-01     | 1.012         | 8.988e-01      |                  |                   |                   | 8.988e-01    | 8.988e-01         |                  |

**Cohort: Validation**

**Outcome: Progression Free Survival by CPI ( Lung Transplant counts as event )**

**Predictor: Baseline (4-month) DLco % Predicted**

|                           | Patients<br>(N) | Events<br>(n) | Events<br>(%) | HR        | HR<br>95% LCL | HR<br>95% UCL | Wald<br>pvalue | Median<br>(yrs.) | Median<br>95% LCL | Median<br>95% UCL | LR<br>pvalue | Logrank<br>pvalue | DevLIN<br>pvalue |
|---------------------------|-----------------|---------------|---------------|-----------|---------------|---------------|----------------|------------------|-------------------|-------------------|--------------|-------------------|------------------|
| <b>Quintiles</b>          |                 |               |               |           |               |               |                |                  |                   |                   |              |                   |                  |
| < 30.1                    | 17              | 17            | 100.00        | ----      | ----          | ----          | ----           | 0.43             | 3.062e-01         | 1.117             | 4.72e-01     | 4.30e-01          | 6.15e-01         |
| [ 30.1,38.8)              | 15              | 14            | 93.33         | 5.681e-01 | 2.774e-01     | 1.164         | 1.222e-01      | 0.82             | 6.515e-01         | 2.094             |              |                   |                  |
| [ 38.8,46)                | 16              | 15            | 93.75         | 7.255e-01 | 3.586e-01     | 1.468         | 3.720e-01      | 0.73             | 4.950e-01         | 1.563             |              |                   |                  |
| [ 46,62.2)                | 16              | 14            | 87.50         | 5.411e-01 | 2.646e-01     | 1.106         | 9.238e-02      | 0.85             | 6.265e-01         |                   |              |                   |                  |
| ≥ 62.2                    | 17              | 15            | 88.24         | 6.373e-01 | 3.136e-01     | 1.295         | 2.131e-01      | 0.58             | 5.307e-01         | 1.552             |              |                   |                  |
| <b>Quartiles</b>          |                 |               |               |           |               |               |                |                  |                   |                   |              |                   |                  |
| < 31.7                    | 21              | 20            | 95.24         | ----      | ----          | ----          | ----           | 0.59             | 3.068e-01         | 1.127             | 5.82e-01     | 5.79e-01          | 5.36e-01         |
| [ 31.7,43.7)              | 19              | 19            | 100.00        | 1.094     | 5.806e-01     | 2.062         | 7.807e-01      | 0.65             | 4.513e-01         | 1.185             |              |                   |                  |
| [ 43.7,56.5)              | 20              | 17            | 85.00         | 7.105e-01 | 3.705e-01     | 1.363         | 3.037e-01      | 0.85             | 6.265e-01         | 2.198             |              |                   |                  |
| ≥ 56.5                    | 21              | 19            | 90.48         | 8.546e-01 | 4.503e-01     | 1.622         | 6.309e-01      | 0.82             | 5.471e-01         | 1.130             |              |                   |                  |
| <b>Tertiles</b>           |                 |               |               |           |               |               |                |                  |                   |                   |              |                   |                  |
| < 34.6                    | 27              | 26            | 96.30         | ----      | ----          | ----          | ----           | 0.65             | 3.226e-01         | 1.007             | 6.64e-01     | 6.53e-01          | 7.93e-01         |
| [ 34.6,47.8)              | 27              | 26            | 96.30         | 8.083e-01 | 4.677e-01     | 1.397         | 4.458e-01      | 0.82             | 6.046e-01         | 1.185             |              |                   |                  |
| ≥ 47.8                    | 27              | 23            | 85.19         | 7.906e-01 | 4.468e-01     | 1.399         | 4.197e-01      | 0.69             | 5.608e-01         | 1.081             |              |                   |                  |
| <b>Profile Likelihood</b> |                 |               |               |           |               |               |                |                  |                   |                   |              |                   |                  |
| < 30.4                    | 18              | 18            | 100.00        | ----      | ----          | ----          | ----           | 0.45             | 3.062e-01         | 1.117             | 8.41e-02     | 6.79e-02          | 1.72e-01         |
| ≥ 30.4                    | 63              | 57            | 90.48         | 6.097e-01 | 3.561e-01     | 1.044         | 7.123e-02      | 0.82             | 6.238e-01         | 9.768e-01         |              |                   |                  |
| <b>Quantitative</b>       | 81              | 75            | 92.59         | 9.933e-01 | 9.809e-01     | 1.006         | 2.976e-01      |                  |                   |                   | 2.894e-01    | 2.969e-01         |                  |

**Cohort: Validation**  
**Outcome: Progression Free Survival by CPI ( Lung Transplant counts as event )**  
**Predictor: Baseline (4-month) CPI**

|                           | Patients<br>(N) | Events<br>(n) | Events<br>(%) | HR    | HR<br>95% LCL | HR<br>95% UCL | Wald<br>pvalue | Median<br>(yrs.) | Median<br>95% LCL | Median<br>95% UCL | LR<br>pvalue | Logrank<br>pvalue | DevLIN<br>pvalue |
|---------------------------|-----------------|---------------|---------------|-------|---------------|---------------|----------------|------------------|-------------------|-------------------|--------------|-------------------|------------------|
| <b>Quintiles</b>          |                 |               |               |       |               |               |                |                  |                   |                   |              |                   |                  |
| < 41.2                    | 17              | 14            | 82.35         | ----  | ----          | ----          | ----           | 0.90             | 5.553e-01         |                   | 6.47e-01     | 6.32e-01          | 7.12e-01         |
| [ 41.2,50.9)              | 15              | 14            | 93.33         | 1.233 | 5.752e-01     | 2.641         | 5.908e-01      | 0.84             | 6.265e-01         | 1.913             |              |                   |                  |
| [ 50.9,59.1)              | 17              | 17            | 100.00        | 1.746 | 8.401e-01     | 3.628         | 1.354e-01      | 0.69             | 4.950e-01         | 9.768e-01         |              |                   |                  |
| [ 59.1,65.3)              | 16              | 15            | 93.75         | 1.162 | 5.492e-01     | 2.457         | 6.950e-01      | 0.77             | 4.431e-01         | 2.094             |              |                   |                  |
| ≥ 65.3                    | 16              | 15            | 93.75         | 1.340 | 6.353e-01     | 2.826         | 4.421e-01      | 0.45             | 3.062e-01         | 1.180             |              |                   |                  |
| <b>Quartiles</b>          |                 |               |               |       |               |               |                |                  |                   |                   |              |                   |                  |
| < 44.4                    | 21              | 18            | 85.71         | ----  | ----          | ----          | ----           | 0.85             | 5.471e-01         | 1.130             | 9.26e-01     | 9.26e-01          | 6.98e-01         |
| [ 44.4,55.5)              | 19              | 18            | 94.74         | 1.128 | 5.780e-01     | 2.201         | 7.243e-01      | 0.82             | 6.238e-01         | 1.552             |              |                   |                  |
| [ 55.5,64.1)              | 21              | 20            | 95.24         | 1.251 | 6.524e-01     | 2.400         | 4.999e-01      | 0.73             | 4.950e-01         | 9.768e-01         |              |                   |                  |
| ≥ 64.1                    | 20              | 19            | 95.00         | 1.156 | 5.980e-01     | 2.235         | 6.665e-01      | 0.47             | 3.068e-01         | 1.180             |              |                   |                  |
| <b>Tertiles</b>           |                 |               |               |       |               |               |                |                  |                   |                   |              |                   |                  |
| < 49.9                    | 27              | 23            | 85.19         | ----  | ----          | ----          | ----           | 0.82             | 5.608e-01         | 1.130             | 6.29e-01     | 6.35e-01          | 9.70e-01         |
| [ 49.9,60.6)              | 27              | 26            | 96.30         | 1.232 | 6.957e-01     | 2.180         | 4.748e-01      | 0.73             | 6.127e-01         | 9.768e-01         |              |                   |                  |
| ≥ 60.6                    | 27              | 26            | 96.30         | 1.304 | 7.373e-01     | 2.306         | 3.617e-01      | 0.59             | 3.444e-01         | 1.117             |              |                   |                  |
| <b>Profile Likelihood</b> |                 |               |               |       |               |               |                |                  |                   |                   |              |                   |                  |
| <50.1                     | 28              | 24            | 85.71         | ----  | ----          | ----          | ----           | 0.85             | 5.800e-01         | 1.470             | 2.36e-01     | 2.43e-01          | 4.97e-01         |
| ≥50.1                     | 53              | 51            | 96.23         | 1.342 | 8.185e-01     | 2.199         | 2.438e-01      | 0.69             | 5.285e-01         | 9.358e-01         |              |                   |                  |
| <b>Quantitative</b>       |                 |               |               |       |               |               |                |                  |                   |                   |              |                   |                  |
|                           | 81              | 75            | 92.59         | 1.008 | 9.915e-01     | 1.025         | 3.383e-01      |                  |                   |                   | 3.317e-01    | 3.377e-01         |                  |



**Cohort: Validation**

**Outcome: Progression Free Survival by CPI ( Lung Transplant counts as event )**

**Predictor: Baseline (3-month) FVC % Predicted**

|                           | Patients<br>(N) | Events<br>(n) | Events<br>(%) | HR        | HR<br>95% LCL | HR<br>95% UCL | Wald<br>pvalue | Median<br>(yrs.) | Median<br>95% LCL | Median<br>95% UCL | LR<br>pvalue | Logrank<br>pvalue | DevLIN<br>pvalue |
|---------------------------|-----------------|---------------|---------------|-----------|---------------|---------------|----------------|------------------|-------------------|-------------------|--------------|-------------------|------------------|
| <b>Quintiles</b>          |                 |               |               |           |               |               |                |                  |                   |                   |              |                   |                  |
| < 48.9                    | 15              | 13            | 86.67         | ----      | ----          | ----          | ----           | 0.63             | 3.444e-01         |                   | 9.49e-01     | 9.45e-01          | 7.12e-01         |
| [ 48.9,55.7)              | 14              | 14            | 100.00        | 1.106     | 5.169e-01     | 2.368         | 7.945e-01      | 0.55             | 4.594e-01         | 2.094             |              |                   |                  |
| [ 55.7,62)                | 13              | 13            | 100.00        | 1.306     | 5.968e-01     | 2.857         | 5.042e-01      | 0.82             | 4.349e-01         |                   |              |                   |                  |
| [ 62,76.7)                | 16              | 15            | 93.75         | 1.019     | 4.825e-01     | 2.151         | 9.610e-01      | 0.73             | 5.307e-01         | 1.470             |              |                   |                  |
| ≥ 76.7                    | 15              | 14            | 93.33         | 9.663e-01 | 4.454e-01     | 2.096         | 9.308e-01      | 0.73             | 5.608e-01         | 2.198             |              |                   |                  |
| <b>Quartiles</b>          |                 |               |               |           |               |               |                |                  |                   |                   |              |                   |                  |
| < 49.7                    | 18              | 16            | 88.89         | ----      | ----          | ----          | ----           | 0.63             | 4.431e-01         | 2.094             | 4.66e-01     | 4.58e-01          | 2.22e-01         |
| [ 49.7,58.8)              | 18              | 18            | 100.00        | 1.507     | 7.594e-01     | 2.990         | 2.409e-01      | 0.58             | 4.594e-01         | 9.358e-01         |              |                   |                  |
| [ 58.8,73.3)              | 19              | 18            | 94.74         | 1.332     | 6.755e-01     | 2.625         | 4.082e-01      | 0.65             | 3.993e-01         | 1.130             |              |                   |                  |
| ≥ 73.3                    | 18              | 17            | 94.44         | 9.377e-01 | 4.675e-01     | 1.881         | 8.564e-01      | 0.80             | 5.800e-01         | 1.470             |              |                   |                  |
| <b>Tertiles</b>           |                 |               |               |           |               |               |                |                  |                   |                   |              |                   |                  |
| < 51.8                    | 24              | 22            | 91.67         | ----      | ----          | ----          | ----           | 0.63             | 4.431e-01         | 1.180             | 1.50e-01     | 1.30e-01          | 7.95e-02         |
| [ 51.8,68.1)              | 25              | 24            | 96.00         | 1.640     | 8.951e-01     | 3.004         | 1.093e-01      | 0.53             | 4.710e-01         | 9.358e-01         |              |                   |                  |
| ≥ 68.1                    | 24              | 23            | 95.83         | 9.412e-01 | 5.197e-01     | 1.705         | 8.416e-01      | 0.80             | 6.046e-01         | 1.081             |              |                   |                  |
| <b>Profile Likelihood</b> |                 |               |               |           |               |               |                |                  |                   |                   |              |                   |                  |
| < 68.3                    | 49              | 46            | 93.88         | ----      | ----          | ----          | ----           | 0.63             | 4.759e-01         | 8.538e-01         | 2.69e-01     | 2.70e-01          | 2.85e-02         |
| ≥ 68.3                    | 24              | 23            | 95.83         | 7.534e-01 | 4.526e-01     | 1.254         | 2.760e-01      | 0.80             | 6.046e-01         | 1.081             |              |                   |                  |
| <b>Quantitative</b>       |                 |               |               |           |               |               |                |                  |                   |                   |              |                   |                  |
|                           | 73              | 69            | 94.52         | 1.001     | 9.875e-01     | 1.014         | 9.014e-01      |                  |                   |                   | 9.014e-01    | 9.014e-01         |                  |

**Cohort: Validation**  
**Outcome: Progression Free Survival by CPI ( Lung Transplant counts as event )**  
**Predictor: Baseline (3-month) DLco % Predicted**

|                           | Patients<br>(N) | Events<br>(n) | Events<br>(%) | HR        | HR<br>95% LCL | HR<br>95% UCL | Wald<br>pvalue | Median<br>(yrs.) | Median<br>95% LCL | Median<br>95% UCL | LR<br>pvalue | Logrank<br>pvalue | DevLIN<br>pvalue |
|---------------------------|-----------------|---------------|---------------|-----------|---------------|---------------|----------------|------------------|-------------------|-------------------|--------------|-------------------|------------------|
| <b>Quintiles</b>          |                 |               |               |           |               |               |                |                  |                   |                   |              |                   |                  |
| < 28.6                    | 14              | 14            | 100.00        | ----      | ----          | ----          | ----           | 0.37             | 2.843e-01         | 1.180             | 8.13e-01     | 7.89e-01          | 9.31e-01         |
| [ 28.6,38.3)              | 13              | 12            | 92.31         | 7.263e-01 | 3.321e-01     | 1.588         | 4.231e-01      | 0.73             | 4.431e-01         |                   |              |                   |                  |
| [ 38.3,46)                | 13              | 12            | 92.31         | 6.864e-01 | 3.137e-01     | 1.502         | 3.462e-01      | 0.94             | 5.285e-01         |                   |              |                   |                  |
| [ 46,61.3)                | 14              | 13            | 92.86         | 6.319e-01 | 2.937e-01     | 1.360         | 2.404e-01      | 0.85             | 6.265e-01         |                   |              |                   |                  |
| ≥ 61.3                    | 14              | 13            | 92.86         | 6.899e-01 | 3.181e-01     | 1.496         | 3.472e-01      | 0.56             | 5.307e-01         |                   |              |                   |                  |
| <b>Quartiles</b>          |                 |               |               |           |               |               |                |                  |                   |                   |              |                   |                  |
| < 30.9                    | 18              | 17            | 94.44         | ----      | ----          | ----          | ----           | 0.53             | 3.062e-01         | 1.127             | 9.00e-01     | 8.96e-01          | 8.60e-01         |
| [ 30.9,43.8)              | 16              | 16            | 100.00        | 9.397e-01 | 4.716e-01     | 1.873         | 8.597e-01      | 0.74             | 3.637e-01         | 1.913             |              |                   |                  |
| [ 43.8,55.1)              | 16              | 14            | 87.50         | 7.836e-01 | 3.837e-01     | 1.600         | 5.032e-01      | 0.85             | 6.238e-01         | 2.198             |              |                   |                  |
| ≥ 55.1                    | 18              | 17            | 94.44         | 8.270e-01 | 4.165e-01     | 1.642         | 5.873e-01      | 0.63             | 5.553e-01         | 1.130             |              |                   |                  |
| <b>Tertiles</b>           |                 |               |               |           |               |               |                |                  |                   |                   |              |                   |                  |
| < 33.8                    | 22              | 21            | 95.45         | ----      | ----          | ----          | ----           | 0.59             | 3.068e-01         | 1.117             | 8.97e-01     | 8.92e-01          | 4.78e-01         |
| [ 33.8,47.4)              | 24              | 23            | 95.83         | 8.732e-01 | 4.815e-01     | 1.584         | 6.553e-01      | 0.82             | 5.285e-01         | 1.185             |              |                   |                  |
| ≥ 47.4                    | 22              | 20            | 90.91         | 8.951e-01 | 4.790e-01     | 1.673         | 7.283e-01      | 0.69             | 5.608e-01         | 1.081             |              |                   |                  |
| <b>Profile Likelihood</b> |                 |               |               |           |               |               |                |                  |                   |                   |              |                   |                  |
| < 41.6                    | 31              | 30            | 96.77         | ----      | ----          | ----          | ----           | 0.53             | 3.445e-01         | 9.879e-01         | 1.33e-01     | 1.26e-01          | 2.03e-01         |
| ≥ 41.6                    | 37              | 34            | 91.89         | 6.820e-01 | 4.153e-01     | 1.120         | 1.305e-01      | 0.85             | 6.238e-01         | 1.015             |              |                   |                  |
| <b>Quantitative</b>       |                 |               |               |           |               |               |                |                  |                   |                   |              |                   |                  |
|                           | 68              | 64            | 94.12         | 9.940e-01 | 9.808e-01     | 1.007         | 3.802e-01      |                  |                   |                   | 3.733e-01    | 3.796e-01         |                  |

**Cohort: Validation**

**Outcome: Progression Free Survival by CPI ( Lung Transplant counts as event )**

**Predictor: Baseline (3-month) CPI**

|                           | Patients<br>(N) | Events<br>(n) | Events<br>(%) | HR        | HR<br>95% LCL | HR<br>95% UCL | Wald<br>pvalue | Median<br>(yrs.) | Median<br>95% LCL | Median<br>95% UCL | LR<br>pvalue | Logrank<br>pvalue | DevLIN<br>pvalue |
|---------------------------|-----------------|---------------|---------------|-----------|---------------|---------------|----------------|------------------|-------------------|-------------------|--------------|-------------------|------------------|
| <b>Quintiles</b>          |                 |               |               |           |               |               |                |                  |                   |                   |              |                   |                  |
| < 42.9                    | 14              | 13            | 92.86         | ----      | ----          | ----          | ----           | 0.56             | 5.307e-01         |                   | 8.14e-01     | 7.84e-01          | 6.80e-01         |
| [ 42.9,51.7)              | 13              | 12            | 92.31         | 9.605e-01 | 4.264e-01     | 2.164         | 9.225e-01      | 0.85             | 6.265e-01         |                   |              |                   |                  |
| [ 51.7,59.8)              | 14              | 13            | 92.86         | 9.899e-01 | 4.483e-01     | 2.186         | 9.799e-01      | 0.73             | 6.127e-01         |                   |              |                   |                  |
| [ 59.8,66)                | 14              | 14            | 100.00        | 1.464     | 6.692e-01     | 3.203         | 3.399e-01      | 0.62             | 3.637e-01         | 1.563             |              |                   |                  |
| ≥ 66                      | 13              | 12            | 92.31         | 9.891e-01 | 4.422e-01     | 2.212         | 9.786e-01      | 0.47             | 2.843e-01         |                   |              |                   |                  |
| <b>Quartiles</b>          |                 |               |               |           |               |               |                |                  |                   |                   |              |                   |                  |
| < 45.4                    | 18              | 17            | 94.44         | ----      | ----          | ----          | ----           | 0.62             | 5.553e-01         | 1.130             | 9.63e-01     | 9.63e-01          | 9.88e-01         |
| [ 45.4,56)                | 16              | 15            | 93.75         | 1.104     | 5.430e-01     | 2.245         | 7.844e-01      | 0.82             | 6.127e-01         | 1.552             |              |                   |                  |
| [ 56,64.8)                | 17              | 16            | 94.12         | 1.136     | 5.658e-01     | 2.282         | 7.195e-01      | 0.73             | 5.285e-01         | 1.563             |              |                   |                  |
| ≥ 64.8                    | 17              | 16            | 94.12         | 1.200     | 5.983e-01     | 2.406         | 6.077e-01      | 0.47             | 3.062e-01         | 1.127             |              |                   |                  |
| <b>Tertiles</b>           |                 |               |               |           |               |               |                |                  |                   |                   |              |                   |                  |
| < 50.3                    | 22              | 20            | 90.91         | ----      | ----          | ----          | ----           | 0.85             | 5.608e-01         | 1.470             | 5.98e-01     | 6.10e-01          | 7.38e-01         |
| [ 50.3,62.2)              | 24              | 23            | 95.83         | 1.315     | 7.128e-01     | 2.426         | 3.810e-01      | 0.69             | 6.046e-01         | 9.768e-01         |              |                   |                  |
| ≥ 62.2                    | 22              | 21            | 95.45         | 1.317     | 7.069e-01     | 2.455         | 3.855e-01      | 0.47             | 3.068e-01         | 1.117             |              |                   |                  |
| <b>Profile Likelihood</b> |                 |               |               |           |               |               |                |                  |                   |                   |              |                   |                  |
| <50.1                     | 22              | 20            | 90.91         | ----      | ----          | ----          | ----           | 0.85             | 5.608e-01         | 1.470             | 3.11e-01     | 3.20e-01          | 4.47e-01         |
| ≥50.1                     | 46              | 44            | 95.65         | 1.316     | 7.670e-01     | 2.258         | 3.188e-01      | 0.65             | 5.285e-01         | 9.768e-01         |              |                   |                  |
| <b>Quantitative</b>       |                 |               |               |           |               |               |                |                  |                   |                   |              |                   |                  |
|                           | 68              | 64            | 94.12         | 1.006     | 9.886e-01     | 1.024         | 4.868e-01      |                  |                   |                   | 4.821e-01    | 4.865e-01         |                  |

**Cohort: Validation**  
**Outcome: Progression Free Survival by CPI ( Lung Transplant counts as event )**  
**Predictor: MMP7Elisa ( ng / mL )**

|                           | Patients<br>(N) | Events<br>(n) | Events<br>(%) | HR        | HR<br>95% LCL | HR<br>95% UCL | Wald<br>pvalue | Median<br>(yrs.) | Median<br>95% LCL | Median<br>95% UCL | LR<br>pvalue | Logrank<br>pvalue | DevLIN<br>pvalue |
|---------------------------|-----------------|---------------|---------------|-----------|---------------|---------------|----------------|------------------|-------------------|-------------------|--------------|-------------------|------------------|
| <b>Quintiles</b>          |                 |               |               |           |               |               |                |                  |                   |                   |              |                   |                  |
| < 3.41                    | 19              | 17            | 89.47         | ----      | ----          | ----          | ----           | 0.63             | 5.307e-01         | 9.386e-01         | 4.62e-01     | 4.96e-01          | 4.96e-01         |
| [ 3.41,4.56)              | 19              | 15            | 78.95         | 5.408e-01 | 2.647e-01     | 1.105         | 9.173e-02      | 1.00             | 6.895e-01         |                   |              |                   |                  |
| [ 4.56,5.49)              | 20              | 19            | 95.00         | 8.274e-01 | 4.208e-01     | 1.627         | 5.827e-01      | 0.90             | 4.594e-01         | 2.045             |              |                   |                  |
| [ 5.49,7.52)              | 20              | 18            | 90.00         | 8.769e-01 | 4.437e-01     | 1.733         | 7.055e-01      | 0.61             | 4.759e-01         | 1.185             |              |                   |                  |
| ≥ 7.52                    | 21              | 20            | 95.24         | 8.680e-01 | 4.467e-01     | 1.687         | 6.763e-01      | 0.65             | 4.513e-01         | 1.415             |              |                   |                  |
| <b>Quartiles</b>          |                 |               |               |           |               |               |                |                  |                   |                   |              |                   |                  |
| < 3.54                    | 24              | 20            | 83.33         | ----      | ----          | ----          | ----           | 0.82             | 6.046e-01         | 1.130             | 7.77e-01     | 7.76e-01          | 8.05e-01         |
| [ 3.54,4.94)              | 24              | 21            | 87.50         | 1.251     | 6.685e-01     | 2.343         | 4.832e-01      | 0.77             | 5.935e-01         | 1.117             |              |                   |                  |
| [ 4.94,6.46)              | 25              | 23            | 92.00         | 1.159     | 6.273e-01     | 2.140         | 6.379e-01      | 0.61             | 4.759e-01         | 1.470             |              |                   |                  |
| ≥ 6.46                    | 26              | 25            | 96.15         | 1.362     | 7.483e-01     | 2.478         | 3.123e-01      | 0.69             | 4.710e-01         | 1.185             |              |                   |                  |
| <b>Tertiles</b>           |                 |               |               |           |               |               |                |                  |                   |                   |              |                   |                  |
| < 3.99                    | 33              | 27            | 81.82         | ----      | ----          | ----          | ----           | 0.82             | 6.265e-01         | 1.015             | 4.89e-01     | 4.96e-01          | 5.40e-01         |
| [ 3.99,5.91)              | 32              | 31            | 96.88         | 1.325     | 7.838e-01     | 2.240         | 2.935e-01      | 0.68             | 5.202e-01         | 1.015             |              |                   |                  |
| ≥ 5.91                    | 34              | 31            | 91.18         | 1.311     | 7.771e-01     | 2.211         | 3.103e-01      | 0.69             | 4.710e-01         | 1.180             |              |                   |                  |
| <b>Profile Likelihood</b> |                 |               |               |           |               |               |                |                  |                   |                   |              |                   |                  |
| < 4.0                     | 33              | 27            | 81.82         | ----      | ----          | ----          | ----           | 0.82             | 6.265e-01         | 1.015             | 2.32e-01     | 2.36e-01          | 2.70e-01         |
| ≥ 4.0                     | 66              | 62            | 93.94         | 1.318     | 8.318e-01     | 2.088         | 2.398e-01      | 0.68             | 5.202e-01         | 9.768e-01         |              |                   |                  |
| <b>Quantitative</b>       |                 |               |               |           |               |               |                |                  |                   |                   |              |                   |                  |
|                           | 99              | 89            | 89.90         | 1.016     | 9.563e-01     | 1.080         | 6.060e-01      |                  |                   |                   | 6.124e-01    | 6.059e-01         |                  |

**Cohort: Validation**  
**Outcome: Progression Free Survival by CPI ( Lung Transplant counts as event )**  
**Predictor: ICAM ( ng / mL )**

|                           | Patients<br>(N) | Events<br>(n) | Events<br>(%) | HR    | HR<br>95% LCL | HR<br>95% UCL | Wald<br>pvalue | Median<br>(yrs.) | Median<br>95% LCL | Median<br>95% UCL | LR<br>pvalue | Logrank<br>pvalue | DevLIN<br>pvalue |
|---------------------------|-----------------|---------------|---------------|-------|---------------|---------------|----------------|------------------|-------------------|-------------------|--------------|-------------------|------------------|
| <b>Quintiles</b>          |                 |               |               |       |               |               |                |                  |                   |                   |              |                   |                  |
| < 226                     | 20              | 16            | 80.00         | ----  | ----          | ----          | ----           | 0.82             | 5.608e-01         | 1.081             | 1.03e-01     | 7.25e-02          | 6.36e-02         |
| [ 226,281)                | 20              | 18            | 90.00         | 1.027 | 5.132e-01     | 2.055         | 9.399e-01      | 0.94             | 8.236e-01         | 2.198             |              |                   |                  |
| [ 281,326)                | 18              | 16            | 88.89         | 1.576 | 7.704e-01     | 3.222         | 2.130e-01      | 0.60             | 4.513e-01         | 9.386e-01         |              |                   |                  |
| [ 326,419)                | 20              | 19            | 95.00         | 2.256 | 1.127         | 4.514         | 2.156e-02      | 0.52             | 4.431e-01         | 9.879e-01         |              |                   |                  |
| ≥ 419                     | 21              | 20            | 95.24         | 1.115 | 5.666e-01     | 2.195         | 7.521e-01      | 0.77             | 5.285e-01         | 2.094             |              |                   |                  |
| <b>Quartiles</b>          |                 |               |               |       |               |               |                |                  |                   |                   |              |                   |                  |
| < 238                     | 25              | 20            | 80.00         | ----  | ----          | ----          | ----           | 0.83             | 6.895e-01         | 1.081             | 3.17e-01     | 2.89e-01          | 2.22e-01         |
| [ 238,303)                | 24              | 22            | 91.67         | 1.224 | 6.596e-01     | 2.273         | 5.211e-01      | 0.90             | 6.265e-01         | 1.130             |              |                   |                  |
| [ 303,387)                | 24              | 22            | 91.67         | 1.801 | 9.671e-01     | 3.353         | 6.368e-02      | 0.55             | 4.431e-01         | 8.538e-01         |              |                   |                  |
| ≥ 387                     | 26              | 25            | 96.15         | 1.247 | 6.840e-01     | 2.275         | 4.708e-01      | 0.72             | 4.759e-01         | 1.470             |              |                   |                  |
| <b>Tertiles</b>           |                 |               |               |       |               |               |                |                  |                   |                   |              |                   |                  |
| < 258                     | 34              | 28            | 82.35         | ----  | ----          | ----          | ----           | 0.98             | 7.990e-01         | 1.130             | 7.70e-02     | 7.78e-02          | 3.07e-02         |
| [ 258,367)                | 31              | 28            | 90.32         | 1.823 | 1.065         | 3.121         | 2.854e-02      | 0.63             | 5.471e-01         | 9.030e-01         |              |                   |                  |
| ≥ 367                     | 34              | 33            | 97.06         | 1.486 | 8.917e-01     | 2.477         | 1.285e-01      | 0.64             | 5.202e-01         | 1.015             |              |                   |                  |
| <b>Profile Likelihood</b> |                 |               |               |       |               |               |                |                  |                   |                   |              |                   |                  |
| <258.3                    | 34              | 28            | 82.35         | ----  | ----          | ----          | ----           | 0.98             | 7.990e-01         | 1.130             | 3.36e-02     | 3.63e-02          | 1.14e-02         |
| ≥258.3                    | 65              | 61            | 93.85         | 1.620 | 1.026         | 2.559         | 3.858e-02      | 0.63             | 5.471e-01         | 8.538e-01         |              |                   |                  |
| <b>Quantitative</b>       |                 |               |               |       |               |               |                |                  |                   |                   |              |                   |                  |
|                           | 99              | 89            | 89.90         | 1.001 | 0.9988        | 1.002         | 5.381e-01      |                  |                   |                   | 5.401e-01    | 5.380e-01         |                  |

Cohort: **Validation**

Outcome: **Progression Free Survival by CPI ( Lung Transplant counts as event )**

Predictor: **IL8 ( ng / mL )**

|                           | Patients<br>(N) | Events<br>(n) | Events<br>(%) | HR        | HR<br>95% LCL | HR<br>95% UCL | Wald<br>pvalue | Median<br>(yrs.) | Median<br>95% LCL | Median<br>95% UCL | LR<br>pvalue | Logrank<br>pvalue | DevLIN<br>pvalue |
|---------------------------|-----------------|---------------|---------------|-----------|---------------|---------------|----------------|------------------|-------------------|-------------------|--------------|-------------------|------------------|
| <b>Quintiles</b>          |                 |               |               |           |               |               |                |                  |                   |                   |              |                   |                  |
| < 0.00767                 | 19              | 17            | 89.47         | ----      | ----          | ----          | ----           | 0.94             | 4.594e-01         | 2.198             | 2.35e-01     | 2.11e-01          | 2.48e-01         |
| [ 0.00767,0.0101)         | 20              | 17            | 85.00         | 1.911     | 9.304e-01     | 3.927         | 7.780e-02      | 0.73             | 6.046e-01         | 2.370             |              |                   |                  |
| [ 0.0101,0.0131)          | 18              | 16            | 88.89         | 1.604     | 8.124e-01     | 3.165         | 1.735e-01      | 0.55             | 4.513e-01         | 1.081             |              |                   |                  |
| [ 0.0131,0.0178)          | 20              | 19            | 95.00         | 1.193     | 6.018e-01     | 2.365         | 6.134e-01      | 0.80             | 4.710e-01         | 1.130             |              |                   |                  |
| ≥ 0.0178                  | 20              | 18            | 90.00         | 9.436e-01 | 4.751e-01     | 1.874         | 8.683e-01      | 0.94             | 6.238e-01         | 1.470             |              |                   |                  |
| <b>Quartiles</b>          |                 |               |               |           |               |               |                |                  |                   |                   |              |                   |                  |
| < 0.00825                 | 24              | 22            | 91.67         | ----      | ----          | ----          | ----           | 0.77             | 5.307e-01         | 1.322             | 3.15e-02     | 1.58e-02          | 3.39e-02         |
| [ 0.00825,0.0112)         | 24              | 19            | 79.17         | 2.307     | 1.251         | 4.253         | 7.393e-03      | 0.73             | 5.471e-01         | 2.045             |              |                   |                  |
| [ 0.0112,0.0164)          | 24              | 24            | 100.00        | 1.120     | 6.063e-01     | 2.067         | 7.182e-01      | 0.50             | 4.513e-01         | 7.995e-01         |              |                   |                  |
| ≥ 0.0164                  | 25              | 22            | 88.00         | 1.076     | 5.707e-01     | 2.028         | 8.212e-01      | 0.98             | 7.661e-01         | 1.470             |              |                   |                  |
| <b>Tertiles</b>           |                 |               |               |           |               |               |                |                  |                   |                   |              |                   |                  |
| < 0.00959                 | 32              | 27            | 84.38         | ----      | ----          | ----          | ----           | 0.82             | 6.046e-01         | 1.322             | 1.51e-01     | 1.56e-01          | 1.18e-01         |
| [ 0.00959,0.015)          | 32              | 30            | 93.75         | 1.462     | 8.534e-01     | 2.504         | 1.668e-01      | 0.61             | 5.285e-01         | 8.538e-01         |              |                   |                  |
| ≥ 0.015                   | 33              | 30            | 90.91         | 1.666     | 9.720e-01     | 2.854         | 6.336e-02      | 0.82             | 6.238e-01         | 1.117             |              |                   |                  |
| <b>Profile Likelihood</b> |                 |               |               |           |               |               |                |                  |                   |                   |              |                   |                  |
| < 0.0093                  | 29              | 24            | 82.76         | ----      | ----          | ----          | ----           | 0.98             | 6.046e-01         | 2.198             | 2.28e-02     | 2.61e-02          | 1.12e-02         |
| ≥ 0.0093                  | 68              | 63            | 92.65         | 1.740     | 1.060         | 2.856         | 2.842e-02      | 0.73             | 5.800e-01         | 8.538e-01         |              |                   |                  |
| <b>Quantitative*</b>      | 97              | 87            | 89.69         | 1.006     | 9.799e-01     | 1.032         | 6.684e-01      |                  |                   |                   | 6.762e-01    | 6.689e-01         |                  |

\*Units of pg / mL were used in **Quantitative model only**.

**Cohort: Validation**  
**Outcome: Progression Free Survival by CPI ( Lung Transplant counts as event )**  
**Predictor: VCAM ( ng / mL )**

|                           | Patients<br>(N) | Events<br>(n) | Events<br>(%) | HR        | HR<br>95% LCL | HR<br>95% UCL | Wald<br>pvalue | Median<br>(yrs.) | Median<br>95% LCL | Median<br>95% UCL | LR<br>pvalue | Logrank<br>pvalue | DevLIN<br>pvalue |
|---------------------------|-----------------|---------------|---------------|-----------|---------------|---------------|----------------|------------------|-------------------|-------------------|--------------|-------------------|------------------|
| <b>Quintiles</b>          |                 |               |               |           |               |               |                |                  |                   |                   |              |                   |                  |
| < 222                     | 20              | 16            | 80.00         | ----      | ----          | ----          | ----           | 0.82             | 5.285e-01         |                   | 1.40e-01     | 1.23e-01          | 1.96e-01         |
| [ 222,260)                | 20              | 19            | 95.00         | 2.269     | 1.134         | 4.542         | 2.061e-02      | 0.56             | 4.349e-01         | 9.358e-01         |              |                   |                  |
| [ 260,310)                | 19              | 17            | 89.47         | 1.239     | 6.171e-01     | 2.489         | 5.464e-01      | 0.98             | 5.608e-01         | 1.117             |              |                   |                  |
| [ 310,376)                | 20              | 18            | 90.00         | 1.248     | 6.270e-01     | 2.485         | 5.280e-01      | 0.73             | 6.238e-01         | 2.045             |              |                   |                  |
| ≥ 376                     | 20              | 19            | 95.00         | 1.794     | 9.032e-01     | 3.565         | 9.505e-02      | 0.59             | 4.787e-01         | 1.470             |              |                   |                  |
| <b>Quartiles</b>          |                 |               |               |           |               |               |                |                  |                   |                   |              |                   |                  |
| < 230                     | 25              | 21            | 84.00         | ----      | ----          | ----          | ----           | 0.80             | 4.513e-01         | 2.198             | 6.66e-01     | 6.77e-01          | 6.05e-01         |
| [ 230,285)                | 24              | 22            | 91.67         | 1.476     | 7.904e-01     | 2.757         | 2.217e-01      | 0.85             | 5.553e-01         | 1.015             |              |                   |                  |
| [ 285,358)                | 25              | 23            | 92.00         | 1.206     | 6.613e-01     | 2.200         | 5.408e-01      | 0.69             | 6.046e-01         | 1.180             |              |                   |                  |
| ≥ 358                     | 25              | 23            | 92.00         | 1.280     | 7.019e-01     | 2.335         | 4.204e-01      | 0.68             | 4.787e-01         | 1.470             |              |                   |                  |
| <b>Tertiles</b>           |                 |               |               |           |               |               |                |                  |                   |                   |              |                   |                  |
| < 246                     | 34              | 30            | 88.24         | ----      | ----          | ----          | ----           | 0.65             | 4.513e-01         | 8.538e-01         | 8.10e-01     | 8.08e-01          | 4.27e-01         |
| [ 246,334)                | 32              | 28            | 87.50         | 8.808e-01 | 5.225e-01     | 1.485         | 6.339e-01      | 0.94             | 6.895e-01         | 1.081             |              |                   |                  |
| ≥ 334                     | 33              | 31            | 93.94         | 1.036     | 6.232e-01     | 1.722         | 8.914e-01      | 0.68             | 5.202e-01         | 1.180             |              |                   |                  |
| <b>Profile Likelihood</b> |                 |               |               |           |               |               |                |                  |                   |                   |              |                   |                  |
| <222.6                    | 21              | 17            | 80.95         | ----      | ----          | ----          | ----           | 0.82             | 4.513e-01         |                   | 1.77e-01     | 1.93e-01          | 3.54e-01         |
| ≥222.6                    | 78              | 72            | 92.31         | 1.437     | 8.324e-01     | 2.481         | 1.931e-01      | 0.73             | 6.046e-01         | 9.386e-01         |              |                   |                  |
| <b>Quantitative</b>       | 99              | 89            | 89.90         | 1.001     | 0.999         | 1.003         | 3.014e-01      |                  |                   |                   | 3.118e-01    | 3.020e-01         |                  |

**Cohort: Validation**

**Outcome: Progression Free Survival by CPI ( Lung Transplant counts as event )**

**Predictor: S100A12 ( ng / mL )**

|                           | Patients<br>(N) | Events<br>(n) | Events<br>(%) | HR        | HR<br>95% LCL | HR<br>95% UCL | Wald<br>pvalue | Median<br>(yrs.) | Median<br>95% LCL | Median<br>95% UCL | LR<br>pvalue | Logrank<br>pvalue | DevLI<br>Np |
|---------------------------|-----------------|---------------|---------------|-----------|---------------|---------------|----------------|------------------|-------------------|-------------------|--------------|-------------------|-------------|
| <b>Quintiles</b>          |                 |               |               |           |               |               |                |                  |                   |                   |              |                   |             |
| < 36.6                    | 20              | 18            | 90.00         | ----      | ----          | ----          | ----           | 0.77             | 5.608e-01         | 1.081             | 2.55e-01     | 2.79e-01          | 2.66e-01    |
| [ 36.6,49.2)              | 19              | 17            | 89.47         | 9.192e-01 | 4.778e-01     | 1.768         | 8.007e-01      | 0.62             | 4.787e-01         |                   |              |                   |             |
| [ 49.2,65.9)              | 19              | 15            | 78.95         | 8.660e-01 | 4.431e-01     | 1.693         | 6.739e-01      | 0.94             | 6.895e-01         | 2.370             |              |                   |             |
| [ 65.9,105)               | 20              | 19            | 95.00         | 5.486e-01 | 2.719e-01     | 1.107         | 9.364e-02      | 0.77             | 4.321e-01         | 1.015             |              |                   |             |
| ≥ 105                     | 21              | 20            | 95.24         | 1.156     | 6.038e-01     | 2.212         | 6.622e-01      | 0.68             | 4.594e-01         | 1.185             |              |                   |             |
| <b>Quartiles</b>          |                 |               |               |           |               |               |                |                  |                   |                   |              |                   |             |
| < 39.7                    | 25              | 23            | 92.00         | ----      | ----          | ----          | ----           | 0.85             | 5.800e-01         | 1.081             | 8.99e-01     | 8.99e-01          | 9.12e-01    |
| [ 39.7,54.5)              | 24              | 21            | 87.50         | 9.397e-01 | 5.185e-01     | 1.703         | 8.374e-01      | 0.69             | 5.471e-01         | 1.415             |              |                   |             |
| [ 54.5,82.8)              | 24              | 20            | 83.33         | 8.978e-01 | 4.911e-01     | 1.641         | 7.261e-01      | 0.80             | 4.759e-01         | 1.180             |              |                   |             |
| ≥ 82.8                    | 26              | 25            | 96.15         | 1.117     | 6.298e-01     | 1.981         | 7.048e-01      | 0.73             | 4.710e-01         | 9.879e-01         |              |                   |             |
| <b>Tertiles</b>           |                 |               |               |           |               |               |                |                  |                   |                   |              |                   |             |
| < 43.9                    | 34              | 31            | 91.18         | ----      | ----          | ----          | ----           | 0.77             | 5.553e-01         | 1.081             | 1.55e-01     | 1.58e-01          | 9.09e-02    |
| [ 43.9,72.3)              | 31              | 25            | 80.65         | 7.221e-01 | 4.223e-01     | 1.235         | 2.340e-01      | 0.82             | 6.238e-01         | 1.913             |              |                   |             |
| ≥ 72.3                    | 34              | 33            | 97.06         | 1.207     | 7.354e-01     | 1.981         | 4.568e-01      | 0.68             | 4.513e-01         | 9.768e-01         |              |                   |             |
| <b>Profile Likelihood</b> |                 |               |               |           |               |               |                |                  |                   |                   |              |                   |             |
| < 72.1                    | 65              | 56            | 86.15         | ----      | ----          | ----          | ----           | 0.82             | 6.238e-01         | 9.879e-01         | 1.29e-01     | 1.20e-01          | 4.39e-02    |
| ≥ 72.1                    | 34              | 33            | 97.06         | 1.410     | 9.119e-01     | 2.181         | 1.222e-01      | 0.68             | 4.513e-01         | 9.768e-01         |              |                   |             |
| <b>Quantitative</b>       |                 |               |               |           |               |               |                |                  |                   |                   |              |                   |             |
|                           | 99              | 89            | 89.90         | 1.001     | 0.9968        | 1.005         | 7.260e-01      |                  |                   |                   | 7.293e-01    | 7.259e-01         |             |
